# Supplementary material for: CFDP1 regulates the stability of pericentric heterochromatin thereby affecting RAN GTPase activity and mitotic spindle formation
Source: PLOS journal article supplement (doi:10.1371/journal.pbio.3002574), 2024-04-17

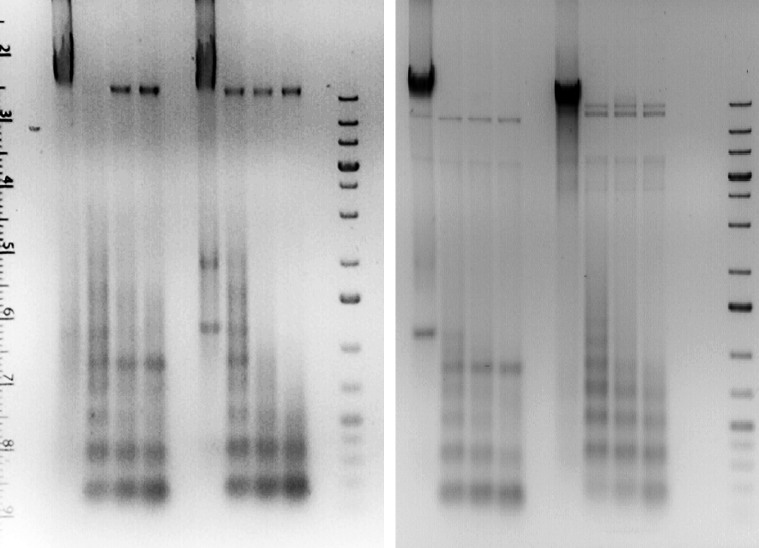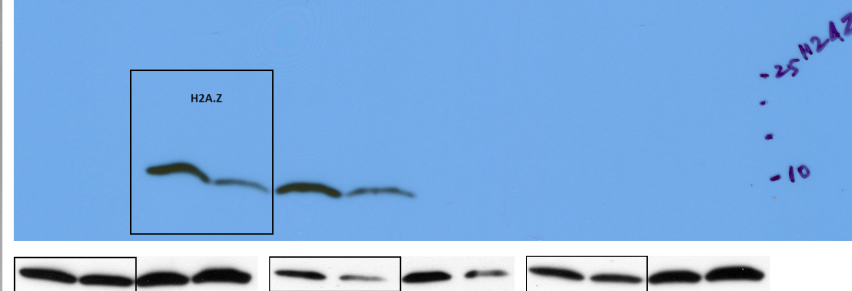

Figure 2I

Figure 2E,F

Figure 2

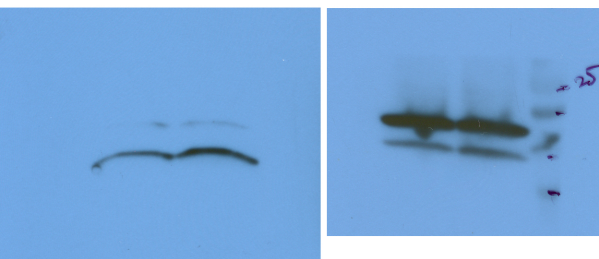

Figure 2J

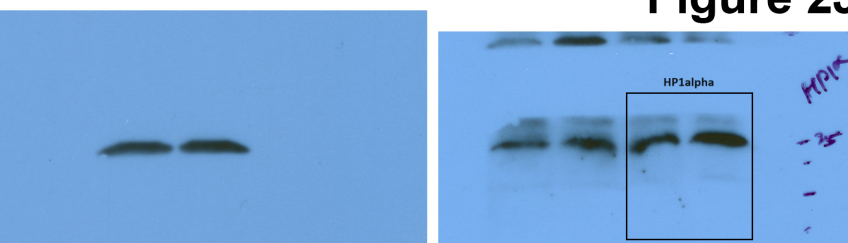

**Figure 3**

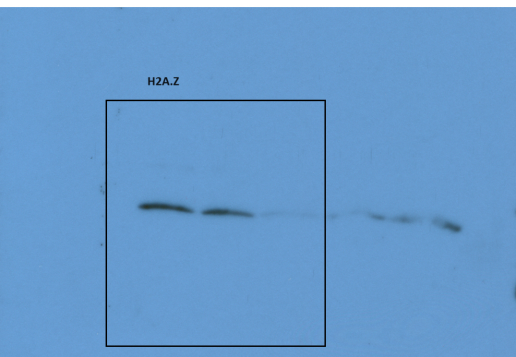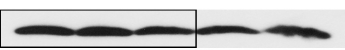

**Figure 3C**

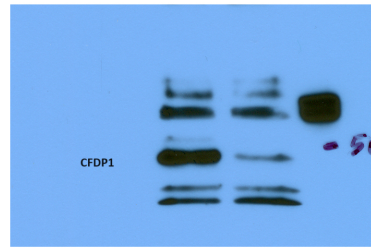

**Figure 3D**

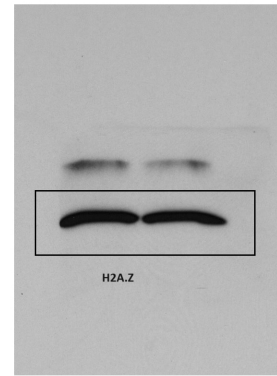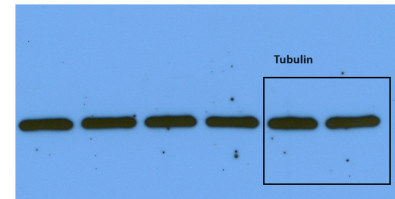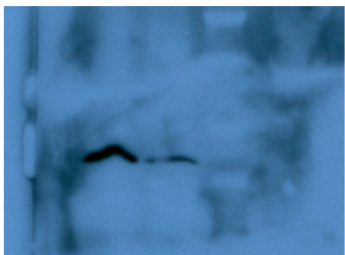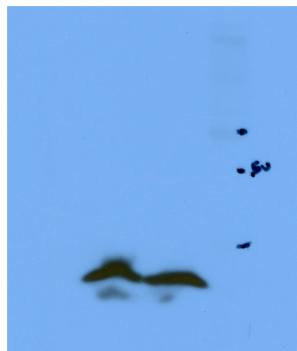

**Figure 3E**

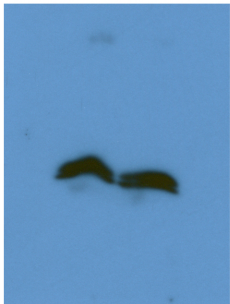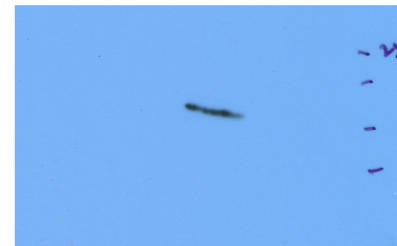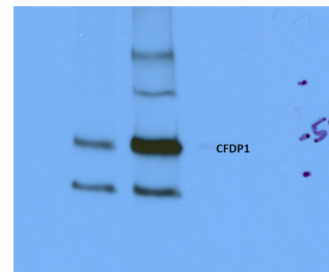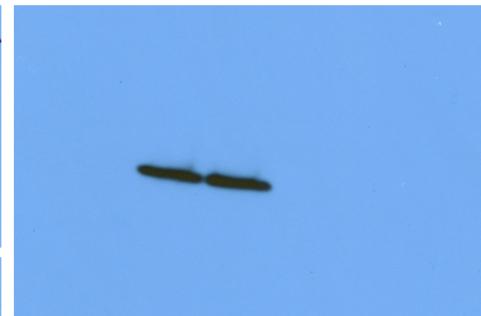

**Figure 3F**

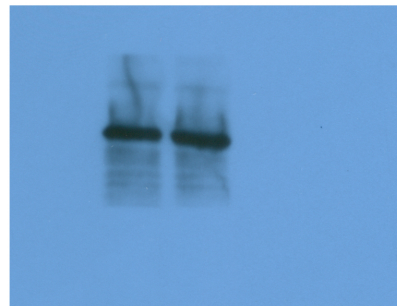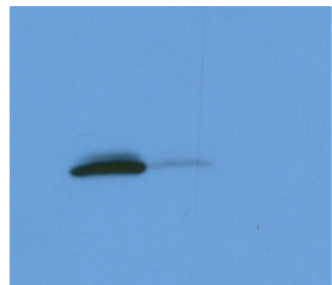

**Figure 3G**

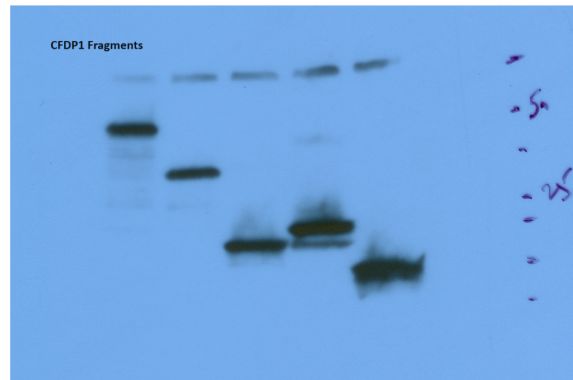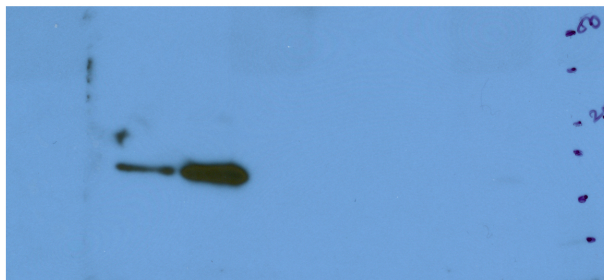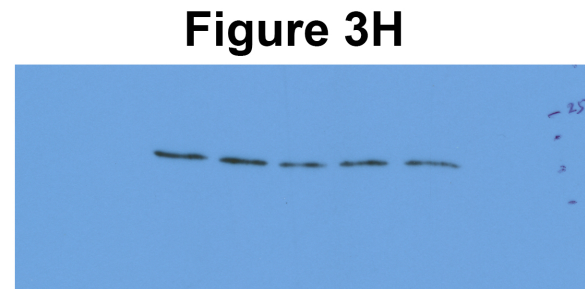

**Figure 3H**

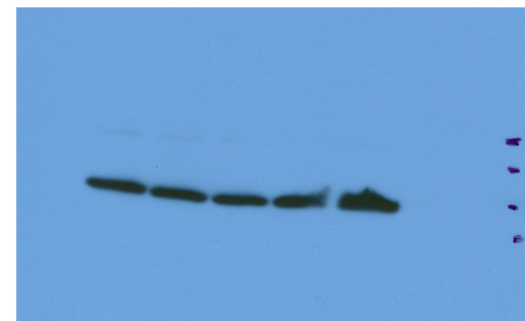



Figure 6

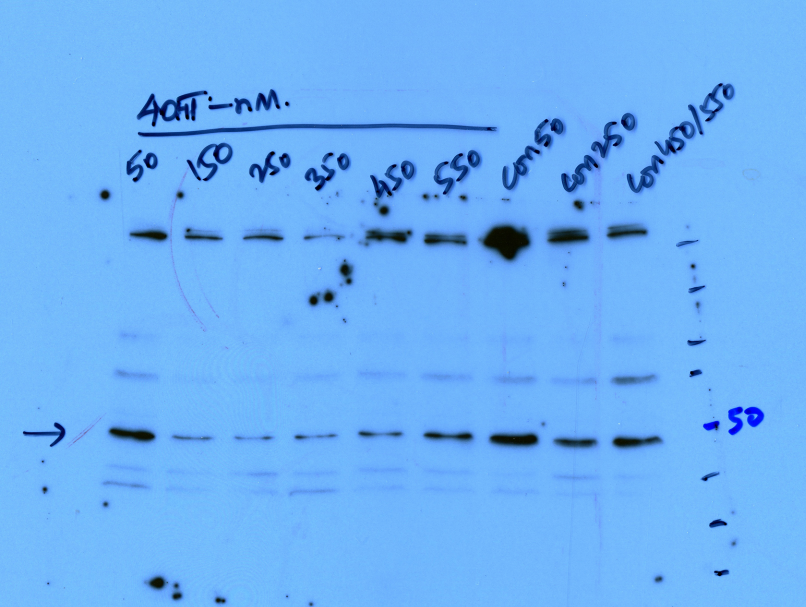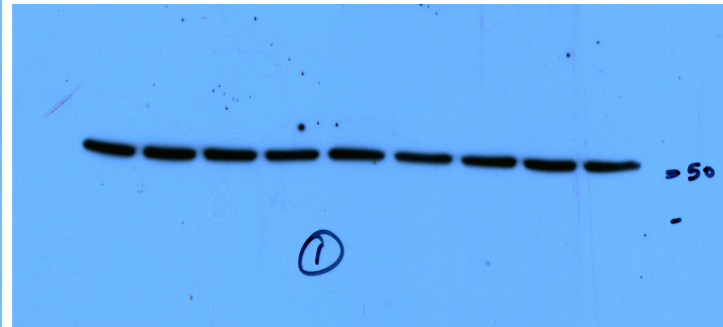

Figure 6B top

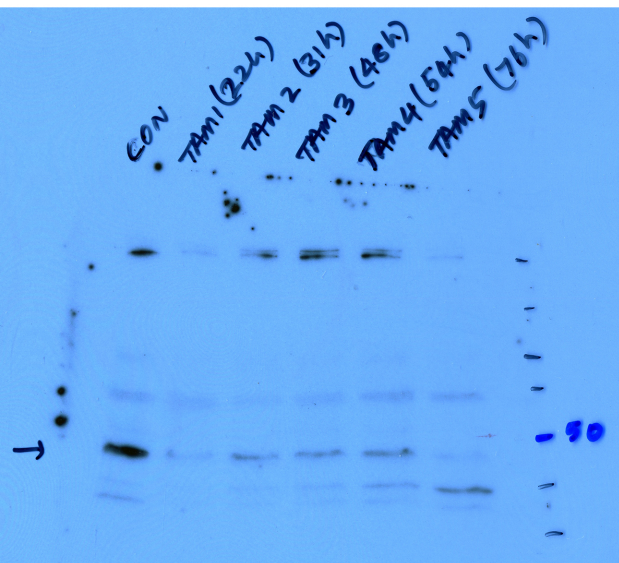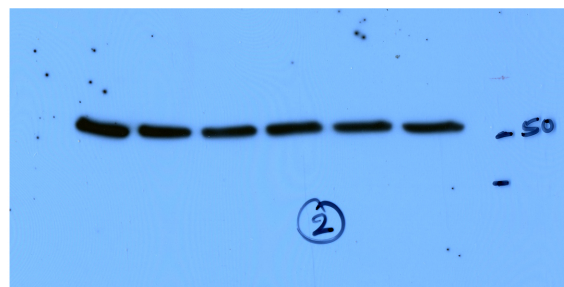

Figure 6B bottom

**Figure 7**

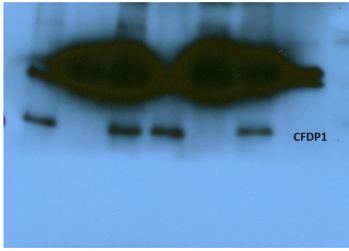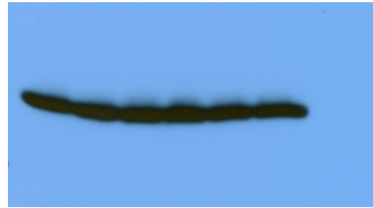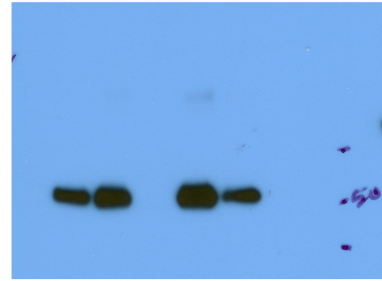

**Figure 7G**

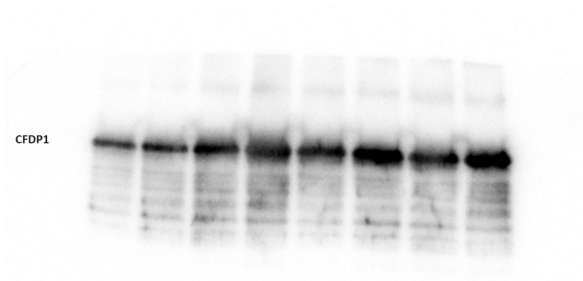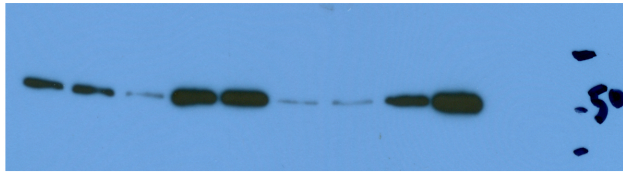

**Figure 7H**

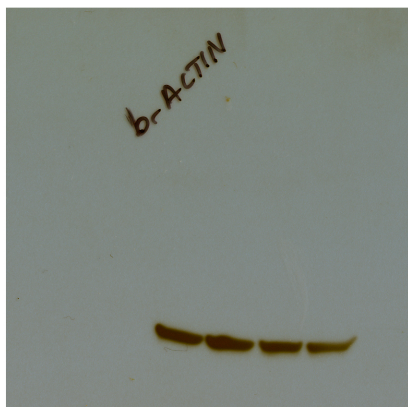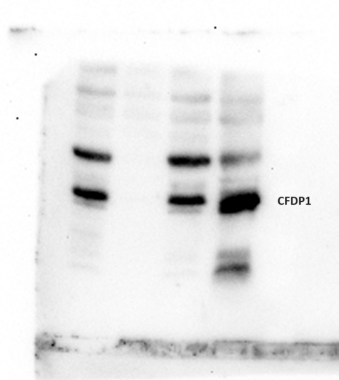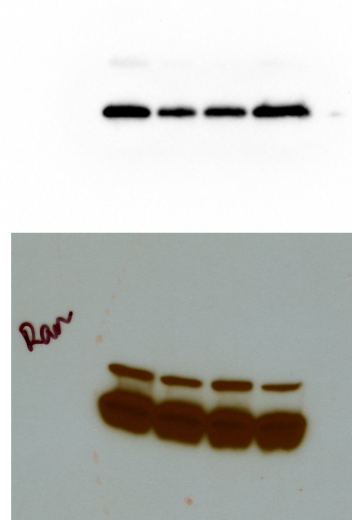

**Figure 7I**



Figure 8

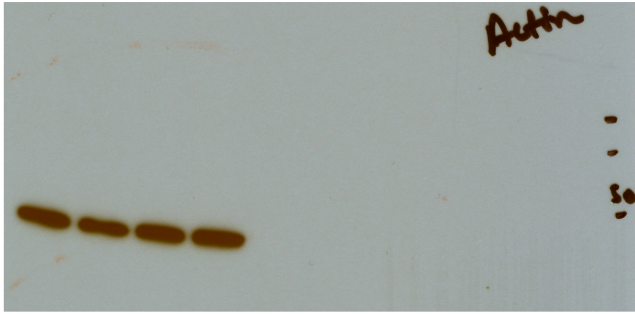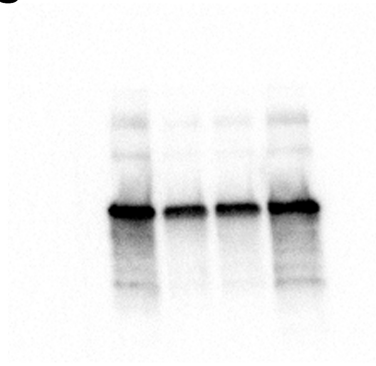

Figure 8C

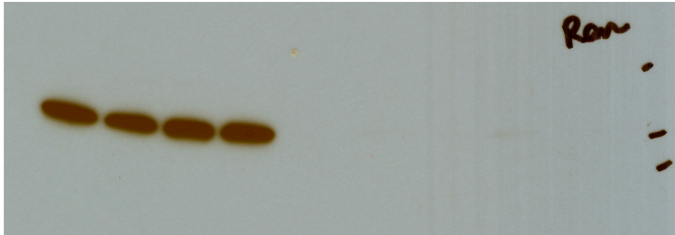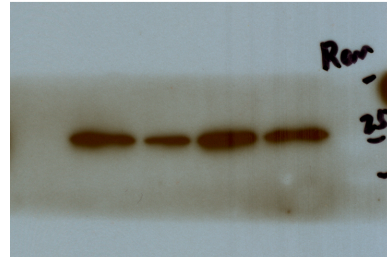

Supplement: S11 (10.1371/journal.pbio.3002574.s011) [file journal.pbio.3002574.s011]
