# Supplementary material for: CFDP1 regulates the stability of pericentric heterochromatin thereby affecting RAN GTPase activity and mitotic spindle formation
Source: PLoS Biol. 2024 Apr 17;22(4):e3002574. doi: 10.1371/journal.pbio.3002574 (PMC11023358; doi:10.1371/journal.pbio.3002574)
Supplement: S1 Data — (A) FRAP data in HP1 alpha GFP expressing cells after con si and CFDP1 siRNA. (B) FRAP data in HP1 alpha GFP expressing cells after CFDP1 overexpression. (C) FRAP data in H1f1-GFP expressing cells after con siRNA and CFDP1 siRNA. (XLSX) [file pbio.3002574.s012.xlsx]

## Sheet: con siRNA_S1A
	Con si RNA FRAP data on HP1 alpha GFP
	Time (seconds)	Mean Values	Standard Deviation	con si 15 a.xlsx	con si 15 b.xlsx	con si 15 c.xlsx	con si 15 d.xlsx	con si 15 e.xlsx	con si 16 a.xlsx	con si 16 b.xlsx	con si 16 c.xlsx	con si 16 d.xlsx	con si 16 e.xlsx	con si 17 a.xlsx	con si 17 b.xlsx	con si 17 c.xlsx	con si 17 d.xlsx	con si 17 e.xlsx	con si 4a.xlsx	con si 4b.xlsx	con si 4c.xlsx	con si 4d.xlsx	con si 4e.xlsx
	0	0.995784	0.013682	1.01387	0.964047	1.01224	0.96855	1.00995	1.00385	0.990943	0.988507	0.994299	0.988782	0.98411	0.988571	0.994741	0.992556	0.993024	1.00221	1.00341	0.999313	1.00882	1.01388
	0.964	0.999679	0.013	0.989509	1.03544	0.986717	1.00576	0.989979	1.00377	1.00464	1.00455	0.999749	1.00772	1.00099	1.00124	1.00366	1.00166	0.999303	0.998175	1.00098	0.98348	1.00868	0.967605
	1.927	1.00466	0.010045	0.996252	1.00136	1.00077	1.02678	0.999838	0.992283	1.00457	1.00715	1.00607	1.00368	1.01534	1.0105	1.00171	1.00597	1.00788	0.999562	0.995483	1.01747	0.982067	1.01851
	2.891	0.520743	0.118434	0.501186	0.658098	0.594711	0.48131	0.431444	0.655313	0.625759	0.742693	0.70711	0.644442	0.540818	0.515265	0.413159	0.427399	0.509824	0.357686	0.397223	0.407965	0.39509	0.408361
	3.854	0.657641	0.13104	0.616005	0.761213	0.709666	0.652748	0.588421	0.786363	0.757868	0.907392	0.848461	0.771444	0.722025	0.697725	0.5714	0.622333	0.711372	0.439547	0.495677	0.502483	0.490893	0.499775
	4.818	0.735261	0.135418	0.689	0.837706	0.750146	0.709135	0.671117	0.844223	0.823314	0.972142	0.92433	0.859864	0.835079	0.803671	0.655665	0.765421	0.810086	0.484668	0.582935	0.56515	0.545778	0.575793
	5.781	0.778064	0.134609	0.728907	0.820683	0.778172	0.758571	0.710977	0.875875	0.842077	0.995245	0.966629	0.904687	0.901625	0.880412	0.722866	0.857065	0.861486	0.522598	0.616873	0.601114	0.599268	0.616139
	6.745	0.812011	0.133382	0.754966	0.88818	0.772764	0.786848	0.724361	0.88526	0.845001	1.00302	0.992767	0.898123	0.968619	0.940076	0.776246	0.931341	0.91078	0.555352	0.668826	0.64242	0.628804	0.66646
	7.708	0.833287	0.133176	0.765446	0.878659	0.80506	0.80076	0.781384	0.876424	0.837733	1.01062	1.02033	0.923956	1.00989	0.964984	0.777536	0.950451	0.978699	0.585987	0.693168	0.67483	0.657214	0.672598
	8.672	0.851157	0.127596	0.806465	0.864587	0.82432	0.814399	0.772354	0.857875	0.84229	1.01228	1.04146	0.930206	1.03274	1.01038	0.823626	0.977997	0.971022	0.611673	0.724638	0.706427	0.686844	0.711567
	9.635	0.865117	0.12502	0.81295	0.908225	0.80188	0.811788	0.786017	0.851062	0.808301	1.02184	1.03918	0.932449	1.04473	1.03615	0.851961	0.991425	1.01159	0.635745	0.765975	0.741732	0.713066	0.73628
	10.599	0.875092	0.126161	0.815805	0.872085	0.805519	0.847625	0.806576	0.83159	0.808633	1.00529	1.02917	0.905437	1.0805	1.06721	0.916631	1.02265	1.03482	0.657949	0.771983	0.741745	0.721895	0.758732
	11.562	0.880216	0.130539	0.826365	0.879532	0.788631	0.851353	0.780148	0.836061	0.795922	0.997241	1.04109	0.901237	1.0935	1.07832	0.919283	1.05511	1.05427	0.663586	0.788854	0.742167	0.747476	0.764177
	12.526	0.884651	0.129164	0.829344	0.896425	0.79722	0.8404	0.760452	0.815936	0.774789	0.994267	1.05125	0.904175	1.0908	1.09103	0.934078	1.06309	1.05069	0.690253	0.789565	0.773059	0.754369	0.791837
	13.489	0.887409	0.132094	0.832193	0.899118	0.772065	0.846836	0.796401	0.794973	0.764175	0.996445	1.06007	0.889667	1.10494	1.10257	0.953063	1.05798	1.05472	0.685812	0.810395	0.782704	0.756402	0.787633
	14.453	0.906936	0.128836	0.869326	0.915258	0.839863	0.884505	0.839583	0.805217	0.747066	0.971513	1.07201	0.892272	1.12162	1.12278	0.986776	1.08875	1.0579	0.72563	0.828346	0.777257	0.767663	0.825375
	15.416	0.904017	0.132498	0.854845	0.939022	0.782409	0.877584	0.791479	0.804647	0.761772	0.959046	1.07356	0.866475	1.12447	1.11833	1.00273	1.08917	1.0681	0.711394	0.859348	0.787161	0.790403	0.818397
	16.38	0.911386	0.134398	0.887297	0.930995	0.807973	0.88865	0.824404	0.793243	0.757107	0.956693	1.07907	0.887356	1.13433	1.14335	0.968773	1.11027	1.09158	0.730533	0.829601	0.800204	0.781626	0.824665
	17.343	0.917923	0.127291	0.878318	0.926508	0.848992	0.898907	0.849374	0.815298	0.777696	0.967273	1.07869	0.891661	1.13269	1.13542	0.98224	1.08799	1.09908	0.735868	0.828878	0.818311	0.789405	0.815858
	18.307	0.921285	0.132697	0.891471	0.915732	0.840939	0.915132	0.837598	0.806829	0.746929	0.965896	1.08187	0.898394	1.13464	1.14234	0.993717	1.12105	1.10539	0.749068	0.858524	0.78417	0.793681	0.842345
	19.27	0.932923	0.130767	0.920612	0.895673	0.857874	0.903992	0.878486	0.813997	0.757085	0.982105	1.1059	0.913094	1.1506	1.15848	1.01034	1.09146	1.11778	0.752655	0.868135	0.808296	0.808197	0.863695
	20.234	0.925248	0.140427	0.891114	0.934616	0.825697	0.88144	0.854364	0.800972	0.728001	0.956413	1.09109	0.885565	1.161	1.16571	1.01909	1.1189	1.12811	0.755022	0.853639	0.798487	0.794954	0.860783
	21.197	0.926866	0.139513	0.89315	0.917418	0.82549	0.865411	0.819395	0.794614	0.753494	0.957021	1.11025	0.891335	1.1622	1.17001	1.03266	1.12271	1.10901	0.762425	0.858057	0.80909	0.807988	0.875592
	22.161	0.924786	0.143253	0.887292	0.938914	0.845995	0.853639	0.803518	0.782038	0.726114	0.949221	1.09582	0.876287	1.1748	1.18218	1.0644	1.11179	1.09146	0.77247	0.876273	0.800816	0.810177	0.852514
	23.124	0.934319	0.140139	0.881356	0.922732	0.934948	0.900892	0.828411	0.784206	0.725651	0.968343	1.10861	0.865939	1.1758	1.17674	1.01981	1.11122	1.13196	0.787425	0.875365	0.811589	0.805696	0.869693
	24.088	0.925482	0.142382	0.896177	0.90612	0.927868	0.886461	0.80107	0.761134	0.711477	0.926821	1.10543	0.846339	1.16776	1.1817	1.00407	1.11182	1.12502	0.796791	0.87848	0.803506	0.817268	0.85432
	25.051	0.93263	0.147143	0.867262	0.950254	0.877092	0.891724	0.819543	0.759459	0.719626	0.934932	1.11869	0.862362	1.18493	1.19867	1.03814	1.12236	1.12837	0.79986	0.903355	0.79543	0.834163	0.846375
	26.015	0.934973	0.147031	0.875797	0.917488	0.882036	0.856921	0.86459	0.778126	0.713569	0.936126	1.11738	0.860292	1.19071	1.20434	1.03659	1.12398	1.14017	0.79749	0.903291	0.791101	0.832236	0.877219
	26.978	0.931213	0.147305	0.870805	0.876189	0.897987	0.843271	0.85238	0.761656	0.712428	0.950165	1.11945	0.846096	1.18388	1.202	1.0173	1.12037	1.14246	0.796592	0.913281	0.807307	0.838062	0.872578
	27.942	0.93129	0.15189	0.870777	0.851936	0.862591	0.874968	0.846489	0.776715	0.708779	0.945547	1.13288	0.858563	1.20317	1.20364	1.02248	1.14141	1.13565	0.805915	0.894542	0.788416	0.828804	0.872518

## Sheet: CFDP1 siRNA_S1A
	CFDP1 siRNA FRAP data on HP1 alpha GFP
	Time (seconds)	Mean Values	Standard Deviation	cFDP1 SI 17 A.xlsx	cFDP1 SI 18 a.xlsx	cFDP1 SI 18 b.xlsx	cFDP1 SI 18 c.xlsx	cFDP1 SI 19 a.xlsx	cFDP1 SI 19 b.xlsx	cFDP1 SI 19 c.xlsx	cFDP1 SI 20 a.xlsx	cFDP1 SI 20 b.xlsx	cFDP1 SI 20 c.xlsx	cFDP1 SI 21 a.xlsx	cFDP1 SI 21 b.xlsx	cFDP1 SI 21 c.xlsx	cFDP1 SI 21 d.xlsx
	0	0.99709	0.011394	1.00409	0.987197	0.988644	0.987311	0.997251	1.00433	0.998473	1.0047	0.987581	0.986075	1.0032	1.02567	1.00107	0.98367
	0.959	1.00078	0.00743	1.00695	1.00086	1.0029	1.00191	0.991068	1.00284	1.01485	0.987424	1.01076	0.996381	0.998221	0.992951	0.999693	1.00409
	1.917	1.0022	0.011475	0.988737	1.01223	1.00869	1.01106	1.01192	0.992638	0.986496	1.00793	1.0019	1.01807	0.998507	0.980746	0.999211	1.01265
	2.876	0.584558	0.141577	0.340727	0.653501	0.753371	0.602586	0.725273	0.722646	0.760904	0.381854	0.406923	0.526027	0.617629	0.66283	0.4671	0.562435
	3.835	0.726149	0.149561	0.542656	0.873329	0.952238	0.818145	0.85726	0.877998	0.859881	0.489348	0.544887	0.644156	0.713601	0.71064	0.581038	0.700907
	4.793	0.801495	0.145044	0.63571	0.97386	1.02134	0.954184	0.940131	0.89546	0.900695	0.570186	0.650021	0.722296	0.778591	0.774217	0.663255	0.740981
	5.752	0.837948	0.136944	0.685065	1.01889	1.0473	1.0171	0.951971	0.906637	0.891516	0.624301	0.710967	0.742293	0.812363	0.809624	0.703869	0.809368
	6.711	0.864921	0.132629	0.720137	1.04833	1.06451	1.05387	0.993861	0.907404	0.905582	0.669848	0.757384	0.763503	0.849766	0.817365	0.754366	0.802969
	7.67	0.883613	0.121485	0.744638	1.0503	1.0725	1.07226	1.00035	0.909146	0.901044	0.715804	0.78229	0.807157	0.854513	0.829997	0.787128	0.843461
	8.628	0.902888	0.116594	0.759627	1.06419	1.07974	1.08057	1.00852	0.940304	0.93013	0.744711	0.801962	0.824865	0.867025	0.876135	0.815597	0.847047
	9.587	0.908083	0.116285	0.784281	1.0726	1.08813	1.09382	1.02736	0.926198	0.922406	0.758457	0.815319	0.854958	0.850498	0.825083	0.83598	0.858072
	10.546	0.916371	0.109953	0.781647	1.0813	1.09264	1.09732	1.00946	0.930626	0.882909	0.779936	0.842335	0.877165	0.885215	0.850485	0.843262	0.874895
	11.504	0.928119	0.109168	0.798279	1.09391	1.10583	1.10672	1.00997	0.957986	0.897021	0.796666	0.863418	0.867188	0.906449	0.851815	0.860943	0.877479
	12.463	0.931852	0.108745	0.821737	1.0917	1.10567	1.11535	1.01739	0.935402	0.943983	0.80426	0.869734	0.836066	0.922731	0.857766	0.856308	0.867829
	13.422	0.941011	0.110314	0.82041	1.10117	1.1204	1.12329	1.03869	0.937955	0.952612	0.82986	0.866141	0.856991	0.921807	0.83515	0.887356	0.882339
	14.381	0.942959	0.113607	0.823599	1.11311	1.132	1.13141	1.0253	0.960198	0.920554	0.799199	0.856027	0.886889	0.905769	0.846627	0.893139	0.907621
	15.339	0.953324	0.114199	0.822173	1.12353	1.13379	1.13606	1.04186	0.998055	0.949692	0.829021	0.862894	0.884544	0.908306	0.843173	0.888134	0.925296
	16.298	0.957198	0.114056	0.828776	1.13165	1.13747	1.14621	1.0184	0.998687	0.963493	0.849918	0.883791	0.900755	0.912289	0.809563	0.903318	0.91646
	17.257	0.965823	0.115348	0.835721	1.1355	1.14358	1.14962	1.04434	0.981876	0.996137	0.833806	0.899911	0.912098	0.914564	0.812814	0.904549	0.957021
	18.215	0.970229	0.118598	0.819419	1.13806	1.1538	1.15885	1.05125	1.00145	0.982693	0.850619	0.905773	0.950804	0.930561	0.797885	0.923178	0.918857
	19.174	0.974637	0.12348	0.80625	1.14854	1.15864	1.16667	1.07829	1.00493	1.02663	0.851029	0.880791	0.92676	0.901697	0.841144	0.912304	0.941241
	20.133	0.979083	0.121637	0.842783	1.14802	1.16125	1.17188	1.08224	1.02282	0.99604	0.853072	0.887712	0.95047	0.906252	0.814047	0.917901	0.952673
	21.091	0.977978	0.122256	0.841338	1.15411	1.1681	1.17789	1.06528	1.01795	1.01456	0.842982	0.904652	0.893084	0.90736	0.8465	0.934099	0.923788
	22.05	0.985454	0.121233	0.850557	1.16227	1.18691	1.18268	1.08388	0.995891	0.999311	0.885109	0.908282	0.880391	0.920012	0.85404	0.944659	0.942367
	23.009	0.984798	0.120311	0.85674	1.16375	1.18568	1.1911	1.06072	1.00736	0.967255	0.902412	0.917875	0.87933	0.932943	0.838438	0.946983	0.936585
	23.968	0.983023	0.125342	0.867526	1.16745	1.18682	1.19845	1.06116	1.03708	0.964306	0.887524	0.923103	0.859049	0.912362	0.839462	0.924382	0.933639
	24.926	0.98626	0.128198	0.892134	1.17481	1.19323	1.2019	1.07569	1.01894	0.995283	0.882483	0.922829	0.851198	0.908532	0.825382	0.927962	0.937268
	25.885	0.993825	0.12632	0.898832	1.179	1.19502	1.20785	1.0736	1.04829	0.995021	0.872212	0.940813	0.884171	0.913688	0.833694	0.930383	0.940967
	26.844	0.987175	0.128209	0.881908	1.18017	1.18463	1.21645	1.06553	1.03497	0.968359	0.875291	0.950255	0.887708	0.917196	0.824666	0.916943	0.916369
	27.802	0.991697	0.129095	0.890236	1.18182	1.2063	1.22553	1.07878	1.0105	0.976139	0.886064	0.933703	0.875594	0.905103	0.859448	0.925323	0.92922

## Sheet: Figure S1A
FRAP data in HP1 alpha GFP expressing cells after con si and CFDP1 siRNA
Time	con si		CFDP1 si
0	0.998318		0.999646
0.964	0.998141		1.00048
1.927	1.00362		0.999891
2.891	0.474223		0.561304
3.854	0.591606		0.683852
4.818	0.66058		0.751958
5.781	0.698405		0.786179
6.745	0.730279		0.812926
7.708	0.751383		0.834139
8.672	0.773092		0.855993
9.635	0.791506		0.859874
10.599	0.801832		0.868903
11.562	0.804401		0.880655
12.526	0.813431		0.884837
13.489	0.817691		0.893574
14.453	0.845988		0.893175
15.416	0.840104		0.904832
16.38	0.84684		0.907768
17.343	0.85536		0.91753
18.307	0.860064		0.921136
19.27	0.87342		0.924642
20.234	0.862898		0.929637

## Sheet: pSFCMV_S1B
Date: 22/2/2024
Report: Normalized Data using Double Method
Time (seconds)	Mean Values	Standard Deviation	3t3 vec10b.xlsx	3t3 vec11a.xlsx	3t3 vec11b.xlsx	3t3 vec12a.xlsx	3t3 vec12b.xlsx	3t3 vec13.xlsx	3t3 vec14.xlsx	3t3 vec15.xlsx	3t3 vec17a.xlsx	3t3 vec17b.xlsx	3t3 vec18a.xlsx	3t3 vec18b.xlsx	3t3 vec19.xlsx	3t3 vec2.xlsx	3t3 vec20a.xlsx	3t3 vec20b.xlsx	3t3 vec4a.xlsx	3t3 vec4b.xlsx	3t3 vec5a.xlsx	3t3 vec8a.xlsx
0	1	0	1	1	1	1	1	1	1	1	1	1	1	1	1	1	1	1	1	1	1	1
0.955	1.0004	0.028864	1.02256	0.959359	1.04224	0.958474	0.952079	0.980834	1.01987	1.01791	0.991733	0.980241	1.01932	1.01311	1.01266	1.00038	0.984282	1.02901	1.05268	0.963437	0.990011	1.01789
1.91	0.987666	0.038682	1.06991	0.924451	1.05203	0.96014	0.942469	0.9838	0.970188	1.00506	0.977296	0.975083	0.939453	1.02577	0.992827	0.964709	0.980854	0.993128	1.02437	0.938793	1.01245	1.02055
2.865	0.585894	0.043735	0.601045	0.65885	0.66019	0.590993	0.589339	0.626397	0.528037	0.565641	0.540401	0.529055	0.593753	0.623073	0.569327	0.613277	0.553694	0.615349	0.524641	0.518044	0.588448	0.62832
3.821	0.664556	0.048159	0.703371	0.684054	0.771179	0.672941	0.646274	0.668106	0.621554	0.652083	0.624977	0.598265	0.651541	0.756435	0.647742	0.673879	0.630204	0.698725	0.627368	0.578931	0.670446	0.71304
4.776	0.699424	0.050944	0.732983	0.719101	0.783797	0.723716	0.716728	0.709998	0.637188	0.699391	0.629991	0.630538	0.69594	0.773432	0.682731	0.712009	0.669585	0.76897	0.634993	0.614871	0.695899	0.756612
5.731	0.735019	0.050028	0.746776	0.789347	0.811301	0.75994	0.721495	0.745682	0.655179	0.72196	0.702847	0.683459	0.729447	0.831964	0.72347	0.749136	0.696113	0.77584	0.669677	0.649653	0.749309	0.787793
6.686	0.758564	0.05343	0.787362	0.782468	0.867287	0.796895	0.754211	0.763361	0.698266	0.769519	0.697337	0.701956	0.773551	0.825771	0.744704	0.763778	0.722957	0.815454	0.650991	0.685081	0.763391	0.806934
7.641	0.778058	0.049905	0.82121	0.825256	0.848775	0.781949	0.788838	0.804312	0.694273	0.80243	0.712488	0.755089	0.780456	0.822883	0.763554	0.77223	0.736433	0.839308	0.691298	0.694497	0.80109	0.824789
8.596	0.799385	0.045152	0.822309	0.815329	0.89299	0.807218	0.806412	0.812126	0.754585	0.795476	0.72629	0.783167	0.771955	0.858645	0.788107	0.814964	0.789633	0.857937	0.717721	0.729195	0.805496	0.838144
9.552	0.813637	0.045035	0.824621	0.86004	0.870715	0.833762	0.801416	0.869187	0.750647	0.839506	0.743651	0.784004	0.816105	0.884947	0.779943	0.839935	0.789466	0.847686	0.730587	0.763647	0.801827	0.841056
10.507	0.824435	0.051409	0.867745	0.8748	0.913598	0.810684	0.786492	0.84081	0.768757	0.861129	0.735909	0.836276	0.83069	0.877896	0.80042	0.871942	0.820307	0.856879	0.729211	0.7406	0.816278	0.848271
11.462	0.832598	0.048845	0.937223	0.846268	0.837764	0.824796	0.813146	0.802531	0.76902	0.882701	0.761348	0.841959	0.862916	0.889363	0.81594	0.888377	0.835896	0.862887	0.75473	0.752974	0.825464	0.84665
12.417	0.841674	0.035154	0.910256	0.857468	0.816733	0.844194	0.76013	0.851776	0.816066	0.865197	0.809408	0.836008	0.85709	0.871755	0.841186	0.878807	0.863576	0.872221	0.796019	0.791361	0.835803	0.858419
13.372	0.848596	0.042229	0.944451	0.876605	0.847699	0.834244	0.773218	0.836052	0.809778	0.876388	0.786065	0.870308	0.874772	0.883728	0.843103	0.878885	0.868304	0.882749	0.777254	0.809338	0.858112	0.840858
14.327	0.846268	0.045276	0.94991	0.875243	0.852021	0.803722	0.773689	0.874296	0.798921	0.853452	0.792997	0.859527	0.869687	0.865603	0.827368	0.883476	0.865886	0.909866	0.794787	0.780041	0.843481	0.851389
15.283	0.851685	0.047939	0.943905	0.838711	0.798098	0.84587	0.780893	0.872565	0.799126	0.89804	0.772613	0.896614	0.850784	0.908853	0.839323	0.899842	0.842708	0.914194	0.816986	0.803818	0.845231	0.865515
16.238	0.857729	0.042681	0.915726	0.856508	0.857264	0.81714	0.749402	0.897316	0.816131	0.879821	0.819776	0.92073	0.83731	0.892584	0.854132	0.893079	0.87246	0.909183	0.821125	0.82321	0.847426	0.874258
17.193	0.862335	0.049719	0.924272	0.880785	0.899836	0.792263	0.750825	0.883665	0.850682	0.904113	0.77835	0.929906	0.834109	0.888291	0.853123	0.878021	0.884472	0.927443	0.815763	0.864364	0.828564	0.877852
18.148	0.865763	0.05261	0.91251	0.872287	0.833297	0.783539	0.731136	0.900933	0.861664	0.903015	0.797044	0.932437	0.876594	0.937588	0.856713	0.890633	0.862014	0.922779	0.82324	0.866117	0.849808	0.90192

## Sheet: pSFCMV CFDP1_S1B
Date: 22/2/2024
Report: Normalized Data using Double Method
Time (seconds)	Mean Values	Standard Deviation	Cfdp1 10a.xlsx	Cfdp1 10b.xlsx	Cfdp1 11a.xlsx	Cfdp1 11b.xlsx	Cfdp1 12.xlsx	Cfdp1 13.xlsx	Cfdp1 16b.xlsx	Cfdp1 17a.xlsx	Cfdp1 18.xlsx	Cfdp1 19a.xlsx	Cfdp1 19b.xlsx	Cfdp1 1a.xlsx	Cfdp1 1b.xlsx	Cfdp1 20b.xlsx	Cfdp1 20c.xlsx	Cfdp1 22a.xlsx	Cfdp1 22b.xlsx	Cfdp1 23a.xlsx	Cfdp1 23b.xlsx	Cfdp1 23c.xlsx	Cfdp1 23d.xlsx	Cfdp1 2a.xlsx	Cfdp1 3.xlsx	Cfdp1 4.xlsx	Cfdp1 5b.xlsx	Cfdp1 5c.xlsx	Cfdp1 6.xlsx	Cfdp1 8b.xlsx	Cfdp1 9a.xlsx	Cfdp1 9b.xlsx
0	1	0	1	1	1	1	1	1	1	1	1	1	1	1	1	1	1	1	1	1	1	1	1	1	1	1	1	1	1	1	1	1
0.96	0.993987	0.027093	0.971686	0.968799	0.983903	0.951121	1.03693	0.996392	0.963005	0.970442	0.922224	0.988107	0.987481	0.989584	0.977029	1.03531	1.01769	1.02946	1.00304	1.00541	1.0229	0.996144	1.00392	1.00274	1.00274	0.991686	1.00573	1.04912	0.981271	1.01502	0.976682	0.974035
1.921	0.998906	0.029783	0.982918	0.977279	1.00311	0.969715	0.991857	0.98945	0.956576	0.990686	0.981437	0.981424	0.982695	0.940497	0.957282	1.02909	1.00849	1.02885	1.05387	0.984875	1.02173	1.0172	1.01981	0.999604	1.01025	1.06097	1.01337	1.05633	0.996941	1.01289	0.993678	0.954304
2.881	0.593293	0.057804	0.523801	0.564132	0.648385	0.642853	0.498094	0.58766	0.658659	0.58716	0.639761	0.624152	0.653097	0.598962	0.604108	0.574277	0.585122	0.568282	0.531231	0.492659	0.491854	0.468686	0.574941	0.646069	0.642876	0.611367	0.608386	0.621091	0.574189	0.701495	0.608503	0.66694
3.841	0.663441	0.055922	0.609564	0.620991	0.709429	0.716479	0.582892	0.646617	0.702547	0.711233	0.698015	0.682646	0.728036	0.656621	0.665465	0.646763	0.627451	0.674587	0.621291	0.560866	0.532207	0.559841	0.632444	0.729079	0.694629	0.659366	0.709513	0.665345	0.708136	0.757515	0.671633	0.722042
4.801	0.704504	0.054981	0.647838	0.647343	0.750989	0.753444	0.578419	0.74273	0.742549	0.742108	0.73674	0.704409	0.771241	0.66475	0.721204	0.716389	0.657992	0.71967	0.677733	0.619343	0.601592	0.604697	0.704456	0.781618	0.724244	0.694088	0.716247	0.725268	0.725518	0.787264	0.710205	0.765032
5.762	0.739383	0.063545	0.696286	0.685474	0.776951	0.779129	0.64115	0.769361	0.84011	0.794467	0.799062	0.729222	0.781443	0.689257	0.714727	0.738777	0.704804	0.760976	0.725944	0.633676	0.603237	0.609032	0.699666	0.812556	0.788554	0.772212	0.739674	0.777184	0.733231	0.852036	0.731666	0.801615
6.722	0.757824	0.055916	0.715793	0.70928	0.816343	0.783347	0.650471	0.786297	0.80852	0.790445	0.795829	0.755556	0.806368	0.707568	0.751652	0.758781	0.72704	0.785803	0.746955	0.657885	0.676301	0.625722	0.725445	0.841209	0.787203	0.745973	0.760604	0.785436	0.793005	0.864483	0.784227	0.791169
7.682	0.771948	0.055378	0.741476	0.732364	0.81488	0.777852	0.63134	0.815157	0.838376	0.76895	0.819353	0.771421	0.834731	0.719507	0.749627	0.756364	0.769496	0.804681	0.759891	0.681553	0.702039	0.659957	0.759985	0.841984	0.781128	0.740236	0.792429	0.798843	0.814705	0.876149	0.791302	0.812663
8.642	0.775583	0.054702	0.734242	0.751719	0.81155	0.780249	0.63411	0.774464	0.832763	0.808451	0.840782	0.791591	0.832111	0.719619	0.750955	0.770007	0.763064	0.802024	0.787262	0.697486	0.693329	0.681676	0.749177	0.845162	0.765626	0.723915	0.791687	0.838647	0.842237	0.849434	0.781768	0.822392
9.603	0.794446	0.055412	0.783432	0.780725	0.835201	0.797078	0.614637	0.802669	0.858657	0.826617	0.798874	0.763118	0.845012	0.719219	0.749504	0.839811	0.800178	0.825222	0.798243	0.727282	0.721582	0.731321	0.786797	0.863536	0.801458	0.757805	0.783087	0.85134	0.856205	0.876178	0.812383	0.826212
10.563	0.805355	0.056839	0.786222	0.77178	0.842432	0.787448	0.615117	0.826326	0.860338	0.842355	0.818328	0.783497	0.873297	0.742953	0.771208	0.815834	0.821802	0.836182	0.813352	0.740682	0.759722	0.710809	0.792573	0.872656	0.807385	0.785843	0.834294	0.871957	0.832699	0.91118	0.812633	0.819732
11.523	0.812881	0.054129	0.786443	0.788659	0.875425	0.765232	0.658805	0.806408	0.883512	0.85029	0.81685	0.779009	0.879789	0.766458	0.769593	0.860478	0.849675	0.863613	0.82039	0.735043	0.766557	0.736184	0.783838	0.860102	0.81287	0.794785	0.856332	0.897057	0.843561	0.8731	0.793278	0.813089
12.483	0.813828	0.058216	0.78374	0.825466	0.866806	0.771948	0.618976	0.837391	0.859317	0.856151	0.799759	0.770909	0.859949	0.749457	0.804586	0.873097	0.853281	0.846132	0.8307	0.733285	0.777332	0.753185	0.804412	0.889125	0.778485	0.817729	0.860992	0.911769	0.81044	0.879885	0.802529	0.787998
13.444	0.81911	0.061971	0.790085	0.798877	0.893935	0.781828	0.64706	0.869566	0.933623	0.87692	0.843212	0.783808	0.881427	0.743776	0.803904	0.87373	0.87754	0.815819	0.857637	0.745136	0.763537	0.736219	0.773993	0.895046	0.786957	0.807025	0.836811	0.880445	0.843639	0.871957	0.774465	0.785314
14.404	0.823649	0.059361	0.782189	0.807123	0.891016	0.773529	0.617654	0.868196	0.895046	0.861392	0.820613	0.775762	0.875031	0.740319	0.804366	0.897633	0.838202	0.820548	0.816579	0.764006	0.822092	0.784687	0.824503	0.87094	0.811273	0.817474	0.882364	0.876908	0.869888	0.906258	0.793537	0.800336
15.364	0.823654	0.058594	0.814175	0.813292	0.917245	0.774315	0.61359	0.833207	0.869988	0.867903	0.821787	0.759089	0.837794	0.747443	0.820734	0.890924	0.862998	0.844503	0.83473	0.775201	0.814234	0.764272	0.836783	0.870381	0.809156	0.848684	0.902474	0.879544	0.84974	0.853877	0.810594	0.770977
16.324	0.82438	0.055508	0.825959	0.805827	0.897689	0.788737	0.618427	0.824846	0.882258	0.868026	0.818352	0.770534	0.859466	0.764937	0.794898	0.891828	0.83247	0.828768	0.832432	0.777813	0.826898	0.797792	0.860231	0.885755	0.797462	0.860136	0.881615	0.878055	0.864316	0.826851	0.801082	0.767937
17.285	0.826504	0.061885	0.823272	0.836969	0.887141	0.756706	0.618586	0.880745	0.867025	0.859583	0.801096	0.791971	0.885702	0.744946	0.820435	0.887618	0.844836	0.812706	0.827931	0.796288	0.844798	0.793843	0.842811	0.870859	0.780507	0.856196	0.946266	0.88901	0.890926	0.795204	0.768672	0.772456
18.245	0.836396	0.065733	0.847658	0.823948	0.906682	0.758	0.619631	0.858756	0.909164	0.917814	0.824991	0.778279	0.888032	0.75177	0.817145	0.918182	0.877074	0.832207	0.843722	0.773131	0.817234	0.842333	0.813328	0.895461	0.776892	0.889399	0.935741	0.863839	0.886281	0.845968	0.794406	0.784806

## Sheet: Figure S1B
	FRAP data in HP1 alpha GFP after CFDP1 overexpression
	Time (s)	pSFCMV		pSFCMV CFDP1
	0	1		1
	0.955	1.0004		0.993987
	1.91	0.987666		0.998906
	2.864	0.585894		0.593293
	3.819	0.664556		0.663441
	4.774	0.699424		0.704504
	5.729	0.735019		0.739383
	6.684	0.758564		0.757824
	7.639	0.778058		0.771948
	8.593	0.799385		0.775583
	9.548	0.813637		0.794446
	10.503	0.824435		0.805355
	11.458	0.832598		0.812881
	12.413	0.831674		0.813828
	13.368	0.848596		0.81911
	14.322	0.846268		0.823649
	15.277	0.851685		0.823654
	16.232	0.857729		0.82438
	17.187	0.860335		0.826504
	18.142	0.860763		0.836396

## Sheet: con siRNA_S1C
Date: 11/9/2020
Report: Normalized Data using Double Method
Time (seconds)	Mean Values	Standard Deviation	con si a1.xlsx	con si f1.xlsx	con si f2.xlsx	con si f3.xlsx	con si f4.xlsx	con si h1.xlsx	con si h2.xlsx	con si h3.xlsx	con si i1.xlsx	con si i2.xlsx	con si r1.xlsx	con si r2.xlsx
0	1.00638	0.011588	1.01184	1.01543	1.02515	1.00514	0.99582	1.0195	0.987497	1.01653	1.00763	0.994509	1.00098	0.996543
0.958	1.0036	0.012692	0.997332	1.01215	0.989075	1.00901	0.997297	0.991409	0.987803	1.02068	1.01484	1.02561	1.00332	0.994706
1.916	0.989785	0.017354	0.9904	0.972083	0.984904	0.985789	1.00698	0.988389	1.02511	0.962261	0.977076	0.979912	0.9957	1.00881
2.874	0.466836	0.038524	0.518391	0.410311	0.435239	0.418891	0.465239	0.479287	0.488484	0.477203	0.531211	0.496617	0.436632	0.444521
3.832	0.561228	0.031617	0.600198	0.534583	0.516622	0.505008	0.539839	0.581815	0.599083	0.566681	0.595938	0.565366	0.568384	0.561223
4.791	0.632278	0.038667	0.654534	0.623883	0.58127	0.577202	0.571628	0.648154	0.679376	0.660293	0.659449	0.627198	0.681811	0.622542
5.749	0.672641	0.026592	0.683504	0.668094	0.636809	0.637674	0.63487	0.713949	0.706701	0.698675	0.676646	0.677136	0.675768	0.661867
6.707	0.717944	0.0301	0.724163	0.751615	0.677612	0.675824	0.677663	0.742216	0.765623	0.741366	0.713726	0.702589	0.72782	0.715112
7.665	0.733971	0.03381	0.743414	0.771869	0.675245	0.682094	0.704892	0.767487	0.775219	0.711628	0.759841	0.740025	0.738779	0.737158
8.623	0.763811	0.040869	0.783023	0.791306	0.696078	0.703293	0.742249	0.815935	0.821889	0.774518	0.766109	0.719	0.778309	0.774027
9.581	0.772135	0.026982	0.763209	0.807038	0.742829	0.722768	0.746975	0.796117	0.794863	0.771062	0.796159	0.753524	0.771296	0.799779
10.539	0.783161	0.028301	0.779444	0.806127	0.743598	0.771956	0.763689	0.774549	0.816207	0.74153	0.79512	0.781891	0.78451	0.839314
11.497	0.809766	0.026293	0.830367	0.82878	0.791918	0.777545	0.793241	0.799407	0.840729	0.794936	0.793147	0.783798	0.820244	0.86308
12.455	0.826122	0.021759	0.831177	0.862482	0.815184	0.790525	0.804115	0.813049	0.858658	0.814789	0.82053	0.818688	0.838124	0.846144
13.414	0.834131	0.026435	0.820658	0.86082	0.834876	0.805198	0.813202	0.831793	0.83093	0.787674	0.838714	0.836091	0.872624	0.876989
14.372	0.839855	0.017804	0.848858	0.852851	0.835349	0.814345	0.846045	0.826369	0.847735	0.805903	0.827372	0.859661	0.858002	0.855765
15.33	0.839104	0.031058	0.843667	0.851619	0.816908	0.823115	0.838334	0.82638	0.845927	0.768318	0.842432	0.857438	0.85346	0.90165
16.288	0.851203	0.028266	0.84827	0.882262	0.819696	0.851912	0.836804	0.843514	0.827556	0.800124	0.865883	0.894189	0.857127	0.887105
17.246	0.853768	0.028174	0.840826	0.90911	0.849011	0.853613	0.848279	0.809944	0.871582	0.804731	0.869202	0.859184	0.87695	0.852787
18.204	0.858315	0.03559	0.817656	0.908912	0.870145	0.86124	0.849554	0.824816	0.831683	0.80483	0.863928	0.869743	0.872276	0.924991

## Sheet: CFDP1 siRNA_S1C
Date: 26/8/2020
Report: Normalized Data using Double Method
Time (seconds)	Mean Values	Standard Deviation	CP27 si b1.xlsx	CP27 si e1.xlsx	CP27 si f1.xlsx	CP27 si f2.xlsx	CP27 si f3.xlsx	CP27 si g2.xlsx	CP27 si g3.xlsx	CP27 si h2.xlsx	CP27 si h4.xlsx	CP27 si i1.xlsx	CP27 si i2.xlsx	CP27 si i3.xlsx	CP27 si j1.xlsx	CP27 si j2.xlsx	CP27 si j3.xlsx	CP27 si j4.xlsx	CP27 si j5.xlsx	CP27 si j6.xlsx	CP27 si k2.xlsx	CP27 si k3.xlsx	CP27 si k4.xlsx	CP27 si m3.xlsx	CP27 si o1.xlsx	CP27 si o2.xlsx	CP27 si q1.xlsx	CP27 si q2.xlsx	CP27 si q3.xlsx
0	1.00362	0.016037	1.00601	1.05076	0.990962	1.00922	0.997702	1.01211	0.987144	1.01082	1.01544	1.00113	0.985094	0.990852	1.0091	0.99531	0.998519	1.00286	1.00717	1.0089	1.03248	0.976141	0.997915	1.01637	0.975082	0.993574	1.00961	0.997927	1.01948
0.964	0.998638	0.013284	0.988808	0.966126	1.03463	1.00129	0.998584	0.991321	1.00375	0.989914	0.980432	0.999738	1.01756	1.01502	0.983413	1.00426	0.998272	0.999667	0.989574	0.98462	0.998732	1.00445	0.999871	0.988927	1.01179	1.00606	1.00816	1.0026	0.995644
1.928	0.997604	0.011714	1.00497	0.980789	0.97455	0.989168	1.0038	0.996372	1.00933	0.998851	1.00358	0.999062	0.998181	0.994609	1.00714	1.00061	1.00327	0.997358	1.00297	1.00614	0.967686	1.02027	1.00228	0.994029	1.01426	1.00066	0.981818	0.999572	0.983994
2.892	0.527297	0.090704	0.645332	0.589196	0.587849	0.628733	0.610243	0.331823	0.448649	0.581909	0.567611	0.370149	0.415574	0.358537	0.572175	0.606804	0.613709	0.559249	0.62471	0.620043	0.53908	0.536963	0.559824	0.531178	0.455416	0.412891	0.458016	0.490888	0.520465
3.856	0.612462	0.089486	0.708466	0.765983	0.676484	0.691134	0.677446	0.431384	0.552981	0.660853	0.672254	0.450094	0.474427	0.457553	0.662778	0.656082	0.679314	0.618166	0.686745	0.699409	0.615123	0.652544	0.65612	0.622836	0.523181	0.507022	0.551949	0.600225	0.585908
4.82	0.665626	0.095526	0.783696	0.819006	0.725913	0.757009	0.770636	0.471096	0.580269	0.708865	0.695899	0.479529	0.515115	0.513464	0.6788	0.665923	0.735281	0.679629	0.760604	0.745236	0.690531	0.71648	0.711917	0.708517	0.617273	0.558817	0.588111	0.63672	0.657561
5.784	0.70391	0.088454	0.794926	0.900403	0.76756	0.774621	0.790367	0.533233	0.62259	0.733885	0.739425	0.538197	0.567518	0.577731	0.69006	0.702592	0.7522	0.709251	0.773011	0.775986	0.724834	0.729553	0.78399	0.756712	0.681819	0.605894	0.647051	0.642558	0.689598
6.748	0.733156	0.092534	0.82021	0.917404	0.815088	0.827682	0.855406	0.556508	0.65236	0.76943	0.793194	0.578665	0.586219	0.594711	0.709726	0.742359	0.768983	0.739584	0.789401	0.804667	0.736489	0.795449	0.804514	0.775588	0.701213	0.62842	0.66172	0.669281	0.700942
7.712	0.761076	0.091311	0.836099	0.929027	0.843753	0.839266	0.883603	0.570227	0.694839	0.812833	0.822729	0.591251	0.634276	0.627096	0.703007	0.770513	0.795771	0.759346	0.822158	0.834868	0.779607	0.844148	0.82542	0.788012	0.753908	0.669172	0.676913	0.718282	0.722926
8.676	0.7849	0.08756	0.870281	0.949722	0.846016	0.837837	0.90562	0.619277	0.719272	0.829773	0.845095	0.641615	0.648015	0.653875	0.738429	0.819341	0.83796	0.776071	0.8235	0.846541	0.816419	0.823048	0.881483	0.849732	0.755287	0.68785	0.704638	0.720921	0.744678
9.64	0.799871	0.086886	0.850637	0.95938	0.867937	0.872156	0.911363	0.625437	0.745529	0.848012	0.8821	0.636173	0.673314	0.687479	0.761092	0.819172	0.850289	0.785068	0.86719	0.861434	0.820257	0.856285	0.894278	0.821912	0.768716	0.697126	0.715293	0.768283	0.750592
10.604	0.807337	0.088261	0.83788	0.912582	0.897676	0.894231	0.907722	0.625018	0.757569	0.886086	0.891268	0.654946	0.663653	0.671722	0.760557	0.816643	0.828878	0.790847	0.891592	0.894383	0.81227	0.853833	0.932612	0.832814	0.773106	0.720847	0.733368	0.750983	0.805012
11.569	0.818769	0.082298	0.857164	0.948358	0.881271	0.877108	0.923498	0.631333	0.754992	0.882918	0.898786	0.674625	0.693197	0.697376	0.798415	0.842168	0.842227	0.831632	0.872084	0.898289	0.809412	0.859523	0.912303	0.84954	0.805542	0.73113	0.73425	0.783257	0.816375
12.533	0.834254	0.083767	0.839233	0.976073	0.960537	0.924246	0.914324	0.671726	0.778842	0.886219	0.887267	0.687725	0.701698	0.698753	0.792546	0.868531	0.842789	0.842189	0.889731	0.917478	0.839982	0.872214	0.930819	0.873086	0.799787	0.781697	0.746252	0.79275	0.80837
13.497	0.84377	0.080907	0.872574	0.906471	0.990372	0.922965	0.93853	0.667495	0.792577	0.905483	0.901372	0.703273	0.726707	0.706134	0.803343	0.876787	0.867283	0.844282	0.898683	0.885117	0.867105	0.903747	0.932792	0.887595	0.7939	0.757665	0.801583	0.818302	0.809657
14.461	0.855563	0.073284	0.860165	0.991929	0.993676	0.919432	0.92593	0.711168	0.816201	0.900761	0.9134	0.747417	0.758029	0.740792	0.797993	0.879968	0.838167	0.846275	0.921338	0.914143	0.859931	0.881129	0.921041	0.89994	0.844435	0.793127	0.802833	0.789369	0.831619
15.425	0.857379	0.079072	0.831009	0.943328	1.01056	0.923492	0.975933	0.705004	0.831673	0.922383	0.944422	0.69663	0.756744	0.736971	0.809012	0.857863	0.862904	0.878556	0.902219	0.912196	0.868933	0.911017	0.909279	0.893227	0.826884	0.791966	0.78787	0.825436	0.833723
16.389	0.868494	0.073143	0.826399	0.96001	0.993489	0.975465	0.966963	0.747367	0.83017	0.918588	0.934791	0.726787	0.751118	0.755635	0.822028	0.8707	0.871509	0.891107	0.910325	0.921663	0.879819	0.936944	0.913034	0.886315	0.847676	0.802011	0.825603	0.836178	0.847639
17.353	0.874303	0.067585	0.83733	0.888353	1.01471	0.928879	0.977413	0.744158	0.893967	0.914753	0.939371	0.771945	0.749761	0.762603	0.847536	0.842302	0.887886	0.879277	0.922169	0.929869	0.895701	0.922339	0.950876	0.891988	0.841898	0.843902	0.828508	0.86704	0.831643
18.317	0.88342	0.065261	0.815955	0.955065	0.997995	0.98734	0.983502	0.7786	0.87239	0.935594	0.960188	0.759814	0.793095	0.805412	0.851773	0.850861	0.8976	0.901587	0.932356	0.918874	0.898441	0.911007	0.926488	0.881234	0.8435	0.835974	0.844874	0.887873	0.82494

## Sheet: Figure S1C
	FRAP on H1f1 GFP expressing cells after con and CFDP1 siRNA
	Time (s)	Con siRNA		Time (s)	CFDP1 siRNA
	0	1.00352		0	1.00593
	0.954	1.0019		0.97	0.995001
	1.908	0.994478		1.939	0.998851
	2.861	0.462969		2.909	0.580818
	3.815	0.567141		3.879	0.659215
	4.769	0.64201		4.848	0.714657
	5.723	0.67564		5.818	0.746338
	6.676	0.729052		6.788	0.778945
	7.63	0.740423		7.757	0.807889
	8.584	0.78076		8.727	0.832233
	9.538	0.779175		9.697	0.848179
	10.492	0.790117		10.666	0.860455
	11.445	0.824482		11.636	0.864666
	12.399	0.836498		12.606	0.881213
	13.353	0.837557		13.575	0.891101
	14.307	0.845023		14.545	0.891294
	15.261	0.843282		15.515	0.898874
	16.214	0.848464		16.484	0.909188
	17.168	0.857752		17.454	0.908784
	18.122	0.858558		18.424	0.916797
