# Supplementary material for: CFDP1 regulates the stability of pericentric heterochromatin thereby affecting RAN GTPase activity and mitotic spindle formation
Source: PLoS Biol. 2024 Apr 17;22(4):e3002574. doi: 10.1371/journal.pbio.3002574 (PMC11023358; doi:10.1371/journal.pbio.3002574)
Supplement: S1 Table — (XLSX) [file pbio.3002574.s005.xlsx]

## Sheet: Sheet1
	S1 Table
	GENE ONTOLOGY ENRICHMENT FOR CFDP1 BOUND PEAKS IN NIH3T3 CELLS
	P-value	Log P-value	Annotation	Ann Group	#features	Coverage(bp)	AvgFeatureSize[ref=549]	Overlap(#peaks)	Overlap(bp)	Expected Overlap(bp, gsize=2.00e+09)	Log Ratio Enrichment	Log P-value(+ underrepresented)	P-value
	1e-232	-533.24	TCCAn|Simple_repeat|Simple_repeat	repeats	3648	396852	108	289	76614	700	4.7	-533.24	2.61e-232
	1e-228	-523.36	TGGAn|Simple_repeat|Simple_repeat	repeats	3731	409650	109	261	75815	723	4.65	-523.36	5.09e-228
	1e-92	-210.16	Simple_repeat|Simple_repeat	repeats	1015643	58263628	57	1673	284938	102892	1.02	-210.16	5.35e-92
	1e-92	-210.16	Simple_repeat	repeats	1015643	58263628	57	1673	284938	102892	1.02	-210.16	5.35e-92
	6.36e-29	-64.93	TGGGn|Simple_repeat|Simple_repeat	repeats	1078	69558	64	58	10028	122	4.41	-64.93	6.36e-29
	2.57e-21	-47.41	CCCAn|Simple_repeat|Simple_repeat	repeats	1172	68557	58	48	8141	121	4.21	-47.41	2.57e-21
	4.03e-14	-30.84	coding	basic	391329	41605475	106	646	125459	73474	0.54	-30.84	4.03e-14
	3.39e-11	-24.11	GGTTGn|Simple_repeat|Simple_repeat	repeats	139	8003	57	25	2798	14	5.3	-24.11	3.39e-11
	7.05e-11	-23.38	exons	basic	490568	69980166	142	764	178995	123583	0.37	-23.38	7.05e-11
	6.47e-09	-18.86	protein-coding	basic	474538	64982913	136	723	162012	114758	0.34	-18.86	6.47e-09
	1.3e-07	-15.85	CAAACn|Simple_repeat|Simple_repeat	repeats	2703	116146	42	37	4077	205	2.99	-15.85	1.3e-07
	5.76e-07	-14.37	RMER12C|LTR|ERVK	repeats	4954	925464	186	98	8663	1634	1.67	-14.37	5.76e-07
	1.55e-06	-13.38	CAACCn|Simple_repeat|Simple_repeat	repeats	116	7230	62	22	2077	12	5.15	-13.38	1.55e-06
	2.46e-06	-12.91	rRNA	basic	71	8762	123	2	2071	15	4.93	-12.91	2.46e-06
	5.96e-06	-12.03	CCAAn|Simple_repeat|Simple_repeat	repeats	2571	134756	52	23	3588	237	2.72	-12.03	5.96e-06
	4.25e-06	12.37	Lx7|LINE|L1	repeats	40190	16231071	403	50	12749	28663	-0.81	12.37	4.25e-06
	2.48e-06	12.91	DNA	repeats	163077	29238392	179	214	29210	51634	-0.57	12.91	2.48e-06
	1.23e-06	13.61	Low_complexity|Low_complexity	repeats	386539	20019739	51	292	16930	35354	-0.74	13.61	1.23e-06
	1.23e-06	13.61	Low_complexity	repeats	386539	20019739	51	292	16930	35354	-0.74	13.61	1.23e-06
	9.08e-07	13.91	MERVL-int|LTR|ERVL	repeats	2600	4317333	1660	0	0	7624	-8.94	13.91	9.08e-07
	7.57e-07	14.09	B2_Mm2|SINE|B2	repeats	90007	13833615	153	83	8904	24429	-1.01	14.09	7.57e-07
	3.19e-07	14.96	L1_Mur3|LINE|L1	repeats	27399	12733383	464	26	7389	22486	-1.11	14.96	3.19e-07
	2.35e-08	17.56	L1_Mus2|LINE|L1	repeats	21079	15938537	756	25	9377	28147	-1.1	17.56	2.35e-08
	1.52e-09	20.3	SINE|Alu	repeats	574557	66979531	116	705	74650	118284	-0.46	20.3	1.52e-09
	5.18e-11	23.68	LTR|ERV1	repeats	71980	31319358	435	107	23616	55309	-0.85	23.68	5.18e-11
	3.72e-12	26.32	SINE|B2	repeats	372923	59411092	159	438	57940	104919	-0.59	26.32	3.72e-12
	2.18e-14	31.45	SINE	repeats	1533009	202829822	132	1787	262281	358194	-0.31	31.45	2.18e-14
	7.45e-17	37.14	LTR|ERVK	repeats	319317	130486742	408	629	146427	230437	-0.45	37.14	7.45e-17
	2.31e-17	38.31	IAPEz-int|LTR|ERVK	repeats	7319	11864165	1621	0	0	20951	-9.95	38.31	2.31e-17
	5.4e-18	39.76	L1_Mus1|LINE|L1	repeats	27252	21996669	807	26	6767	38845	-1.75	39.76	5.4e-18
	1.52e-18	41.03	L1_Mus3|LINE|L1	repeats	48489	36693321	756	62	20490	64799	-1.15	41.03	1.52e-18
	6.88e-20	44.12	L1Md_F3|LINE|L1	repeats	16146	14860651	920	7	846	26243	-3.43	44.12	6.88e-20
	4.7e-20	44.51	introns	basic	375078	968114867	2581	2929	1510104	1709674	-0.12	44.51	4.7e-20
	4.94e-30	67.48	LTR	repeats	972593	318060098	327	1643	387956	561688	-0.37	67.48	4.94e-30
	9.49e-45	101.37	L1Md_A|LINE|L1	repeats	16844	32671406	1939	4	880	57697	-4.18	101.37	9.49e-45
	1e-60	137.98	L1Md_T|LINE|L1	repeats	23688	48668239	2054	15	2784	85947	-3.43	137.98	1.2e-60
	1e-75	172.38	L1Md_F2|LINE|L1	repeats	64898	74017535	1140	42	11651	130713	-2.42	172.38	1.36e-75
	1e-82	188.82	centromeres	basic	20	57800000	2890000	0	0	102073	-11.53	188.82	9.9e-83
	1e-112	256.44	gaps	basic	686	78088274	113831	2	99	137902	-7.24	256.44	4.28e-112
	1e-239	548.97	LINE	repeats	989393	547436765	553	1324	376285	966764	-0.94	548.97	3.84e-239
	1e-244	560.58	LINE|L1	repeats	905176	534542681	590	1143	354139	943993	-0.98	560.58	3.5e-244
	1e-779	1792.58	intergenic	basic	18319	1659160091	90570	3279	1783436	2930049	-0.5	1792.58	0
