# Supplementary material for: CFDP1 regulates the stability of pericentric heterochromatin thereby affecting RAN GTPase activity and mitotic spindle formation
Source: PLoS Biol. 2024 Apr 17;22(4):e3002574. doi: 10.1371/journal.pbio.3002574 (PMC11023358; doi:10.1371/journal.pbio.3002574)
Supplement: S2 Data — (XLSX) [file pbio.3002574.s013.xlsx]

## Sheet: Figure 4D 4F
Sample Vol	20
Lid Temp	105
Protocol File Name	Protocol 082615.prcl
Plate Setup File Name	Quick Plate_96 wells_SYBR Only.pltd
Base Serial Number	CC011605
Optical Head Serial Number	785BR4368
CFX Manager Version	3.1.1517.0823.
Well group	All Wells
Amplification step	3
Melt step	5
Well				Cq						avg	stdev
A01	maj SAT blue	con si	H2az	10.6959		2.76667	-7.92927	0.00410253	0.410253	0.414505	0.00601295
A02				10.6663		2.76667	-7.89967	0.00418757	0.418757
A03			H2a	9.44022		2.76667	-6.67355	0.0097963	0.97963	0.961427	0.0257434
A04				9.49486		2.76667	-6.72818	0.00943224	0.943224
A05			K9me3	8.02458		2.76667	-5.25791	0.0261343	2.61343	2.46774	0.206041
A06				8.19513		2.76667	-5.42846	0.0232205	2.32205
A07			beads	18.195		2.76667	-15.4284	2.26779e-05	0.00226779	0.00219018	0.000109752
A08				18.2973		2.76667	-15.5306	2.11257e-05	0.00211257
A09		cp27 si	H2az	10.746		2.59142	-8.15459	0.00350932	0.350932	0.26899	0.115883
A10				11.6538		2.59142	-9.06237	0.00187048	0.187048
A11			H2a	9.47112		2.59142	-6.87971	0.00849185	0.849185	0.772908	0.107871
A12				9.7568		2.59142	-7.16539	0.00696632	0.696632
B01			K9me3	8.20607		2.59142	-5.61466	0.0204089	2.04089	1.74163	0.423218
B02				8.70683		2.59142	-6.11542	0.0144237	1.44237
B03			beads	18.2056		2.59142	-15.6142	1.99367e-05	0.00199367	0.00200503	1.6068e-05
B04				18.1893		2.59142	-15.5979	2.01639e-05	0.00201639
B05		Srcap si	H2az	12.7082		2.26525	-10.443	0.000718381	0.0718381	0.0648419	0.00989423
B06				13.0208		2.26525	-10.7555	0.000578456	0.0578456
B07			H2a	11.2345		2.26525	-8.96924	0.00199522	0.199522	0.195654	0.00546943
B08				11.2915		2.26525	-9.02628	0.00191787	0.191787
B09			K9me3	9.66941		2.26525	-7.40416	0.00590372	0.590372	0.581451	0.0126171
B10				9.71369		2.26525	-7.44844	0.00572529	0.572529
B11			beads	19.4786		2.26525	-17.2134	6.58053e-06	0.000658053	0.000665768	1.09119e-05
B12				19.4452		2.26525	-17.1799	6.73484e-06	0.000673484
C01		input	con si	6.10277	6.08667	2.76667	-3.33609	0.099023	9.9023
C02				6.07058			-6.07058	0.014879	1.4879
C03			cp27 si	5.99418	5.91142	2.59142	-3.40276	0.0945512	9.45512
C04				5.82866			-5.82866	0.0175954	1.75954
C05			srcap si	5.61511	5.58525	2.26525	-3.34986	0.0980827	9.80827
C06				5.5554			-5.5554	0.0212647	2.12647
C07	maj SAT white	con si	H2az	10.4767		2.5215	-7.95518	0.00402952	0.402952	0.396994	0.00842616
C08				10.52		2.5215	-7.99849	0.00391035	0.391035
C09			H2a	9.32084		2.5215	-6.79934	0.00897828	0.897828	0.894376	0.00488277
C10				9.33198		2.5215	-6.81048	0.00890923	0.890923
C11			K9me3	8.00623		2.5215	-5.48473	0.0223322	2.23322	2.24095	0.0109298
C12				7.99628		2.5215	-5.47478	0.0224867	2.24867
D01			beads	18.4644		2.5215	-15.9429	1.58743e-05	0.00158743	0.0016925	0.000148587
D02				18.2851		2.5215	-15.7636	1.79757e-05	0.00179757
D03		cp27 si	H2az	11.232		2.3162	-8.91579	0.00207053	0.207053	0.176711	0.042909
D04				11.7324		2.3162	-9.41616	0.0014637	0.14637
D05			H2a	9.4137		2.3162	-7.09749	0.007302	0.7302	0.734867	0.00659933
D06				9.39537		2.3162	-7.07917	0.00739533	0.739533
D07			K9me3	8.46266		2.3162	-6.14645	0.0141167	1.41167	1.29974	0.158293
D08				8.71176		2.3162	-6.39555	0.0118781	1.18781
D09			beads	18.1986		2.3162	-15.8823	1.65553e-05	0.00165553	0.00160113	7.69392e-05
D10				18.2966		2.3162	-15.9804	1.54672e-05	0.00154672
D11		Srcap si	H2az	13.1512		2.13059	-11.0206	0.000481351	0.0481351	0.047273	0.00121923
D12				13.2038		2.13059	-11.0732	0.000464109	0.0464109
E01			H2a	11.3057		2.13059	-9.17513	0.00172986	0.172986	0.178231	0.00741754
E02				11.2208		2.13059	-9.0902	0.00183476	0.183476
E03			K9me3	9.63389		2.13059	-7.5033	0.00551165	0.551165	0.566409	0.0215581
E04				9.55622		2.13059	-7.42563	0.00581653	0.581653
E05			beads	19.4711		2.13059	-17.3405	6.02546e-06	0.000602546	0.000603023	6.74363e-07
E06				19.4688		2.13059	-17.3382	6.03499e-06	0.000603499
E07		input	con si	5.67681	5.8415	2.5215	-3.15531	0.112242	11.2242
E08				6.00618			-6.00618	0.0155582	1.55582
E09			cp27 si	5.54561	5.6362	2.3162	-3.22941	0.106623	10.6623
E10				5.7268			-5.7268	0.0188826	1.88826
E11			srcap si	5.41697	5.45059	2.13059	-3.28638	0.102495	10.2495
E12				5.48421			-5.48421	0.0223402	2.23402
F01	min SAT	con si	H2az	15.7782		8.44235	-7.33587	0.00618988	0.618988	0.613153	0.00825171
F02				15.8057		8.44235	-7.36333	0.00607318	0.607318
F03			H2a	15.3713		8.44235	-6.92896	0.00820684	0.820684	0.833936	0.0187418
F04				15.3255		8.44235	-6.8831	0.00847189	0.847189
F05			K9me3	14.9505		8.44235	-6.50813	0.0109864	1.09864	1.12179	0.0327306
F06				14.8909		8.44235	-6.4486	0.0114493	1.14493
F07			beads	23.7968		8.44235	-15.3545	2.38693e-05	0.00238693	0.00252399	0.000193828
F08				23.64		8.44235	-15.1976	2.66104e-05	0.00266104
F09		cp27 si	H2az	16.44		8.72265	-7.71735	0.00475166	0.475166	0.455752	0.0274553
F10				16.563		8.72265	-7.84034	0.00436338	0.436338
F11			H2a	15.4063		8.72265	-6.6836	0.00972827	0.972827	0.974779	0.0027612
F12				15.4005		8.72265	-6.67782	0.00976732	0.976732
G01			K9me3	15.0744		8.72265	-6.35176	0.0122442	1.22442	1.1431	0.114998
G02				15.28		8.72265	-6.55736	0.0106178	1.06178
G03			beads	23.5773		8.72265	-14.8546	3.37531e-05	0.00337531	0.00321636	0.000224782
G04				23.72		8.72265	-14.9973	3.05742e-05	0.00305742
G05		Srcap si	H2az	18.431		8.44684	-9.98418	0.00098733	0.098733	0.100746	0.00284651
G06				18.3734		8.44684	-9.92653	0.00102759	0.102759
G07			H2a	17.3075		8.44684	-8.8607	0.00215112	0.215112	0.212652	0.0034782
G08				17.3409		8.44684	-8.89407	0.00210193	0.210193
G09			K9me3	15.8697		8.44684	-7.42286	0.00582769	0.582769	0.554798	0.0395574
G10				16.0153		8.44684	-7.56846	0.00526827	0.526827
G11			beads	24.9992		8.44684	-16.5523	1.04053e-05	0.00104053	0.00111609	0.000106865
G12				24.8035		8.44684	-16.3567	1.19166e-05	0.00119166
H01		input	con si	11.6309	11.7624	8.44235	-3.18853	0.109688	10.9688
H02				11.8938
H03			cp27 si	12.0174	12.0427	8.72265
H04				12.0679
H05			srcap si	11.871	11.7668	8.44684
H06				11.6626
						RATIO
				avg	stdev	x/h2a
	maj SAT blue	con si	H2az	0.414505	0.00601295	0.431135		maj SAT blue	H2az	con si	0.414505	0.00601295
			H2a	0.961427	0.0257434					cp27 si	0.26899	0.115883
			K9me3	2.46774	0.206041	2.56675				Srcap si	0.0648419	0.00989423
			beads	0.00219018	0.000109752
									H2a	con si	0.961427	0.0257434
		cp27 si	H2az	0.26899	0.115883	0.348023				cp27 si	0.772908	0.107871
			H2a	0.772908	0.107871					Srcap si	0.195654	0.00546943
			K9me3	1.74163	0.423218	2.25334
			beads	0.00200503	1.6068e-05				K9me3	con si	2.46774	0.206041
										cp27 si	1.74163	0.423218
		Srcap si	H2az	0.0648419	0.00989423	0.33141				Srcap si	0.581451	0.0126171
			H2a	0.195654	0.00546943
			K9me3	0.581451	0.0126171	2.97183			beads	con si	0.00219018	0.000109752
			beads	0.000665768	1.09119e-05					cp27 si	0.00200503	1.6068e-05
										Srcap si	0.000665768	1.09119e-05
	maj SAT white	con si	H2az	0.396994	0.00842616	0.443878		maj SAT white	H2az	con si	0.396994	0.00842616
			H2a	0.894376	0.00488277					cp27 si	0.176711	0.042909
			K9me3	2.24095	0.0109298	2.5056				Srcap si	0.047273	0.00121923
			beads	0.0016925	0.000148587
									H2a	con si	0.894376	0.00488277
		cp27 si	H2az	0.176711	0.042909	0.240467				cp27 si	0.734867	0.00659933
			H2a	0.734867	0.00659933					Srcap si	0.178231	0.00741754
			K9me3	1.29974	0.158293	1.76867
			beads	0.00160113	7.69392e-05				K9me3	con si	2.24095	0.0109298
										cp27 si	1.29974	0.158293
		Srcap si	H2az	0.047273	0.00121923	0.265235				Srcap si	0.566409	0.0215581
			H2a	0.178231	0.00741754
			K9me3	0.566409	0.0215581	3.17796			beads	con si	0.0016925	0.000148587
			beads	0.000603023	6.74363e-07					cp27 si	0.00160113	7.69392e-05
										Srcap si	0.000603023	6.74363e-07
	min SAT	con si	H2az	0.613153	0.00825171			min SAT	H2az	con si	0.613153	0.00825171
			H2a	0.833936	0.0187418					cp27 si	0.472804	0.0515707
			K9me3	1.12179	0.0327306					Srcap si	0.100746	0.00284651
			beads	0.00252399	0.000193828
									H2a	con si	0.833936	0.0187418
		cp27 si	H2az	0.472804	0.0515707					cp27 si	0.974779	0.0027612
			H2a	0.974779	0.0027612					Srcap si	0.212652	0.0034782
			K9me3	1.1431	0.114998
			beads	0.00321636	0.000224782				K9me3	con si	1.12179	0.0327306
										cp27 si	1.1431	0.114998
		Srcap si	H2az	0.100746	0.00284651					Srcap si	0.554798	0.0395574
			H2a	0.212652	0.0034782
			K9me3	0.554798	0.0395574				beads	con si	0.00252399	0.000193828
			beads	0.00111609	0.000106865					cp27 si	0.00321636	0.000224782
										Srcap si	0.00111609	0.000106865
					maj SAT white	H2az	con si	0.396994	0.00842616
							cp27 si	0.176711	0.042909
							Srcap si	0.047273	0.00121923
						K9me3	con si	2.24095	0.0109298
							cp27 si	1.29974	0.158293
							Srcap si	0.566409	0.0215581
						beads	con si	0.0016925	0.000148587
							cp27 si	0.00160113	7.69392e-05
							Srcap si	0.000603023	6.74363e-07
					min SAT	H2az	con si	0.613153	0.00825171
							cp27 si	0.472804	0.0515707
							Srcap si	0.100746	0.00284651
						K9me3	con si	1.12179	0.0327306
							cp27 si	1.1431	0.114998
							Srcap si	0.554798	0.0395574
						beads	con si	0.00252399	0.000193828
							cp27 si	0.00321636	0.000224782
							Srcap si	0.00111609	0.000106865
					mTLC	H2az	con si	0.783704	0.182345
							cp27 si	0.502704	0.142548
							Srcap si	0.104481	0.00289128		min SAT	H2az	con si	0.613153	0.00825171	P
													cp27 si	0.455752	0.0274553	0.0162
						H2a	con si	1.72433	0.0256763				Srcap si	0.100746	0.00284651	0.0001
							cp27 si	1.25688	0.0521612
							Srcap si	0.265102	0.00866658		maj SAT white	H2az	con si	0.396994	0.00842616
													cp27 si	0.176711	0.042909	0.0191
						K9me3	con si	1.12603	0.0941258				Srcap si	0.047273	0.00121923	0.0003
							cp27 si	1.44267	0.13484
							Srcap si	0.307607	0.0246746		mTLC	H2az	con si	0.783704	0.0823452
													cp27 si	0.502704	0.0425475	0.0503
						beads	con si	0.00311481	0.000149688				Srcap si	0.104481	0.00289128	0.0073
							cp27 si	0.00299523	0.000114105
							Srcap si	0.000776067	3.768e-05		m LINE1 ORF1	H2az	con si	0.85076	0.0374752
													cp27 si	0.407239	0.0684738	0.0151
													Srcap si	0.119302	0.00959788	0.0014
					m LINE1 ORF1	H2az	con si	0.85076	0.0374752
							cp27 si	0.407239	0.0684738
							Srcap si	0.119302	0.00959788
						H2a	con si	1.10976	0.0147016
							cp27 si	1.0653	0.00363956
							Srcap si	0.330284	0.0188937
						K9me3	con si	1.23504	0.042594
							cp27 si	0.839701	0.0844896		min SAT	K9me3	con si	1.12179	0.0327306
							Srcap si	0.464857	0.00280598				cp27 si	1.1431	0.114998
													Srcap si	0.554798	0.0395574
						beads	con si	0.00301487	0.000346925			beads	con si	0.00252399	0.000193828
							cp27 si	0.00298724	8.20612e-05				cp27 si	0.00321636	0.000224782
							Srcap si	0.00130452	5.76533e-05				Srcap si	0.00111609	0.000106865
											maj SAT white	K9me3	con si	2.24095	0.0109298
													cp27 si	1.29974	0.108293	P-0.0066
													Srcap si	0.566409	0.0215581	P=0.0001
					mSINE	H2az	con si	1.30914	0.0993587			beads	con si	0.0016925	0.000148587
							cp27 si	0.939101	0.378002				cp27 si	0.00160113	7.69392e-05
							Srcap si	0.21211	0.0159863				Srcap si	0.000603023	6.74363e-07
						H2a	con si	1.82558	0.22458
							cp27 si	1.6754	0.147169
							Srcap si	0.597188	0.0304948
						K9me3	con si	1.29995	0.0513064
							cp27 si	0.947844	0.10514
							Srcap si	0.577014	0.0890525
						beads	con si	0.00383442	0.00132428
							cp27 si	0.00879584	0.000435927
							Srcap si	0.00241143	0.000183882

## Sheet: Figure 4E
Sample Vol	20
Lid Temp	105
Protocol File Name	Protocol 082615.prcl
Plate Setup File Name	Quick Plate_96 wells_SYBR Only.pltd
Base Serial Number	CC011605
Optical Head Serial Number	785BR4368
CFX Manager Version	3.1.1517.0823.
Well group	All Wells
Amplification step	3
Melt step	5
Well				Cq						avg	stdev
A01	TLC	con si	FLAG	26.7845		16.2974	-10.4871	0.000696712	0.0696712	0.0710343	0.00192772
A02				26.7291		16.2974	-10.4318	0.000723974	0.0723974
A03			H2az	24.019		16.2974	-7.72166	0.0047375	0.47375	0.448351	0.0359195
A04				24.1826		16.2974	-7.88529	0.00422952	0.422952
A05		Cp27 si	FLAG	27.4203		16.548	-10.8723	0.000533462	0.0533462	0.050087	0.0046092
A06				27.6083		16.548	-11.0603	0.000468278	0.0468278
A07			H2az	24.3328		16.548	-7.78486	0.00453445	0.453445	0.4809	0.0388279
A08				24.1679		16.548	-7.61995	0.00508356	0.508356
A09			beads	31.3859		16.548	-14.838	3.41454e-05	0.00341454	0.00304361	0.000524567
A10				31.7393		16.548	-15.1913	2.67269e-05	0.00267269
A11		Srcap si	FLAG	27.6549		16.3046	-11.3503	0.000383016	0.0383016	0.0381536	0.00020939
A12				27.6661		16.3046	-11.3615	0.000380055	0.0380055
B01			H2az	24.6154		16.3046	-8.31074	0.00314934	0.314934	0.336845	0.0309867
B02				24.4274		16.3046	-8.12278	0.00358756	0.358756
B03			beads	31.4556		16.3046	-15.151	2.74845e-05	0.00274845	0.00276945	2.9699e-05
B04				31.4338		16.3046	-15.1291	2.79045e-05	0.00279045
B05		Input	Con	19.7319	19.6174	16.2974	-3.43454	0.0924915	9.24915
B06				19.5028	19.7175		-19.5028	1.34607e-06	0.000134607
B07			Cp27	19.9321	19.868	16.548	-3.38411	0.0957815	9.57815
B08				19.8039	19.7301		-19.8039	1.09255e-06	0.000109255
B09			Srcap	19.6563	19.6246	16.3046	-3.35171	0.0979566	9.79566
B10				19.5929	18.964		-19.5929	1.26459e-06	0.000126459
B11	min SAT	con si	FLAG	18.3352		7.46162	-10.8735	0.000533016	0.0533016	0.0541001	0.00112933
B12				18.2926		7.46162	-10.8309	0.000548987	0.0548987
C01			H2az	15.6347		7.46162	-8.1731	0.0034646	0.34646	0.354336	0.0111382
C02				15.5706		7.46162	-8.10895	0.00362212	0.362212
C03		Cp27 si	FLAG	19.2763		7.65476	-11.6215	0.000317374	0.0317374	0.0317058	4.47549e-05
C04				19.2792		7.65476	-11.6244	0.000316741	0.0316741
C05			H2az	15.6094		7.65476	-7.95467	0.00403094	0.403094	0.420015	0.0239299
C06				15.4931		7.65476	-7.83836	0.00436936	0.436936
C07			beads	23.1109		7.65476	-15.4561	2.2246e-05	0.0022246	0.00223233	1.09334e-05
C08				23.1009		7.65476	-15.4461	2.24006e-05	0.00224006
C09		Srcap si	FLAG	19.4493		7.4986	-11.9507	0.000252635	0.0252635	0.0266229	0.00192244
C10				19.3018		7.4986	-11.8032	0.000279822	0.0279822
C11			H2az	16.2184		7.4986	-8.71981	0.00237179	0.237179	0.255055	0.0252811
C12				16.0158		7.4986	-8.51725	0.00272931	0.272931
D01			beads	23.2361		7.4986	-15.7375	1.83039e-05	0.00183039	0.00198704	0.000221547
D02				23.0081		7.4986	-15.5095	2.1437e-05	0.0021437
D03		Input	Con	10.8666	10.7816	7.46162	-3.40495	0.0944081	9.44081
D04				10.6967	10.8534		-10.6967	0.000602533	0.0602533
D05			Cp27	11.0101	10.9748	7.65476	-3.35535	0.0977101	9.77101
D06				10.9394	10.8648		-10.9394	0.000509226	0.0509226
D07			Srcap	10.7902	10.8186	7.4986	-3.29158	0.102126	10.2126
D08				10.847	11.9049		-10.847	0.0005429	0.05429
D09	maj SAT	con si	FLAG	12.9627		1.48374	-11.479	0.000350327	0.0350327	0.0345287	0.000712682
D10				13.0049		1.48374	-11.5211	0.000340248	0.0340248
D11			H2az	10.052		1.48374	-8.56823	0.00263455	0.263455	0.258101	0.00757192
D12				10.1118		1.48374	-8.62809	0.00252746	0.252746
E01		Cp27 si	FLAG	13.9353		1.68893	-12.2464	0.000205815	0.0205815	0.0205435	5.36296e-05
E02				13.9406		1.68893	-12.2517	0.000205056	0.0205056
E03			H2az	10.188		1.68893	-8.49906	0.00276394	0.276394	0.275395	0.00141143
E04				10.1985		1.68893	-8.50952	0.00274397	0.274397
E05			beads	17.5404		1.68893	-15.8515	1.6913e-05	0.0016913	0.00168129	1.41554e-05
E06				17.5576		1.68893	-15.8687	1.67129e-05	0.00167129
E07		Srcap si	FLAG	13.527		1.4938	-12.0332	0.000238585	0.0238585	0.0224068	0.00205296
E08				13.7142		1.4938	-12.2204	0.000209552	0.0209552
E09			H2az	10.2982		1.4938	-8.80438	0.00223676	0.223676	0.225452	0.00251231
E10				10.2754		1.4938	-8.78164	0.00227228	0.227228
E11			beads	17.3329		1.4938	-15.8391	1.70591e-05	0.00170591	0.00169875	1.0124e-05
E12				17.3451		1.4938	-15.8513	1.69159e-05	0.00169159
F01		Input	Con	4.7463	4.80374	1.48374	-3.26256	0.104201	10.4201
F02				4.86118	4.96119		-4.86118	0.0344065	3.44065
F03			Cp27	5.0612	5.00893	1.68893	-3.37226	0.0965712	9.65712
F04				4.95667	4.91599		-4.95667	0.0322028	3.22028
F05			Srcap	4.87531	4.8138	1.4938	-3.38151	0.0959539	9.59539
F06				4.75228	12.193		-4.75228	0.0371039	3.71039
F07	LINE1 ORF1	con si	FLAG	19.6336		9.21654	-10.4171	0.000731371	0.0731371	0.0726645	0.000668261
F08				19.6524		9.21654	-10.4359	0.00072192	0.072192
F09			H2az	16.9587		9.21654	-7.74219	0.00467054	0.467054	0.458467	0.0121438
F10				17.0128		9.21654	-7.79624	0.0044988	0.44988
F11		Cp27 si	FLAG	20.6064		9.63119	-10.9752	0.000496745	0.0496745	0.0477395	0.00273644
F12				20.7234		9.63119	-11.0922	0.000458045	0.0458045
G01			H2az	17.1383		9.63119	-7.50708	0.00549722	0.549722	0.543916	0.00821197
G02				17.1691		9.63119	-7.53789	0.00538109	0.538109
G03			beads	24.4696		9.63119	-14.8385	3.41335e-05	0.00341335	0.0032957	0.000166384
G04				24.5727		9.63119	-14.9415	3.17805e-05	0.00317805
G05		Srcap si	FLAG	20.4251		9.60046	-10.8246	0.0005514	0.05514	0.0554403	0.000424712
G06				20.4094		9.60046	-10.809	0.000557406	0.0557406
G07			H2az	17.3455		9.60046	-7.74507	0.00466123	0.466123	0.462088	0.00570711
G08				17.3707		9.60046	-7.77027	0.00458052	0.458052
G09			beads	24.3864		9.60046	-14.7859	3.53995e-05	0.00353995	0.00362407	0.000118962
G10				24.3194		9.60046	-14.7189	3.70819e-05	0.00370819
G11		Input	Con	12.5615	12.5365	9.21654
G12				12.5115	12.7046
H01			Cp27	12.8976	12.9512	9.63119
H02				13.0048	12.9837
H03			Srcap	12.9625	12.9205	9.60046
H04				12.8784	12.8784
				avg	stdev
	TLC	con si	FLAG	0.0710343	0.00192772		TLC	FLAG	con si	0.0710343	0.00192772	FLAG
			H2az	0.448351	0.0359195				Cp27 si	0.050087	0.0046092	FLAG
									Srcap si	0.0381536	0.00020939	FLAG
		Cp27 si	FLAG	0.050087	0.0046092
			H2az	0.4809	0.0388279			H2az	con si	0.448351	0.0359195	H2az
			beads	0.00304361	0.000524567				Cp27 si	0.4809	0.0388279	H2az
									Srcap si	0.336845	0.0309867	H2az
		Srcap si	FLAG	0.0381536	0.00020939
			H2az	0.336845	0.0309867			beads	con si
			beads	0.00276945	2.9699e-05				Cp27 si	0.00304361	0.000524567	beads
									Srcap si	0.00276945	2.9699e-05	beads
	min SAT	con si	FLAG	0.0541001	0.00112933
			H2az	0.354336	0.0111382		min SAT	FLAG	con si	0.0541001	0.00112933	FLAG
									Cp27 si	0.0317058	4.47549e-05	FLAG
		Cp27 si	FLAG	0.0317058	4.47549e-05				Srcap si	0.0266229	0.00192244	FLAG
			H2az	0.420015	0.0239299
			beads	0.00223233	1.09334e-05			H2az	con si	0.354336	0.0111382	H2az
									Cp27 si	0.420015	0.0239299	H2az
		Srcap si	FLAG	0.0266229	0.00192244				Srcap si	0.255055	0.0252811	H2az
			H2az	0.255055	0.0252811
			beads	0.00198704	0.000221547			beads	con si
									Cp27 si	0.00223233	1.09334e-05	beads
									Srcap si	0.00198704	0.000221547	beads
	maj SAT	con si	FLAG	0.0345287	0.000712682
			H2az	0.258101	0.00757192		maj SAT	FLAG	con si	0.0345287	0.000712682	FLAG
									Cp27 si	0.0205435	5.36296e-05	FLAG
		Cp27 si	FLAG	0.0205435	5.36296e-05				Srcap si	0.0224068	0.00205296	FLAG
			H2az	0.275395	0.00141143
			beads	0.00168129	1.41554e-05			H2az	con si	0.258101	0.00757192	H2az
									Cp27 si	0.275395	0.00141143	H2az
		Srcap si	FLAG	0.0224068	0.00205296				Srcap si	0.225452	0.00251231	H2az
			H2az	0.225452	0.00251231
			beads	0.00169875	1.0124e-05			beads	con si
									Cp27 si	0.00168129	1.41554e-05	beads
									Srcap si	0.00169875	1.0124e-05	beads		min SAT	FLAG	con si	0.0541001	0.00112933
																Cp27 si	0.0317058	4.47549e-05	P=0.0013
	LINE1 ORF1	con si	FLAG	0.0726645	0.000668261											Srcap si	0.0266229	0.00192244	0.0033
			H2az	0.458467	0.0121438		LINE1 ORF1	FLAG	con si	0.0726645	0.000668261	FLAG
									Cp27 si	0.0477395	0.00273644	FLAG		maj SAT	FLAG	con si	0.0345287	0.000712682
		Cp27 si	FLAG	0.0477395	0.00273644				Srcap si	0.0554403	0.000424712	FLAG				Cp27 si	0.0205435	5.36296e-05	0.0013
			H2az	0.543916	0.00821197											Srcap si	0.0224068	0.00205296	0.0157
			beads	0.0032957	0.000166384			H2az	con si	0.458467	0.0121438	H2az
									Cp27 si	0.543916	0.00821197	H2az		TLC	FLAG	con si	0.0710343	0.00192772
		Srcap si	FLAG	0.0554403	0.000424712				Srcap si	0.462088	0.00570711	H2az				Cp27 si	0.050087	0.0046092	0.0273
			H2az	0.462088	0.00570711											Srcap si	0.0381536	0.00020939	0.0017
			beads	0.00362407	0.000118962			beads	con si
									Cp27 si	0.0032957	0.000166384	beads		LINE1 ORF1	FLAG	con si	0.0726645	0.000668261
									Srcap si	0.00362407	0.000118962	beads				Cp27 si	0.0477395	0.00273644	0.0063
																Srcap si	0.0554403	0.000424712	0.0011

## Sheet: Figure 4G
Run Started	03/31/2017 16:25:03 UTC
Run Ended	03/31/2017 17:30:22 UTC
Sample Vol	20
Lid Temp	105
Protocol File Name	Protocol 082615.prcl
Plate Setup File Name	Quick Plate_96 wells_SYBR Only.pltd
Base Serial Number	CC011605
Optical Head Serial Number	785BR4368
CFX Manager Version	3.1.1517.0823.
Well group	All Wells
Amplification step	3
Melt step	5
Well						Cq
A01		white cap	min sat	con si	HP1 a	16.5971		6.0331	-10.564	0.000660551	0.0660551	0.0694515	0.00480322
A02						16.4559		6.0331	-10.4228	0.000728479	0.0728479
A03					H2az	15.3726		6.0331	-9.33951	0.00154358	0.154358	0.154189	0.000238159
A04						15.3758		6.0331	-9.34266	0.00154021	0.154021
A05					H2b	12.2214		6.0331	-6.18834	0.0137128	1.37128	1.43812	0.0945327
A06						12.0872		6.0331	-6.05413	0.0150496	1.50496
A07					no ab	23.2392		6.0331	-17.2061	6.61352e-06	0.000661352	0.000645637	2.22245e-05
A08						23.3095		6.0331	-17.2764	6.29922e-06	0.000629922
A09				Cp27 si	HP1 a	16.8027		6.10356	-10.6992	0.000601488	0.0601488	0.0625919	0.00345503
A10						16.6901		6.10356	-10.5865	0.00065035	0.065035
A11					H2az	15.2743		6.10356	-9.17074	0.00173513	0.173513	0.168785	0.00668635
A12						15.3551		6.10356	-9.25159	0.00164057	0.164057
B01					H2b	12.3616		6.10356	-6.258	0.0130663	1.30663	1.346	0.0556693
B02						12.2771		6.10356	-6.17359	0.0138536	1.38536
B03					no ab	22.4493		6.10356	-16.3457	1.20075e-05	0.00120075	0.00122645	3.63403e-05
B04						22.3888		6.10356	-16.2852	1.25214e-05	0.00125214
B05				input	consi	9.36418	9.3531	6.0331
B06						9.34202
B07					cp27si	9.44106	9.42356	6.10356
B08						9.40605
B09		white cap	maj sat	con si	HP1 a	10.7787		2.12011	-8.65863	0.00247453	0.247453	0.247478	3.63818e-05
B10						10.7784		2.12011	-8.65833	0.00247504	0.247504
B11					H2az	10.5255		2.12011	-8.40542	0.00294929	0.294929	0.289561	0.00759155
B12						10.579		2.12011	-8.45891	0.00284193	0.284193
C01					H2b	5.90681		2.12011	-3.7867	0.0724586	7.24586	7.4519	0.291376
C02						5.82702		2.12011	-3.7069	0.0765793	7.65793
C03					no ab	17.892		2.12011	-15.7718	1.78732e-05	0.00178732	0.00181318	3.65789e-05
C04						17.8508		2.12011	-15.7307	1.83905e-05	0.00183905
C05				Cp27 si	HP1 a	10.6003		1.9811	-8.6192	0.00254309	0.254309	0.249837	0.00632476
C06						10.652		1.9811	-8.67086	0.00245364	0.245364
C07					H2az	10.9298		1.9811	-8.94868	0.00202386	0.202386	0.195206	0.0101541
C08						11.036		1.9811	-9.05485	0.00188026	0.188026
C09					H2b	5.85412		1.9811	-3.87302	0.0682505	6.82505	7.3405	0.728955
C10						5.65117		1.9811	-3.67007	0.0785595	7.85595
C11					no ab	16.6782		1.9811	-14.6971	3.76464e-05	0.00376464	0.00371618	6.85429e-05
C12						16.7159		1.9811	-14.7348	3.66771e-05	0.00366771
D01				input	consi	2.32327	2.12011
D02						1.91696
D03					cp27si	2.09886	1.9811
D04						1.86335
D05		blue cap	maj sat	con si	HP1 a	10.6634		1.56532	-9.0981	0.00182473	0.182473	0.185261	0.00394193
D06						10.62		1.56532	-9.05468	0.00188048	0.188048
D07					H2az	10.4579		1.56532	-8.89257	0.00210412	0.210412	0.21182	0.00199139
D08						10.4387		1.56532	-8.87339	0.00213228	0.213228
D09					H2b	5.48704		1.56532	-3.92171	0.0659852	6.59852	6.25194	0.490131
D10						5.64715		1.56532	-4.08183	0.0590537	5.90537
D11					no ab	17.66		1.56532	-16.0947	1.42895e-05	0.00142895	0.0013766	7.40406e-05
D12						17.7698		1.56532	-16.2045	1.32424e-05	0.00132424
E01				Cp27 si	HP1 a	10.6634		1.07695	-9.58641	0.00130078	0.130078	0.134867	0.00677262
E02						10.5609		1.07695	-9.48391	0.00139656	0.139656
E03					H2az	10.9703		1.07695	-9.89336	0.00105148	0.105148	0.103863	0.00181736
E04						11.006		1.07695	-9.92907	0.00102578	0.102578
E05					H2b	5.54646		1.07695	-4.46951	0.0451381	4.51381	4.36105	0.216036
E06						5.64757		1.07695	-4.57062	0.0420829	4.20829
E07					no ab	16.4735		1.07695	-15.3965	2.31837e-05	0.00231837	0.00216127	0.000222173
E08						16.6836		1.07695	-15.6066	2.00417e-05	0.00200417
E09				input	consi	NaN
E10						1.56532
E11					cp27si	1.07475	1.07695
E12						1.07915
	min sat	con si	HP1 a	0.0694515	0.00480322		min sat	HP1	con si	0.0694515	0.00480322
			H2az	0.154189	0.000238159		P=0.2428		Cp27 si	0.0625919	0.00345503
			H2b	1.43812	0.0945327
			no ab	0.000645637	2.22245e-05			H2AZ	con si	0.154189	0.000238159
									Cp27 si	0.168785	0.00668635
		Cp27 si	HP1 a	0.0625919	0.00345503
			H2az	0.168785	0.00668635			H2B	con si	1.43812	0.0945327
			H2b	1.346	0.0556693				Cp27 si	1.346	0.0556693
			no ab	0.00122645	3.63403e-05
						Ratio x/H4
	maj sat	con si	HP1 a	0.247478	3.63818e-05	0.0332101	maj sat	HP1	con si	0.247478	3.63818e-05
			H2az	0.289561	0.00759155	0.0388574			Cp27 si	0.249837	0.00632476
			H2b	7.4519	0.291376
			no ab	0.00181318	3.65789e-05			H2AZ	con si	0.289561	0.00759155
							P=0.0089		Cp27 si	0.195206	0.0101541
		Cp27 si	HP1 a	0.249837	0.00632476	0.0340354
			H2az	0.195206	0.0101541	0.026593		H2B	con si	7.4519	0.291376
			H2b	7.3405	0.728955				Cp27 si	7.3405	0.728955
			no ab	0.00371618	6.85429e-05
	maj sat	con si	HP1 a	0.185261	0.00394193	0.0296325
			H2az	0.21182	0.00199139	0.0338806
			H2b	6.25194	0.490131
			no ab	0.0013766	7.40406e-05		maj sat	HP1	con si	0.185261	0.00394193
							P=0.0119		Cp27 si	0.134867	0.00677262
		Cp27 si	HP1 a	0.134867	0.00677262	0.0309254
			H2az	0.103863	0.00181736	0.023816		H2AZ	con si	0.21182	0.00199139
			H2b	4.36105	0.216036		P=0.0003		Cp27 si	0.103863	0.00181736
			no ab	0.00216127	0.000222173
								H2B	con si	6.25194	0.490131
									Cp27 si	4.36105	0.216036
				maj sat	HP1	con si	0.185261	0.00394193
				P=0.0119		no ab	0.0013766	7.40406e-05
						Cp27 si	0.134867	0.00677262
						no ab	0.00216127	0.000222173

## Sheet: Figure 4H
Notes
ID
Run Started	07/26/2018 17:27:35 UTC
Run Ended	07/26/2018 18:32:45 UTC
Sample Vol	20
Lid Temp	105
Protocol File Name	Protocol 082615.prcl
Plate Setup File Name	Quick Plate_96 wells_SYBR Only.pltd
Base Serial Number	CC011605
Optical Head Serial Number	785BR4368
CFX Manager Version	3.1.1517.0823.
Well group	All Wells
Amplification step	3
Melt step	5
Well				Cq						avg	stdev		Ratio		Cenpa		avg	stdev
A01	min sat	con si	cenp a	20.0673		9.52347	-10.5438	0.000669862	0.0669862	0.0666544	0.0004693		0.00464465		min sat	con si	0.0666544	0.0004693
A02				20.0817		9.52347	-10.5582	0.000663225	0.0663225							beads	0.0114702	0.00106934
A03			h2az	16.1713		9.52347	-6.64788	0.00997217	0.997217	1.01179	0.0206078		0.0705041			cp27 si	0.0225979	0.000373753		P=0.0001
A04				16.1298		9.52347	-6.60632	0.0102636	1.02636							beads	0.00891316	0.000228259
A05			h2b	12.3861		9.52347	-2.86265	0.137485	13.7485	14.3508	0.851715
A06				12.265		9.52347	-2.74149	0.14953	14.953
A07			beads	22.5212		9.52347	-12.9977	0.000122264	0.0122264	0.0114702	0.00106934
A08				22.7117		9.52347	-13.1882	0.000107141	0.0107141
A09		cp27 si	cenp a	21.6804		9.58561	-12.0947	0.000228622	0.0228622	0.0225979	0.000373753		0.00141211
A10				21.7141		9.58561	-12.1285	0.000223336	0.0223336
A11			h2az	16.0991		9.58561	-6.51347	0.0109459	1.09459	1.06744	0.0383969		0.0667023
A12				16.1725		9.58561	-6.58688	0.0104029	1.04029
B01			h2b	12.3612		9.58561	-2.77561	0.146036	14.6036	16.003	1.97909
B02				12.1082		9.58561	-2.52264	0.174024	17.4024
B03			beads	23.0657		9.58561	-13.4801	8.75175e-05	0.00875175	0.00891316	0.000228259
B04				23.0134		9.58561	-13.4278	9.07456e-05	0.00907456
B05		input	con si	9.55639	9.52347
B06				9.49055
B07			cp27 si	9.58514	9.58561
B08				9.58607
B09	maj sat I	con si	cenp a	14.081		2.42451	-11.6565	0.000309768	0.0309768	0.0301483	0.00117168		0.00302817
B10				14.1603		2.42451	-11.7358	0.000293198	0.0293198
B11			h2az	11.4334		2.42451	-9.00885	0.00194118	0.194118	0.192457	0.00234859		0.0193309
B12				11.4583		2.42451	-9.03375	0.00190796	0.190796
C01			h2b	5.94741		2.42451	-3.5229	0.0869962	8.69962	9.95593	1.77669
C02				5.58136		2.42451	-3.15685	0.112122	11.2122
C03			beads	16.5988		2.42451	-14.1743	5.40899e-05	0.00540899	0.00547916	9.92301e-05
C04				16.5618		2.42451	-14.1373	5.54932e-05	0.00554932
C05		cp27 si	cenp a	15.9297		1.67815	-14.2515	5.12709e-05	0.00512709	0.00494171	0.000262159		0.000666608
C06				16.0379		1.67815	-14.3598	4.75634e-05	0.00475634
C07			h2az	11.5693		1.67815	-9.8912	0.00105306	0.105306	0.10286	0.00345911		0.0138752
C08				11.638		1.67815	-9.95982	0.00100414	0.100414
C09			h2b	5.45396		1.67815	-3.77581	0.0730078	7.30078	7.41322	0.159022
C10				5.41019		1.67815	-3.73204	0.0752567	7.52567
C11			beads	17.1987		1.67815	-15.5205	2.1274e-05	0.0021274	0.00209635	4.39242e-05
C12				17.2414		1.67815	-15.5633	2.06529e-05	0.00206529
D01		input	con si	2.79792	2.42451
D02				2.0511
D03			cp27 si	1.79775	1.67815
D04				1.55855
D05	maj sat II	con si	cenp a	14.1131		1.29089	-12.8222	0.000138083	0.0138083	0.0146212	0.00114955		0.00353897
D06				13.9525		1.29089	-12.6616	0.00015434	0.015434
D07			h2az	11.3414		1.29089	-10.0505	0.000942979	0.0942979	0.0962146	0.00271067		0.0232882
D08				11.2839		1.29089	-9.993	0.000981314	0.0981314
D09			h2b	5.9817		1.29089	-4.6908	0.0387193	3.87193	4.13148	0.367057
D10				5.80019		1.29089	-4.5093	0.0439103	4.39103
D11			beads	16.6549		1.29089	-15.364	2.37116e-05	0.00237116	0.00226306	0.000152874
D12				16.7929		1.29089	-15.502	2.15497e-05	0.00215497
E01		cp27 si	cenp a	16.0879		1.74918	-14.3387	4.82625e-05	0.00482625	0.00509269	0.000376802		0.00067969
E02				15.9368		1.74918	-14.1876	5.35913e-05	0.00535913
E03			h2az	11.6476		1.74918	-9.89841	0.00104781	0.104781	0.103105	0.00236947		0.0137608
E04				11.6945		1.74918	-9.9453	0.0010143	0.10143
E05			h2b	5.42242		1.74918	-3.67324	0.0783871	7.83871	7.49266	0.48939
E06				5.55578		1.74918	-3.8066	0.0714661	7.14661
E07			beads	17.0144		1.74918	-15.2652	2.53923e-05	0.00253923	0.00238302	0.000220923
E08				17.2038		1.74918	-15.4547	2.2268e-05	0.0022268
E09		input	con si	NaN	1.29089
E10				1.29089
E11			cp27 si	1.39228	1.74918
E12				2.10608
