# Supplementary material for: CFDP1 regulates the stability of pericentric heterochromatin thereby affecting RAN GTPase activity and mitotic spindle formation
Source: PLoS Biol. 2024 Apr 17;22(4):e3002574. doi: 10.1371/journal.pbio.3002574 (PMC11023358; doi:10.1371/journal.pbio.3002574)
Supplement: S2 Table — (XLSX) [file pbio.3002574.s006.xlsx]

## Sheet: Sheet1
	S2 Table
	GENE ONTOLOGY ENRICHMENT FOR H2AZ BOUND PEAKS IN NIH3T3 CELLS
	P-value	Log P-value	Annotation	Ann Group	#features	Coverage(bp)	AvgFeatureSize[ref=1314]	Overlap(#peaks)	Overlap(bp)	Expected Overlap(bp, gsize=2.00e+09)	Log Ratio Enrichment	Log P-value(+ underrepresented)	P-value
	1e-8289	-19088.4	promoters	basic	43511	30225175	694	10882	11816415	763256	2.74	-19088.4	0
	1e-5988	-13790.3	cpgIsland	basic	16023	10495450	655	9351	6653787	265034	3.22	-13790.3	0
	1e-1781	-4099.81	utr5	basic	61055	5406150	88	10301	2438984	136517	2.88	-4099.81	0
	1e-653	-1503.03	exons	basic	490568	69980166	142	12339	4835174	1767162	1.01	-1503.03	0
	1e-573	-1318.61	protein-coding	basic	474538	64982913	136	11826	4403568	1640970	0.99	-1318.61	0
	1e-201	-462.6	coding	basic	391329	41605475	106	9410	2317759	1050635	0.79	-462.6	1.25e-201
	1e-156	-357.02	GC_rich|Low_complexity|Low_complexity	repeats	8072	286928	35	2845	178440	7245	3.2	-357.02	8.87e-156
	1e-98	-224.77	ncRNA	basic	11166	4308273	385	914	435605	108793	1.39	-224.77	2.42e-98
	1.16e-29	-66.62	CGGn|Simple_repeat|Simple_repeat	repeats	832	48899	58	485	31853	1234	3.25	-66.62	1.16e-29
	4.53e-27	-60.66	CCGn|Simple_repeat|Simple_repeat	repeats	889	51325	57	477	31346	1296	3.19	-60.66	4.53e-27
	2.78e-18	-40.42	CGGGGn|Simple_repeat|Simple_repeat	repeats	523	33228	63	283	20097	839	3.18	-40.42	2.78e-18
	6.61e-17	-37.26	CCCCGn|Simple_repeat|Simple_repeat	repeats	535	32806	61	266	18577	828	3.11	-37.26	6.61e-17
	2.79e-16	-35.81	tts	basic	43511	28430769	653	1496	975267	717943	0.31	-35.81	2.79e-16
	3.09e-13	-28.81	C-rich|Low_complexity|Low_complexity	repeats	17403	1573326	90	1180	102357	39730	0.95	-28.81	3.09e-13
	1.04e-12	-27.59	G-rich|Low_complexity|Low_complexity	repeats	17888	1613323	90	1128	101393	40740	0.91	-27.59	1.04e-12
	2.28e-10	-22.2	RLTR23|LTR|ERV1	repeats	1524	492057	322	134	45325	12425	1.29	-22.2	2.28e-10
	6.01e-10	-21.23	MMERGLN_LTR|LTR|ERV1	repeats	435	167021	383	94	25058	4217	1.78	-21.23	6.01e-10
	7.54e-10	-21.01	Low_complexity|Low_complexity	repeats	386539	20019739	51	8186	666221	505545	0.28	-21.01	7.54e-10
	7.54e-10	-21.01	Low_complexity	repeats	386539	20019739	51	8186	666221	505545	0.28	-21.01	7.54e-10
	8.17e-06	11.72	IAPLTR1a_Mm|LTR|ERVK	repeats	1786	602641	337	1	87	15218	-5.16	11.72	8.17e-06
	7.92e-06	11.75	L1MB7|LINE|L1	repeats	6956	1874929	269	83	17676	47346	-0.99	11.75	7.92e-06
	7.82e-06	11.76	L1MC3|LINE|L1	repeats	5288	1541248	291	53	12259	38920	-1.16	11.76	7.82e-06
	7.37e-06	11.82	MurERV4_19-int|LTR|ERVK	repeats	969	607220	626	0	0	15333	-9.64	11.82	7.37e-06
	7.16e-06	11.85	ERVB4_1B-I_MM-int|LTR|ERVK	repeats	1368	750648	548	6	1557	18955	-2.5	11.85	7.16e-06
	6.77e-06	11.9	L1MA5|LINE|L1	repeats	4952	1281194	258	40	8576	32353	-1.33	11.9	6.77e-06
	5.29e-06	12.15	IAPLTR2_Mm|LTR|ERVK	repeats	1388	625114	450	0	0	15785	-9.67	12.15	5.29e-06
	5.04e-06	12.2	MuRRS-int|LTR|ERV1	repeats	996	1301882	1307	13	8584	32875	-1.34	12.2	5.04e-06
	5.02e-06	12.2	IAPLTR2a2_Mm|LTR|ERVK	repeats	1541	627230	407	5	949	15839	-2.81	12.2	5.02e-06
	4.52e-06	12.31	RLTR22_Mur|LTR|ERVK	repeats	2503	1113484	444	19	6547	28118	-1.46	12.31	4.52e-06
	4.23e-06	12.37	ORR1A3-int|LTR|ERVL-MaLR	repeats	2435	779378	320	9	2010	19681	-2.28	12.37	4.23e-06
	3.57e-06	12.54	ORR1A1-int|LTR|ERVL-MaLR	repeats	859	789579	919	6	2035	19938	-2.28	12.54	3.57e-06
	2.8e-06	12.79	RMER12C|LTR|ERVK	repeats	4954	925464	186	31	3433	23370	-1.92	12.79	2.8e-06
	2.33e-06	12.97	ORR1A1|LTR|ERVL-MaLR	repeats	4414	1255491	284	31	6789	31704	-1.54	12.97	2.33e-06
	2.21e-06	13.02	MurSAT1|Satellite|Satellite	repeats	5741	669754	116	0	0	16912	-9.74	13.02	2.21e-06
	2.22e-06	13.02	ORR1D2|LTR|ERVL-MaLR	repeats	15061	3643191	241	215	46195	91999	-0.69	13.02	2.22e-06
	2.02e-06	13.11	MMERGLN-int|LTR|ERV1	repeats	856	1264267	1476	16	7698	31925	-1.42	13.11	2.02e-06
	1.79e-06	13.23	B2_Mm1t|SINE|B2	repeats	23218	3807525	163	355	48893	96148	-0.68	13.23	1.79e-06
	1.41e-06	13.47	URR1A|DNA|hAT-Charlie	repeats	17621	3251469	184	262	38862	82107	-0.75	13.47	1.41e-06
	1.37e-06	13.5	RMER19B2|LTR|ERVK	repeats	2296	1080241	470	19	3957	27278	-1.93	13.5	1.37e-06
	1.25e-06	13.59	L1MC1|LINE|L1	repeats	5571	1670209	299	55	12877	42176	-1.19	13.59	1.25e-06
	9.5e-07	13.87	RMER12|LTR|ERVK	repeats	3319	987310	297	24	3853	24931	-1.87	13.87	9.5e-07
	8.59e-07	13.97	RMER3D-int|LTR|ERVK	repeats	2711	1216356	448	13	5438	30715	-1.73	13.97	8.59e-07
	8.14e-07	14.02	L1MD|LINE|L1	repeats	6361	1420613	223	47	8431	35873	-1.45	14.02	8.14e-07
	8.02e-07	14.04	MurERV4-int|LTR|ERVK	repeats	1525	870949	571	5	2429	21993	-2.2	14.04	8.02e-07
	6.83e-07	14.2	RLTR17D_Mm|LTR|ERVK	repeats	1225	730458	596	3	529	18445	-3.55	14.2	6.83e-07
	6.78e-07	14.2	L1MA9|LINE|L1	repeats	4587	1229954	268	29	5995	31059	-1.64	14.2	6.78e-07
	6.72e-07	14.21	MER2|DNA|TcMar-Tigger	repeats	10246	1891378	184	104	15745	47761	-1.11	14.21	6.72e-07
	6.36e-07	14.27	ORR1F|LTR|ERVL-MaLR	repeats	23086	4826445	209	345	66773	121879	-0.6	14.27	6.36e-07
	6.04e-07	14.32	Satellite	repeats	36869	5040247	136	567	70411	127278	-0.59	14.32	6.04e-07
	6.04e-07	14.32	Satellite|Satellite	repeats	36865	5040231	136	567	70411	127277	-0.59	14.32	6.04e-07
	5.85e-07	14.35	RLTR10C|LTR|ERVK	repeats	1779	737626	414	6	1237	18626	-2.71	14.35	5.85e-07
	5.57e-07	14.4	MTE2b|LTR|ERVL-MaLR	repeats	14367	3337034	232	190	39382	84267	-0.76	14.4	5.57e-07
	5.15e-07	14.48	RLTR13B1|LTR|ERVK	repeats	1029	744337	723	5	785	18796	-3.18	14.48	5.15e-07
	4.7e-07	14.57	RLTR21|LTR|ERVK	repeats	3816	1357109	355	24	7497	34270	-1.52	14.57	4.7e-07
	3.7e-07	14.81	RLTR45-int|LTR|ERVK	repeats	1317	913072	693	5	2429	23057	-2.25	14.81	3.7e-07
	2.96e-07	15.03	ORR1B1-int|LTR|ERVL-MaLR	repeats	2965	1386109	467	37	7039	35002	-1.6	15.03	2.96e-07
	2.93e-07	15.04	ETnERV3-int|LTR|ERVK	repeats	560	773741	1381	1	234	19538	-4.42	15.04	2.93e-07
	2.84e-07	15.07	TAGAn|Simple_repeat|Simple_repeat	repeats	14415	1388344	96	100	7162	35058	-1.59	15.07	2.84e-07
	1.63e-07	15.63	MT2A|LTR|ERVL	repeats	10140	2586693	255	115	24244	65320	-0.99	15.63	1.63e-07
	1.22e-07	15.92	RCHARR1|DNA|hAT-Charlie	repeats	6811	2101859	308	84	16096	53076	-1.19	15.92	1.22e-07
	4.79e-08	16.85	L1M3|LINE|L1	repeats	7043	1701711	241	54	10163	42972	-1.44	16.85	4.79e-08
	4.73e-08	16.87	YREP_Mm|Unknown|Unknown	repeats	2800	1156560	413	37	3249	29205	-2.2	16.87	4.73e-08
	4.69e-08	16.88	ORR1A4-int|LTR|ERVL-MaLR	repeats	1326	1024854	772	7	2075	25879	-2.52	16.88	4.69e-08
	4.29e-08	16.97	TCTAn|Simple_repeat|Simple_repeat	repeats	14364	1397216	97	94	5802	35282	-1.81	16.97	4.29e-08
	3.9e-08	17.06	L1MA4|LINE|L1	repeats	7467	2183090	292	65	16955	55128	-1.18	17.06	3.9e-08
	2.62e-08	17.46	ORR1C2|LTR|ERVL-MaLR	repeats	12473	2976165	238	127	28050	75155	-0.99	17.46	2.62e-08
	2.46e-08	17.52	Lx2A1|LINE|L1	repeats	2739	1316599	480	15	5096	33247	-1.88	17.52	2.46e-08
	2.08e-08	17.69	MT2_Mm|LTR|ERVL	repeats	2667	1202547	450	14	2632	30367	-2.45	17.69	2.08e-08
	1.76e-08	17.86	MurSatRep1|Unknown|Unknown	repeats	2600	917535	352	17	1132	23169	-3.02	17.86	1.76e-08
	1.32e-08	18.14	RMER1C|Other|Other	repeats	6347	1981244	312	47	12510	50031	-1.39	18.14	1.32e-08
	1.2e-08	18.24	MTEa|LTR|ERVL-MaLR	repeats	20061	4434199	221	267	51861	111973	-0.77	18.24	1.2e-08
	7.66e-09	18.69	CAn|Simple_repeat|Simple_repeat	repeats	153331	8651404	56	2459	131373	218468	-0.51	18.69	7.66e-09
	7.1e-09	18.76	L1MA6|LINE|L1	repeats	6985	1923791	275	49	10744	48580	-1.51	18.76	7.1e-09
	5.79e-09	18.97	RMER6C|LTR|ERVK	repeats	4887	1937071	396	35	11194	48915	-1.47	18.97	5.79e-09
	8.99e-10	20.83	MERVL_2A-int|LTR|ERVL	repeats	3899	2056976	527	31	11001	51943	-1.55	20.83	8.99e-10
	6.45e-10	21.16	MTE2a|LTR|ERVL-MaLR	repeats	15148	3919074	258	180	38648	98965	-0.94	21.16	6.45e-10
	4.41e-10	21.54	RLTR10|LTR|ERVK	repeats	2930	1107075	377	3	271	27956	-4.64	21.54	4.41e-10
	3.48e-10	21.78	TGn|Simple_repeat|Simple_repeat	repeats	153596	8750701	56	2474	125987	220975	-0.56	21.78	3.48e-10
	2.94e-10	21.95	MMERVK9E_I-int|LTR|ERVK	repeats	1568	1439951	918	8	2982	36362	-2.5	21.95	2.94e-10
	1.59e-10	22.56	ETnERV-int|LTR|ERVK	repeats	906	1159668	1279	2	1117	29284	-3.27	22.56	1.59e-10
	1.55e-10	22.59	RSINE1|SINE|B4	repeats	115806	14367601	124	2088	235575	362815	-0.43	22.59	1.55e-10
	1.15e-10	22.89	MYSERV6-int|LTR|ERVK	repeats	3183	1746159	548	23	6418	44094	-1.93	22.89	1.15e-10
	7.99e-11	23.25	ORR1A2-int|LTR|ERVL-MaLR	repeats	2132	1766780	828	19	6192	44615	-1.97	23.25	7.99e-11
	2.55e-11	24.39	IAPLTR3-int|LTR|ERVK	repeats	1773	1706904	962	8	5224	43103	-2.11	24.39	2.55e-11
	2.44e-11	24.44	MYSERV16_I-int|LTR|ERVK	repeats	2516	1429237	568	9	1807	36091	-2.99	24.44	2.44e-11
	1.43e-11	24.97	L1M5|LINE|L1	repeats	16596	3546652	213	192	28535	89561	-1.14	24.97	1.43e-11
	3.92e-12	26.26	MMERVK9C_I-int|LTR|ERVK	repeats	1807	1940449	1073	18	6023	49000	-2.1	26.26	3.92e-12
	2.68e-12	26.65	RMER16-int|LTR|ERVK	repeats	2599	1696712	652	11	2785	42845	-2.73	26.65	2.68e-12
	4.8e-13	28.36	Unknown|Unknown	repeats	6791	2302100	338	90	8899	58133	-1.88	28.36	4.8e-13
	2.78e-13	28.91	MMETn-int|LTR|ERVK	repeats	980	1484863	1515	4	754	37496	-3.91	28.91	2.78e-13
	1.5e-13	29.53	ETnERV2-int|LTR|ERVK	repeats	1805	1516859	840	4	823	38304	-3.84	29.53	1.5e-13
	1.31e-13	29.66	Lx4B|LINE|L1	repeats	5680	3026642	532	60	17000	76429	-1.5	29.66	1.31e-13
	9.91e-14	29.94	MTC|LTR|ERVL-MaLR	repeats	27489	7529698	273	370	86898	190142	-0.78	29.94	9.91e-14
	7.7e-14	30.2	MuRRS4-int|LTR|ERV1	repeats	2735	2409366	880	15	8121	60842	-2.01	30.2	7.7e-14
	4.21e-14	30.8	ORR1A2|LTR|ERVL-MaLR	repeats	14843	4145627	279	153	31023	104686	-1.22	30.8	4.21e-14
	3.53e-14	30.98	RLTR10-int|LTR|ERVK	repeats	2617	1932821	738	10	2871	48808	-2.83	30.98	3.53e-14
	3.06e-14	31.12	Lx10|LINE|L1	repeats	10010	2910742	290	56	13692	73503	-1.68	31.12	3.06e-14
	2.69e-14	31.25	ORR1B1|LTR|ERVL-MaLR	repeats	17313	5129365	296	197	45917	129528	-1.04	31.25	2.69e-14
	2.52e-14	31.31	Unknown	repeats	9660	2704631	279	122	11282	68298	-1.8	31.31	2.52e-14
	1.84e-14	31.63	DNA|TcMar-Tigger	repeats	35118	6845319	194	415	73215	172860	-0.86	31.63	1.84e-14
	8.93e-15	32.35	B4|SINE|B4	repeats	64020	10735987	167	977	140953	271108	-0.65	32.35	8.93e-15
	6.3e-15	32.7	B3A|SINE|B2	repeats	92925	13883243	149	1502	200181	350584	-0.56	32.7	6.3e-15
	1.3e-15	34.27	MURVY-int|LTR|ERV1	repeats	544	1949857	3584	5	1514	49238	-3.48	34.27	1.3e-15
	9.07e-16	34.64	B2_Mm2|SINE|B2	repeats	90007	13833615	153	1402	194477	349331	-0.59	34.64	9.07e-16
	8.06e-16	34.75	RLTR6-int|LTR|ERV1	repeats	1220	2282700	1871	11	4653	57643	-2.52	34.75	8.06e-16
	6.33e-16	35	L1VL1|LINE|L1	repeats	1797	1987488	1106	9	2155	50188	-3.15	35	6.33e-16
	6.12e-16	35.03	ORR1D1|LTR|ERVL-MaLR	repeats	21507	5070778	235	196	40150	128048	-1.16	35.03	6.12e-16
	4.93e-16	35.25	L1M4|LINE|L1	repeats	13935	3380006	242	104	16835	85353	-1.62	35.25	4.93e-16
	4.26e-16	35.39	RLTR17B_Mm|LTR|ERVK	repeats	27369	3597379	131	171	18634	90842	-1.58	35.39	4.26e-16
	1.31e-16	36.57	Other|Other	repeats	19450	8049308	413	212	86270	203263	-0.86	36.57	1.31e-16
	1.31e-16	36.57	Other	repeats	19450	8049308	413	212	86270	203263	-0.86	36.57	1.31e-16
	1.25e-16	36.62	TAn|Simple_repeat|Simple_repeat	repeats	55708	3466323	62	302	16920	87532	-1.64	36.62	1.25e-16
	5e-17	37.53	MusHAL1|LINE|L1	repeats	3890	2286222	587	14	3182	57732	-2.9	37.53	5e-17
	7.55e-18	39.42	Lx3B|LINE|L1	repeats	5993	3418364	570	37	13653	86321	-1.84	39.42	7.55e-18
	3.82e-18	40.11	Lx3C|LINE|L1	repeats	6475	3895528	601	43	18796	98371	-1.66	40.11	3.82e-18
	2.43e-18	40.56	IAPEY3-int|LTR|ERVK	repeats	2345	2082980	888	1	425	52600	-4.82	40.56	2.43e-18
	7.16e-19	41.78	Lx4A|LINE|L1	repeats	10564	6004928	568	119	47048	151638	-1.17	41.78	7.16e-19
	4.74e-19	42.19	MMERVK10C-int|LTR|ERVK	repeats	3230	2833287	877	13	6030	71547	-2.47	42.19	4.74e-19
	4.62e-20	44.52	AT_rich|Low_complexity|Low_complexity	repeats	228756	7245233	31	2035	62365	182959	-1.08	44.52	4.62e-20
	1.65e-20	45.55	IAPEy-int|LTR|ERVK	repeats	755	2339427	3098	0	0	59075	-10.99	45.55	1.65e-20
	7.92e-21	46.29	MTA_Mm-int|LTR|ERVL-MaLR	repeats	3027	2753938	909	11	2929	69543	-3.17	46.29	7.92e-21
	6.72e-21	46.45	L1Md_Gf|LINE|L1	repeats	1080	2385574	2208	2	252	60241	-5.48	46.45	6.72e-21
	5.79e-22	48.9	DNA|hAT-Charlie	repeats	105698	18382749	173	1774	251682	464207	-0.61	48.9	5.79e-22
	1.27e-22	50.42	MTD|LTR|ERVL-MaLR	repeats	51544	13386607	259	688	156548	338043	-0.77	50.42	1.27e-22
	1.05e-22	50.61	MTA_Mm|LTR|ERVL-MaLR	repeats	15623	5784262	370	148	35400	146066	-1.42	50.61	1.05e-22
	3.33e-23	51.76	LTR|ERV1	repeats	71980	31319358	435	1698	499672	790886	-0.46	51.76	3.33e-23
	1.05e-23	52.91	L1_Rod|LINE|L1	repeats	11315	4215944	372	62	13334	106462	-2.08	52.91	1.05e-23
	1.04e-23	52.92	Lx2B|LINE|L1	repeats	6191	3838563	620	28	10003	96932	-2.27	52.92	1.04e-23
	4.76e-25	56.01	L1M2|LINE|L1	repeats	18488	5419521	293	112	25573	136855	-1.68	56.01	4.76e-25
	2.53e-25	56.63	B3|SINE|B2	repeats	148427	24801596	167	2380	358586	626298	-0.56	56.63	2.53e-25
	1.91e-26	59.22	Simple_repeat	repeats	1015643	58263628	57	14003	1041763	1471292	-0.35	59.22	1.91e-26
	1.91e-26	59.22	Simple_repeat|Simple_repeat	repeats	1015643	58263628	57	14003	1041763	1471292	-0.35	59.22	1.91e-26
	8e-27	60.09	utr3	basic	38184	25404201	665	880	361882	641515	-0.57	60.09	8e-27
	2.77e-27	61.15	Lx5c|LINE|L1	repeats	16422	7550102	459	140	48851	190657	-1.36	61.15	2.77e-27
	1.04e-29	66.73	Lx5b|LINE|L1	repeats	7975	5139510	644	57	15729	129784	-2.11	66.73	1.04e-29
	2.89e-30	68.02	L1_Mm|LINE|L1	repeats	5429	3491356	643	9	1182	88164	-4.31	68.02	2.89e-30
	1.82e-30	68.48	B4A|SINE|B4	repeats	107073	19454907	181	1503	233958	491281	-0.74	68.48	1.82e-30
	3.17e-32	72.53	MERVL-int|LTR|ERVL	repeats	2600	4317333	1660	15	4255	109022	-3.24	72.53	3.17e-32
	1.27e-32	73.44	L1_Mur1|LINE|L1	repeats	7793	4531827	581	21	6362	114439	-2.89	73.44	1.27e-32
	5.9e-34	76.51	L1VL2|LINE|L1	repeats	4697	5294984	1127	26	11700	133710	-2.44	76.51	5.9e-34
	8.06e-35	78.5	DNA	repeats	163077	29238392	179	2630	396538	738337	-0.62	78.5	8.06e-35
	1.11e-35	80.49	LTR|ERVL	repeats	118061	32564520	275	2059	455037	822330	-0.59	80.49	1.11e-35
	9.05e-38	85.3	SINE|B4	repeats	397726	59021890	148	6553	973435	1490440	-0.43	85.3	9.05e-38
	7.52e-38	85.48	Lx2B2|LINE|L1	repeats	11012	6338293	575	59	16053	160056	-2.3	85.48	7.52e-38
	2.34e-38	86.65	Lx8b|LINE|L1	repeats	24166	8398265	347	147	38237	212075	-1.71	86.65	2.34e-38
	3.12e-40	90.97	Lx3A|LINE|L1	repeats	9223	6092984	660	30	11813	153862	-2.57	90.97	3.12e-40
	5.74e-43	97.26	L1VL4|LINE|L1	repeats	6091	6286263	1032	26	10264	158742	-2.74	97.26	5.74e-43
	4.76e-45	102.06	Lx5|LINE|L1	repeats	16339	9566907	585	144	41322	241586	-1.77	102.06	4.76e-45
	6.07e-47	106.42	L1Md_F|LINE|L1	repeats	4016	5914014	1472	13	3741	149342	-3.69	106.42	6.07e-47
	3.05e-47	107.11	Lx8|LINE|L1	repeats	49141	16415518	334	520	130249	414530	-1.16	107.11	3.05e-47
	1.47e-50	114.74	Lx3_Mus|LINE|L1	repeats	12651	8781443	694	62	24572	221751	-2.2	114.74	1.47e-50
	1e-51	116.69	Lx6|LINE|L1	repeats	18164	9145804	503	99	27144	230952	-2.14	116.69	2.11e-51
	1e-55	126.5	L1_Mus4|LINE|L1	repeats	11880	8768629	738	64	18362	221428	-2.49	126.5	1.16e-55
	1e-57	129.95	Lx2|LINE|L1	repeats	18521	10409643	562	103	32179	262867	-2.1	129.95	3.67e-57
	1e-61	139.1	SINE|B2	repeats	372923	59411092	159	5162	845775	1500268	-0.57	139.1	3.89e-61
	1e-69	156.95	L1_Mur2|LINE|L1	repeats	20769	11159008	537	84	23825	281791	-2.47	156.95	6.86e-69
	1e-69	158.51	Lx9|LINE|L1	repeats	49160	15868955	322	282	75411	400728	-1.67	158.51	1.45e-69
	1e-72	163.76	L1_Mur3|LINE|L1	repeats	27399	12733383	464	125	36289	321547	-2.18	163.76	7.6e-72
	1e-75	171.36	Lx7|LINE|L1	repeats	40190	16231071	403	231	70913	409872	-1.75	171.36	3.8e-75
	1e-77	177.17	SINE	repeats	1533009	202829822	132	17349	3752782	5121926	-0.31	177.17	1.14e-77
	1e-90	207.01	Lx|LINE|L1	repeats	24834	16350444	658	161	47854	412886	-2.16	207.01	1.25e-90
	1e-101	231.62	IAPEz-int|LTR|ERVK	repeats	7319	11864165	1621	0	0	299597	-12.61	231.62	2.56e-101
	1e-103	235.88	L1_Mus2|LINE|L1	repeats	21079	15938537	756	105	27715	402485	-2.68	235.88	3.61e-103
	1e-113	259.02	L1Md_F3|LINE|L1	repeats	16146	14860651	920	50	9968	375266	-3.63	259.02	3.22e-113
	1e-148	339.29	L1_Mus1|LINE|L1	repeats	27252	21996669	807	120	31544	555467	-2.87	339.29	4.44e-148
	1e-235	540.68	LTR|ERVL-MaLR	repeats	454918	122681218	269	5323	1313754	3097987	-0.86	540.68	1.54e-235
	1e-244	561.35	L1_Mus3|LINE|L1	repeats	48489	36693321	756	202	56466	926592	-2.8	561.35	1.62e-244
	1e-274	628.96	L1Md_A|LINE|L1	repeats	16844	32671406	1939	31	3590	825029	-5.44	628.96	6.99e-274
	1e-391	900.33	LTR|ERVK	repeats	319317	130486742	408	3253	1001685	3295095	-1.19	900.33	0
	1e-409	940.27	L1Md_T|LINE|L1	repeats	23688	48668239	2054	45	5173	1228986	-5.47	940.27	0
	1e-496	1141.81	centromeres	basic	20	57800000	2890000	0	0	1459585	-14.19	1141.81	0
	1e-551	1267.91	L1Md_F2|LINE|L1	repeats	64898	74017535	1140	270	59823	1869115	-3.44	1267.91	0
	1e-639	1469.98	introns	basic	375078	968114867	2581	18337	17627428	24447162	-0.33	1469.98	0
	1e-674	1550.78	gaps	basic	686	78088274	113831	15	1118	1971911	-7.48	1550.78	0
	1e-695	1599.94	LTR	repeats	972593	318060098	327	10791	3297158	8031760	-0.89	1599.94	0
	1e-3434	7906.51	LINE	repeats	989393	547436765	553	7146	1775565	13824057	-2.05	7906.51	0
	1e-3521	8108.46	LINE|L1	repeats	905176	534542681	590	5333	1502779	13498451	-2.2	8108.46	0
	1e-7476	17215.1	intergenic	basic	18319	1659160091	90570	23651	21018372	41897668	-0.69	17215.1	0
