# Supplementary material for: CFDP1 regulates the stability of pericentric heterochromatin thereby affecting RAN GTPase activity and mitotic spindle formation
Source: PLoS Biol. 2024 Apr 17;22(4):e3002574. doi: 10.1371/journal.pbio.3002574 (PMC11023358; doi:10.1371/journal.pbio.3002574)
Supplement: S3 Data — (XLSX) [file pbio.3002574.s014.xlsx]

## Sheet: Figure 5 G H I
		Figure 5 EdU and S phase assay
		Stage		Cells		P
		early	con si	33	4	0.0021
			CFDP1 si	31	2
		mid late	con si	37	3
			CFDP1 si	46	4	0.0001
		very late	con si	24	5	0.267
			CFDP1 si	23	4
		mid-late	con si	14	6	0.0001
			CFDP1 si	35	5
		early+verylate	con si	86	12	0.0001
			CFDP1 si	65	12
		mid-late	con si	20	5	0.0001
			CFDP1 si	33	4
		early+verylate	con si	80	8	0.0001
			CFDP1 si	67	9
