# Supplementary material for: CFDP1 regulates the stability of pericentric heterochromatin thereby affecting RAN GTPase activity and mitotic spindle formation
Source: PLoS Biol. 2024 Apr 17;22(4):e3002574. doi: 10.1371/journal.pbio.3002574 (PMC11023358; doi:10.1371/journal.pbio.3002574)
Supplement: S3 Table — (XLSX) [file pbio.3002574.s007.xlsx]

## Sheet: Sheet 1
PeakID	Chr	Start	End	Strand	Peak.Score	Focus.Ratio.Region.Size	Annotation	Detailed.Annotation	Distance.to.TSS	Nearest.PromoterID	Entrez.ID	Nearest.Unigene	Nearest.Refseq	Nearest.Ensembl	Gene.Name	Gene.Alias	Gene.Description	Gene.Type	Region	Control/CP27	P-value	CONTROL.1	CONTROL.2	CP27.1	CP27.2	Flag.3	H2A2.3	CONTROL.1_Peaks	CONTROL.2_Peaks	CONTROL_vs_CP27_Peaks	CP27.1_Peaks	CP27.2_Peaks	CP27_vs_CONTROL_Peaks	Flag.3_Peaks	H2A2_Peaks
Merged-chr4-74784001-2	chr4	74783573	74784430	+	7.795	CONTROL-2_Peaks|Flag-3_Peaks	Intergenic	L1_Mus3|LINE|L1	494291	NM_025849	66928	Mm.24332	NM_025849	ENSMUSG00000028398	Dmac1	1700027K24Rik|3110001D03Rik|Tmem261	distal membrane arm assembly complex 1	protein-coding	chr4:74783573-74784430	3.85	0.217539	5.79	11.15	1.75	2.65	10.47	4.29		chr4-18052					chr4-1905
Merged-chr4-91090514-3	chr4	91090189	91090889	+	6.22333	CONTROL-2_Peaks|CONTROL_vs_CP27_Peaks|Flag-3_Peaks	Intergenic	Intergenic	281516	NM_010486	15569	Mm.318042	NM_010486	ENSMUSG00000008489	Elavl2	Hub|mel-N1	ELAV like RNA binding protein 1	protein-coding	chr4:91090189-91090889	3.4875	0.118267	6.15	7.8	2.11	1.89	6.54	3.43		chr4-24455	chr4-33679				chr4-6500
Merged-chr6-35712503-2	chr6	35712237	35712770	+	6.385	CONTROL-1_Peaks|Flag-3_Peaks	Intergenic	Intergenic	-172615	NM_008098	14489	Mm.182746	NM_008098	ENSMUSG00000029840	Mtpn	5033418D15Rik|Gcdp|V1	myotrophin	protein-coding	chr6:35712237-35712770	3.03819	0.294733	6.15	2.6	1.75	1.13	6.98	4.29	chr6-25996						chr6-995
Merged-chr11-92366970-2	chr11	92366589	92367347	+	8.63	CONTROL-1_Peaks|Flag-3_Peaks	Intergenic	Intergenic	-731398	NM_001361707	72605	Mm.342160	NM_028296	ENSMUSG00000056158	Car10	2700029L05Rik|BB085816|Ca10	carbonic anhydrase 10	protein-coding	chr11:92366589-92367347	2.96634	0.161227	9.41	5.57	3.16	1.89	8.72	6	chr11-23608						chr11-818
Merged-chr7-43690474-2	chr7	43690223	43690726	+	6.4	CONTROL-2_Peaks|Flag-3_Peaks	promoter-TSS (NM_174866)	promoter-TSS (NM_174866)	56	NM_174866	317653	Mm.247377	NM_174866	ENSMUSG00000044737	Klk14	GK14	kallikrein related-peptidase 14	protein-coding	chr7:43690223-43690726	2.84932	0.0579993	5.79	6.69	2.11	2.27	6.11	5.14		chr7-20802					chr7-1189
Merged-chr11-104025304-3	chr11	104024861	104025655	+	9.61333	CONTROL-1_Peaks|CONTROL-2_Peaks|Flag-3_Peaks	Intergenic	Intergenic	58387	NM_007477	11841	Mm.5061	NM_007477	ENSMUSG00000062421	Arf2	-	ADP-ribosylation factor 2	protein-coding	chr11:104024861-104025655	2.34292	0.0698924	11.22	10.78	5.61	3.78	10.03	8.14	chr11-17519	chr11-17693					chr11-557
Merged-chr6-9479321-2	chr6	9478987	9479655	+	5.875	CONTROL_vs_CP27_Peaks|Flag-3_Peaks	Intergenic	Lx5|LINE|L1	529302	NM_008751	18231	Mm.46954	NM_008751	ENSMUSG00000046178	Nxph1	C130005L03Rik	neurexophilin 1	protein-coding	chr6:9478987-9479655	2.33032	0.0775673	3.98	6.32	1.4	3.02	7.85	0.86			chr6-37717				chr6-1468
Merged-chr11-56717051-2	chr11	56716675	56717428	+	7.885	CONTROL-2_Peaks|Flag-3_Peaks	Intergenic	Intergenic	-294567	NM_001113325	14799	Mm.4920	NM_008165	ENSMUSG00000020524	Gria1	2900051M01Rik|Glr-1|Glr1|GluA1|GluR-A|GluRA|Glur-1|Glur1|HIPA1|gluR-K1	glutamate receptor, ionotropic, AMPA1 (alpha 1)	protein-coding	chr11:56716675-56717428	2.2983	0.0236708	6.15	10.03	1.75	5.29	7.41	3		chr11-17221					chr11-1366
Merged-chr1-176330701-3	chr1	176330369	176331021	+	6.71	CONTROL-1_Peaks|CONTROL-2_Peaks|Flag-3_Peaks	Intergenic	Intergenic	-55383	NM_001357844	319455	Mm.338001	NM_176916	ENSMUSG00000055214	Pld5	B230365F16Rik	phospholipase D family, member 5	protein-coding	chr1:176330369-176331021	2.23558	0.0272317	6.15	7.8	2.46	3.78	6.98	5.14	chr1-36532	chr1-30902					chr1-7516
Merged-chr5-7344631-2	chr5	7344358	7344905	+	6.75	CONTROL-1_Peaks|Flag-3_Peaks	promoter-TSS (NM_001163223)	promoter-TSS (NM_001163223)	-253	NM_001163223	207618	Mm.478808	NM_001163223	ENSMUSG00000092094	Zfp804b	Gm441	zinc finger protein 804B	protein-coding	chr5:7344358-7344905	2.18942	0.166871	6.88	5.95	2.46	3.4	6.98	3.86	chr5-20457						chr5-1490
Merged-chr19-6652946-2	chr19	6652413	6653552	+	6.585	CONTROL_vs_CP27_Peaks|Flag-3_Peaks	Intergenic	B3|SINE|B2	-109912	NM_009203	20521	Mm.391146	NM_009203	ENSMUSG00000061742	Slc22a12	AI987855|OAT4L|Rst|Slc22al2|URAT1	solute carrier family 22 (organic anion/cation transporter), member 12	protein-coding	chr19:6652413-6653552	2.18349	0.138425	10.86	8.18	4.56	4.16	11.34	6			chr19-17102				chr19-269
Merged-chr5-38301901-2	chr5	38301449	38302354	+	7.58	CONTROL-1_Peaks|Flag-3_Peaks	intron (NM_172709, intron 6 of 6)	intron (NM_172709, intron 6 of 6)	-17608	NM_013503	13492	Mm.167154	NM_013503	ENSMUSG00000039358	Drd5	D5R|Drd-5|Drd1b|Gpcr1	dopamine receptor D5	protein-coding	chr5:38301449-38302354	2.15686	0.083678	11.59	10.41	4.91	5.29	10.03	3.86	chr5-12869						chr5-1730
Merged-chr4-86559610-2	chr4	86559116	86560242	+	10.085	CONTROL-1_Peaks|Flag-3_Peaks	non-coding (NR_131920, exon 2 of 2)	non-coding (NR_131920, exon 2 of 2)	1235	NR_131920	74888		NR_131920	ENSMUSG00000085108	Saxo1os	4930457A20Rik|Fam154aos	stabilizer of axonemal microtubules 1, opposite strand	ncRNA	chr4:86559116-86560242	2.13931	0.0826757	15.21	14.12	8.42	5.29	15.7	11.57	chr4-19172						chr4-282
Merged-chr1-135869140-2	chr1	135868727	135869554	+	6.71	CONTROL-1_Peaks|Flag-3_Peaks	Intergenic	Intergenic	28279	NM_001130176	21956	Mm.247470	NM_011619	ENSMUSG00000026414	Tnnt2	Tnt|cTnT	troponin T2, cardiac	protein-coding	chr1:135868727-135869554	2.10839	0.122957	11.59	10.78	4.56	6.05	9.59	6.86	chr1-31636						chr1-8702
Merged-chr6-66706392-2	chr6	66706116	66706669	+	6.4	CONTROL-2_Peaks|Flag-3_Peaks	Intergenic	RLTR34B_MM|LTR|ERVK	10497	NM_134166	171184	Mm.377165	NM_134166	ENSMUSG00000115482	Vmn1r36	V1rc11	vomeronasal 1 receptor 36	protein-coding	chr6:66706116-66706669	2.08778	0.239803	5.07	7.06	3.16	2.65	6.54	2.14		chr6-25071					chr6-2210
Merged-chr17-32649651-2	chr17	32649354	32649949	+	7.29	CONTROL-1_Peaks|Flag-3_Peaks	Intergenic	Intergenic	-9235	NM_001368735	631304	Mm.328950	NM_001101588	ENSMUSG00000090700	Cyp4f40	EG631304	cytochrome P450, family 4, subfamily f, polypeptide 40	protein-coding	chr17:32649354-32649949	2.01786	0.254569	7.97	4.46	3.51	2.65	7.41	8.14	chr17-18588						chr17-2299
Merged-chr17-17867641-2	chr17	17867345	17867972	+	7.115	Flag-3_Peaks|H2A2_Peaks	Intergenic	MLT1C|LTR|ERVL-MaLR	-12470	NM_008215	15116	Mm.255701	NM_008215	ENSMUSG00000003665	Has1	HAS	hyaluronan synthase 1	protein-coding	chr17:17867345-17867972	1.99012	0.277792	4.34	3.72	1.4	2.65	9.16	4.72							chr17-1118	chr17-29051
Merged-chr5-31298511-2	chr5	31298238	31298785	+	7.255	Flag-3_Peaks|H2A2_Peaks	intron (NM_144909, intron 2 of 18)	intron (NM_144909, intron 2 of 18)	948	NM_144909	231103	Mm.100043	NM_144909	ENSMUSG00000059434	Gckr	GKRP	glucokinase regulatory protein	protein-coding	chr5:31298238-31298785	1.98797	0.211324	7.6	8.92	4.91	3.4	7.41	8.14							chr5-992	chr5-16147
Merged-chr4-55412124-2	chr4	55411699	55412549	+	6.6	CONTROL-1_Peaks|Flag-3_Peaks	intron (NR_040674, intron 2 of 3)	ID_B1|SINE|B4	6718	NR_040674	100415914	Mm.261765	NR_040674	ENSMUSG00000087070	Gm12505	-	predicted gene 12505	ncRNA	chr4:55411699-55412549	1.95306	0.35066	9.41	5.57	3.51	4.16	9.59	8.57	chr4-27515						chr4-1627
Merged-chr1-179866637-3	chr1	179866337	179866972	+	7.48667	CONTROL-2_Peaks|Flag-3_Peaks|H2A2_Peaks	Intergenic	Intergenic	-62639	NM_026375	226747	Mm.128165	NM_026375	ENSMUSG00000026491	Ahctf1	6230412P20Rik|AV011447|Elys	AT hook containing transcription factor 1	protein-coding	chr1:179866337-179866972	1.91677	0.0550704	6.88	8.55	3.51	4.54	8.29	9		chr1-23337					chr1-7544	chr1-28493
Merged-chr11-91360018-3	chr11	91359208	91360587	+	11.9367	CONTROL-1_Peaks|Flag-3_Peaks|H2A2_Peaks	Intergenic	Intergenic	217658	NM_028547	73470	Mm.67677	NM_028547	ENSMUSG00000046755	Kif2b	1700063D03Rik	kinesin family member 2B	protein-coding	chr11:91359208-91360587	1.91326	0.446525	22.81	12.26	7.37	10.96	10.47	20.15	chr11-10172						chr11-1686	chr11-33586
Merged-chr1-143564816-2	chr1	143564507	143565142	+	7.255	CONTROL-1_Peaks|Flag-3_Peaks	Intergenic	Intergenic	-75873	NM_020025	26878	Mm.285580	NM_020025	ENSMUSG00000033849	B3galt2	-	UDP-Gal:betaGlcNAc beta 1,3-galactosyltransferase, polypeptide 2	protein-coding	chr1:143564507-143565142	1.90593	0.255796	7.97	5.2	3.51	3.4	6.98	3.43	chr1-23997						chr1-8769
Merged-chr15-8538863-2	chr15	8538594	8539133	+	6.94	Flag-3_Peaks|H2A2_Peaks	Intergenic	Charlie10b|DNA|hAT-Charlie	-94400	NM_201232	71175	Mm.240329	NM_027707	ENSMUSG00000022141	Nipbl	Idn3	NIPBL cohesin loading factor	protein-coding	chr15:8538594-8539133	1.8945	0.138172	7.6	8.92	4.56	4.16	8.29	7.29							chr15-334	chr15-20385
Merged-chr4-108962181-2	chr4	108961800	108962494	+	7.635	Flag-3_Peaks|H2A2_Peaks	intron (NR_040664, intron 1 of 5)	IMPB_01|Satellite|Satellite	9930	NR_040664	77173	Mm.402545	NR_040664	ENSMUSG00000086483	8030443G20Rik	-	RIKEN cDNA 8030443G20 gene	ncRNA	chr4:108961800-108962494	1.89218	0.250993	9.05	10.78	6.32	4.16	10.47	7.29							chr4-228	chr4-32787
Merged-chr4-125716989-2	chr4	125716572	125717407	+	7.42	CONTROL-2_Peaks|Flag-3_Peaks	Intergenic	Intergenic	205414	NR_015560	72395	Mm.112888	NR_015560	ENSMUSG00000085562	2610028E06Rik	BB043107	RIKEN cDNA 2610028E06 gene	ncRNA	chr4:125716572-125717407	1.87767	0.177057	6.15	9.66	3.51	4.91	10.9	3		chr4-25279					chr4-1487
Merged-chr5-51277560-3	chr5	51277025	51277907	+	8.91333	CONTROL-1_Peaks|CONTROL-2_Peaks|Flag-3_Peaks	Intergenic	Intergenic	276455	NR_027710	19017	Mm.259072	NM_008904	ENSMUSG00000029167	Ppargc1a	A830037N07Rik|Gm11133|PGC-1|PPARGC-1-alpha|Pgc-1alpha|Pgc1|Pgco1|Ppargc1	peroxisome proliferative activated receptor, gamma, coactivator 1 alpha	protein-coding	chr5:51277025-51277907	1.86824	0.0930702	12.67	11.15	6.32	6.43	6.98	8.57	chr5-25848	chr5-19911					chr5-1064
Merged-chr15-81507145-3	chr15	81506600	81507482	+	9.45333	CONTROL-1_Peaks|Flag-3_Peaks|H2A2_Peaks	Intergenic	Lx2A1|LINE|L1	40725	NM_019712	56438	Mm.29405	NM_019712	ENSMUSG00000022400	Rbx1	1500002P15Rik|AA517855|ROC1	ring-box 1	protein-coding	chr15:81506600-81507482	1.86084	0.106527	12.31	8.55	6.67	4.54	10.9	10.29	chr15-22361						chr15-186	chr15-18904
Merged-chr10-126767111-3	chr10	126766770	126767411	+	7.68333	CONTROL-1_Peaks|CONTROL-2_Peaks|Flag-3_Peaks	Intergenic	Intergenic	26620	NR_131015	75813	Mm.159583	NR_131015	ENSMUSG00000112832	4930484H19Rik	-	RIKEN cDNA 4930484H19 gene	ncRNA	chr10:126766770-126767411	1.84835	0.31465	10.5	6.32	4.56	4.54	7.41	6.43	chr10-16895	chr10-27699					chr10-884
Merged-chr4-72571344-2	chr4	72570913	72571775	+	6.095	CONTROL-1_Peaks|Flag-3_Peaks	Intergenic	RMER13B|LTR|ERVK	281290	NM_001199270	353204	Mm.317892	NM_001199270	ENSMUSG00000059343	Aldoart1	4921524E03Rik|Aldo1-ps|Aldo1-ps2|Aldoa-ps2	aldolase 1 A, retrogene 1	protein-coding	chr4:72570913-72571775	1.82504	0.0795606	10.86	11.15	5.26	6.8	8.72	6	chr4-22700						chr4-5478
Merged-chr11-9818112-5	chr11	9817208	9818923	+	11.292	CONTROL-1_Peaks|CONTROL-2_Peaks|CP27-1_Peaks|Flag-3_Peaks|H2A2_Peaks	Intergenic	(GA)n|Simple_repeat|Simple_repeat	626123	NM_178259	268379	Mm.39270	NM_178259	ENSMUSG00000004668	Abca13	9830132L24|A930002G16Rik|AI956815	ATP-binding cassette, sub-family A (ABC1), member 13	protein-coding	chr11:9817208-9818923	1.78827	0.344947	15.57	21.93	12.28	8.69	11.77	14.57	chr11-24288	chr11-25001		chr11-18309			chr11-1225	chr11-32172
Merged-chr10-91234463-2	chr10	91233881	91235434	+	12.74	CONTROL-1_Peaks|Flag-3_Peaks	Intergenic	B4|SINE|B4	-14038	NR_151510	102633753	Mm.416936	NR_151510		4930534H03Rik	-	RIKEN cDNA 4930534H03 gene	ncRNA	chr10:91233881-91235434	1.76528	0.136239	18.46	15.61	9.47	9.83	10.03	13.72	chr10-19861						chr10-741
Merged-chr2-163492359-2	chr2	163491990	163492729	+	5.69	Flag-3_Peaks|H2A2_Peaks	promoter-TSS (NM_001099331)	promoter-TSS (NM_001099331)	41	NM_001099331	100043899	Mm.442535	NM_001099331	ENSMUSG00000078949	R3hdml	-	R3H domain containing-like	protein-coding	chr2:163491990-163492729	1.76243	0.420833	3.62	5.95	3.16	2.27	8.29	7.29							chr2-7788	chr2-43228
Merged-chr17-69616009-3	chr17	69615703	69616360	+	8.43667	CONTROL-1_Peaks|CONTROL-2_Peaks|Flag-3_Peaks	Intergenic	Intergenic	176705	NM_001145192	320722	Mm.400254	NM_001145192	ENSMUSG00000091636	Akain1	A330050F15Rik	A kinase (PRKA) anchor inhibitor 1	protein-coding	chr17:69615703-69616360	1.76177	0.254776	9.05	10.03	6.67	4.16	9.16	7.72	chr17-15196	chr17-18377					chr17-1567
Merged-chr15-82257379-2	chr15	82257045	82257706	+	8.185	Flag-3_Peaks|H2A2_Peaks	intron (NR_037698, intron 1 of 1)	intron (NR_037698, intron 1 of 1)	1352	NR_037698	76505	Mm.23023	NR_037697	ENSMUSG00000068099	1500009C09Rik	-	RIKEN cDNA 1500009C09 gene	ncRNA	chr15:82257045-82257706	1.74525	0.189117	8.33	10.03	5.61	4.91	9.16	9.86							chr15-479	chr15-21269
Merged-chr17-83524906-2	chr17	83524633	83525180	+	8.55	CP27-2_Peaks|Flag-3_Peaks	Intergenic	Intergenic	-10573	NM_009187	20463	Mm.30072	NM_009187	ENSMUSG00000024248	Cox7a2l	COX7AR|COX7RP|EB1|SIG-81|SIG81|Silg81	cytochrome c oxidase subunit 7A2 like	protein-coding	chr17:83524633-83525180	1.71591	0.0774836	13.03	12.64	7.02	7.94	9.16	9					chr17-12773		chr17-222
Merged-chr6-32752505-2	chr6	32752196	32752814	+	6.165	CONTROL-1_Peaks|Flag-3_Peaks	Intergenic	Intergenic	-164313	NM_175750	243743	Mm.444029	NM_175750	ENSMUSG00000029765	Plxna4	9330117B14|Plxa4|mKIAA1550	plexin A4	protein-coding	chr6:32752196-32752814	1.70554	0.157196	7.24	4.46	4.21	2.65	6.54	2.57	chr6-25907						chr6-1926
Merged-chr4-123681508-3	chr4	123680836	123682014	+	9.45667	CONTROL-1_Peaks|Flag-3_Peaks|H2A2_Peaks	intron (NM_001199136, intron 1 of 97)	intron (NM_001199136, intron 1 of 97)	2935	NM_001199137	11426	Mm.402299	NM_009600	ENSMUSG00000028649	Macf1	ABP620|Acf7|Aclp7|MACF|R74989|mKIAA0465	microtubule-actin crosslinking factor 1	protein-coding	chr4:123680836-123682014	1.70046	0.315314	13.4	12.26	5.26	9.83	11.77	19.29	chr4-34712						chr4-7521	chr4-17169
Merged-chr10-11450167-5	chr10	11449821	11450564	+	7.92	CONTROL-1_Peaks|CONTROL-2_Peaks|CP27-2_Peaks|Flag-3_Peaks|H2A2_Peaks	intron (NM_010146, intron 3 of 3)	intron (NM_010146, intron 3 of 3)	106747	NM_010146	13853	Mm.89946	NM_010146	ENSMUSG00000055493	Epm2a	TG-B|Tg(TcraK,TcrbK)TG-BFlv	epilepsy, progressive myoclonic epilepsy, type 2 gene alpha	protein-coding	chr10:11449821-11450564	1.69826	0.0138517	11.95	11.52	7.02	6.8	6.98	10.72	chr10-11149	chr10-11269			chr10-19726		chr10-968	chr10-18045
Merged-chr17-5377225-2	chr17	5376941	5377509	+	7.605	CONTROL-2_Peaks|Flag-3_Peaks	Intergenic	Intergenic	41542	NM_175349	106557	Mm.432764	NM_175349	ENSMUSG00000101959	Ldhal6b	4933402O15Rik|AI326310|LDHL|Ldhal	lactate dehydrogenase A-like 6B	protein-coding	chr17:5376941-5377509	1.66818	0.0924555	6.88	7.8	3.51	5.29	8.72	6.43		chr17-15897					chr17-631
Merged-chr1-51838644-2	chr1	51838218	51839070	+	7.04	CONTROL-1_Peaks|Flag-3_Peaks	intron (NM_001161817, intron 3 of 30)	intron (NM_001161817, intron 3 of 30)	77334	NM_001161817	17912	Mm.3390	NM_010863	ENSMUSG00000018417	Myo1b	AA406997|MIH-L|MMIa	myosin IB	protein-coding	chr1:51838218-51839070	1.65836	0.0808147	9.78	8.18	6.67	4.16	7.85	8.14	chr1-21330						chr1-7842
Merged-chr2-27126317-2	chr2	27125874	27126762	+	8.305	Flag-3_Peaks|H2A2_Peaks	intron (NM_175427, intron 1 of 2)	intron (NM_175427, intron 1 of 2)	16159	NM_175427	109349	Mm.314080	NM_175427	ENSMUSG00000009216	Fam163b	C630035N08Rik	family with sequence similarity 163, member B	protein-coding	chr2:27125874-27126762	1.65103	0.0553018	7.6	9.29	4.56	5.67	9.59	14.15							chr2-3796	chr2-20768
Merged-chr15-80349226-2	chr15	80348785	80349667	+	7.835	CONTROL-1_Peaks|Flag-3_Peaks	intron (NM_001044308, intron 6 of 36)	intron (NM_001044308, intron 6 of 36)	61988	NM_001044308	239556	Mm.291058	NM_001044308	ENSMUSG00000022416	Cacna1i	Ca(V)3.3	calcium channel, voltage-dependent, alpha 1I subunit	protein-coding	chr15:80348785-80349667	1.64171	0.0399346	13.4	12.26	8.07	7.56	10.9	12	chr15-17033						chr15-1471
Merged-chr5-47984760-9	chr5	47981634	47986998	+	56.6456	CONTROL-1_Peaks|CONTROL-2_Peaks|CP27-1_Peaks|CP27-2_Peaks|Flag-3_Peaks|H2A2_Peaks	non-coding (NR_111900, exon 1 of 36)	non-coding (NR_111900, exon 1 of 36)	1161	NM_001291228	20563	Mm.289739	NM_178804	ENSMUSG00000031558	Slit2	Drad-1|E030015M03Rik|E130320P19Rik|Slil3|b2b1200.1Clo|mKIAA4141|slit-2	slit guidance ligand 2	protein-coding	chr5:47981634-47986998	1.64055	0.0110007	128.53	135.27	76.14	84.66	34.45	167.18	chr5-14537	chr5-18276		chr5-20173,chr5-15289,chr5-10549	chr5-14927,chr5-12071		chr5-1778	chr5-12460
Merged-chr17-75874999-2	chr17	75874538	75875460	+	6.2	Flag-3_Peaks|H2A2_Peaks	intron (NR_033456, intron 2 of 4)	ORR1E-int|LTR|ERVL-MaLR	13976	NR_033456	100043885	Mm.127562	NR_033456	ENSMUSG00000117539	Gm4710	-	predicted gene 4710	ncRNA	chr17:75874538-75875460	1.63297	0.156528	6.88	6.69	4.91	3.4	7.41	8.57							chr17-2994	chr17-20765
Merged-chr6-4804400-2	chr6	4803930	4804870	+	7.825	CONTROL-2_Peaks|Flag-3_Peaks	Intergenic	(CA)n|Simple_repeat|Simple_repeat	11928	NR_157243	102637299	Mm.402076	NR_157243	ENSMUSG00000093570	Gm20714	-	predicted gene 20714	ncRNA	chr6:4803930-4804870	1.62077	0.112256	5.07	9.29	2.81	6.05	9.59	2.57		chr6-18826					chr6-362
Merged-chr1-57095806-3	chr1	57095329	57096400	+	7.17333	CONTROL-2_Peaks|CP27-2_Peaks|Flag-3_Peaks	Intergenic	Intergenic	-115616	NM_001358580	212712	Mm.145599	NM_139146	ENSMUSG00000038331	Satb2	BAP002|mKIAA1034	special AT-rich sequence binding protein 2	protein-coding	chr1:57095329-57096400	1.61449	0.315955	14.84	13.01	6.67	10.58	10.03	8.57		chr1-20470			chr1-27453		chr1-7874
Merged-chr15-97435993-2	chr15	97435611	97436440	+	9.74	CONTROL-2_Peaks|Flag-3_Peaks	Intergenic	RMER19B2|LTR|ERVK	-188738	NM_001164602	105827	Mm.24005	NM_178114	ENSMUSG00000048218	Amigo2	AI415330|AMIGO-2|AW208913|Ali1	adhesion molecule with Ig like domain 2	protein-coding	chr15:97435611-97436440	1.60806	0.205371	7.97	10.78	5.61	6.05	12.21	6.43		chr15-21446					chr15-917
Merged-chr5-108718318-2	chr5	108717999	108718637	+	6.545	Flag-3_Peaks|H2A2_Peaks	Intergenic	Intergenic	24089	NM_054071	116701	Mm.35691	NM_054071	ENSMUSG00000008090	Fgfrl1	FGFR5|FGFR5beta|FGFR5gamma	fibroblast growth factor receptor-like 1	protein-coding	chr5:108717999-108718637	1.60592	0.27085	6.88	6.69	3.16	5.29	8.29	7.29							chr5-482	chr5-23969
Merged-chr10-112888496-4	chr10	112887966	112888959	+	10.835	CONTROL-1_Peaks|CONTROL-2_Peaks|Flag-3_Peaks|H2A2_Peaks	Intergenic	Intergenic	40564	NM_001033474	382423	Mm.431239	NM_001033474	ENSMUSG00000074748	Atxn7l3b	4921506J03Rik|6230409E21Rik|AI315132	ataxin 7-like 3B	protein-coding	chr10:112887966-112888959	1.60385	0.149138	14.48	13.01	8.07	9.07	10.03	23.58	chr10-20195	chr10-13624					chr10-479	chr10-11069
Merged-chr17-46435207-2	chr17	46434744	46435605	+	8.26	CONTROL-2_Peaks|Flag-3_Peaks	intron (NM_144856, intron 4 of 9)	intron (NM_144856, intron 4 of 9)	3303	NM_144856	108114	Mm.387538	NM_144856	ENSMUSG00000067144	Slc22a7	NLT|OAT2	solute carrier family 22 (organic anion transporter), member 7	protein-coding	chr17:46434744-46435605	1.59102	0.164319	9.78	10.41	7.02	5.67	10.03	8.57		chr17-16536					chr17-1360
Merged-chr15-89007953-3	chr15	89007589	89008290	+	7.48667	CONTROL-2_Peaks|Flag-3_Peaks|H2A2_Peaks	intron (NM_031260, intron 13 of 26)	intron (NM_031260, intron 13 of 26)	24945	NM_031260	83456	Mm.358791	NM_031260	ENSMUSG00000015365	Mov10l1	CHAMP|Csm	Mov10 like RISC complex RNA helicase 1	protein-coding	chr15:89007589-89008290	1.55818	0.142812	9.41	10.41	6.67	6.05	7.41	12		chr15-14099					chr15-5413	chr15-28752
Merged-chr2-180600613-5	chr2	180599742	180601670	+	25.512	CONTROL-1_Peaks|CONTROL-2_Peaks|CP27-1_Peaks|Flag-3_Peaks|H2A2_Peaks	intron (NM_009936, intron 4 of 31)	intron (NM_009936, intron 4 of 31)	2484	NM_009936	12841	Mm.141312	NM_009936	ENSMUSG00000027570	Col9a3	AV006866	collagen, type IX, alpha 3	protein-coding	chr2:180599742-180601670	1.55045	0.0833262	44.89	50.54	30.18	31.37	16.57	30.01	chr2-21427	chr2-23589		chr2-14180			chr2-7963	chr2-12423
Merged-chr15-82063013-2	chr15	82062628	82063399	+	7.4	CONTROL-1_Peaks|Flag-3_Peaks	exon (NM_001166475, exon 2 of 2)	exon (NM_001166475, exon 2 of 2)	3862	NM_001166475	328573	Mm.399189	NM_001166475	ENSMUSG00000075524	4930407I10Rik	Gm747	RIKEN cDNA 4930407I10 gene	protein-coding	chr15:82062628-82063399	1.54734	0.282177	10.5	11.89	8.42	6.05	7.41	12.43	chr15-18569						chr15-5111
Merged-chr6-82814835-4	chr6	82814077	82815490	+	8.105	CONTROL-2_Peaks|CP27-2_Peaks|Flag-3_Peaks|H2A2_Peaks	Intergenic	Intergenic	-40329	NM_013820	15277	Mm.255848	NM_013820	ENSMUSG00000000628	Hk2	AI642394|HKII	hexokinase 2	protein-coding	chr6:82814077-82815490	1.54674	0.221282	19.19	21.18	9.47	16.63	9.59	16.29		chr6-25232			chr6-11095		chr6-2272	chr6-26625
Merged-chr4-110020556-5	chr4	110020059	110021547	+	15.082	CONTROL-1_Peaks|CONTROL-2_Peaks|CP27-1_Peaks|CP27-2_Peaks|Flag-3_Peaks	Intergenic	Intergenic	42778	NM_172296	242620	Mm.32825	NM_172296	ENSMUSG00000047143	Dmrta2	Dmrt5	doublesex and mab-3 related transcription factor like family A2	protein-coding	chr4:110020059-110021547	1.54174	0.0077264	26.43	27.5	16.84	18.14	13.95	30.43	chr4-10111	chr4-10090		chr4-11628	chr4-15126		chr4-7059
Merged-chr17-31814176-2	chr17	31813832	31814520	+	7.675	CONTROL-2_Peaks|Flag-3_Peaks	Intergenic	Intergenic	41628	NM_010831	17691	Mm.290941	NM_010831	ENSMUSG00000024042	Sik1	Hrt-20|Msk|Sik|Sik-1|Snf1lk	salt inducible kinase 1	protein-coding	chr17:31813832-31814520	1.53776	0.372379	6.15	8.92	5.26	4.54	10.47	4.29		chr17-17730					chr17-489
Merged-chr11-99154672-4	chr11	99153476	99155618	+	12.7975	CONTROL-1_Peaks|CONTROL-2_Peaks|Flag-3_Peaks|H2A2_Peaks	intron (NM_007719, intron 1 of 2)	intron (NM_007719, intron 1 of 2)	530	NM_001301713	12775	Mm.2932	NM_007719	ENSMUSG00000037944	Ccr7	CC-CKR-7|CCR-7|CD197|Cdw197|Cmkbr7|EBI1|Ebi1h	chemokine (C-C motif) receptor 7	protein-coding	chr11:99153476-99155618	1.53327	0.138544	23.9	25.64	17.19	15.12	16.14	24.86	chr11-20753	chr11-16706					chr11-1755	chr11-29617
Merged-chr17-34564475-5	chr17	34563684	34565452	+	18.044	CONTROL-1_Peaks|CONTROL-2_Peaks|CP27-1_Peaks|CP27-2_Peaks|Flag-3_Peaks	intron (NM_010929, intron 1 of 29)	intron (NM_010929, intron 1 of 29)	273	NM_010929	18132	Mm.173813	NM_010929	ENSMUSG00000015468	Notch4	Int-3|Int3|N4	notch 4	protein-coding	chr17:34563684-34565452	1.51722	0.246835	32.95	32.7	17.19	26.08	22.24	34.29	chr17-17158	chr17-13206		chr17-14834	chr17-14447		chr17-350
Merged-chr10-95165667-3	chr10	95165068	95166470	+	11.9933	CONTROL-1_Peaks|CONTROL-2_Peaks|Flag-3_Peaks	Intergenic	MTB|LTR|ERVL-MaLR	-19944	NR_131146	628062		NR_131146	ENSMUSG00000112481	Gm29684	-	predicted gene, 29684	ncRNA	chr10:95165068-95166470	1.51388	0.0557345	18.83	20.44	11.58	14.36	13.52	14.15	chr10-28390	chr10-26758					chr10-757
Merged-chr15-36630865-6	chr15	36629202	36632875	+	55.84	CONTROL-1_Peaks|CONTROL-2_Peaks|CP27-1_Peaks|CP27-2_Peaks|Flag-3_Peaks|H2A2_Peaks	Intergenic	Intergenic	-22065	NM_008774	18458	Mm.371570	NM_008774	ENSMUSG00000022283	Pabpc1	PABP|Pabp1|PabpI|Pabpl1|ePAB	poly(A) binding protein, cytoplasmic 1	protein-coding	chr15:36629202-36632875	1.50937	0.0279253	113.32	104.06	78.25	65.77	27.91	99.88	chr15-26219	chr15-18440		chr15-2947	chr15-5658		chr15-1135	chr15-6515
Merged-chr17-26452186-5	chr17	26451628	26452819	+	19.568	CONTROL-1_Peaks|CONTROL-2_Peaks|CP27-2_Peaks|Flag-3_Peaks|H2A2_Peaks	Intergenic	Intergenic	37364	NM_001081656	240055	Mm.133211	NM_001081656	ENSMUSG00000034413	Neurl1b	C230078M08Rik|EG240055	neuralized E3 ubiquitin protein ligase 1B	protein-coding	chr17:26451628-26452819	1.50617	0.229998	24.98	36.05	18.6	21.92	10.9	35.58	chr17-7194	chr17-4997			chr17-8493		chr17-2119	chr17-5430
Merged-chr11-49961333-2	chr11	49960953	49961714	+	6.14	Flag-3_Peaks|H2A2_Peaks	intron (NM_029004, intron 6 of 13)	intron (NM_029004, intron 6 of 13)	59172	NM_001347462	74563	Mm.258798	NM_029004	ENSMUSG00000020374	Rasgef1c	9130006A14Rik	RasGEF domain family, member 1C	protein-coding	chr11:49960953-49961714	1.50492	0.544165	3.98	5.2	4.21	1.89	7.85	5.57							chr11-725	chr11-32559
Merged-chr15-61418208-4	chr15	61417729	61418926	+	9.2875	CONTROL-1_Peaks|CONTROL-2_Peaks|Flag-3_Peaks|H2A2_Peaks	Intergenic	L2b|LINE|L2	356124	NR_040350	432956	Mm.404918	NR_040350	ENSMUSG00000116031	D030024E09Rik	-	RIKEN cDNA D030024E09 gene	ncRNA	chr15:61417729-61418926	1.49588	0.254887	10.5	18.58	7.72	11.72	11.77	13.29	chr15-35812	chr15-11406					chr15-1260	chr15-19750
Merged-chr17-78525122-5	chr17	78524502	78525941	+	13.69	CONTROL-1_Peaks|CONTROL-2_Peaks|CP27-1_Peaks|CP27-2_Peaks|Flag-3_Peaks	intron (NM_001197028, intron 1 of 12)	intron (NM_001197028, intron 1 of 12)	17158	NM_028813	74199	Mm.292983	NM_028813	ENSMUSG00000024076	Vit	1700052E02Rik|1700110E08Rik|2810429K11Rik|AKH|akhirin	vitrin	protein-coding	chr17:78524502-78525941	1.49458	0.284649	28.96	23.41	16.14	18.9	13.95	26.58	chr17-7635	chr17-7642		chr17-22360	chr17-15130		chr17-3023
Merged-chr12-4188590-6	chr12	4188026	4189259	+	19.7833	CONTROL-1_Peaks|CONTROL-2_Peaks|CP27-1_Peaks|CP27-2_Peaks|Flag-3_Peaks|H2A2_Peaks	intron (NM_001159537, intron 3 of 21)	intron (NM_001159537, intron 3 of 21)	45323	NM_134046	52504	Mm.70546	NM_134046	ENSMUSG00000020652	Cenpo	2810429O05Rik|8430427C03Rik|D12Ertd482e	centromere protein O	protein-coding	chr12:4188026-4189259	1.49252	0.100431	27.15	26.76	16.84	19.28	13.95	33.86	chr12-10162	chr12-6063		chr12-3405	chr12-3059		chr12-200	chr12-8403
Merged-chr4-83517956-2	chr4	83517628	83518426	+	10.625	CONTROL-2_Peaks|Flag-3_Peaks	Intergenic	ORR1D1|LTR|ERVL-MaLR	-7518	NM_001355549	320226	Mm.180032	NM_029117	ENSMUSG00000052407	Ccdc171	4930418J05Rik|4930473A06Rik|A330015D16Rik	coiled-coil domain containing 171	protein-coding	chr4:83517628-83518426	1.48953	0.479658	6.88	13.75	6.67	7.18	9.16	8.57		chr4-16823					chr4-1239
Merged-chr4-86285151-6	chr4	86284297	86285986	+	18.1167	CONTROL-1_Peaks|CONTROL-2_Peaks|CP27-1_Peaks|CP27-2_Peaks|Flag-3_Peaks|H2A2_Peaks	intron (NM_029967, intron 13 of 27)	intron (NM_029967, intron 13 of 27)	231166	NM_001368621	77739	Mm.331690	NM_029967	ENSMUSG00000066113	Adamtsl1	5930437A14Rik|6720426B09Rik|ADAMTSL-1	ADAMTS-like 1	protein-coding	chr4:86284297-86285986	1.47677	0.245596	35.84	37.91	28.77	21.17	12.65	23.15	chr4-23033	chr4-21865		chr4-8835	chr4-26692		chr4-3612	chr4-11193
Merged-chr15-80010600-3	chr15	80010278	80010967	+	8.72	CONTROL-1_Peaks|CONTROL-2_Peaks|Flag-3_Peaks	intron (NM_011057, intron 1 of 6)	intron (NM_011057, intron 1 of 6)	4355	NM_011057	18591	Mm.144089	NM_011057	ENSMUSG00000000489	Pdgfb	PDGF-2|PDGF-B|Sis|c-sis	platelet derived growth factor, B polypeptide	protein-coding	chr15:80010278-80010967	1.47042	0.224632	11.59	9.29	7.02	7.18	8.29	12	chr15-13756	chr15-19301					chr15-5030
Merged-chr7-112118247-5	chr7	112117872	112118619	+	7.626	CONTROL-1_Peaks|CONTROL-2_Peaks|CP27-1_Peaks|Flag-3_Peaks|H2A2_Peaks	exon (NM_001360261, exon 7 of 7)	exon (NM_001360261, exon 7 of 7)	40451	NM_001360260	50781	Mm.55143	NM_015814	ENSMUSG00000030772	Dkk3	AW061014|C87148|dkk-3|mDkk-3	dickkopf WNT signaling pathway inhibitor 3	protein-coding	chr7:112117872-112118619	1.45991	0.503648	10.14	11.89	10.18	4.91	7.85	8.14	chr7-13911	chr7-14990		chr7-14494			chr7-1572	chr7-27856
Merged-chr2-126288298-3	chr2	126287564	126288798	+	11.2367	CONTROL-2_Peaks|CP27-2_Peaks|Flag-3_Peaks	Intergenic	Intergenic	136040	NM_026981	69185	Mm.29019	NM_026981	ENSMUSG00000023330	Dtwd1	1810033A06Rik	DTW domain containing 1	protein-coding	chr2:126287564-126288798	1.45983	0.0811489	19.19	19.7	12.28	14.36	8.72	18.43		chr2-11478			chr2-22363		chr2-6201
Merged-chr7-82110479-5	chr7	82109285	82111446	+	17.882	CONTROL-1_Peaks|CONTROL-2_Peaks|CP27-1_Peaks|Flag-3_Peaks|H2A2_Peaks	Intergenic	Lx2|LINE|L1	39978	NR_045744	434205	Mm.333986	NR_045744	ENSMUSG00000109145	Gm20744	-	predicted gene, 20744	ncRNA	chr7:82109285-82111446	1.45862	0.334262	38.74	28.24	22.11	23.81	13.08	32.58	chr7-13104	chr7-14794		chr7-15333			chr7-1486	chr7-16283
Merged-chr17-11735634-5	chr17	11735115	11736087	+	11.238	CONTROL-1_Peaks|CONTROL-2_Peaks|CP27-2_Peaks|Flag-3_Peaks|H2A2_Peaks	intron (NM_016694, intron 7 of 11)	intron (NM_016694, intron 7 of 11)	147588	NR_045808	52027	Mm.442257	NR_045808		D17Ertd648e	-	DNA segment, Chr 17, ERATO Doi 648, expressed	ncRNA	chr17:11735115-11736087	1.45723	0.345765	13.03	21.55	10.88	12.85	11.77	21	chr17-18149	chr17-9428			chr17-11183		chr17-1907	chr17-10949
Merged-chr4-118471491-4	chr4	118470514	118472396	+	21.67	CONTROL-1_Peaks|CONTROL-2_Peaks|CP27-1_Peaks|Flag-3_Peaks	3' UTR (NM_011587, exon 23 of 23)	3' UTR (NM_011587, exon 23 of 23)	-13942	NM_001285497	17480	Mm.4864	NM_010823	ENSMUSG00000006389	Mpl	CD110|TPO-R|c-mpl|hlb219	myeloproliferative leukemia virus oncogene	protein-coding	chr4:118470514-118472396	1.45575	0.134886	36.93	40.88	27.37	26.08	16.14	47.58	chr4-7158	chr4-6058		chr4-17106			chr4-2428
Merged-chr10-80509942-6	chr10	80508654	80511040	+	67.2	CONTROL-1_Peaks|CONTROL-2_Peaks|CP27-1_Peaks|CP27-2_Peaks|Flag-3_Peaks|H2A2_Peaks	intron (NM_139226, intron 1 of 1)	intron (NM_139226, intron 1 of 1)	14941	NM_139226	246086	Mm.250572	NM_139226	ENSMUSG00000045518	Onecut3	OC-3|Oc3	one cut domain, family member 3	protein-coding	chr10:80508654-80511040	1.45371	0.0143001	97.39	95.14	66.67	65.77	24.42	105.02	chr10-8289	chr10-16926		chr10-13894	chr10-6747		chr10-77	chr10-7830
Merged-chr4-152650681-3	chr4	152649624	152651243	+	9.55333	CONTROL-2_Peaks|Flag-3_Peaks|H2A2_Peaks	Intergenic	Intergenic	-47107	NR_033138	330004	Mm.291863	NM_001033414		Gm833	-	predicted gene 833	ncRNA	chr4:152649624-152651243	1.45309	0.00203826	15.93	14.12	11.23	9.45	10.9	21		chr4-33123					chr4-7978	chr4-46011
Merged-chr7-18859231-12	chr7	18856183	18861751	+	28.1858	CONTROL-1_Peaks|CONTROL-2_Peaks|CP27-1_Peaks|CP27-2_Peaks|Flag-3_Peaks|H2A2_Peaks	TTS (NM_153761)	TTS (NM_153761)	19001	NM_153760	243864	Mm.233503	NM_153760	ENSMUSG00000040987	Mill2	Micb	MHC I like leukocyte 2	protein-coding	chr7:18856183-18861751	1.45167	0.131553	93.41	104.06	69.13	66.9	26.6	114.45	chr7-10962,chr7-23405	chr7-11527,chr7-18921		chr7-12266,chr7-14766,chr7-9100	chr7-10683,chr7-8388		chr7-425	chr7-17999,chr7-7560
Merged-chr11-84540069-6	chr11	84539179	84541097	+	34.5133	CONTROL-1_Peaks|CONTROL-2_Peaks|CP27-1_Peaks|CP27-2_Peaks|Flag-3_Peaks|H2A2_Peaks	Intergenic	Intergenic	14478	NR_038057	78365	Mm.260345	NR_038057	ENSMUSG00000087211	Lhx1os	1500016L03Rik|Lhx1as	LIM homeobox 1, opposite strand	ncRNA	chr11:84539179-84541097	1.4494	0.138035	55.76	49.8	35.79	37.04	14.83	60.01	chr11-23476	chr11-15686		chr11-9566	chr11-10451		chr11-1057	chr11-16557
Merged-chr17-83110158-6	chr17	83109371	83111005	+	25.485	CONTROL-1_Peaks|CONTROL-2_Peaks|CP27-1_Peaks|CP27-2_Peaks|Flag-3_Peaks|H2A2_Peaks	Intergenic	Intergenic	-31963	NR_045094	100503434	Mm.187281	NR_045094	ENSMUSG00000117399	Gm19689	-	predicted gene, 19689	ncRNA	chr17:83109371-83111005	1.44829	0.0875686	44.17	41.25	29.12	29.86	26.17	32.58	chr17-12666	chr17-8990		chr17-8300	chr17-8762		chr17-5519	chr17-13332
Merged-chr10-122855464-2	chr10	122854894	122855892	+	8.975	CONTROL-1_Peaks|Flag-3_Peaks	intron (NM_176919, intron 4 of 8)	intron (NM_176919, intron 4 of 8)	130331	NR_029527	387251		NR_029527	ENSMUSG00000065406	Mirlet7i	Mirnlet7i|let-7i|mmu-let-7i	microRNA let7i	ncRNA	chr10:122854894-122855892	1.44729	0.192882	11.22	8.55	9.12	4.54	11.34	10.29	chr10-29341						chr10-299
Merged-chr15-63203304-3	chr15	63202878	63203854	+	9.21667	CONTROL-2_Peaks|Flag-3_Peaks|H2A2_Peaks	Intergenic	Intergenic	276242	NR_045279	432958	Mm.255105	NR_045279	ENSMUSG00000115520	Gm20740	-	predicted gene, 20740	ncRNA	chr15:63202878-63203854	1.44356	0.473413	9.41	14.12	9.12	7.18	8.29	12.43		chr15-23156					chr15-1272	chr15-18720
Merged-chr17-17826764-6	chr17	17825296	17828447	+	31.51	CONTROL-1_Peaks|CONTROL-2_Peaks|CP27-1_Peaks|CP27-2_Peaks|Flag-3_Peaks|H2A2_Peaks	Intergenic	Intergenic	-3317	NR_029536	387230		NR_029536	ENSMUSG00000065396	Mir99b	Mirn99b|mmu-mir-99b	microRNA 99b	ncRNA	chr17:17825296-17828447	1.4428	0.118788	47.43	49.05	29.83	37.04	26.6	71.59	chr17-22537	chr17-10993		chr17-12398	chr17-15668		chr17-1117	chr17-6773
Merged-chr6-126853382-6	chr6	126852532	126854542	+	14.24	CONTROL-1_Peaks|CONTROL-2_Peaks|CP27-1_Peaks|Flag-3_Peaks|H2A2_Peaks	intron (NM_009650, intron 1 of 5)	intron (NM_009650, intron 1 of 5)	439	NM_009650	11642	Mm.87748	NM_009650	ENSMUSG00000030344	Akap3	Prka3	A kinase (PRKA) anchor protein 3	protein-coding	chr6:126852532-126854542	1.43987	0.0889363	35.12	27.5	24.21	19.28	12.65	33.01	chr6-27757	chr6-18466,chr6-26095		chr6-15109			chr6-648	chr6-11079
Merged-chr3-37882696-2	chr3	37882329	37883063	+	6.125	Flag-3_Peaks|H2A2_Peaks	Intergenic	Intergenic	-16117	NR_040559	626410	Mm.389417	NR_040559	ENSMUSG00000106461	Gm20755	-	predicted gene, 20755	ncRNA	chr3:37882329-37883063	1.43511	0.0618839	8.33	8.92	5.97	6.05	6.98	9							chr3-248	chr3-29455
Merged-chr6-12192818-2	chr6	12192339	12193377	+	10.425	CONTROL-1_Peaks|Flag-3_Peaks	Intergenic	Intergenic	-83278	NR_003631	625347	Mm.389084	NM_001039041	ENSMUSG00000057223	Gm6578	EG625347	mitochondrial ribosomal protein L32 pseudogene	pseudo	chr6:12192339-12193377	1.42234	0.18794	13.03	10.78	8.42	8.32	9.59	8.57	chr6-18216						chr6-404
Merged-chr2-80194653-2	chr2	80194388	80194919	+	6.345	CONTROL-1_Peaks|Flag-3_Peaks	Intergenic	Lx4B|LINE|L1	-64995	NM_001355140	18573	Mm.40678	NM_016744	ENSMUSG00000059173	Pde1a	AI987702|AW125737	phosphodiesterase 1A, calmodulin-dependent	protein-coding	chr2:80194388-80194919	1.41883	0.64659	6.88	1.86	3.51	2.65	6.54	3.86	chr2-28084						chr2-7323
Merged-chr15-75714900-6	chr15	75713994	75715838	+	28.3133	CONTROL-1_Peaks|CONTROL-2_Peaks|CP27-1_Peaks|CP27-2_Peaks|Flag-3_Peaks|H2A2_Peaks	TTS (NM_001163465)	TTS (NM_001163465)	10628	NM_008164	14787	Mm.57052	NM_008164	ENSMUSG00000022580	Rhpn1	BB023497|Grbp|Rhophilin|mKIAA1929	rhophilin, Rho GTPase binding protein 1	protein-coding	chr15:75713994-75715838	1.41599	0.0183303	49.24	52.4	34.74	37.04	18.32	47.58	chr15-3779	chr15-2882		chr15-5651	chr15-6492		chr15-2582	chr15-5392
Merged-chr15-98336292-2	chr15	98335762	98336900	+	8.52	CONTROL-1_Peaks|Flag-3_Peaks	Intergenic	B4A|SINE|B4	4608	NM_146281	258278	Mm.377409	NM_146281	ENSMUSG00000051793	Olfr284	MOR160-4	olfactory receptor 284	protein-coding	chr15:98335762-98336900	1.4158	0.41798	12.31	6.69	7.37	6.05	9.59	7.72	chr15-14913						chr15-3035
Merged-chr17-87847505-4	chr17	87846930	87847907	+	6.9875	CONTROL-1_Peaks|CP27-1_Peaks|CP27-2_Peaks|Flag-3_Peaks	Intergenic	Intergenic	-49424	NM_199251	210741	Mm.312046	NM_199251	ENSMUSG00000050138	Kcnk12	mntk1	potassium channel, subfamily K, member 12	protein-coding	chr17:87846930-87847907	1.40318	0.213215	17.74	12.26	11.93	9.45	10.03	9.43	chr17-21942			chr17-22729	chr17-22440		chr17-3178
Merged-chr15-91586013-2	chr15	91585637	91586389	+	5.385	Flag-3_Peaks|H2A2_Peaks	Intergenic	Intergenic	-12752	NM_001033633	239606	Mm.360596	NM_001033633	ENSMUSG00000036298	Slc2a13	6530403A04|A630029G22Rik|AI505012|Gm308	solute carrier family 2 (facilitated glucose transporter), member 13	protein-coding	chr15:91585637-91586389	1.39964	0.0310989	8.33	7.43	5.97	5.29	7.41	5.14							chr15-5477	chr15-42830
Merged-chr15-100425231-2	chr15	100424824	100425639	+	7.695	CP27-1_Peaks|Flag-3_Peaks	intron (NR_040351, intron 1 of 2)	intron (NR_040351, intron 1 of 2)	2038	NR_040351	432982	Mm.234608	NM_001034883	ENSMUSG00000087444	Gm5475	EG432982	predicted gene 5475	ncRNA	chr15:100424824-100425639	1.39926	0.604134	6.52	8.55	7.37	3.4	10.47	8.57				chr15-21979			chr15-134
Merged-chr4-106259370-4	chr4	106258874	106259946	+	8.17	CONTROL-1_Peaks|CONTROL-2_Peaks|CP27-1_Peaks|Flag-3_Peaks	intron (NR_151521, intron 2 of 4)	Lx4A|LINE|L1	18197	NR_151521	105244641	Mm.404914	NR_151521		Gm12724	-	predicted gene 12724	ncRNA	chr4:106258874-106259946	1.39816	0.428235	9.78	13.01	9.12	7.18	12.21	9	chr4-26317	chr4-28078		chr4-24009			chr4-566
Merged-chr15-84235737-6	chr15	84234937	84236619	+	26.1233	CONTROL-1_Peaks|CONTROL-2_Peaks|CP27-1_Peaks|CP27-2_Peaks|Flag-3_Peaks|H2A2_Peaks	intron (NM_133167, intron 1 of 12)	intron (NM_133167, intron 1 of 12)	3735	NM_133167	170736	Mm.323892	NM_133167	ENSMUSG00000022438	Parvb	AI595373|AW742462|D15Gsk1|affixin	parvin, beta	protein-coding	chr15:84234937-84236619	1.39373	0.0516876	39.1	40.51	28.77	28.35	11.77	50.58	chr15-8545	chr15-26449		chr15-6190	chr15-8425		chr15-2798	chr15-14066
Merged-chr4-119254324-6	chr4	119252848	119255716	+	40.1833	CONTROL-1_Peaks|CONTROL-2_Peaks|CP27-1_Peaks|CP27-2_Peaks|Flag-3_Peaks|H2A2_Peaks	Intergenic	Intergenic	-1159	NM_153105	242653	Mm.130701	NM_153105	ENSMUSG00000066058	Cldn19	-	claudin 19	protein-coding	chr4:119252848-119255716	1.39119	0.285398	63.36	73.95	53.34	45.36	27.04	60.01	chr4-9656	chr4-18673		chr4-12451	chr4-20773		chr4-1447	chr4-22520
Merged-chr15-41494549-3	chr15	41493357	41495218	+	12.7967	CONTROL-1_Peaks|CP27-1_Peaks|Flag-3_Peaks	intron (NM_001358977, intron 1 of 16)	intron (NM_001358977, intron 1 of 16)	45184	NM_001358977	170719	Mm.254267	NM_130885	ENSMUSG00000022307	Oxr1	2210416C20Rik|C7|C7B	oxidation resistance 1	protein-coding	chr15:41493357-41495218	1.39056	0.196099	36.57	33.82	29.83	20.79	12.21	22.72	chr15-21416			chr15-12580			chr15-3978
Merged-chr19-42147530-5	chr19	42146526	42148846	+	35.27	CONTROL-1_Peaks|CONTROL-2_Peaks|CP27-2_Peaks|Flag-3_Peaks|H2A2_Peaks	exon (NM_183195, exon 1 of 2)	exon (NM_183195, exon 1 of 2)	297	NM_183195	277010	Mm.206250	NM_183195	ENSMUSG00000044345	Marveld1	AI504298|Mrvldc1	MARVEL (membrane-associating) domain containing 1	protein-coding	chr19:42146526-42148846	1.39013	0.0234786	55.39	57.6	38.95	42.33	18.75	54.87	chr19-2854	chr19-3235			chr19-7981		chr19-111	chr19-7006
Merged-chr4-68721174-6	chr4	68720648	68721680	+	11.8867	CONTROL-1_Peaks|CONTROL-2_Peaks|CP27-1_Peaks|CP27-2_Peaks|Flag-3_Peaks|H2A2_Peaks	Intergenic	MT2A|LTR|ERVL	233233	NM_019967	56710	Mm.248788	NM_019967	ENSMUSG00000028351	Brinp1	BRINP|Dbc1|Dbccr1|Fam5a	bone morphogenic protein/retinoic acid inducible neural specific 1	protein-coding	chr4:68720648-68721680	1.38474	0.169316	23.17	18.58	15.79	14.36	10.03	19.29	chr4-7659	chr4-9087		chr4-12137	chr4-10503		chr4-5237	chr4-14810
Merged-chr2-33348764-2	chr2	33348513	33349015	+	6.345	CONTROL-1_Peaks|Flag-3_Peaks	intron (NM_175211, intron 1 of 19)	L2a|LINE|L2	22730	NM_001290570	241308	Mm.274249	NM_175211	ENSMUSG00000038831	Ralgps1	5830418G11Rik|AI853783|AI854138|RALGEF2|RALGPS1A|RalGEF 2|mKIAA0351	Ral GEF with PH domain and SH3 binding motif 1	protein-coding	chr2:33348513-33349015	1.38331	0.427966	6.15	4.46	3.51	4.16	6.54	3.43	chr2-30114						chr2-7102
Merged-chr11-120713584-6	chr11	120712411	120714816	+	48.19	CONTROL-1_Peaks|CONTROL-2_Peaks|CP27-1_Peaks|CP27-2_Peaks|Flag-3_Peaks|H2A2_Peaks	promoter-TSS (NM_153545)	promoter-TSS (NM_153545)	154	NM_016665	20892	Mm.259716	NM_016665	ENSMUSG00000025144	Cenpx	Stra13	centromere protein X	protein-coding	chr11:120712411-120714816	1.38295	0.0021446	70.24	69.12	50.88	49.89	15.7	69.87	chr11-8248	chr11-11162		chr11-10523	chr11-18090		chr11-1945	chr11-26782
Merged-chr11-70027025-5	chr11	70026340	70027694	+	9.196	CONTROL-1_Peaks|CONTROL-2_Peaks|CP27-1_Peaks|CP27-2_Peaks|Flag-3_Peaks	intron (NM_001370671, intron 2 of 19)	CpG-2157	-2818	NM_001370674	13385	Mm.27256	NM_007864	ENSMUSG00000020886	Dlg4	Dlgh4|PSD-95|PSD95|SAP90|SAP90A	discs large MAGUK scaffold protein 4	protein-coding	chr11:70026340-70027694	1.38212	0.0557888	19.55	17.09	14.04	12.47	10.47	12.43	chr11-15448	chr11-25845		chr11-16456	chr11-20220		chr11-1500
Merged-chr15-11029656-2	chr15	11029194	11030276	+	10.625	CONTROL-2_Peaks|Flag-3_Peaks	TTS (NM_053077)	TTS (NM_053077)	8233	NM_178717	239336	Mm.209312	NM_178717	ENSMUSG00000060735	Rxfp3	BC053073|GPCR135|Rln3r1|Salpr	relaxin family peptide receptor 3	protein-coding	chr15:11029194-11030276	1.38064	0.136124	9.41	15.98	6.67	11.72	10.47	13.29		chr15-18249					chr15-1011
Merged-chr17-47958580-4	chr17	47957864	47959446	+	24.125	CONTROL-1_Peaks|CONTROL-2_Peaks|Flag-3_Peaks|H2A2_Peaks	Intergenic	Intergenic	-34023	NM_028767	74123	Mm.240062	NM_028767	ENSMUSG00000023991	Foxp4	1200010K03Rik|2310007G05Rik|mFKHLA	forkhead box P4	protein-coding	chr17:47957864-47959446	1.37793	0.0462182	32.95	31.22	23.51	23.06	13.52	32.58	chr17-10590	chr17-11242					chr17-373	chr17-9336
Merged-chr2-32646950-2	chr2	32646545	32647355	+	5.37	Flag-3_Peaks|H2A2_Peaks	5' UTR (NM_007932, exon 1 of 15)	5' UTR (NM_007932, exon 1 of 15)	355	NM_001146348	13805	Mm.225297	NM_007932	ENSMUSG00000026814	Eng	AI528660|AI662476|CD105|Endo|S-endoglin	endoglin	protein-coding	chr2:32646545-32647355	1.37734	0.0301558	6.88	9.29	4.56	7.18	6.98	5.57							chr2-7086	chr2-40732
Merged-chr1-136402379-7	chr1	136400258	136404526	+	39.7271	CONTROL-1_Peaks|CONTROL-2_Peaks|CP27-1_Peaks|CP27-2_Peaks|Flag-3_Peaks|H2A2_Peaks	Intergenic	L1MB8|LINE|L1	-12879	NM_026500	67997	Mm.385462	NM_026500	ENSMUSG00000026404	Ddx59	1210002B07Rik|4833411G06Rik	DEAD (Asp-Glu-Ala-Asp) box polypeptide 59	protein-coding	chr1:136400258-136404526	1.36906	0.176929	93.77	86.96	62.46	69.55	32.71	94.31	chr1-12095	chr1-19670		chr1-21521	chr1-16712		chr1-5930	chr1-42056,chr1-25818
Merged-chr17-84026389-5	chr17	84025545	84027448	+	17.136	CONTROL-1_Peaks|CONTROL-2_Peaks|CP27-1_Peaks|Flag-3_Peaks|H2A2_Peaks	Intergenic	Intergenic	27944	NR_130994	78148	Mm.243918	NR_130994	ENSMUSG00000117431	8430430B14Rik	-	RIKEN cDNA 8430430B14 gene	ncRNA	chr17:84025545-84027448	1.36608	0.117717	28.96	27.5	22.81	18.52	14.39	31.29	chr17-11321	chr17-10313		chr17-6812			chr17-1695	chr17-8702
Merged-chr6-52165179-6	chr6	52163354	52166363	+	32.2017	CONTROL-1_Peaks|CONTROL-2_Peaks|CP27-1_Peaks|CP27-2_Peaks|Flag-3_Peaks|H2A2_Peaks	promoter-TSS (NM_010451)	promoter-TSS (NM_010451)	-27	NM_010451	15399	Mm.131	NM_010451	ENSMUSG00000014704	Hoxa2	AI324701|HOX1.11|Hox-1.11	homeobox A2	protein-coding	chr6:52163354-52166363	1.36399	0.0484602	55.39	59.09	38.95	44.98	24.42	53.15	chr6-26426	chr6-9087		chr6-13364	chr6-9109		chr6-2124	chr6-9053
Merged-chr15-94323944-3	chr15	94323474	94324409	+	9.73667	CONTROL-1_Peaks|Flag-3_Peaks|H2A2_Peaks	intron (NM_177431, intron 27 of 38)	RMER6A|LTR|ERVK	76739	NR_045629	328594	Mm.135523	NR_045629		D630010B17Rik	Gm811	RIKEN cDNA D630010B17 gene	ncRNA	chr15:94323474-94324409	1.36319	0.184763	11.59	10.78	7.72	8.69	11.77	15.43	chr15-18710						chr15-5544	chr15-17931
Merged-chr11-75678655-7	chr11	75677280	75680164	+	42.1543	CONTROL-1_Peaks|CONTROL-2_Peaks|CP27-1_Peaks|CP27-2_Peaks|Flag-3_Peaks|H2A2_Peaks	promoter-TSS (NM_001277221)	promoter-TSS (NM_001277221)	-537	NM_001277219	12928	Mm.280125	NM_133656	ENSMUSG00000017776	Crk	Crk-I|Crk-II|Crk-III|Crk3|CrkIII|Crko|c-Crk|p38	v-crk avian sarcoma virus CT10 oncogene homolog	protein-coding	chr11:75677280-75680164	1.36264	0.0729677	76.39	77.67	58.25	54.81	16.14	58.3	chr11-11942	chr11-15599		chr11-9533	chr11-15413		chr11-783	chr11-31012,chr11-14208
Merged-chr15-78493711-6	chr15	78492709	78495018	+	32.5417	CONTROL-1_Peaks|CONTROL-2_Peaks|CP27-1_Peaks|CP27-2_Peaks|Flag-3_Peaks|H2A2_Peaks	intron (NM_008368, intron 1 of 9)	intron (NM_008368, intron 1 of 9)	1203	NM_008368	16185	Mm.35287	NM_008368	ENSMUSG00000068227	Il2rb	CD122|IL-15Rbeta|IL15Rbeta|Il-2/15Rbeta|Il-2Rbeta|p70	interleukin 2 receptor, beta chain	protein-coding	chr15:78492709-78495018	1.36125	0.0352047	55.03	49.8	40.35	36.66	19.62	48.44	chr15-5360	chr15-13082		chr15-9953	chr15-9390		chr15-4953	chr15-9110
Merged-chr4-62697771-4	chr4	62696380	62698760	+	25.8275	CONTROL-1_Peaks|CONTROL-2_Peaks|Flag-3_Peaks|H2A2_Peaks	intron (NM_134257, intron 12 of 15)	intron (NM_134257, intron 12 of 15)	23596	NM_001310706	50780	Mm.286753	NM_019492	ENSMUSG00000059810	Rgs3	4930506N09Rik|C2PA-RGS3|C2pa|PDZ-RGS3|RGS3S	regulator of G-protein signaling 3	protein-coding	chr4:62696380-62698760	1.347	0.261725	47.79	49.8	40.7	31.75	13.08	69.44	chr4-8701	chr4-7940					chr4-2849	chr4-24699
Merged-chr7-35948482-2	chr7	35948061	35948903	+	7.04	CONTROL-1_Peaks|Flag-3_Peaks	Intergenic	Intergenic	-145493	NM_177739	668501	Mm.286296	NM_177739	ENSMUSG00000044452	Zfp507	1810022O10Rik|A230056M16Rik|AL024009|AU021817|BB105092|Gm480|Znf507|mKIAA1084	zinc finger protein 507	protein-coding	chr7:35948061-35948903	1.34632	0.626557	8.33	4.46	4.21	5.29	7.41	5.14	chr7-16091						chr7-681
Merged-chr17-46441252-2	chr17	46440967	46441538	+	5.69	Flag-3_Peaks|H2A2_Peaks	Intergenic	Intergenic	-2775	NM_144856	108114	Mm.387538	NM_144856	ENSMUSG00000067144	Slc22a7	NLT|OAT2	solute carrier family 22 (organic anion transporter), member 7	protein-coding	chr17:46440967-46441538	1.34426	0.543388	4.71	5.95	4.91	3.02	6.11	6.86							chr17-4495	chr17-23279
Merged-chr7-3446924-3	chr7	3446621	3447258	+	7.60333	CONTROL-1_Peaks|CONTROL-2_Peaks|Flag-3_Peaks	Intergenic	RSINE1|SINE|B4	22277	NM_133183	54378	Mm.424047	NM_133183	ENSMUSG00000078815	Cacng6	2310033H20Rik	calcium channel, voltage-dependent, gamma subunit 6	protein-coding	chr7:3446621-3447258	1.34102	0.457306	8.69	8.18	8.42	4.16	7.41	9.43	chr7-16903	chr7-18794					chr7-408
Merged-chr3-129839830-5	chr3	129838729	129840628	+	11.986	CONTROL-1_Peaks|CONTROL-2_Peaks|CP27-2_Peaks|Flag-3_Peaks|H2A2_Peaks	intron (NM_007686, intron 1 of 13)	intron (NM_007686, intron 1 of 13)	2939	NM_007686	12630	Mm.117180	NM_007686	ENSMUSG00000058952	Cfi	-	complement component factor i	protein-coding	chr3:129838729-129840628	1.34044	0.314159	26.79	24.16	16.84	21.17	10.9	21	chr3-21321	chr3-14617			chr3-22727		chr3-709	chr3-21337
Merged-chr4-68953767-6	chr4	68952338	68955189	+	43.6133	CONTROL-1_Peaks|CONTROL-2_Peaks|CP27-1_Peaks|CP27-2_Peaks|Flag-3_Peaks|H2A2_Peaks	intron (NM_019967, intron 1 of 7)	intron (NM_019967, intron 1 of 7)	634	NM_019967	56710	Mm.248788	NM_019967	ENSMUSG00000028351	Brinp1	BRINP|Dbc1|Dbccr1|Fam5a	bone morphogenic protein/retinoic acid inducible neural specific 1	protein-coding	chr4:68952338-68955189	1.33451	0.19132	72.41	67.26	49.48	55.18	26.6	66.44	chr4-13560	chr4-21495		chr4-26122	chr4-17596		chr4-1805	chr4-17625
Merged-chr4-119233220-6	chr4	119231895	119234884	+	122.147	CONTROL-1_Peaks|CONTROL-2_Peaks|CP27-1_Peaks|CP27-2_Peaks|Flag-3_Peaks|H2A2_Peaks	promoter-TSS (NM_001042411)	promoter-TSS (NM_001042411)	-440	NM_001042411	56401	Mm.27961	NM_019782	ENSMUSG00000028641	P3h1	2410024C15Rik|Gros1|Lepre1	prolyl 3-hydroxylase 1	protein-coding	chr4:119231895-119234884	1.33096	0.0388768	177.41	167.23	131.94	127	23.11	178.75	chr4-14740	chr4-2505		chr4-2579	chr4-13998		chr4-4189	chr4-7437
Merged-chr1-155052770-4	chr1	155052262	155053661	+	15.74	CONTROL-1_Peaks|CONTROL-2_Peaks|Flag-3_Peaks|H2A2_Peaks	Intergenic	Intergenic	30303	NR_151545	671336	Mm.393476	NR_151545	ENSMUSG00000096950	Gm9530	-	predicted gene 9530	ncRNA	chr1:155052262-155053661	1.33056	0.114967	23.9	24.16	16.84	19.28	13.08	24.86	chr1-15934	chr1-23035					chr1-7348	chr1-19386
Merged-chr17-8306143-2	chr17	8305682	8306604	+	5.72	Flag-3_Peaks|H2A2_Peaks	intron (NR_073374, intron 1 of 4)	intron (NR_073374, intron 1 of 4)	-4945	NM_001357890	106489	Mm.311080	NM_134114	ENSMUSG00000073468	Sft2d1	5630401J11Rik|AA409698	SFT2 domain containing 1	protein-coding	chr17:8305682-8306604	1.32991	0.263795	10.14	9.29	6.67	7.94	9.16	5.57							chr17-1858	chr17-31674
Merged-chr17-11307212-2	chr17	11306783	11307641	+	6.275	CONTROL-1_Peaks|Flag-3_Peaks	intron (NM_016694, intron 4 of 11)	intron (NM_016694, intron 4 of 11)	466853	NM_016694	50873	Mm.311110	NM_016694	ENSMUSG00000023826	Prkn	Park2	parkin RBR E3 ubiquitin protein ligase	protein-coding	chr17:11306783-11307641	1.32801	0.516749	9.41	5.57	5.61	5.67	10.47	3.43	chr17-19923						chr17-3449
Merged-chr15-99029506-6	chr15	99028294	99030846	+	66.2067	CONTROL-1_Peaks|CONTROL-2_Peaks|CP27-1_Peaks|CP27-2_Peaks|Flag-3_Peaks|H2A2_Peaks	promoter-TSS (NM_009448)	promoter-TSS (NM_009448)	-321	NM_009448	22146	Mm.88212	NM_009448	ENSMUSG00000043091	Tuba1c	M[a]6|Tuba6	tubulin, alpha 1C	protein-coding	chr15:99028294-99030846	1.32482	0.190462	101.01	97.74	69.13	80.89	19.62	103.74	chr15-20591	chr15-21511		chr15-6493	chr15-7273		chr15-5700	chr15-13567
Merged-chr15-88953440-3	chr15	88953082	88953795	+	7.22667	CONTROL-1_Peaks|CONTROL-2_Peaks|Flag-3_Peaks	intron (NM_001357736, intron 1 of 11)	B1_Mur3|SINE|Alu	980	NM_001357736	239591	Mm.86807	NM_172818	ENSMUSG00000022388	Ttll8	1700019P01Rik|4933401B17	tubulin tyrosine ligase-like family, member 8	protein-coding	chr15:88953082-88953795	1.32457	0.4675	7.97	9.66	3.86	9.45	7.41	5.57	chr15-28119	chr15-21281					chr15-1590
Merged-chr4-129513664-6	chr4	129512352	129514979	+	67.43	CONTROL-1_Peaks|CONTROL-2_Peaks|CP27-1_Peaks|CP27-2_Peaks|Flag-3_Peaks|H2A2_Peaks	promoter-TSS (NM_010807)	promoter-TSS (NM_010807)	84	NM_010807	17357	Mm.424974	NM_010807	ENSMUSG00000047945	Marcksl1	AL022768|AW215397|AW536807|D4Bc1|F52|MacMARCKS|Macs2|Macs3|Mlp|Mrp	MARCKS-like 1	protein-coding	chr4:129512352-129514979	1.32421	0.000132712	95.22	100.71	71.23	76.73	17.88	99.02	chr4-14822	chr4-20576		chr4-11085	chr4-18560		chr4-4439	chr4-7092
Merged-chr7-64250067-9	chr7	64247931	64252172	+	25.7211	CONTROL-1_Peaks|CONTROL-2_Peaks|CP27-1_Peaks|CP27-2_Peaks|Flag-3_Peaks|H2A2_Peaks	promoter-TSS (NR_105844)	promoter-TSS (NR_105844)	48	NR_105844	102465226		NR_105844	ENSMUSG00000098910	Mir6416	Gm27746|mmu-mir-6416	microRNA 6416	ncRNA	chr7:64247931-64252172	1.32098	0.420316	67.7	86.59	63.51	53.29	27.91	75.02	chr7-24187	chr7-23123		chr7-6438	chr7-14840,chr7-17449,chr7-10293		chr7-523	chr7-12924,chr7-16805
Merged-chr17-24152254-5	chr17	24151451	24153140	+	18.62	CONTROL-1_Peaks|CONTROL-2_Peaks|CP27-2_Peaks|Flag-3_Peaks|H2A2_Peaks	Intergenic	Intergenic	-1373	NM_001286662	18607	Mm.10504	NM_011062	ENSMUSG00000024122	Pdpk1	Pdk1	3-phosphoinositide dependent protein kinase 1	protein-coding	chr17:24151451-24153140	1.32038	0.0735642	27.15	28.24	19.65	22.3	14.83	30.43	chr17-25573	chr17-13937			chr17-7094		chr17-188	chr17-21268
Merged-chr15-78257771-4	chr15	78257137	78258888	+	28.1775	CONTROL-1_Peaks|CONTROL-2_Peaks|CP27-1_Peaks|Flag-3_Peaks	intron (NM_008677, intron 7 of 9)	intron (NM_008677, intron 7 of 9)	13201	NM_008677	17972	Mm.2068	NM_008677	ENSMUSG00000071715	Ncf4	AI451400|p40phox	neutrophil cytosolic factor 4	protein-coding	chr15:78257137-78258888	1.31845	0.09791	45.62	43.85	36.49	31.37	15.26	21.43	chr15-10324	chr15-12252		chr15-9946			chr15-2659
Merged-chr1-180301796-4	chr1	180301080	180302668	+	15.18	CP27-1_Peaks|CP27-2_Peaks|Flag-3_Peaks|H2A2_Peaks	Intergenic	B1F2|SINE|Alu	-28602	NM_001081175	320404	Mm.132535	NM_001081175	ENSMUSG00000038855	Itpkb	1110033J02Rik|E130307H12Rik	inositol 1,4,5-trisphosphate 3-kinase B	protein-coding	chr1:180301080-180302668	1.3139	0.390155	29.33	23.41	18.6	21.54	16.14	41.58				chr1-24196	chr1-10553		chr1-9225	chr1-16691
Merged-chr3-108087343-10	chr3	108084809	108090802	+	69.294	CONTROL-1_Peaks|CONTROL-2_Peaks|CP27-1_Peaks|CP27-2_Peaks|Flag-3_Peaks|H2A2_Peaks	3' UTR (NM_001358018, exon 1 of 1)	3' UTR (NM_001358018, exon 1 of 1)	-1139	NM_001289719	109674	Mm.274335	NM_028779	ENSMUSG00000027889	Ampd2	1200014F01Rik|AI552571|Ampd-2|m4521Dajl	adenosine monophosphate deaminase 2	protein-coding	chr3:108084809-108090802	1.30818	0.0306568	182.84	183.58	141.76	138.34	44.48	165.89	chr3-15092	chr3-9955		chr3-5879,chr3-6707	chr3-12989,chr3-5141,chr3-5551		chr3-130	chr3-10432,chr3-8350
Merged-chr1-166871492-2	chr1	166871040	166871945	+	7.325	CONTROL-1_Peaks|Flag-3_Peaks	Intergenic	Intergenic	128238	NR_037988	100503962	Mm.216842	NR_037988	ENSMUSG00000102548	Gm16701	-	predicted gene, 16701	ncRNA	chr1:166871040-166871945	1.30706	0.206681	9.78	7.8	7.02	6.43	10.03	6	chr1-26430						chr1-7428
Merged-chr7-47081104-6	chr7	47079841	47082072	+	31.4233	CONTROL-1_Peaks|CONTROL-2_Peaks|CP27-1_Peaks|CP27-2_Peaks|Flag-3_Peaks|H2A2_Peaks	intron (NM_001163565, intron 11 of 13)	intron (NM_001163565, intron 11 of 13)	2268	NR_106023	102465639		NR_106023	ENSMUSG00000098960	Mir7056	Gm27696|mmu-mir-7056	microRNA 7056	ncRNA	chr7:47079841-47082072	1.30682	0.256581	45.62	48.68	29.83	42.33	14.39	46.72	chr7-7471	chr7-6342		chr7-4727	chr7-19071		chr7-1248	chr7-15429
Merged-chr10-110899577-3	chr10	110899202	110899942	+	8.21667	CONTROL-1_Peaks|CONTROL-2_Peaks|Flag-3_Peaks	Intergenic	Intergenic	-3065	NR_045979	75630	Mm.392786	NR_045979	ENSMUSG00000101801	1700020G17Rik	4930480D05Rik	RIKEN cDNA 1700020G17 gene	ncRNA	chr10:110899202-110899942	1.30527	0.143133	9.41	9.66	6.67	7.94	8.29	8.14	chr10-16726	chr10-14629					chr10-474
Merged-chr1-84910629-3	chr1	84909928	84911255	+	8.40667	CONTROL-1_Peaks|CONTROL-2_Peaks|Flag-3_Peaks	intron (NM_027921, intron 4 of 4)	intron (NM_027921, intron 4 of 4)	24492	NM_027921	71781	Mm.158754	NM_027921	ENSMUSG00000026220	Slc16a14	1110004H10Rik	solute carrier family 16 (monocarboxylic acid transporters), member 14	protein-coding	chr1:84909928-84911255	1.30312	0.407767	15.93	14.12	9.83	13.23	8.72	20.15	chr1-27892	chr1-26539					chr1-6376
Merged-chr4-54738828-6	chr4	54737512	54739714	+	33.7017	CONTROL-1_Peaks|CONTROL-2_Peaks|CP27-1_Peaks|CP27-2_Peaks|Flag-3_Peaks|H2A2_Peaks	Intergenic	MLT2B1|LTR|ERVL	-209332	NM_172867	242466	Mm.102904	NM_172867	ENSMUSG00000060206	Zfp462	6030417H05|9430078C22Rik|Gt4-2|Zfpip|Znf462	zinc finger protein 462	protein-coding	chr4:54737512-54739714	1.29942	0.00629258	48.51	56.86	36.49	44.6	20.06	55.73	chr4-27478	chr4-11426		chr4-11983	chr4-14397		chr4-1621	chr4-8808
Merged-chr17-73822273-4	chr17	73821707	73822767	+	9.2675	CONTROL-1_Peaks|CONTROL-2_Peaks|CP27-2_Peaks|Flag-3_Peaks	intron (NM_020578, intron 3 of 5)	intron (NM_020578, intron 3 of 5)	17396	NM_020578	57440	Mm.18526	NM_020578	ENSMUSG00000024065	Ehd3	Ehd2	EH-domain containing 3	protein-coding	chr17:73821707-73822767	1.29866	0.553239	15.57	11.52	8.77	12.09	12.21	8.57	chr17-15250	chr17-15640			chr17-21875		chr17-2964
Merged-chr15-8867140-4	chr15	8866511	8868015	+	19.73	CONTROL-2_Peaks|CP27-1_Peaks|Flag-3_Peaks|H2A2_Peaks	Intergenic	Intergenic	-100686	NM_198024	223332	Mm.321371	NM_198024	ENSMUSG00000048424	Ranbp3l	C130037N17Rik	RAN binding protein 3-like	protein-coding	chr15:8866511-8868015	1.29776	0.143807	30.41	39.76	24.21	29.86	14.83	42.44		chr15-7587		chr15-19663			chr15-335	chr15-8985
Merged-chr11-62910972-6	chr11	62908979	62912764	+	63.0017	CONTROL-1_Peaks|CONTROL-2_Peaks|CP27-1_Peaks|CP27-2_Peaks|Flag-3_Peaks|H2A2_Peaks	Intergenic	MTE2a|LTR|ERVL-MaLR	31416	NM_026210	67510	Mm.9806	NM_026210	ENSMUSG00000014177	Tvp23b	1810036I24Rik|Fam18b|Fam18b1	trans-golgi network vesicle protein 23B	protein-coding	chr11:62908979-62912764	1.29754	0.00969714	89.79	87.7	69.13	67.66	26.17	133.31	chr11-20262	chr11-14771		chr11-12658	chr11-16215		chr11-644	chr11-7019
Merged-chr4-119738886-5	chr4	119737946	119739453	+	24.262	CONTROL-1_Peaks|CONTROL-2_Peaks|CP27-1_Peaks|Flag-3_Peaks|H2A2_Peaks	Intergenic	Intergenic	-75979	NM_010657	16656	Mm.302758	NM_010657	ENSMUSG00000028634	Hivep3	2900056N03Rik|A130075N07|AI848000|E030045D18Rik|KBP-1|KBP1|Krc|Rc|Schnurri-3|Shn3|Zas3	human immunodeficiency virus type I enhancer binding protein 3	protein-coding	chr4:119737946-119739453	1.29679	0.059691	38.02	33.07	29.12	25.7	12.65	33.86	chr4-11151	chr4-13220		chr4-6667			chr4-7356	chr4-12937
Merged-chr15-86202707-7	chr15	86200863	86204120	+	33.3929	CONTROL-1_Peaks|CONTROL-2_Peaks|CP27-1_Peaks|CP27-2_Peaks|Flag-3_Peaks|H2A2_Peaks	Intergenic	Intergenic	-11968	NM_145476	223754	Mm.28904	NM_145476	ENSMUSG00000051864	Tbc1d22a	BC023106|D15Ertd781e	TBC1 domain family, member 22a	protein-coding	chr15:86200863-86204120	1.2947	0.105027	83.27	81.39	61.41	65.77	22.68	77.16	chr15-15857	chr15-21254		chr15-5271	chr15-6266,chr15-4444		chr15-873	chr15-18944
Merged-chr15-101575674-2	chr15	101575282	101576067	+	6.64	CONTROL-1_Peaks|Flag-3_Peaks	Intergenic	Intergenic	-1770	NM_133357	109052	Mm.106868	NM_133357	ENSMUSG00000022986	Krt75	4732468K03Rik|AA589387|K6hf|Krt2-6hf|Krtcap1	keratin 75	protein-coding	chr15:101575282-101576067	1.28942	0.791924	7.97	4.46	2.46	7.18	9.59	7.29	chr15-38061						chr15-1707
Merged-chr11-54062743-5	chr11	54061665	54063773	+	25.948	CONTROL-1_Peaks|CONTROL-2_Peaks|CP27-1_Peaks|CP27-2_Peaks|Flag-3_Peaks	intron (NM_019417, intron 2 of 6)	intron (NM_019417, intron 2 of 6)	6298	NM_019417	30794	Mm.21830	NM_019417	ENSMUSG00000020388	Pdlim4	Ril	PDZ and LIM domain 4	protein-coding	chr11:54061665-54063773	1.28909	0.104106	37.29	38.65	30.18	28.73	13.52	39.44	chr11-16947	chr11-13387		chr11-16277	chr11-18418		chr11-1339
Merged-chr5-20676797-4	chr5	20676387	20677462	+	10.5575	CONTROL-1_Peaks|CONTROL-2_Peaks|Flag-3_Peaks|H2A2_Peaks	intron (NM_015823, intron 21 of 21)	intron (NM_015823, intron 21 of 21)	205200	NM_172992	68770	Mm.86410	NM_172992	ENSMUSG00000039987	Phtf2	1110054G21Rik|9530062N20Rik|AI447096|C77923	putative homeodomain transcription factor 2	protein-coding	chr5:20676387-20677462	1.28849	0.367776	11.59	15.61	10.53	10.58	10.03	18.86	chr5-12052	chr5-11631					chr5-952	chr5-14787
Merged-chr1-10261396-6	chr1	10260750	10261919	+	13.9617	CONTROL-1_Peaks|CONTROL-2_Peaks|CP27-1_Peaks|CP27-2_Peaks|Flag-3_Peaks|H2A2_Peaks	Intergenic	Intergenic	-28664	NM_001102430	211673	Mm.229141	NM_001102430	ENSMUSG00000067851	Arfgef1	ARFGEP1|BIG1|D130059B05Rik|D730028O18Rik|P200	ADP-ribosylation factor guanine nucleotide-exchange factor 1(brefeldin A-inhibited)	protein-coding	chr1:10260750-10261919	1.28694	0.228401	22.81	25.27	15.44	21.92	9.16	13.29	chr1-33022	chr1-21773		chr1-10547	chr1-10116		chr1-7688	chr1-31590
Merged-chr4-58650898-2	chr4	58650359	58651447	+	8.925	CONTROL-1_Peaks|Flag-3_Peaks	Intergenic	B4A|SINE|B4	-97412	NM_010336	14745	Mm.4772	NM_010336	ENSMUSG00000038668	Lpar1	AI326300|Edg2|Gpcr26|Kdt2|lpA1|vzg-1	lysophosphatidic acid receptor 1	protein-coding	chr4:58650359-58651447	1.2865	0.358894	13.03	10.41	8.77	9.45	11.77	7.29	chr4-22336						chr4-4784
Merged-chr15-54858058-2	chr15	54857682	54858498	+	7.04	CONTROL-1_Peaks|Flag-3_Peaks	intron (NM_001285994, intron 19 of 25)	intron (NM_001285994, intron 19 of 25)	62056	NM_015744	18606	Mm.250256	NM_015744	ENSMUSG00000022425	Enpp2	ATX|E-NPP 2|Npps2|PD-Ialpha|Pdnp2|lysoPLD	ectonucleotide pyrophosphatase/phosphodiesterase 2	protein-coding	chr15:54857682-54858498	1.28471	0.460055	10.14	8.18	6.32	7.94	7.41	10.72	chr15-30776						chr15-4201
Merged-chr1-114165720-6	chr1	114164921	114166852	+	20.5333	CONTROL-1_Peaks|CONTROL-2_Peaks|CP27-1_Peaks|CP27-2_Peaks|Flag-3_Peaks|H2A2_Peaks	Intergenic	Intergenic	-1518851	NM_001077425	636808	Mm.101576	NM_001077425	ENSMUSG00000070695	Cntnap5a	Caspr5-1|EG636808	contactin associated protein-like 5A	protein-coding	chr1:114164921-114166852	1.28467	0.116221	35.84	34.56	29.48	25.32	16.14	21.43	chr1-14873	chr1-8757		chr1-13352	chr1-10384		chr1-7105	chr1-22099
Merged-chr19-5845532-5	chr19	5843497	5846202	+	16.976	CONTROL-1_Peaks|CONTROL-2_Peaks|CP27-1_Peaks|CP27-2_Peaks|Flag-3_Peaks	non-coding (NR_003513, exon 1 of 1)	non-coding (NR_003513, exon 1 of 1)	629	NR_131212	66961	Mm.281895	NR_003513	ENSMUSG00000092274	Neat1	2310043N10Rik|VINC	nuclear paraspeckle assembly transcript 1 (non-protein coding)	ncRNA	chr19:5843497-5846202	1.2845	0.518409	19.19	12.64	11.93	12.85	52.33	12.86	chr19-5162	chr19-6510		chr19-9054	chr19-5932		chr19-6
Merged-chr5-110456364-2	chr5	110455939	110456789	+	6.835	CONTROL-2_Peaks|Flag-3_Peaks	Intergenic	Intergenic	-7861	NM_001142642	381668	Mm.348782	NM_028596	ENSMUSG00000043323	Fbrsl1	2410025L10Rik|AI467568|Gm1049|Gm29766|mKIAA1545	fibrosin-like 1	protein-coding	chr5:110455939-110456789	1.28401	0.535008	5.79	8.18	5.97	4.91	8.72	2.14		chr5-22660					chr5-731
Merged-chr2-84860484-6	chr2	84859565	84861263	+	12.6783	CONTROL-1_Peaks|CONTROL-2_Peaks|CP27-1_Peaks|CP27-2_Peaks|Flag-3_Peaks|H2A2_Peaks	intron (NM_001083809, intron 12 of 13)	intron (NM_001083809, intron 12 of 13)	19788	NM_001083809	72401	Mm.22716	NM_024497	ENSMUSG00000027075	Slc43a1	2610016F07Rik|AA986141|Lat3|PB39|Pov1|R00504	solute carrier family 43, member 1	protein-coding	chr2:84859565-84861263	1.28108	0.242163	36.21	30.47	25.97	26.08	13.95	21.86	chr2-14079	chr2-14859		chr2-11880	chr2-18433		chr2-7342	chr2-22835
Merged-chr6-30393969-2	chr6	30393610	30394329	+	7.14	CP27-2_Peaks|Flag-3_Peaks	Intergenic	Intergenic	-2949	NM_001311086	232679	Mm.29780	NM_172735	ENSMUSG00000039130	Zc3hc1	1110054L24Rik|AU018540|AU019789|HSPC216|Nipa	zinc finger, C3HC type 1	protein-coding	chr6:30393610-30394329	1.28097	0.727931	13.4	7.8	5.97	10.58	8.29	8.57					chr6-19560		chr6-71
Merged-chr4-130183820-4	chr4	130183068	130184461	+	10.7825	CONTROL-1_Peaks|CONTROL-2_Peaks|Flag-3_Peaks|H2A2_Peaks	Intergenic	Intergenic	-8642	NM_023476	94242	Mm.15801	NM_023476	ENSMUSG00000028776	Tinagl1	1110021J17Rik|AZ-1|AZ1|Arg1|Lcn7|TARP|Tinagl	tubulointerstitial nephritis antigen-like 1	protein-coding	chr4:130183068-130184461	1.2806	0.120448	22.09	20.81	16.49	17.01	16.14	16.29	chr4-11201	chr4-14109					chr4-918	chr4-25959
Merged-chr1-152949631-2	chr1	152949288	152949974	+	8.085	Flag-3_Peaks|H2A2_Peaks	Intergenic	Intergenic	-5470	NM_175460	226518	Mm.40548	NM_175460	ENSMUSG00000042751	Nmnat2	AI843915|D030041I09Rik|PNAT1|PNAT2	nicotinamide nucleotide adenylyltransferase 2	protein-coding	chr1:152949288-152949974	1.27356	0.32751	7.6	6.32	5.26	5.67	11.34	6.86							chr1-7334	chr1-45931
Merged-chr10-17722381-6	chr10	17720316	17724350	+	82.7317	CONTROL-1_Peaks|CONTROL-2_Peaks|CP27-1_Peaks|CP27-2_Peaks|Flag-3_Peaks|H2A2_Peaks	promoter-TSS (NM_010828)	promoter-TSS (NM_010828)	-895	NM_010828	17684	Mm.272321	NM_010828	ENSMUSG00000039910	Cited2	AI835299|ER154-like|Mrg1|Msg2|p35srj	Cbp/p300-interacting transactivator, with Glu/Asp-rich carboxy-terminal domain, 2	protein-coding	chr10:17720316-17724350	1.26877	0.205727	117.67	104.06	86.32	88.44	27.04	142.31	chr10-11206	chr10-13891		chr10-11549	chr10-17742		chr10-321	chr10-8662
Merged-chr3-85360236-2	chr3	85359824	85360648	+	7.185	CONTROL-1_Peaks|Flag-3_Peaks	Intergenic	Intergenic	42717	NR_040542	73283	Mm.489084	NR_040542	ENSMUSG00000099995	1700036G14Rik	-	RIKEN cDNA 1700036G14 gene	ncRNA	chr3:85359824-85360648	1.26735	0.592656	8.33	4.09	5.26	4.54	9.16	3.86	chr3-25750						chr3-535
Merged-chr17-35591121-6	chr17	35589951	35592674	+	31.8183	CONTROL-1_Peaks|CONTROL-2_Peaks|CP27-1_Peaks|CP27-2_Peaks|Flag-3_Peaks|H2A2_Peaks	Intergenic	Intergenic	23827	NM_175148	69542	Mm.265291	NM_175148	ENSMUSG00000039269	2300002M23Rik	Stg|emprin	RIKEN cDNA 2300002M23 gene	protein-coding	chr17:35589951-35592674	1.26655	0.121028	56.84	58.72	47.02	44.22	16.57	67.3	chr17-9604	chr17-9164		chr17-8119	chr17-10106		chr17-4264	chr17-15422
Merged-chr11-60931969-6	chr11	60930849	60932971	+	19.885	CONTROL-1_Peaks|CONTROL-2_Peaks|CP27-1_Peaks|CP27-2_Peaks|Flag-3_Peaks|H2A2_Peaks	promoter-TSS (NR_157293)	promoter-TSS (NR_157293)	-43	NR_027800	24082	Mm.46270	NM_025293	ENSMUSG00000042549	Map2k3os	F3-1|Gm16516|Gtlf3a	mitogen-activated protein kinase kinase 3, opposite strand	ncRNA	chr11:60930849-60932971	1.26374	0.170609	35.12	39.39	29.48	29.48	10.47	47.15	chr11-8376	chr11-7685		chr11-7927	chr11-13666		chr11-1402	chr11-17544
Merged-chr17-79099981-6	chr17	79098918	79100844	+	51.08	CONTROL-1_Peaks|CONTROL-2_Peaks|CP27-1_Peaks|CP27-2_Peaks|Flag-3_Peaks|H2A2_Peaks	Intergenic	Intergenic	47975	NM_001316729	70536	Mm.293870	NM_027455	ENSMUSG00000024084	Qpct	5730422A13Rik	glutaminyl-peptide cyclotransferase (glutaminyl cyclase)	protein-coding	chr17:79098918-79100844	1.25924	0.180852	75.67	60.58	57.55	50.65	14.83	78.02	chr17-19508	chr17-20444		chr17-13050	chr17-5503		chr17-3025	chr17-19502
Merged-chr10-109362306-2	chr10	109361858	109362687	+	7.1	Flag-3_Peaks|H2A2_Peaks	Intergenic	Intergenic	-351297	NM_001252341	20979	Mm.289702	NM_009306	ENSMUSG00000035864	Syt1	AW124717|G630098F17Rik|SytI	synaptotagmin I	protein-coding	chr10:109361858-109362687	1.25749	0.245071	7.24	4.09	5.61	3.4	9.16	6.86							chr10-287	chr10-29172
Merged-chr10-93838819-2	chr10	93838392	93839246	+	5.86	CP27-1_Peaks|Flag-3_Peaks	intron (NM_001206851, intron 1 of 6)	PB1D7|SINE|Alu	7264	NM_001206851	327799	Mm.491598	NM_183199	ENSMUSG00000020020	Usp44	E430004F17Rik	ubiquitin specific peptidase 44	protein-coding	chr10:93838392-93839246	1.25669	0.0967121	7.97	7.06	6.67	5.29	7.41	4.72				chr10-21806			chr10-1446
Merged-chr15-97990262-6	chr15	97989513	97991245	+	12.8967	CONTROL-1_Peaks|CONTROL-2_Peaks|CP27-1_Peaks|CP27-2_Peaks|Flag-3_Peaks|H2A2_Peaks	intron (NM_001113515, intron 17 of 52)	intron (NM_001113515, intron 17 of 52)	14345	NM_031163	12824	Mm.2423	NM_031163	ENSMUSG00000022483	Col2a1	Col2|Col2a|Col2a-1|Del1|Dmm|Lpk|M100413|Rgsc413|Rgsc856	collagen, type II, alpha 1	protein-coding	chr15:97989513-97991245	1.25461	0.0346686	26.79	25.64	21.76	20.03	14.83	26.58	chr15-18790	chr15-14193		chr15-21869	chr15-10139		chr15-3019	chr15-13554
Merged-chr15-7760176-4	chr15	7758786	7761223	+	16.8425	CONTROL-1_Peaks|CONTROL-2_Peaks|CP27-1_Peaks|Flag-3_Peaks	Intergenic	RMER19B|LTR|ERVK	-50044	NM_010275	14573	Mm.4679	NM_010275	ENSMUSG00000022144	Gdnf	AI385739|ATF	glial cell line derived neurotrophic factor	protein-coding	chr15:7758786-7761223	1.25422	0.172911	29.69	35.68	24.91	27.21	21.37	16.72	chr15-29059	chr15-13415		chr15-22328			chr15-60
Merged-chr15-77945970-6	chr15	77945103	77946840	+	35.595	CONTROL-1_Peaks|CONTROL-2_Peaks|CP27-1_Peaks|CP27-2_Peaks|Flag-3_Peaks|H2A2_Peaks	intron (NM_001017983, intron 7 of 8)	intron (NM_001017983, intron 7 of 8)	10751	NM_001168260	239554	Mm.295605	NM_001017983	ENSMUSG00000016552	Foxred2	A430097D04Rik|D15Bwg0759e|Gm304	FAD-dependent oxidoreductase domain containing 2	protein-coding	chr15:77945103-77946840	1.25385	0.3694	50.33	54.63	46.67	37.04	11.77	50.58	chr15-6528	chr15-9322		chr15-8449	chr15-4737		chr15-4912	chr15-11476
Merged-chr15-84675616-2	chr15	84675221	84676011	+	6.85	Flag-3_Peaks|H2A2_Peaks	intron (NM_001346662, intron 1 of 8)	intron (NM_001346662, intron 1 of 8)	-5382	NM_146061	109270	Mm.291372	NM_146061	ENSMUSG00000036106	Prr5	AU043908|Arhgap8|C030017C09Rik|C78947|Protor-1|Protor1	proline rich 5 (renal)	protein-coding	chr15:84675221-84676011	1.24717	0.364554	8.69	8.92	8.07	6.05	8.29	8.57							chr15-1536	chr15-26431
Merged-chr6-42471337-6	chr6	42470515	42472072	+	19.975	CONTROL-1_Peaks|CONTROL-2_Peaks|CP27-1_Peaks|CP27-2_Peaks|Flag-3_Peaks|H2A2_Peaks	TTS (NM_146987)	TTS (NM_146987)	883	NM_146987	258989	Mm.377778	NM_146987	ENSMUSG00000091983	Olfr457	MOR257-1	olfactory receptor 457	protein-coding	chr6:42470515-42472072	1.24682	0.315668	30.77	26.01	22.11	23.43	10.9	27.86	chr6-8671	chr6-10108		chr6-11431	chr6-8084		chr6-1048	chr6-9587
Merged-chr15-62892698-6	chr15	62892118	62893607	+	13.1867	CONTROL-1_Peaks|CONTROL-2_Peaks|CP27-1_Peaks|CP27-2_Peaks|Flag-3_Peaks|H2A2_Peaks	Intergenic	L1_Rod|LINE|L1	586746	NR_045279	432958	Mm.255105	NR_045279	ENSMUSG00000115520	Gm20740	-	predicted gene, 20740	ncRNA	chr15:62892118-62893607	1.24661	0.501227	29.33	23.04	18.95	23.06	12.65	31.72	chr15-9283	chr15-25878		chr15-10469	chr15-9319		chr15-2367	chr15-13347
Merged-chr17-34543932-6	chr17	34542948	34545029	+	27.3383	CONTROL-1_Peaks|CONTROL-2_Peaks|CP27-1_Peaks|CP27-2_Peaks|Flag-3_Peaks|H2A2_Peaks	Intergenic	IAP1-MM_I-int|LTR|ERVK	-20307	NM_010929	18132	Mm.173813	NM_010929	ENSMUSG00000015468	Notch4	Int-3|Int3|N4	notch 4	protein-coding	chr17:34542948-34545029	1.24405	0.120082	42.72	44.6	35.79	34.4	9.16	45.01	chr17-13023	chr17-10549		chr17-12599	chr17-8553		chr17-4190	chr17-10714
Merged-chr4-62431612-3	chr4	62430910	62432231	+	19.5133	CONTROL-1_Peaks|CONTROL-2_Peaks|Flag-3_Peaks	intron (NM_153504, intron 2 of 3)	intron (NM_153504, intron 2 of 3)	3680	NM_153504	76072	Mm.169565	NM_153504	ENSMUSG00000063851	Rnf183	5830442J12Rik	ring finger protein 183	protein-coding	chr4:62430910-62432231	1.24358	0.183014	29.69	24.53	22.81	20.79	11.34	20.15	chr4-12113	chr4-17828					chr4-4876
Merged-chr2-32680056-4	chr2	32678871	32681008	+	23.15	CONTROL-1_Peaks|CONTROL-2_Peaks|Flag-3_Peaks|H2A2_Peaks	intron (NM_001146350, intron 12 of 13)	intron (NM_001146350, intron 12 of 13)	7827	NR_106168	102465885		NR_106168	ENSMUSG00000098972	Mir8093	Gm27548|mmu-mir-8093	microRNA 8093	ncRNA	chr2:32678871-32681008	1.24066	0.171812	28.24	34.19	23.86	26.46	18.75	36.44	chr2-30097	chr2-22164					chr2-3806	chr2-19998
Merged-chr15-42396779-3	chr15	42396457	42397169	+	7.07667	CP27-1_Peaks|Flag-3_Peaks|H2A2_Peaks	Intergenic	RLTR33|LTR|ERVK	280164	NM_001286062	11600	Mm.309336	NM_009640	ENSMUSG00000022309	Angpt1	1110046O21Rik|Ang-1|Ang1	angiopoietin 1	protein-coding	chr15:42396457-42397169	1.23761	0.517803	7.6	14.12	7.72	9.83	8.29	14.57				chr15-20338			chr15-3999	chr15-15765
Merged-chr4-116022353-2	chr4	116021947	116022686	+	8.14	CONTROL-2_Peaks|Flag-3_Peaks	Intergenic	Intergenic	-4392	NR_151700	14073	Mm.256025	NM_010173	ENSMUSG00000034171	Faah	AW412498	fatty acid amide hydrolase	protein-coding	chr4:116021947-116022686	1.23661	0.533013	6.52	7.8	6.67	4.91	9.59	6.43		chr4-28295					chr4-866
Merged-chr16-31355596-2	chr16	31355223	31356108	+	8.98	CONTROL-2_Peaks|Flag-3_Peaks	Intergenic	(GA)n|Simple_repeat|Simple_repeat	30375	NR_155301	102636590	Mm.45825	NR_155301		AV205837	-	expressed sequence AV205837	ncRNA	chr16:31355223-31356108	1.23657	0.334436	7.24	8.18	4.91	7.56	11.77	9.86		chr16-11044					chr16-163
Merged-chr4-66109021-2	chr4	66108582	66109460	+	6.01	Flag-3_Peaks|H2A2_Peaks	intron (NM_019514, intron 3 of 21)	intron (NM_019514, intron 3 of 21)	295462	NM_019514	56079	Mm.445312	NM_019514	ENSMUSG00000028373	Astn2	1d8|Astnl|bM452J22.1	astrotactin 2	protein-coding	chr4:66108582-66109460	1.23623	0.141235	7.6	6.32	5.97	5.29	9.59	8.57							chr4-5085	chr4-34440
Merged-chr4-95094453-7	chr4	95093103	95095563	+	12.9186	CONTROL-1_Peaks|CONTROL-2_Peaks|CP27-1_Peaks|CP27-2_Peaks|Flag-3_Peaks	Intergenic	(CA)n|Simple_repeat|Simple_repeat	-42111	NM_010591	16476	Mm.275071	NM_010591	ENSMUSG00000052684	Jun	AP-1|Junc|c-jun	jun proto-oncogene	protein-coding	chr4:95093103-95095563	1.23566	0.195114	35.12	35.3	30.53	26.46	19.62	43.72	chr4-17808	chr4-31481		chr4-16812,chr4-27438	chr4-16357,chr4-14919		chr4-6584
Merged-chr17-78417773-6	chr17	78416621	78419155	+	72.5683	CONTROL-1_Peaks|CONTROL-2_Peaks|CP27-1_Peaks|CP27-2_Peaks|Flag-3_Peaks|H2A2_Peaks	exon (NM_001285940, exon 1 of 9)	exon (NM_001285940, exon 1 of 9)	264	NM_199448	225020	Mm.236835	NM_199448	ENSMUSG00000056121	Fez2	9030616F16|D17Ertd315e	fasciculation and elongation protein zeta 2 (zygin II)	protein-coding	chr17:78416621-78419155	1.23495	0.0230594	107.53	96.99	87.37	78.24	14.83	108.88	chr17-9367	chr17-14568		chr17-4699	chr17-5194		chr17-5401	chr17-10546
Merged-chr1-88389788-5	chr1	88389506	88390148	+	6.65	CONTROL-1_Peaks|CONTROL-2_Peaks|CP27-1_Peaks|CP27-2_Peaks|Flag-3_Peaks	TTS (NM_134252)	TTS (NM_134252)	-17183	NM_029269	75396	Mm.173058	NM_029269	ENSMUSG00000026295	Spp2	0610038O04Rik|pp-24|spp24	secreted phosphoprotein 2	protein-coding	chr1:88389506-88390148	1.23412	0.0909169	8.33	7.8	7.02	6.05	7.85	9	chr1-25587	chr1-29508		chr1-25617	chr1-28180		chr1-7063
Merged-chr5-29986401-2	chr5	29986150	29986653	+	5.25	Flag-3_Peaks|H2A2_Peaks	Intergenic	Lx3A|LINE|L1	-26713	NM_001314054	16193	Mm.1019	NM_031168	ENSMUSG00000025746	Il6	Il-6	interleukin 6	protein-coding	chr5:29986150-29986653	1.23277	0.760884	2.9	3.72	3.86	1.51	5.23	5.14							chr5-1613	chr5-28831
Merged-chr4-41057229-4	chr4	41056702	41057664	+	7.2275	CONTROL-1_Peaks|CP27-1_Peaks|CP27-2_Peaks|Flag-3_Peaks	Intergenic	Intergenic	-9047	NM_007473	11832	Mm.8728	NM_007473	ENSMUSG00000028427	Aqp7	AQP7L|AQPap	aquaporin 7	protein-coding	chr4:41056702-41057664	1.23082	0.624587	10.86	8.55	6.32	9.45	7.85	7.72	chr4-17240			chr4-25013	chr4-15592		chr4-2676
Merged-chr4-62274969-6	chr4	62274250	62275657	+	30.4733	CONTROL-1_Peaks|CONTROL-2_Peaks|CP27-1_Peaks|CP27-2_Peaks|Flag-3_Peaks|H2A2_Peaks	Intergenic	B1_Mus2|SINE|Alu	-11476	NM_025286	20530	Mm.292539	NM_025286	ENSMUSG00000066152	Slc31a2	AI604396|CTR2	solute carrier family 31, member 2	protein-coding	chr4:62274250-62275657	1.22863	0.433321	39.83	49.43	38.25	34.4	12.65	41.15	chr4-5728	chr4-13617		chr4-6075	chr4-9389		chr4-4870	chr4-9339
Merged-chr17-81314278-2	chr17	81313922	81314635	+	7.615	CONTROL-1_Peaks|Flag-3_Peaks	Intergenic	MMAR1|DNA|TcMar-Mariner	-249193	NM_028138	72167	Mm.273257	NM_028138	ENSMUSG00000024246	Thumpd2	2810025A12Rik	THUMP domain containing 2	protein-coding	chr17:81313922-81314635	1.2283	0.717396	10.14	5.57	5.61	7.18	8.72	4.72	chr17-13451						chr17-3055
Merged-chr1-173913605-6	chr1	173912099	173914914	+	64.1183	CONTROL-1_Peaks|CONTROL-2_Peaks|CP27-1_Peaks|CP27-2_Peaks|Flag-3_Peaks|H2A2_Peaks	promoter-TSS (NM_001301745)	promoter-TSS (NM_001301745)	-460	NM_001033450	381308	Mm.490248	NM_001033450	ENSMUSG00000026536	Ifi211	A730048F03|Ifi205b|Mnda|ifi-205-B	interferon activated gene 211	protein-coding	chr1:173912099-173914914	1.22545	0.189983	102.82	101.45	78.25	88.44	21.8	115.31	chr1-3918	chr1-4969		chr1-5216	chr1-4016		chr1-7497	chr1-5614
Merged-chr5-149264745-6	chr5	149263972	149265527	+	12.4633	CONTROL-1_Peaks|CONTROL-2_Peaks|CP27-1_Peaks|CP27-2_Peaks|Flag-3_Peaks|H2A2_Peaks	promoter-TSS (NM_009663)	promoter-TSS (NM_009663)	-255	NM_001308462	11690	Mm.19844	NM_009663	ENSMUSG00000060063	Alox5ap	Flap	arachidonate 5-lipoxygenase activating protein	protein-coding	chr5:149263972-149265527	1.22513	0.22161	17.74	21.55	15.44	16.63	12.21	21	chr5-11402	chr5-9931		chr5-16079	chr5-12562		chr5-1462	chr5-12704
Merged-chr5-122644232-5	chr5	122643041	122645110	+	28.042	CONTROL-1_Peaks|CONTROL-2_Peaks|CP27-1_Peaks|CP27-2_Peaks|Flag-3_Peaks	exon (NM_011027, exon 1 of 13)	exon (NM_011027, exon 1 of 13)	148	NM_001038887	18439	Mm.42026	NM_011027	ENSMUSG00000029468	P2rx7	AI467586|P2X(7)|P2X7R	purinergic receptor P2X, ligand-gated ion channel, 7	protein-coding	chr5:122643041-122645110	1.22353	0.138024	42.36	38.65	33.33	32.88	15.7	39.01	chr5-21947	chr5-10814		chr5-15856	chr5-11663		chr5-1286
Merged-chr4-95203054-4	chr4	95202331	95203808	+	18.585	CP27-1_Peaks|CP27-2_Peaks|Flag-3_Peaks|H2A2_Peaks	Intergenic	Intergenic	-150847	NM_010591	16476	Mm.275071	NM_010591	ENSMUSG00000052684	Jun	AP-1|Junc|c-jun	jun proto-oncogene	protein-coding	chr4:95202331-95203808	1.22213	0.19193	34.76	39.02	25.97	34.4	12.21	32.15				chr4-18516	chr4-23182		chr4-6590	chr4-10880
Merged-chr4-126259196-13	chr4	126255341	126263244	+	61.8877	CONTROL-1_Peaks|CONTROL-2_Peaks|CP27-1_Peaks|CP27-2_Peaks|Flag-3_Peaks|H2A2_Peaks	Intergenic	Intergenic	-2973	NM_001145970	245877	Mm.266716	NM_144941	ENSMUSG00000028849	Map7d1	AV028413|BC019977|Mtap7d1|Parcc1|Rprc1|mKIAA1187	MAP7 domain containing 1	protein-coding	chr4:126255341-126263244	1.21958	0.0554568	185.01	187.67	154.39	151.19	46.66	228.48	chr4-19717,chr4-7476	chr4-14990,chr4-7734,chr4-14992		chr4-10453,chr4-15665,chr4-17188	chr4-7255,chr4-10163,chr4-18514		chr4-4367	chr4-10025
Merged-chr15-38422123-2	chr15	38421712	38422535	+	7.39	CONTROL-2_Peaks|Flag-3_Peaks	Intergenic	Intergenic	68424	NR_105916	102465574		NR_105916	ENSMUSG00000099110	Mir6951	Gm27765|mmu-mir-6951	microRNA 6951	ncRNA	chr15:38421712-38422535	1.21761	0.527576	6.88	10.41	7.02	7.18	8.29	17.15		chr15-22309					chr15-1156
Merged-chr16-32658928-4	chr16	32658216	32659561	+	11.25	CONTROL-1_Peaks|CP27-1_Peaks|CP27-2_Peaks|Flag-3_Peaks	intron (NM_001110147, intron 1 of 13)	GC_rich|Low_complexity|Low_complexity	9309	NR_033493	675921	Mm.404316	NR_033493	ENSMUSG00000075265	Tnk2os	Gm10818	tyrosine kinase, non-receptor 2, opposite strand	ncRNA	chr16:32658216-32659561	1.21459	0.294774	20.64	15.98	15.79	14.36	10.03	21.43	chr16-5210			chr16-7142	chr16-5287		chr16-429
Merged-chr1-125435497-6	chr1	125434352	125436689	+	32.3817	CONTROL-1_Peaks|CONTROL-2_Peaks|CP27-1_Peaks|CP27-2_Peaks|Flag-3_Peaks|H2A2_Peaks	5' UTR (NM_023735, exon 1 of 12)	5' UTR (NM_023735, exon 1 of 12)	207	NM_001205386	74117	Mm.183102	NM_023735	ENSMUSG00000026341	Actr3	1200003A09Rik|Arp3	ARP3 actin-related protein 3	protein-coding	chr1:125434352-125436689	1.21369	0.178065	47.79	48.31	41.76	37.42	17.44	57.87	chr1-15791	chr1-10949		chr1-14973	chr1-8589		chr1-5910	chr1-18641
Merged-chr15-76715688-6	chr15	76714962	76716499	+	32.725	CONTROL-1_Peaks|CONTROL-2_Peaks|CP27-1_Peaks|CP27-2_Peaks|Flag-3_Peaks|H2A2_Peaks	TTS (NM_145471)	TTS (NM_145471)	5089	NM_001358893	223664	Mm.277582	NM_145471	ENSMUSG00000033728	Lrrc14	E130306I01Rik|mKIAA0014	leucine rich repeat containing 14	protein-coding	chr15:76714962-76716499	1.21017	0.445766	42.36	53.51	41.05	38.17	14.39	33.01	chr15-13717	chr15-34530		chr15-10551	chr15-7532		chr15-2621	chr15-16039
Merged-chr11-106714112-6	chr11	106713122	106715580	+	16.5033	CONTROL-1_Peaks|CONTROL-2_Peaks|CP27-1_Peaks|CP27-2_Peaks|Flag-3_Peaks|H2A2_Peaks	intron (NM_001032378, intron 2 of 13)	intron (NM_001032378, intron 2 of 13)	930	NM_001305158	18613	Mm.343951	NM_008816	ENSMUSG00000020717	Pecam1	C85791|Cd31|PECAM-1|Pecam	platelet/endothelial cell adhesion molecule 1	protein-coding	chr11:106713122-106715580	1.20974	0.570093	34.39	46.82	36.14	30.99	16.14	31.72	chr11-10705	chr11-11552		chr11-10449	chr11-12702		chr11-1128	chr11-18455
Merged-chr3-122408632-6	chr3	122407837	122409603	+	14.685	CONTROL-1_Peaks|CONTROL-2_Peaks|CP27-1_Peaks|CP27-2_Peaks|Flag-3_Peaks|H2A2_Peaks	Intergenic	Intergenic	-11037	NM_013867	29815	Mm.45815	NM_013867	ENSMUSG00000028121	Bcar3	AI131758|AND-34	breast cancer anti-estrogen resistance 3	protein-coding	chr3:122407837-122409603	1.20861	0.138432	29.69	25.64	23.86	21.92	10.9	31.29	chr3-5278	chr3-20370		chr3-8193	chr3-19657		chr3-1360	chr3-16937
Merged-chr11-103115540-6	chr11	103114522	103116833	+	38.025	CONTROL-1_Peaks|CONTROL-2_Peaks|CP27-1_Peaks|CP27-2_Peaks|Flag-3_Peaks|H2A2_Peaks	promoter-TSS (NM_138753)	promoter-TSS (NM_138753)	-648	NM_138753	192231	Mm.8763	NM_138753	ENSMUSG00000048878	Hexim1	7330426E13Rik|CLP-1|Clp1|HIS1	hexamethylene bis-acetamide inducible 1	protein-coding	chr11:103114522-103116833	1.20724	0.517366	63	55.37	42.11	55.94	16.57	61.73	chr11-15014	chr11-12546		chr11-11830	chr11-8363		chr11-607	chr11-21217
Merged-chr6-87745660-7	chr6	87744110	87747715	+	19.52	CONTROL-1_Peaks|CONTROL-2_Peaks|CP27-1_Peaks|CP27-2_Peaks|Flag-3_Peaks|H2A2_Peaks	intron (NM_001159697, intron 2 of 7)	B1_Mus1|SINE|Alu	15043	NM_001159697	58229	Mm.333229	NM_021418	ENSMUSG00000068263	Efcc1	Ccdc48	EF hand and coiled-coil domain containing 1	protein-coding	chr6:87744110-87747715	1.20379	0.439927	51.77	56.86	50.18	40.06	28.78	45.01	chr6-14832	chr6-14070		chr6-9133	chr6-17775,chr6-20429		chr6-2330	chr6-19858
Merged-chr11-112807636-4	chr11	112806792	112808396	+	12.78	CP27-1_Peaks|CP27-2_Peaks|Flag-3_Peaks|H2A2_Peaks	Intergenic	Intergenic	-8586	NR_126071	100038732	Mm.65345	NR_126070	ENSMUSG00000075437	Gm11681	-	predicted gene 11681	ncRNA	chr11:112806792-112808396	1.20357	0.473321	22.09	26.39	21.76	18.52	13.52	18.43				chr11-10095	chr11-14895		chr11-851	chr11-13223
Merged-chr1-174561434-2	chr1	174561065	174561803	+	5.59	Flag-3_Peaks|H2A2_Peaks	intron (NM_019445, intron 2 of 17)	B1_Mm|SINE|Alu	59609	NM_019445	54418	Mm.330620	NM_019445	ENSMUSG00000028354	Fmn2	AU024104	formin 2	protein-coding	chr1:174561065-174561803	1.20237	0.336696	5.43	3.72	4.21	3.4	7.41	5.14							chr1-9155	chr1-42957
Merged-chr8-82220060-2	chr8	82219580	82220540	+	5.905	Flag-3_Peaks|H2A2_Peaks	Intergenic	Intergenic	182526	NM_008357	16168	Mm.4392	NM_008357	ENSMUSG00000031712	Il15	AI503618|IL-15	interleukin 15	protein-coding	chr8:82219580-82220540	1.20081	0.245199	2.9	5.95	2.46	4.91	7.85	8.14							chr8-286	chr8-14551
Merged-chr7-25282437-6	chr7	25281406	25283388	+	20.98	CONTROL-1_Peaks|CONTROL-2_Peaks|CP27-1_Peaks|CP27-2_Peaks|Flag-3_Peaks|H2A2_Peaks	5' UTR (NM_027882, exon 1 of 20)	5' UTR (NM_027882, exon 1 of 20)	218	NM_027882	71722	Mm.28833	NM_027882	ENSMUSG00000005442	Cic	1200010B10Rik|mKIAA0306	capicua transcriptional repressor	protein-coding	chr7:25281406-25283388	1.19985	0.333627	27.88	36.42	25.62	27.97	10.47	30.86	chr7-10985	chr7-15339		chr7-14817	chr7-12714		chr7-341	chr7-14749
Merged-chr15-103366675-6	chr15	103365611	103368712	+	52.1567	CONTROL-1_Peaks|CONTROL-2_Peaks|CP27-1_Peaks|CP27-2_Peaks|Flag-3_Peaks|H2A2_Peaks	promoter-TSS (NM_010577)	promoter-TSS (NM_010577)	-370	NM_001314041	16402	Mm.16234	NM_010577	ENSMUSG00000000555	Itga5	Cd49e|Fnra|VLA5	integrin alpha 5 (fibronectin receptor alpha)	protein-coding	chr15:103365611-103368712	1.19966	0.0685092	84.72	84.36	69.13	71.81	23.11	117.02	chr15-16084	chr15-8615		chr15-30342	chr15-13721		chr15-5868	chr15-10836
Merged-chr2-155737359-7	chr2	155736189	155738464	+	22.8114	CONTROL-1_Peaks|CONTROL-2_Peaks|CP27-1_Peaks|CP27-2_Peaks|Flag-3_Peaks|H2A2_Peaks	Intergenic	B3|SINE|B2	-7851	NM_145537	108687	Mm.273706	NM_145537	ENSMUSG00000038312	Edem2	9530090G24Rik|AI327354	ER degradation enhancer, mannosidase alpha-like 2	protein-coding	chr2:155736189-155738464	1.19908	0.241733	49.24	42.37	38.6	37.8	13.08	45.01	chr2-24578	chr2-16797		chr2-12104,chr2-18003	chr2-14417		chr2-6281	chr2-13922
Merged-chr17-31873940-4	chr17	31873019	31875255	+	16.135	CONTROL-2_Peaks|CP27-1_Peaks|Flag-3_Peaks|H2A2_Peaks	Intergenic	Intergenic	-18333	NM_010831	17691	Mm.290941	NM_010831	ENSMUSG00000024042	Sik1	Hrt-20|Msk|Sik|Sik-1|Snf1lk	salt inducible kinase 1	protein-coding	chr17:31873019-31875255	1.19748	0.0935603	39.1	37.91	33.69	30.62	12.65	37.72		chr17-14049		chr17-6258			chr17-4106	chr17-7635
Merged-chr7-24950458-2	chr7	24950137	24950766	+	6.705	Flag-3_Peaks|H2A2_Peaks	Intergenic	Intergenic	-5680	NM_001370804	232974		NM_001370804	ENSMUSG00000108367	Gm4881	EG232974	predicted gene 4881	protein-coding	chr7:24950137-24950766	1.19588	0.258436	7.6	6.32	5.97	5.67	6.54	9.43							chr7-1046	chr7-20796
Merged-chr4-95934819-6	chr4	95933929	95935830	+	38.14	CONTROL-1_Peaks|CONTROL-2_Peaks|CP27-1_Peaks|CP27-2_Peaks|Flag-3_Peaks|H2A2_Peaks	Intergenic	Intergenic	32156	NR_045777	319247	Mm.473527	NM_175680	ENSMUSG00000044125	9530080O11Rik	-	RIKEN cDNA 9530080O11 gene	ncRNA	chr4:95933929-95935830	1.19555	0.296162	60.82	48.68	47.37	44.22	14.39	60.87	chr4-6546	chr4-7349		chr4-4639	chr4-7796		chr4-3753	chr4-7218
Merged-chr4-105575638-2	chr4	105575279	105575994	+	8.52	Flag-3_Peaks|H2A2_Peaks	Intergenic	Intergenic	418289	NM_080555	67916	Mm.348326	NM_080555	ENSMUSG00000028517	Plpp3	1110003O22Rik|2610002D05Rik|AV025606|D4Bwg0538e|D4Bwg1535e|Lpp3|PRG-2|Ppab2b|Ppap2b	phospholipid phosphatase 3	protein-coding	chr4:105575279-105575994	1.19527	0.139015	11.95	9.29	9.83	7.94	10.03	8.14							chr4-1364	chr4-19837
Merged-chr15-93635469-6	chr15	93633383	93637066	+	41.7167	CONTROL-1_Peaks|CONTROL-2_Peaks|CP27-1_Peaks|CP27-2_Peaks|Flag-3_Peaks	Intergenic	Intergenic	-39322	NM_001033217	106042	Mm.150314	NM_001033217	ENSMUSG00000036158	Prickle1	1110058P22Rik|AW215793|Prickle|b2b019Clo|mpk1	prickle planar cell polarity protein 1	protein-coding	chr15:93633383-93637066	1.19508	0.175342	84.72	84.36	67.02	74.46	22.24	81.02	chr15-6582	chr15-9881		chr15-13133,chr15-17089	chr15-10763		chr15-5519
Merged-chr2-166781305-4	chr2	166780820	166781893	+	12.775	CONTROL-1_Peaks|CONTROL-2_Peaks|CP27-1_Peaks|Flag-3_Peaks	Intergenic	Intergenic	-12411	NM_023815	76367	Mm.330796	NM_023815	ENSMUSG00000042854	Trp53rkb	2810408M09Rik|4933401B08Rik|5630401H01Rik|Nori-2|PRPK|Tp53rk|Trp53rk|Trp53tk|mNori-2p	transformation related protein 53 regulating kinase B	protein-coding	chr2:166780820-166781893	1.19283	0.744949	13.03	15.24	16.14	7.56	12.21	12	chr2-14421	chr2-11596		chr2-19483			chr2-2637
Merged-chr9-21041614-6	chr9	21040575	21042235	+	21.085	CONTROL-1_Peaks|CONTROL-2_Peaks|CP27-1_Peaks|CP27-2_Peaks|Flag-3_Peaks|H2A2_Peaks	Intergenic	Intergenic	-9077	NR_035438	100316681		NR_035438	ENSMUSG00000084663	Mir1900	Mirn1900|mmu-mir-1900	microRNA 1900	ncRNA	chr9:21040575-21042235	1.19184	0.395112	30.41	29.73	22.11	28.35	10.47	34.72	chr9-12598	chr9-13052		chr9-7046	chr9-6158		chr9-261	chr9-9083
Merged-chr2-36230391-4	chr2	36229548	36231203	+	17.07	CONTROL-2_Peaks|CP27-2_Peaks|Flag-3_Peaks|H2A2_Peaks	promoter-TSS (NM_008969)	promoter-TSS (NM_008969)	-51	NM_008969	19224	Mm.275434	NM_008969	ENSMUSG00000047250	Ptgs1	COX1|Cox-1|Cox-3|PGHS-1|PHS 1|Pghs1	prostaglandin-endoperoxide synthase 1	protein-coding	chr2:36229548-36231203	1.19168	0.529727	21	29.73	21.4	21.17	15.26	29.58		chr2-20644			chr2-10309		chr2-6006	chr2-15536
Merged-chr17-14251116-2	chr17	14250614	14251686	+	8.255	CONTROL-2_Peaks|Flag-3_Peaks	Intergenic	Intergenic	-28356	NM_022315	64074	Mm.30162	NM_022315	ENSMUSG00000023886	Smoc2	1700056C05Rik|5430426J21Rik|Smoc2l	SPARC related modular calcium binding 2	protein-coding	chr17:14250614-14251686	1.19028	0.0540502	10.14	13.38	8.42	11.34	10.47	8.57		chr17-12240					chr17-3549
Merged-chr19-9065958-4	chr19	9065296	9066548	+	10.47	CONTROL-1_Peaks|CONTROL-2_Peaks|Flag-3_Peaks|H2A2_Peaks	intron (NM_001286518, intron 6 of 6)	intron (NM_001286518, intron 6 of 6)	22034	NM_011681	22287	Mm.2258	NM_011681	ENSMUSG00000024653	Scgb1a1	CC10|CC16|CCSP|PCB-BP|UG|UGB|Utg	secretoglobin, family 1A, member 1 (uteroglobin)	protein-coding	chr19:9065296-9066548	1.18755	0.611462	20.64	22.67	22.11	14.36	11.34	19.29	chr19-4576	chr19-5663					chr19-541	chr19-12427
Merged-chr17-64193270-2	chr17	64192648	64193894	+	15.77	CONTROL-1_Peaks|Flag-3_Peaks	Intergenic	Intergenic	138612	NM_144859	224938	Mm.489681	NM_144859	ENSMUSG00000024083	Pja2	AI447901|AL022700|Neurodap1|mKIAA0438	praja ring finger ubiquitin ligase 2	protein-coding	chr17:64192648-64193894	1.18755	0.168023	24.98	21.18	20.35	18.52	11.34	12	chr17-9722						chr17-4991
Merged-chr9-103008651-6	chr9	103007662	103009620	+	22.9733	CONTROL-1_Peaks|CONTROL-2_Peaks|CP27-1_Peaks|CP27-2_Peaks|Flag-3_Peaks|H2A2_Peaks	non-coding (NR_157194, exon 1 of 14)	non-coding (NR_157194, exon 1 of 14)	154	NR_157194	24059	Mm.207106	NM_033314	ENSMUSG00000032548	Slco2a1	2310021C19Rik|Pgt|Slc21a2	solute carrier organic anion transporter family, member 2a1	protein-coding	chr9:103007662-103009620	1.18705	0.0106093	35.84	32.7	30.53	27.21	13.52	39.44	chr9-5595	chr9-9542		chr9-8160	chr9-9723		chr9-340	chr9-11399
Merged-chr2-72996736-9	chr2	72994752	72998205	+	38.82	CONTROL-1_Peaks|CONTROL-2_Peaks|CP27-1_Peaks|CP27-2_Peaks|Flag-3_Peaks|H2A2_Peaks	Intergenic	Intergenic	-16032	NM_001018042	20687	Mm.124328	NM_011450	ENSMUSG00000027109	Sp3	D130027J01Rik	trans-acting transcription factor 3	protein-coding	chr2:72994752-72998205	1.18628	0.191675	87.62	85.47	78.25	67.66	21.37	90.45	chr2-18255,chr2-23740	chr2-24426,chr2-20896		chr2-18757	chr2-24183		chr2-6073	chr2-35967,chr2-27381
Merged-chr4-61711101-2	chr4	61710688	61711514	+	6.615	CONTROL-2_Peaks|Flag-3_Peaks	Intergenic	Intergenic	-37007	NM_001199333	100048884	Mm.335875	NM_001199333	ENSMUSG00000078674	Mup18	100039228|Gm12561|Mup16|Mup6|Mup9	major urinary protein 18	protein-coding	chr4:61710688-61711514	1.18626	0.513261	9.41	8.55	9.47	5.67	8.72	2.57		chr4-29752					chr4-4839
Merged-chr15-58508254-7	chr15	58507391	58509260	+	25.0943	CONTROL-1_Peaks|CONTROL-2_Peaks|CP27-1_Peaks|CP27-2_Peaks|Flag-3_Peaks|H2A2_Peaks	Intergenic	Intergenic	-1723	NM_001370912	631797		NM_001370912	ENSMUSG00000037106	Fer1l6	EG631797	fer-1-like 6 (C. elegans)	protein-coding	chr15:58507391-58509260	1.18444	0.536883	39.83	50.91	40.7	35.91	18.75	37.72	chr15-5950	chr15-4795		chr15-4251	chr15-4886		chr15-4306	chr15-8792,chr15-10253
Merged-chr15-88843893-6	chr15	88843112	88844597	+	31.4983	CONTROL-1_Peaks|CONTROL-2_Peaks|CP27-1_Peaks|CP27-2_Peaks|Flag-3_Peaks|H2A2_Peaks	Intergenic	Intergenic	-18340	NM_145478	223775	Mm.400129	NM_145478	ENSMUSG00000035828	Pim3	BC026639|Kid1	proviral integration site 3	protein-coding	chr15:88843112-88844597	1.18283	0.0182711	38.02	43.11	31.93	36.66	16.57	51.44	chr15-11555	chr15-17743		chr15-5483	chr15-6269		chr15-296	chr15-9431
Merged-chr1-51199538-2	chr1	51199196	51199880	+	5.89	CP27-2_Peaks|Flag-3_Peaks	Intergenic	Intergenic	-89588	NM_138741	20324	Mm.398690	NM_138741	ENSMUSG00000045954	Cavin2	Sdpr	caveolae associated 2	protein-coding	chr1:51199196-51199880	1.1828	0.389029	6.15	5.95	4.56	5.67	6.54	5.57					chr1-27321		chr1-6827
Merged-chr7-144981569-3	chr7	144980875	144982161	+	7.31667	CONTROL-2_Peaks|Flag-3_Peaks|H2A2_Peaks	Intergenic	Intergenic	-41593	NM_007631	12443	Mm.273049	NM_007631	ENSMUSG00000070348	Ccnd1	AI327039|CycD1|Cyl-1|PRAD1|bcl-1|cD1	cyclin D1	protein-coding	chr7:144980875-144982161	1.1823	0.210954	10.14	10.03	9.12	7.94	12.21	17.15		chr7-22165					chr7-1611	chr7-28126
Merged-chr10-10320932-6	chr10	10319512	10322314	+	42.7617	CONTROL-1_Peaks|CONTROL-2_Peaks|CP27-1_Peaks|CP27-2_Peaks|Flag-3_Peaks|H2A2_Peaks	Intergenic	Intergenic	151486	NM_001127353	215772	Mm.246573	NM_172547	ENSMUSG00000050994	Adgb	9130014G24Rik	androglobin	protein-coding	chr10:10319512-10322314	1.18102	0.0663104	66.62	61.32	55.79	52.54	13.95	65.58	chr10-14470	chr10-13776		chr10-6083	chr10-11959		chr10-961	chr10-16193
Merged-chr16-14237576-6	chr16	14236661	14238263	+	20.4067	CONTROL-1_Peaks|CONTROL-2_Peaks|CP27-1_Peaks|CP27-2_Peaks|Flag-3_Peaks|H2A2_Peaks	intron (NM_013607, intron 9 of 41)	MER20|DNA|hAT-Charlie	53946	NM_001161775	17880	Mm.250705	NM_013607	ENSMUSG00000018830	Myh11	AV071570|SM1|SM2|smMHC	myosin, heavy polypeptide 11, smooth muscle	protein-coding	chr16:14236661-14238263	1.18028	0.121902	34.03	34.19	29.83	27.97	13.08	27.01	chr16-2428	chr16-2222		chr16-4182	chr16-4174		chr16-567	chr16-8081
Merged-chr1-37300084-6	chr1	37299122	37301062	+	45.985	CONTROL-1_Peaks|CONTROL-2_Peaks|CP27-1_Peaks|CP27-2_Peaks|Flag-3_Peaks|H2A2_Peaks	5' UTR (NM_030266, exon 1 of 26)	5' UTR (NM_030266, exon 1 of 26)	254	NM_001290797	269180	Mm.5294	NM_030266	ENSMUSG00000026113	Inpp4a	107kDa|9630012D15|D130048C09Rik|R74740	inositol polyphosphate-4-phosphatase, type I	protein-coding	chr1:37299122-37301062	1.17958	0.167742	61.55	67.26	54.39	54.81	12.65	62.16	chr1-27119	chr1-20304		chr1-5251	chr1-4327		chr1-7773	chr1-21747
Merged-chr15-87822315-5	chr15	87821184	87823569	+	14.494	CONTROL-1_Peaks|CONTROL-2_Peaks|CP27-1_Peaks|CP27-2_Peaks|Flag-3_Peaks	Intergenic	Intergenic	-26433	NR_105817	102465209		NR_105817	ENSMUSG00000098938	Mir6393	Gm27424|mmu-mir-6393	microRNA 6393	ncRNA	chr15:87821184-87823569	1.1787	0.0745537	28.96	31.59	24.91	26.46	22.24	8.57	chr15-10966	chr15-10372		chr15-14153	chr15-13484		chr15-193
Merged-chr3-131894523-6	chr3	131893447	131895443	+	8.07333	CONTROL-1_Peaks|CONTROL-2_Peaks|CP27-1_Peaks|CP27-2_Peaks|Flag-3_Peaks|H2A2_Peaks	Intergenic	B4A|SINE|B4	-190847	NM_020265	56811	Mm.103593	NM_020265	ENSMUSG00000028031	Dkk2	-	dickkopf WNT signaling pathway inhibitor 2	protein-coding	chr3:131893447-131895443	1.17763	0.14573	24.26	21.55	20	18.9	11.34	21.43	chr3-21378	chr3-25457		chr3-20336	chr3-19845		chr3-713	chr3-17894
Merged-chr2-32625309-6	chr2	32624668	32626145	+	23.1133	CONTROL-1_Peaks|CONTROL-2_Peaks|CP27-1_Peaks|CP27-2_Peaks|Flag-3_Peaks|H2A2_Peaks	promoter-TSS (NM_001198791)	promoter-TSS (NM_001198791)	-31	NM_001198791	11636	Mm.29189	NM_021515	ENSMUSG00000026817	Ak1	Ak-1|B430205N08Rik	adenylate kinase 1	protein-coding	chr2:32624668-32626145	1.17618	0.228473	28.96	34.93	25.97	28.35	10.9	33.01	chr2-14649	chr2-10781		chr2-18523	chr2-26347		chr2-5186	chr2-31639
Merged-chr5-21533282-2	chr5	21532833	21533731	+	6.325	CP27-2_Peaks|Flag-3_Peaks	intron (NM_001199632, intron 12 of 20)	L2a|LINE|L2	-10245	NM_028977	74511	Mm.439963	NM_028977	ENSMUSG00000039883	Lrrc17	37kDa|4833425M04Rik|6130400C22Rik|P37nb	leucine rich repeat containing 17	protein-coding	chr5:21532833-21533731	1.17556	0.433233	11.59	6.69	9.12	6.43	8.29	12.86					chr5-19669		chr5-957
Merged-chr19-5988703-6	chr19	5987759	5989676	+	31.59	CONTROL-1_Peaks|CONTROL-2_Peaks|CP27-1_Peaks|CP27-2_Peaks|Flag-3_Peaks|H2A2_Peaks	3' UTR (NM_007600, exon 22 of 22)	3' UTR (NM_007600, exon 22 of 22)	-2574	NM_198650	381203	Mm.329638	NM_198650	ENSMUSG00000037451	Slc22a20	Gm963|OAT1-L|mOAT6	solute carrier family 22 (organic anion transporter), member 20	protein-coding	chr19:5987759-5989676	1.17555	0.114498	43.81	43.11	36.14	37.8	16.57	39.44	chr19-10031	chr19-4569		chr19-7188	chr19-4027		chr19-255	chr19-4738
Merged-chr19-5067691-6	chr19	5066669	5068869	+	44.9967	CONTROL-1_Peaks|CONTROL-2_Peaks|CP27-1_Peaks|CP27-2_Peaks|Flag-3_Peaks|H2A2_Peaks	promoter-TSS (NM_054042)	promoter-TSS (NM_054042)	-309	NM_054042	70445	Mm.29597	NM_054042	ENSMUSG00000056481	Cd248	2610111G01Rik|AI842296|Cd164l1|Tem1	CD248 antigen, endosialin	protein-coding	chr19:5066669-5068869	1.17451	0.591658	71.69	56.12	49.48	59.34	19.19	64.73	chr19-3215	chr19-4899		chr19-4041	chr19-6241		chr19-429	chr19-3372
Merged-chr1-125237259-6	chr1	125236337	125238342	+	23.0967	CONTROL-1_Peaks|CONTROL-2_Peaks|CP27-1_Peaks|CP27-2_Peaks|Flag-3_Peaks|H2A2_Peaks	Intergenic	Intergenic	198388	NM_001205386	74117	Mm.183102	NM_023735	ENSMUSG00000026341	Actr3	1200003A09Rik|Arp3	ARP3 actin-related protein 3	protein-coding	chr1:125236337-125238342	1.17443	0.373178	35.84	32.7	27.37	30.99	10.47	42.01	chr1-9957	chr1-16012		chr1-29256	chr1-9899		chr1-6509	chr1-12783
Merged-chr4-130874991-2	chr4	130874567	130875416	+	6.65	CP27-1_Peaks|Flag-3_Peaks	Intergenic	Intergenic	-38325	NM_010686	16792	Mm.271868	NM_010686	ENSMUSG00000028581	Laptm5	E3|Stra13	lysosomal-associated protein transmembrane 5	protein-coding	chr4:130874567-130875416	1.17377	0.781079	6.52	7.8	8.42	3.78	9.16	8.57				chr4-28687			chr4-1521
Merged-chr11-104628452-6	chr11	104627398	104629348	+	26.8733	CONTROL-1_Peaks|CONTROL-2_Peaks|CP27-1_Peaks|CP27-2_Peaks|Flag-3_Peaks|H2A2_Peaks	intron (NM_016780, intron 2 of 14)	intron (NM_016780, intron 2 of 14)	20373	NM_016780	16416	Mm.87150	NM_016780	ENSMUSG00000020689	Itgb3	CD61|GP3A|INGRB3	integrin beta 3	protein-coding	chr11:104627398-104629348	1.17179	0.365097	38.02	38.65	28.77	36.66	11.34	51.44	chr11-18477	chr11-15906		chr11-8346	chr11-5384		chr11-1804	chr11-19059
Merged-chr12-69734344-6	chr12	69733544	69735356	+	27.0417	CONTROL-1_Peaks|CONTROL-2_Peaks|CP27-1_Peaks|CP27-2_Peaks|Flag-3_Peaks|H2A2_Peaks	intron (NM_001361690, intron 2 of 5)	B2_Mm2|SINE|B2	9505	NM_001361690	68055	Mm.27844	NM_026536	ENSMUSG00000054894	Dmac2l	1110015E18Rik|ATPW|Atp5s	distal membrane arm assembly complex 2 like	protein-coding	chr12:69733544-69735356	1.17086	0.691086	39.46	32.7	24.21	37.42	12.65	44.15	chr12-2266	chr12-13634		chr12-9863	chr12-3106		chr12-95	chr12-2599
Merged-chr6-9693459-2	chr6	9692523	9694160	+	14.99	CONTROL-1_Peaks|Flag-3_Peaks	Intergenic	Lx5c|LINE|L1	743322	NM_008751	18231	Mm.46954	NM_008751	ENSMUSG00000046178	Nxph1	C130005L03Rik	neurexophilin 1	protein-coding	chr6:9692523-9694160	1.16991	0.316411	10.86	7.8	8.77	7.18	23.11	6	chr6-25068						chr6-747
Merged-chr6-99343643-3	chr6	99343116	99344259	+	6.36667	CONTROL-1_Peaks|CONTROL-2_Peaks|Flag-3_Peaks	intron (NM_053202, intron 1 of 18)	L2b|LINE|L2	-77172	NM_001197321	108655	Mm.234965	NM_053202	ENSMUSG00000030067	Foxp1	3110052D19Rik|4932443N09Rik|AI461938|AW494214	forkhead box P1	protein-coding	chr6:99343116-99344259	1.16779	0.311675	9.41	9.66	8.77	7.56	9.16	6.86	chr6-23904	chr6-20166					chr6-1240
Merged-chr1-78658090-6	chr1	78656612	78659133	+	57.885	CONTROL-1_Peaks|CONTROL-2_Peaks|CP27-1_Peaks|CP27-2_Peaks|Flag-3_Peaks|H2A2_Peaks	promoter-TSS (NM_001136226)	promoter-TSS (NM_001136226)	47	NM_001033606	74205	Mm.276016	NM_028817	ENSMUSG00000032883	Acsl3	2610510B12Rik|Acs3|C85929|Facl3|Pro2194	acyl-CoA synthetase long-chain family member 3	protein-coding	chr1:78656612-78659133	1.16731	0.543204	71.32	88.45	72.99	63.88	13.08	92.59	chr1-13868	chr1-16754		chr1-28440	chr1-4852		chr1-8090	chr1-21145
Merged-chr3-108445039-6	chr3	108443808	108446369	+	60.785	CONTROL-1_Peaks|CONTROL-2_Peaks|CP27-1_Peaks|CP27-2_Peaks|Flag-3_Peaks|H2A2_Peaks	exon (NM_001204979, exon 1 of 11)	exon (NM_001204979, exon 1 of 11)	171	NM_011319	20226	Mm.28688	NM_011319	ENSMUSG00000068739	Sars	Sars1|Strs|serRS	seryl-aminoacyl-tRNA synthetase	protein-coding	chr3:108443808-108446369	1.16684	0.332438	83.27	82.13	78.25	63.5	19.19	89.16	chr3-8912	chr3-8098		chr3-8596	chr3-8174		chr3-659	chr3-11186
Merged-chr15-97102451-6	chr15	97100733	97105448	+	52.0583	CONTROL-1_Peaks|CONTROL-2_Peaks|CP27-1_Peaks|CP27-2_Peaks|Flag-3_Peaks|H2A2_Peaks	Intergenic	Intergenic	-47134	NM_027052	69354	Mm.250980	NM_027052	ENSMUSG00000022464	Slc38a4	1110012E16Rik|1700012A18Rik|Ata3|mATA3|mNAT3	solute carrier family 38, member 4	protein-coding	chr15:97100733-97105448	1.16455	0.342125	93.77	93.28	88.43	72.19	25.73	112.31	chr15-12291	chr15-10976		chr15-7714	chr15-9516		chr15-5622	chr15-9459
Merged-chr17-45596292-6	chr17	45594643	45598168	+	50.9467	CONTROL-1_Peaks|CONTROL-2_Peaks|CP27-1_Peaks|CP27-2_Peaks|Flag-3_Peaks|H2A2_Peaks	promoter-TSS (NM_001199116)	promoter-TSS (NM_001199116)	-503	NM_001199114	63959	Mm.29744	NM_022880	ENSMUSG00000023942	Slc29a1	1200014D21Rik|AA407560|ENT1	solute carrier family 29 (nucleoside transporters), member 1	protein-coding	chr17:45594643-45598168	1.16301	0.00994637	73.86	81.39	62.81	70.68	22.24	72.44	chr17-7560	chr17-6533		chr17-9844	chr17-10150		chr17-2476	chr17-33093
Merged-chr15-81936798-6	chr15	81935653	81937778	+	27.1833	CONTROL-1_Peaks|CONTROL-2_Peaks|CP27-1_Peaks|CP27-2_Peaks|Flag-3_Peaks|H2A2_Peaks	promoter-TSS (NM_145473)	promoter-TSS (NM_145473)	-44	NM_145473	105859	Mm.22524	NM_145473	ENSMUSG00000042109	Csdc2	AI415250|AI481750|Pippin	cold shock domain containing C2, RNA binding	protein-coding	chr15:81935653-81937778	1.16026	0.00293822	52.5	41.62	45.97	35.15	18.32	56.15	chr15-5194	chr15-9364		chr15-6708	chr15-6527		chr15-2741	chr15-14667
Merged-chr2-32288355-6	chr2	32287160	32289285	+	44.3517	CONTROL-1_Peaks|CONTROL-2_Peaks|CP27-1_Peaks|CP27-2_Peaks|Flag-3_Peaks|H2A2_Peaks	promoter-TSS (NM_001290552)	promoter-TSS (NM_001290552)	-104	NM_001362696	99412	Mm.106376	NM_133852	ENSMUSG00000002546	Golga2	AW555139|GM130	golgi autoantigen, golgin subfamily a, 2	protein-coding	chr2:32287160-32289285	1.15899	0.052994	60.1	58.72	52.63	49.89	12.65	60.01	chr2-16175	chr2-26124		chr2-10321	chr2-21396		chr2-7083	chr2-21700
Merged-chr1-183697075-5	chr1	183696611	183697505	+	9.574	CONTROL-1_Peaks|CONTROL-2_Peaks|CP27-1_Peaks|Flag-3_Peaks|H2A2_Peaks	Intergenic	HAL1|LINE|L1	-51919	NR_151520	102637191	Mm.417076	NR_151520	ENSMUSG00000103305	Gm34068	-	predicted gene, 34068	ncRNA	chr1:183696611-183697505	1.15688	0.193962	12.67	10.78	11.58	8.69	9.16	10.29	chr1-14355	chr1-23385		chr1-18761			chr1-9292	chr1-35211
Merged-chr4-132270470-6	chr4	132269818	132271355	+	26.825	CONTROL-1_Peaks|CONTROL-2_Peaks|CP27-1_Peaks|CP27-2_Peaks|Flag-3_Peaks|H2A2_Peaks	promoter-TSS (NR_002865)	promoter-TSS (NR_002865)	-400	NR_002865	353373	Mm.424675	NR_002865		Rnu11	MBII-407|Mirn801|mir-801|mmu-mir-801	U11 small nuclear RNA	snRNA	chr4:132269818-132271355	1.1561	0.63947	32.22	41.99	35.09	29.1	12.21	35.58	chr4-21698	chr4-17351		chr4-11745	chr4-24107		chr4-928	chr4-10647
Merged-chr4-128883643-6	chr4	128882774	128884751	+	58.0567	CONTROL-1_Peaks|CONTROL-2_Peaks|CP27-1_Peaks|CP27-2_Peaks|Flag-3_Peaks|H2A2_Peaks	promoter-TSS (NM_178110)	promoter-TSS (NM_178110)	-282	NM_001370756	67525	Mm.30653	NM_178110	ENSMUSG00000041000	Trim62	6330414G21Rik|AI450348|Dear1	tripartite motif-containing 62	protein-coding	chr4:128882774-128884751	1.15547	0.397131	73.5	83.99	70.53	65.77	13.08	78.87	chr4-34894	chr4-15010		chr4-19057	chr4-16781		chr4-7787	chr4-7275
Merged-chr10-114988057-2	chr10	114987710	114988404	+	6.955	CP27-1_Peaks|Flag-3_Peaks	Intergenic	Intergenic	186331	NR_155864	102633245		NR_155864		Gm15723	-	predicted gene 15723	ncRNA	chr10:114987710-114988404	1.15269	0.529727	7.97	7.43	8.07	5.29	7.85	7.72				chr10-13096			chr10-1565
Merged-chr19-53312066-6	chr19	53309532	53315142	+	167.928	CONTROL-1_Peaks|CONTROL-2_Peaks|CP27-1_Peaks|CP27-2_Peaks|Flag-3_Peaks|H2A2_Peaks	intron (NM_001360348, intron 1 of 5)	intron (NM_001360348, intron 1 of 5)	892	NM_001360348	17859	Mm.2154	NM_010847	ENSMUSG00000025025	Mxi1	Gm10197|Mad2|bHLHc11	MAX interactor 1, dimerization protein	protein-coding	chr19:53309532-53315142	1.15248	0.0741914	227.01	235.24	200.01	201.08	23.98	205.33	chr19-8076	chr19-8660		chr19-6660	chr19-7477		chr19-677	chr19-11464
Merged-chr5-100567469-6	chr5	100566055	100568552	+	43.3017	CONTROL-1_Peaks|CONTROL-2_Peaks|CP27-1_Peaks|CP27-2_Peaks|Flag-3_Peaks|H2A2_Peaks	intron (NM_139198, intron 1 of 4)	Lx8|LINE|L1	-4207	NM_001370754	231507	Mm.34609	NM_139198	ENSMUSG00000029322	Plac8	C15|D5Wsu111e	placenta-specific 8	protein-coding	chr5:100566055-100568552	1.1519	0.277593	60.46	53.14	49.48	49.14	20.5	63.01	chr5-19740	chr5-25063		chr5-8441	chr5-13075		chr5-2009	chr5-9027
Merged-chr15-74716723-5	chr15	74716371	74717160	+	8.512	CONTROL-1_Peaks|CONTROL-2_Peaks|CP27-1_Peaks|CP27-2_Peaks|Flag-3_Peaks	3' UTR (NM_028216, exon 3 of 3)	3' UTR (NM_028216, exon 3 of 3)	1926	NM_028216	72373	Mm.46395	NM_028216	ENSMUSG00000022598	Psca	2210408B04Rik	prostate stem cell antigen	protein-coding	chr15:74716371-74717160	1.15132	0.358859	10.86	11.89	8.42	11.34	8.29	11.15	chr15-16906	chr15-21024		chr15-18741	chr15-16167		chr15-4768
Merged-chr3-103792086-7	chr3	103789814	103794347	+	61.4343	CONTROL-1_Peaks|CONTROL-2_Peaks|CP27-1_Peaks|CP27-2_Peaks|Flag-3_Peaks|H2A2_Peaks	promoter-TSS (NM_010432)	promoter-TSS (NM_010432)	-517	NM_001301304	15257	Mm.20827	NM_010432	ENSMUSG00000008730	Hipk1	1110062K04Rik|Myak	homeodomain interacting protein kinase 1	protein-coding	chr3:103789814-103794347	1.15109	0.611484	102.46	121.52	108.78	85.8	26.6	106.31	chr3-10950	chr3-22285,chr3-8516		chr3-5872	chr3-14111		chr3-1242	chr3-16047
Merged-chr1-172027032-6	chr1	172025629	172028451	+	86.0067	CONTROL-1_Peaks|CONTROL-2_Peaks|CP27-1_Peaks|CP27-2_Peaks|Flag-3_Peaks|H2A2_Peaks	5' UTR (NM_033509, exon 1 of 8)	5' UTR (NM_033509, exon 1 of 8)	255	NM_033509	93840	Mm.36148	NM_033509	ENSMUSG00000026556	Vangl2	C530001F03Rik|Lootl|Lp|Lpp1|Ltap|Vang1l2|loop-tail|ska17|ska<m17Jus>|stbm|strabismus	VANGL planar cell polarity 2	protein-coding	chr1:172025629-172028451	1.15065	0.142434	114.77	114.83	103.16	96.38	18.75	130.31	chr1-16056	chr1-12253		chr1-16271	chr1-18238		chr1-7490	chr1-39842
Merged-chr5-26157515-6	chr5	26155980	26159342	+	40.625	CONTROL-1_Peaks|CONTROL-2_Peaks|CP27-1_Peaks|CP27-2_Peaks|Flag-3_Peaks|H2A2_Peaks	Intergenic	Intergenic	-36236	NM_001134299	434689	Mm.484129	NM_001134299	ENSMUSG00000067698	Gm10220	-	predicted gene 10220	protein-coding	chr5:26155980-26159342	1.1488	0.0220935	70.24	65.41	61.76	56.32	22.24	39.44	chr5-9118	chr5-14595		chr5-15115	chr5-5814		chr5-435	chr5-19448
Merged-chr1-120396196-2	chr1	120395639	120396987	+	9.77	CONTROL-1_Peaks|Flag-3_Peaks	Intergenic	Intergenic	55731	NM_207233	226359	Mm.337409	NM_207233	ENSMUSG00000036907	C1ql2	Adii|BC040774|CTRP10	complement component 1, q subcomponent-like 2	protein-coding	chr1:120395639-120396987	1.14854	0.704833	15.57	10.41	10.53	12.09	9.16	7.72	chr1-23766						chr1-8436
Merged-chr9-57147847-6	chr9	57146554	57149193	+	57.5733	CONTROL-1_Peaks|CONTROL-2_Peaks|CP27-1_Peaks|CP27-2_Peaks|Flag-3_Peaks|H2A2_Peaks	intron (NR_151685, intron 1 of 8)	intron (NR_151685, intron 1 of 8)	432	NM_028347	72774	Mm.35749	NM_028347	ENSMUSG00000032298	Neil1	2810450N13Rik|NEH1|Nei1	nei endonuclease VIII-like 1 (E. coli)	protein-coding	chr9:57146554-57149193	1.14832	0.310346	80.74	75.81	65.27	71.06	11.77	79.3	chr9-5492	chr9-3050		chr9-7981	chr9-5688		chr9-300	chr9-15096
Merged-chr11-102319000-6	chr11	102316086	102321296	+	96.935	CONTROL-1_Peaks|CONTROL-2_Peaks|CP27-1_Peaks|CP27-2_Peaks|Flag-3_Peaks|H2A2_Peaks	promoter-TSS (NM_001362548)	promoter-TSS (NM_001362548)	405	NM_001302955	21429	Mm.2845	NM_011551	ENSMUSG00000020923	Ubtf	A930005G04Rik|NOR-90|Tcfubf|UBF|UBF-1|UBF1	upstream binding transcription factor, RNA polymerase I	protein-coding	chr11:102316086-102321296	1.1475	0.128243	132.87	133.04	112.29	119.44	28.78	110.17	chr11-18430	chr11-16738		chr11-19316	chr11-11007		chr11-1109	chr11-18414
Merged-chr3-88579233-6	chr3	88578139	88580383	+	72.7683	CONTROL-1_Peaks|CONTROL-2_Peaks|CP27-1_Peaks|CP27-2_Peaks|Flag-3_Peaks|H2A2_Peaks	promoter-TSS (NM_001356319)	promoter-TSS (NM_001356319)	-347	NM_001356317	66256	Mm.7091	NM_025448	ENSMUSG00000041355	Ssr2	1500032E05Rik|AI315033|AU020133|SSR-beta|TLAP|TRAPB|TRAPbeta	signal sequence receptor, beta	protein-coding	chr3:88578139-88580383	1.14626	0.0867357	95.22	95.14	81.41	84.66	13.52	95.16	chr3-12194	chr3-19855		chr3-12270	chr3-17004		chr3-286	chr3-15219
Merged-chr4-86445222-2	chr4	86444813	86445631	+	6.855	CONTROL-1_Peaks|Flag-3_Peaks	exon (NM_001081096, exon 4 of 4)	exon (NM_001081096, exon 4 of 4)	113081	NM_001081096	75811	Mm.56451	NM_001081096	ENSMUSG00000028492	Saxo1	4930500O09Rik|Fam154a	stabilizer of axonemal microtubules 1	protein-coding	chr4:86444813-86445631	1.14619	0.854342	10.86	7.8	4.56	11.72	9.16	4.72	chr4-17701						chr4-6347
Merged-chr4-66414836-6	chr4	66413995	66415569	+	44.88	CONTROL-1_Peaks|CONTROL-2_Peaks|CP27-1_Peaks|CP27-2_Peaks|Flag-3_Peaks|H2A2_Peaks	Intergenic	Intergenic	-10299	NM_207109	56079	Mm.445312	NM_019514	ENSMUSG00000028373	Astn2	1d8|Astnl|bM452J22.1	astrotactin 2	protein-coding	chr4:66413995-66415569	1.14613	0.0617772	55.76	59.46	49.13	51.4	13.52	79.73	chr4-12788	chr4-10439		chr4-3016	chr4-4107		chr4-1764	chr4-8853
Merged-chr3-138054642-7	chr3	138052863	138056363	+	48.2129	CONTROL-1_Peaks|CONTROL-2_Peaks|CP27-1_Peaks|CP27-2_Peaks|Flag-3_Peaks|H2A2_Peaks	intron (NR_037975, intron 1 of 3)	intron (NR_037975, intron 1 of 3)	-7629	NM_001370862	102634333	Mm.45669	NM_001370862	ENSMUSG00000090066	1110002E22Rik	100039528|AI415341|Gm2292	RIKEN cDNA 1110002E22 gene	protein-coding	chr3:138052863-138056363	1.14597	0.195357	89.06	85.85	74.39	78.24	18.75	86.59	chr3-9447	chr3-12777		chr3-3453	chr3-7099		chr3-137	chr3-20079,chr3-24480
Merged-chr11-102607356-6	chr11	102606664	102608109	+	20.085	CONTROL-1_Peaks|CONTROL-2_Peaks|CP27-1_Peaks|CP27-2_Peaks|Flag-3_Peaks|H2A2_Peaks	3' UTR (NM_020510, exon 1 of 1)	3' UTR (NM_020510, exon 1 of 1)	2955	NM_020510	57265	Mm.36416	NM_020510	ENSMUSG00000050288	Fzd2	AL033370|AW456835|Fz10|Fzd10|Mfz10|Mfz10a	frizzled class receptor 2	protein-coding	chr11:102606664-102608109	1.14522	0.298338	28.24	28.62	22.81	26.84	13.95	30.43	chr11-13733	chr11-15875		chr11-16832	chr11-14023		chr11-835	chr11-12206
Merged-chr9-57765435-6	chr9	57764150	57766733	+	68.8067	CONTROL-1_Peaks|CONTROL-2_Peaks|CP27-1_Peaks|CP27-2_Peaks|Flag-3_Peaks|H2A2_Peaks	exon (NM_007713, exon 1 of 13)	exon (NM_007713, exon 1 of 13)	419	NM_007713	102414	Mm.25720	NM_007713	ENSMUSG00000032316	Clk3	AI256811	CDC-like kinase 3	protein-coding	chr9:57764150-57766733	1.14354	0.303635	91.6	94.02	85.97	76.35	13.95	91.3	chr9-4997	chr9-4027		chr9-9013	chr9-6603		chr9-303	chr9-9915
Merged-chr15-9772867-5	chr15	9772197	9773976	+	13.214	CONTROL-1_Peaks|CONTROL-2_Peaks|CP27-2_Peaks|Flag-3_Peaks|H2A2_Peaks	Intergenic	Intergenic	-24218	NM_001305044	320277	Mm.127822	NM_177123	ENSMUSG00000072663	Spef2	C230086A09Rik	sperm flagellar 2	protein-coding	chr15:9772197-9773976	1.14268	0.421133	21	26.01	20.35	20.79	13.95	37.72	chr15-11771	chr15-10539			chr15-16958		chr15-1822	chr15-15606
Merged-chr17-27565719-6	chr17	27564579	27566885	+	58.5833	CONTROL-1_Peaks|CONTROL-2_Peaks|CP27-1_Peaks|CP27-2_Peaks|Flag-3_Peaks|H2A2_Peaks	promoter-TSS (NM_001002895)	promoter-TSS (NM_001002895)	-5	NM_001002895	106672	Mm.61488	NM_001002895	ENSMUSG00000062753	AI413582	AI854251|Smim29	expressed sequence AI413582	protein-coding	chr17:27564579-27566885	1.14172	0.234204	73.5	78.04	67.72	65.01	20.06	93.88	chr17-9130	chr17-7474		chr17-9240	chr17-7426		chr17-191	chr17-20011
Merged-chr5-146824631-3	chr5	146823959	146825357	+	11.6367	CONTROL-1_Peaks|CP27-1_Peaks|Flag-3_Peaks	Intergenic	MTEa|LTR|ERVL-MaLR	-8232	NM_019647	19933	Mm.316592	NM_019647	ENSMUSG00000041453	Rpl21	8430440E03Rik|L21	ribosomal protein L21	protein-coding	chr5:146823959-146825357	1.14128	0.0496617	19.19	10.78	17.19	9.07	7.85	13.29	chr5-13372			chr5-13834			chr5-2601
Merged-chr4-80835554-2	chr4	80835092	80836080	+	8.925	CONTROL-2_Peaks|Flag-3_Peaks	intron (NM_031202, intron 2 of 7)	intron (NM_031202, intron 2 of 7)	1373	NM_001282015	22178	Mm.30438	NM_031202	ENSMUSG00000005994	Tyrp1	Oca3|TRP-1|TRP1|Tyrp|b|brown|isa	tyrosinase-related protein 1	protein-coding	chr4:80835092-80836080	1.13974	0.583859	9.05	13.38	9.47	10.21	10.9	11.57		chr4-18076					chr4-1199
Merged-chr1-182029085-6	chr1	182027246	182031057	+	60.8117	CONTROL-1_Peaks|CONTROL-2_Peaks|CP27-1_Peaks|CP27-2_Peaks|Flag-3_Peaks|H2A2_Peaks	Intergenic	Intergenic	-9171	NM_001083120	13800	Mm.87759	NM_008680	ENSMUSG00000022995	Enah	Mena|NDPP-1|Ndpp1|WBP8	ENAH actin regulator	protein-coding	chr1:182027246-182031057	1.1397	0.204655	84.72	90.68	77.55	76.35	25.29	114.45	chr1-14341	chr1-8894		chr1-26949	chr1-29900		chr1-9262	chr1-22373
Merged-chr8-105225047-6	chr8	105223472	105226383	+	77.5583	CONTROL-1_Peaks|CONTROL-2_Peaks|CP27-1_Peaks|CP27-2_Peaks|Flag-3_Peaks|H2A2_Peaks	promoter-TSS (NM_145604)	promoter-TSS (NM_145604)	-261	NM_145604	234678	Mm.27186	NM_145604	ENSMUSG00000031889	D230025D16Rik	BC006874|Lin10	RIKEN cDNA D230025D16 gene	protein-coding	chr8:105223472-105226383	1.13761	0.0303166	105.72	100.71	92.64	88.82	16.14	102.45	chr8-6603	chr8-9395		chr8-7534	chr8-5645		chr8-308	chr8-12005
Merged-chr5-114639543-5	chr5	114638833	114640510	+	14.388	CONTROL-1_Peaks|CONTROL-2_Peaks|CP27-1_Peaks|CP27-2_Peaks|Flag-3_Peaks	intron (NM_022017, intron 3 of 15)	intron (NM_022017, intron 3 of 15)	18750	NM_022017	63873	Mm.266450	NM_022017	ENSMUSG00000014158	Trpv4	0610033B08Rik|OTRPC4|Trp12|VR-OAC|VRL-2|VROAC	transient receptor potential cation channel, subfamily V, member 4	protein-coding	chr5:114638833-114640510	1.1372	0.363998	22.81	26.01	21.76	21.17	10.03	29.15	chr5-17073	chr5-10253		chr5-6237	chr5-8934		chr5-1220
Merged-chr17-35274990-3	chr17	35274491	35275575	+	20.2467	CONTROL-1_Peaks|CP27-2_Peaks|Flag-3_Peaks	Intergenic	Intergenic	11910	NM_001267808	14980	Mm.439675	NM_001267808		H2-L	H-2L	histocompatibility 2, D region locus L	protein-coding	chr17:35274491-35275575	1.13683	0.635055	33.31	26.01	24.21	27.97	8.72	33.01	chr17-4640				chr17-5138		chr17-4236
Merged-chr10-17161774-2	chr10	17161439	17162109	+	5.73	CONTROL-1_Peaks|Flag-3_Peaks	Intergenic	RLTR17|LTR|ERVK	-65992	NR_038020	100504235	Mm.84044	NR_038020	ENSMUSG00000101969	Gm20125	-	predicted gene, 20125	ncRNA	chr10:17161439-17162109	1.13672	0.746014	7.24	7.06	8.42	4.16	6.11	6	chr10-23205						chr10-547
Merged-chr11-109843805-2	chr11	109843496	109844114	+	6.025	Flag-3_Peaks|H2A2_Peaks	Intergenic	Intergenic	-2073	NR_045909	73257	Mm.250442	NR_045909	ENSMUSG00000087393	1700023C21Rik	-	RIKEN cDNA 1700023C21 gene	ncRNA	chr11:109843496-109844114	1.13665	0.756961	5.43	3.72	3.51	4.54	7.85	5.57							chr11-1141	chr11-31765
Merged-chr10-40258341-6	chr10	40256322	40260823	+	83.28	CONTROL-1_Peaks|CONTROL-2_Peaks|CP27-1_Peaks|CP27-2_Peaks|Flag-3_Peaks|H2A2_Peaks	promoter-TSS (NM_001359491)	promoter-TSS (NM_001359491)	104	NR_002842	19850	Mm.424506	NR_002842		Rnu3a	-	U3A small nuclear RNA	snRNA	chr10:40256322-40260823	1.1358	0.0286863	113.32	116.69	98.95	103.56	24.86	130.74	chr10-11318	chr10-25577		chr10-3755	chr10-4013		chr10-370	chr10-8703
Merged-chr17-45741705-2	chr17	45741386	45742024	+	6.695	CP27-1_Peaks|Flag-3_Peaks	intron (NR_152153, intron 1 of 4)	B1_Mur4|SINE|Alu	7199	NR_152153	433111	Mm.213441	NR_152153	ENSMUSG00000097727	F630040K05Rik	-	RIKEN cDNA F630040K05 gene	ncRNA	chr17:45741386-45742024	1.13328	0.829129	5.79	8.92	8.07	4.91	6.98	4.29				chr17-12720			chr17-4453
Merged-chr17-87763426-6	chr17	87762471	87764365	+	60.3067	CONTROL-1_Peaks|CONTROL-2_Peaks|CP27-1_Peaks|CP27-2_Peaks|Flag-3_Peaks|H2A2_Peaks	intron (NM_199251, intron 1 of 1)	intron (NM_199251, intron 1 of 1)	34576	NM_199251	210741	Mm.312046	NM_199251	ENSMUSG00000050138	Kcnk12	mntk1	potassium channel, subfamily K, member 12	protein-coding	chr17:87762471-87764365	1.13307	0.178079	79.29	78.41	67.37	71.81	15.7	80.59	chr17-8665	chr17-9382		chr17-6177	chr17-22432		chr17-988	chr17-14528
Merged-chr7-99864800-6	chr7	99863202	99866070	+	38.9683	CONTROL-1_Peaks|CONTROL-2_Peaks|CP27-1_Peaks|CP27-2_Peaks|Flag-3_Peaks|H2A2_Peaks	intron (NM_001164258, intron 2 of 18)	intron (NM_001164258, intron 2 of 18)	5418	NM_001164258	446101	Mm.440757	NM_001164258	ENSMUSG00000035211	Xrra1	AI449753	X-ray radiation resistance associated 1	protein-coding	chr7:99863202-99866070	1.13268	0.427429	52.86	53.51	51.58	42.33	16.14	63.87	chr7-22685	chr7-17116		chr7-20128	chr7-18099		chr7-1563	chr7-15055
Merged-chr16-31521392-4	chr16	31520778	31521861	+	9.2125	CP27-1_Peaks|CP27-2_Peaks|Flag-3_Peaks|H2A2_Peaks	Intergenic	Intergenic	-91543	NR_152205	100047123	Mm.466711	NR_152205		Gm15743	-	predicted gene 15743	ncRNA	chr16:31520778-31521861	1.13125	0.307178	13.03	14.12	12.28	11.72	10.03	18.86				chr16-7692	chr16-5594		chr16-703	chr16-8230
Merged-chr12-98996837-6	chr12	98995872	98997887	+	35.3067	CONTROL-1_Peaks|CONTROL-2_Peaks|CP27-1_Peaks|CP27-2_Peaks|Flag-3_Peaks|H2A2_Peaks	Intergenic	Intergenic	76305	NM_029553	76260	Mm.282660	NM_029553	ENSMUSG00000021013	Ttc8	0610012F22Rik|AV001447|BBS8	tetratricopeptide repeat domain 8	protein-coding	chr12:98995872-98997887	1.13094	0.169024	50.69	46.82	43.51	42.71	12.65	51.87	chr12-7052	chr12-9531		chr12-6351	chr12-4018		chr12-292	chr12-5715
Merged-chr7-44849663-6	chr7	44848187	44850851	+	59.0733	CONTROL-1_Peaks|CONTROL-2_Peaks|CP27-1_Peaks|CP27-2_Peaks|Flag-3_Peaks|H2A2_Peaks	promoter-TSS (NM_001290694)	promoter-TSS (NM_001290694)	-116	NM_001290694	67605	Mm.148007	NM_026270	ENSMUSG00000011096	Akt1s1	1110012J22Rik|AI227026|Lobe|Lobel|PRAS40	AKT1 substrate 1 (proline-rich)	protein-coding	chr7:44848187-44850851	1.12719	0.29184	85.81	70.61	72.63	66.14	15.26	90.02	chr7-14297	chr7-12259		chr7-3602	chr7-7796		chr7-1217	chr7-20956
Merged-chr17-16737778-3	chr17	16737257	16738396	+	8.47333	CONTROL-1_Peaks|CP27-2_Peaks|Flag-3_Peaks	Intergenic	RMER17B2|LTR|ERVK	-326277	NM_001163919	449000	Mm.483718	NM_001005358	ENSMUSG00000096696	Zfp960	-	zinc finger protein 960	protein-coding	chr17:16737257-16738396	1.12624	0.852814	12.67	8.92	6.32	12.85	10.03	7.29	chr17-14581				chr17-15649		chr17-3617
Merged-chr11-102656447-6	chr11	102655237	102657942	+	77.6517	CONTROL-1_Peaks|CONTROL-2_Peaks|CP27-1_Peaks|CP27-2_Peaks|Flag-3_Peaks|H2A2_Peaks	Intergenic	RSINE1|SINE|B4	-8996	NM_001127576	268491	Mm.447643	NM_001127576	ENSMUSG00000051455	Meioc	Gm1564|Gm663	meiosis specific with coiled-coil domain	protein-coding	chr11:102655237-102657942	1.12321	0.617037	107.17	89.19	80.71	94.11	16.57	118.74	chr11-11592	chr11-12544		chr11-20899	chr11-10555		chr11-684	chr11-20443
Merged-chr1-192166906-2	chr1	192166548	192167264	+	5.925	Flag-3_Peaks|H2A2_Peaks	Intergenic	Intergenic	-23871	NM_001038607	16510	Mm.4489	NM_010600	ENSMUSG00000058248	Kcnh1	EAG1|Kv10.1|M-eag	potassium voltage-gated channel, subfamily H (eag-related), member 1	protein-coding	chr1:192166548-192167264	1.123	0.888672	5.79	3.34	2.46	5.67	7.41	8.14							chr1-7638	chr1-51750
Merged-chr17-85822016-4	chr17	85821693	85822425	+	6.765	CP27-1_Peaks|CP27-2_Peaks|Flag-3_Peaks|H2A2_Peaks	Intergenic	Intergenic	-133805	NM_011380	20472	Mm.5039	NM_011380	ENSMUSG00000024134	Six2	-	sine oculis-related homeobox 2	protein-coding	chr17:85821693-85822425	1.12222	0.00663122	7.97	9.66	7.02	8.69	7.85	9.86				chr17-22654	chr17-16939		chr17-5624	chr17-17478
Merged-chr2-158159903-4	chr2	158159558	158160374	+	8.3675	CONTROL-1_Peaks|CONTROL-2_Peaks|Flag-3_Peaks|H2A2_Peaks	Intergenic	Intergenic	-13574	NM_009373	21817	Mm.330731	NM_009373	ENSMUSG00000037820	Tgm2	G[a]h|TG2|TGase2|tTG|tTGas	transglutaminase 2, C polypeptide	protein-coding	chr2:158159558-158160374	1.12189	0.115213	11.22	10.41	9.83	9.45	9.59	10.72	chr2-19953	chr2-17846					chr2-6295	chr2-25338
Merged-chr15-81529068-6	chr15	81527898	81530253	+	37.9067	CONTROL-1_Peaks|CONTROL-2_Peaks|CP27-1_Peaks|CP27-2_Peaks|Flag-3_Peaks|H2A2_Peaks	Intergenic	Intergenic	-57139	NM_177821	328572	Mm.258397	NM_177821	ENSMUSG00000055024	Ep300	A430090G16|A730011L11|KAT3B|p300|p300 HAT	E1A binding protein p300	protein-coding	chr15:81527898-81530253	1.12181	0.0811751	56.84	61.69	51.23	54.43	17.44	45.01	chr15-36976	chr15-19348		chr15-5686	chr15-5997		chr15-2730	chr15-10337
Merged-chr4-117891931-6	chr4	117891208	117892877	+	53.6983	CONTROL-1_Peaks|CONTROL-2_Peaks|CP27-1_Peaks|CP27-2_Peaks|Flag-3_Peaks|H2A2_Peaks	promoter-TSS (NM_026344)	promoter-TSS (NM_026344)	-39	NM_026344	67728	Mm.13823	NM_026344	ENSMUSG00000028540	Dph2	9130020C19Rik|AI467389|Dph2l2	DPH2 homolog	protein-coding	chr4:117891208-117892877	1.12034	0.00383758	69.88	69.12	62.46	61.61	17.44	80.59	chr4-6593	chr4-6541		chr4-7247	chr4-6188		chr4-7288	chr4-10002
Merged-chr1-88277627-6	chr1	88276211	88279526	+	216.233	CONTROL-1_Peaks|CONTROL-2_Peaks|CP27-1_Peaks|CP27-2_Peaks|Flag-3_Peaks|H2A2_Peaks	promoter-TSS (NM_172505)	promoter-TSS (NM_172505)	-289	NM_198652	381280	Mm.384762	NM_198652	ENSMUSG00000044783	Hjurp	6430706D22Rik|A730008H23Rik|C330011F01Rik|Gm975|Mfleg1	Holliday junction recognition protein	protein-coding	chr1:88276211-88279526	1.12002	0.0662721	295.43	311.05	266.33	275.16	39.25	342.5	chr1-1179	chr1-704		chr1-3669	chr1-5038		chr1-5678	chr1-4099
Merged-chr4-95017406-3	chr4	95017147	95017673	+	7.19	CONTROL-1_Peaks|CONTROL-2_Peaks|Flag-3_Peaks	Intergenic	ORR1C1|LTR|ERVL-MaLR	34812	NM_010591	16476	Mm.275071	NM_010591	ENSMUSG00000052684	Jun	AP-1|Junc|c-jun	jun proto-oncogene	protein-coding	chr4:95017147-95017673	1.11923	0.632548	7.97	7.8	8.42	5.67	6.54	6.43	chr4-21090	chr4-22039					chr4-3734
Merged-chr11-116130884-6	chr11	116129910	116131868	+	42.6333	CONTROL-1_Peaks|CONTROL-2_Peaks|CP27-1_Peaks|CP27-2_Peaks|Flag-3_Peaks|H2A2_Peaks	TTS (NM_024177)	TTS (NM_024177)	239	NM_178802	338364	Mm.439976	NM_178802	ENSMUSG00000054517	Trim65	4732463G12Rik	tripartite motif-containing 65	protein-coding	chr11:116129910-116131868	1.11528	0.545873	58.65	52.03	46.32	52.92	19.62	75.44	chr11-12682	chr11-8162		chr11-7094	chr11-5199		chr11-561	chr11-8831
Merged-chr3-123509558-6	chr3	123508125	123511277	+	72.865	CONTROL-1_Peaks|CONTROL-2_Peaks|CP27-1_Peaks|CP27-2_Peaks|Flag-3_Peaks|H2A2_Peaks	Intergenic	Intergenic	-1365	NR_028574	69895	Mm.260791	NR_028574	ENSMUSG00000104960	Snhg8	1110065M07Rik|2010109N14Rik	small nucleolar RNA host gene 8	ncRNA	chr3:123508125-123511277	1.11479	0.0646028	91.96	94.02	81.41	85.42	19.19	112.31	chr3-16366	chr3-5016		chr3-14745	chr3-17500		chr3-1364	chr3-16949
Merged-chr15-64588141-5	chr15	64587388	64588586	+	12.47	CONTROL-1_Peaks|CONTROL-2_Peaks|CP27-1_Peaks|CP27-2_Peaks|Flag-3_Peaks	Intergenic	RMER1B|Other|Other	-205068	NM_010026	13196	Mm.277236	NM_010026	ENSMUSG00000022377	Asap1	AV239055|DEF-1|Ddef1|PAP|mKIAA1249|s19	ArfGAP with SH3 domain, ankyrin repeat and PH domain1	protein-coding	chr15:64587388-64588586	1.11345	0.569831	18.1	21.55	18.6	17.01	13.52	11.15	chr15-31459	chr15-13887		chr15-15161	chr15-10561		chr15-1281
Merged-chr19-5912808-6	chr19	5911758	5913834	+	40.19	CONTROL-1_Peaks|CONTROL-2_Peaks|CP27-1_Peaks|CP27-2_Peaks|Flag-3_Peaks|H2A2_Peaks	promoter-TSS (NM_011262)	promoter-TSS (NM_011262)	75	NM_011262	19708	Mm.2651	NM_011262	ENSMUSG00000024826	Dpf2	2210010M07Rik|BAF45D|Req|ubi-d4	D4, zinc and double PHD fingers family 2	protein-coding	chr19:5911758-5913834	1.11293	0.0852962	53.95	54.26	47.72	49.51	15.26	46.72	chr19-4558	chr19-3059		chr19-9056	chr19-4416		chr19-467	chr19-6243
Merged-chr7-19562676-6	chr7	19561219	19564012	+	76.6917	CONTROL-1_Peaks|CONTROL-2_Peaks|CP27-1_Peaks|CP27-2_Peaks|Flag-3_Peaks|H2A2_Peaks	promoter-TSS (NM_199149)	promoter-TSS (NM_199149)	-217	NM_199149	232947	Mm.219662	NM_199149	ENSMUSG00000051403	Ppp1r37	Gm158|Lrrc68	protein phosphatase 1, regulatory subunit 37	protein-coding	chr7:19561219-19564012	1.1128	0.442795	106.81	98.48	87.72	96.76	22.68	109.74	chr7-10972	chr7-6803		chr7-12276	chr7-15604		chr7-281	chr7-15937
Merged-chr6-83156331-6	chr6	83155320	83157553	+	53.6067	CONTROL-1_Peaks|CONTROL-2_Peaks|CP27-1_Peaks|CP27-2_Peaks|Flag-3_Peaks|H2A2_Peaks	promoter-TSS (NM_001362119)	promoter-TSS (NM_001362119)	32	NM_027948	71837	Mm.17621	NM_027948	ENSMUSG00000030030	1700003E16Rik	AU041756	RIKEN cDNA 1700003E16 gene	protein-coding	chr6:83155320-83157553	1.11035	0.532782	74.94	67.64	60	68.41	13.52	80.16	chr6-13728	chr6-14019		chr6-9613	chr6-14213		chr6-2282	chr6-26639
Merged-chr3-41347027-5	chr3	41346186	41347819	+	12.412	CONTROL-1_Peaks|CONTROL-2_Peaks|CP27-1_Peaks|Flag-3_Peaks|H2A2_Peaks	Intergenic	Intergenic	146197	NR_040385	78706	Mm.366094	NR_040385	ENSMUSG00000097639	Platr4	C430002E04Rik	pluripotency associated transcript 4	ncRNA	chr3:41346186-41347819	1.11006	0.128446	22.45	21.93	20.7	19.28	8.72	24	chr3-20096	chr3-26863		chr3-7568			chr3-920	chr3-10980
Merged-chr5-111602555-4	chr5	111601793	111603318	+	12.4125	CONTROL-1_Peaks|CONTROL-2_Peaks|Flag-3_Peaks|H2A2_Peaks	Intergenic	Intergenic	20994	NR_015546	330164	Mm.193276	NM_177875	ENSMUSG00000052848	C130026L21Rik	-	RIKEN cDNA C130026L21 gene	ncRNA	chr5:111601793-111603318	1.10516	0.605137	18.46	14.12	14.74	14.74	10.9	26.15	chr5-18374	chr5-15060					chr5-1182	chr5-16491
Merged-chr15-41168620-2	chr15	41168195	41169112	+	8.485	CP27-1_Peaks|Flag-3_Peaks	Intergenic	RMER19B|LTR|ERVK	-5048	NR_151516	100418302		NR_151516		4930555K19Rik	-	leucine rich repeat and sterile alpha motif containing 1 pseudogene	pseudo	chr15:41168195-41169112	1.10318	0.773527	9.05	9.66	10.53	6.43	10.47	10.72				chr15-14781			chr15-678
Merged-chr1-177727768-2	chr1	177727320	177728334	+	6.68	Flag-3_Peaks|H2A2_Peaks	Intergenic	Intergenic	-1987	NM_027077	69428	Mm.84467	NM_027077	ENSMUSG00000015962	1700016C15Rik	-	RIKEN cDNA 1700016C15 gene	protein-coding	chr1:177727320-177728334	1.1027	0.742238	8.33	10.03	9.47	7.18	10.47	16.72							chr1-6253	chr1-51263
Merged-chr19-6236446-6	chr19	6234790	6237674	+	123.24	CONTROL-1_Peaks|CONTROL-2_Peaks|CP27-1_Peaks|CP27-2_Peaks|Flag-3_Peaks|H2A2_Peaks	promoter-TSS (NM_198168)	promoter-TSS (NM_198168)	-392	NM_198168	225849	Mm.118076	NM_198168	ENSMUSG00000024777	Ppp2r5b	B'beta|BC026670	protein phosphatase 2, regulatory subunit B', beta	protein-coding	chr19:6234790-6237674	1.10246	0.287711	165.1	152.74	143.16	145.14	19.62	166.32	chr19-5168	chr19-8794		chr19-3191	chr19-3154		chr19-480	chr19-4311
Merged-chr3-108771863-5	chr3	108770050	108773276	+	47.802	CONTROL-1_Peaks|CONTROL-2_Peaks|CP27-2_Peaks|Flag-3_Peaks|H2A2_Peaks	intron (NM_177859, intron 6 of 11)	intron (NM_177859, intron 6 of 11)	32005	NM_177859	329738	Mm.72322	NM_177859	ENSMUSG00000049565	Aknad1	4921525H12Rik	AKNA domain containing 1	protein-coding	chr3:108770050-108773276	1.10069	0.139267	60.46	66.89	53.34	62.36	20.5	92.59	chr3-8914	chr3-11186			chr3-9209		chr3-663	chr3-28099
Merged-chr5-36742429-6	chr5	36741874	36743173	+	17.8633	CONTROL-1_Peaks|CONTROL-2_Peaks|CP27-1_Peaks|CP27-2_Peaks|Flag-3_Peaks|H2A2_Peaks	Intergenic	Intergenic	6156	NM_133724	117197	Mm.46744	NM_133724	ENSMUSG00000060708	Bloc1s4	2610101N07Rik|Blos4|Cno	biogenesis of lysosomal organelles complex-1, subunit 4, cappuccino	protein-coding	chr5:36741874-36743173	1.10064	0.845274	25.71	20.44	15.09	26.84	11.77	28.29	chr5-13647	chr5-12320		chr5-8712	chr5-9659		chr5-660	chr5-11674
Merged-chr1-179141245-4	chr1	179140838	179141875	+	8.9675	CONTROL-1_Peaks|CONTROL-2_Peaks|Flag-3_Peaks|H2A2_Peaks	intron (NM_027188, intron 5 of 11)	intron (NM_027188, intron 5 of 11)	376685	NM_027188	69726	Mm.222338	NM_027188	ENSMUSG00000055067	Smyd3	2410008A19Rik|Zmynd1	SET and MYND domain containing 3	protein-coding	chr1:179140838-179141875	1.09948	0.742238	12.67	8.55	9.47	9.83	13.08	14.15	chr1-22522	chr1-27835					chr1-6679	chr1-25042
Merged-chr16-18248956-6	chr16	18247877	18250239	+	46.3617	CONTROL-1_Peaks|CONTROL-2_Peaks|CP27-1_Peaks|CP27-2_Peaks|Flag-3_Peaks|H2A2_Peaks	promoter-TSS (NM_011239)	promoter-TSS (NM_011239)	175	NM_001081000	15547	Mm.271798	NM_008307	ENSMUSG00000022721	Trmt2a	Htf9c	TRM2 tRNA methyltransferase 2A	protein-coding	chr16:18247877-18250239	1.09848	0.312642	59.38	62.43	56.84	54.05	18.32	69.87	chr16-4268	chr16-2536		chr16-3545	chr16-4913		chr16-602	chr16-3543
Merged-chr5-22410302-2	chr5	22409903	22410701	+	7	CP27-1_Peaks|Flag-3_Peaks	Intergenic	RLTR17|LTR|ERVK	-65597	NM_001310464	19699	Mm.425236	NM_011261	ENSMUSG00000042453	Reln	reeler|rl	reelin	protein-coding	chr5:22409903-22410701	1.09688	0.72521	9.78	7.43	7.37	8.32	8.29	8.57				chr5-15080			chr5-432
Merged-chr10-127070615-6	chr10	127069791	127071660	+	34.5633	CONTROL-1_Peaks|CONTROL-2_Peaks|CP27-1_Peaks|CP27-2_Peaks|Flag-3_Peaks|H2A2_Peaks	promoter-TSS (NM_025982)	promoter-TSS (NM_025982)	244	NR_040660	100504703	Mm.387029	NR_040660	ENSMUSG00000112639	A730063M14Rik	-	RIKEN cDNA A730063M14 gene	ncRNA	chr10:127069791-127071660	1.09651	0.403716	48.51	49.43	47.37	41.95	10.47	48.44	chr10-9886	chr10-8080		chr10-5318	chr10-6256		chr10-511	chr10-9717
Merged-chr15-88921689-6	chr15	88920540	88922973	+	60.6017	CONTROL-1_Peaks|CONTROL-2_Peaks|CP27-1_Peaks|CP27-2_Peaks|Flag-3_Peaks|H2A2_Peaks	intron (NM_001357736, intron 8 of 11)	intron (NM_001357736, intron 8 of 11)	32662	NM_001357736	239591	Mm.86807	NM_172818	ENSMUSG00000022388	Ttll8	1700019P01Rik|4933401B17	tubulin tyrosine ligase-like family, member 8	protein-coding	chr15:88920540-88922973	1.09608	0.0763549	85.08	73.95	78.95	66.14	18.75	86.16	chr15-18632	chr15-23687		chr15-4435	chr15-7228		chr15-1589	chr15-31416
Merged-chr15-99652136-6	chr15	99650639	99653347	+	82.6267	CONTROL-1_Peaks|CONTROL-2_Peaks|CP27-1_Peaks|CP27-2_Peaks|Flag-3_Peaks|H2A2_Peaks	promoter-TSS (NM_012025)	promoter-TSS (NM_012025)	-337	NM_001253809	26934	Mm.273804	NM_012025	ENSMUSG00000023015	Racgap1	AI227039|AI327394|Band25|GTPase|MgcRacGAP|gtl11|mKIAA1478	Rac GTPase-activating protein 1	protein-coding	chr15:99650639-99653347	1.09594	0.39028	103.18	114.09	100.36	97.89	18.32	129.03	chr15-4862	chr15-6928		chr15-11420	chr15-6046		chr15-5718	chr15-8218
Merged-chr10-109561094-5	chr10	109560067	109561867	+	11.436	CONTROL-1_Peaks|CONTROL-2_Peaks|CP27-1_Peaks|Flag-3_Peaks|H2A2_Peaks	Intergenic	IMPB_01|Satellite|Satellite	439423	NM_001368815	260315	Mm.225050	NM_177797	ENSMUSG00000020181	Nav3	4732483H20Rik|9630020C08Rik|POMFIL1|Pomfil1p|mKIAA0938|unc53H3	neuron navigator 3	protein-coding	chr10:109560067-109561867	1.09489	0.351999	24.26	21.55	21.05	20.79	13.52	21.86	chr10-20133	chr10-19013		chr10-10542			chr10-1533	chr10-22883
Merged-chr8-34965730-6	chr8	34964189	34967263	+	57.585	CONTROL-1_Peaks|CONTROL-2_Peaks|CP27-1_Peaks|CP27-2_Peaks|Flag-3_Peaks|H2A2_Peaks	promoter-TSS (NM_175091)	promoter-TSS (NM_175091)	-36	NM_175091	21951	Mm.88364	NM_175091	ENSMUSG00000031529	Tnks	4930554K12Rik|AI662855|ARTD5|C86528|D130072O21Rik|TANK1|mTNKS1	tankyrase, TRF1-interacting ankyrin-related ADP-ribose polymerase	protein-coding	chr8:34964189-34967263	1.09447	0.415016	74.58	81.01	72.99	69.17	15.26	81.45	chr8-11735	chr8-8038		chr8-10255	chr8-7623		chr8-101	chr8-10372
Merged-chr17-55976462-4	chr17	55975958	55977246	+	11.55	CONTROL-1_Peaks|CONTROL-2_Peaks|CP27-1_Peaks|Flag-3_Peaks	TTS (NM_009168)	TTS (NM_009168)	6120	NM_009168	20420	Mm.20908	NM_009168	ENSMUSG00000039154	Shd	AI413439	src homology 2 domain-containing transforming protein D	protein-coding	chr17:55975958-55977246	1.09234	0.81218	17.74	23.78	21.76	16.25	12.21	13.29	chr17-19048	chr17-12624		chr17-15168			chr17-850
Merged-chr15-61679627-4	chr15	61679092	61680289	+	11.7025	CP27-1_Peaks|CP27-2_Peaks|Flag-3_Peaks|H2A2_Peaks	Intergenic	Intergenic	94761	NR_040350	432956	Mm.404918	NR_040350	ENSMUSG00000116031	D030024E09Rik	-	RIKEN cDNA D030024E09 gene	ncRNA	chr15:61679092-61680289	1.09172	0.655174	14.84	19.32	15.79	15.5	15.26	30.43				chr15-11116	chr15-10525		chr15-4412	chr15-8333
Merged-chr6-29432176-9	chr6	29430179	29434701	+	70.0778	CONTROL-1_Peaks|CONTROL-2_Peaks|CP27-1_Peaks|CP27-2_Peaks|Flag-3_Peaks|H2A2_Peaks	promoter-TSS (NM_001311074)	promoter-TSS (NM_001311074)	-713	NM_001081185	68794	Mm.39046	NM_026839	ENSMUSG00000068699	Flnc	1110055E19Rik|ABP-280|ABPL|Fln2	filamin C, gamma	protein-coding	chr6:29430179-29434701	1.09017	0.113088	141.56	141.96	131.94	128.13	33.14	170.61	chr6-6648	chr6-10634		chr6-2852,chr6-14325	chr6-8986,chr6-9550		chr6-1841	chr6-6152,chr6-9266
Merged-chr15-27630726-6	chr15	27629805	27631923	+	75.2567	CONTROL-1_Peaks|CONTROL-2_Peaks|CP27-1_Peaks|CP27-2_Peaks|Flag-3_Peaks|H2A2_Peaks	promoter-TSS (NM_001013792)	promoter-TSS (NM_001013792)	-171	NM_001013792	432940	Mm.309164	NM_001013792	ENSMUSG00000046034	Otulin	C79097|Fam105b|m3Sapc|m7-1Sapc	OTU deubiquitinase with linear linkage specificity	protein-coding	chr15:27629805-27631923	1.08992	0.201594	105.72	94.76	94.74	89.2	14.39	92.16	chr15-17648	chr15-18342		chr15-15984	chr15-7030		chr15-3673	chr15-13701
Merged-chr15-76538671-6	chr15	76537524	76540023	+	99.3467	CONTROL-1_Peaks|CONTROL-2_Peaks|CP27-1_Peaks|CP27-2_Peaks|Flag-3_Peaks|H2A2_Peaks	promoter-TSS (NM_029643)	promoter-TSS (NM_029643)	-27	NM_013909	30840	Mm.275279	NM_013909	ENSMUSG00000022559	Fbxl6	AU021795|Fbl6	F-box and leucine-rich repeat protein 6	protein-coding	chr15:76537524-76540023	1.08921	0.30694	124.91	144.56	119.65	127.75	17.44	121.74	chr15-8895	chr15-7097		chr15-5051	chr15-4567		chr15-4861	chr15-5046
Merged-chr2-26562024-5	chr2	26561530	26562472	+	12.254	CONTROL-2_Peaks|CP27-1_Peaks|CP27-2_Peaks|Flag-3_Peaks|H2A2_Peaks	Intergenic	Intergenic	-19082	NM_178444	353156	Mm.268933	NM_178444	ENSMUSG00000026921	Egfl7	VE-statin|Zneu1	EGF-like domain 7	protein-coding	chr2:26561530-26562472	1.08881	0.81922	12.31	19.32	15.44	13.61	8.29	18		chr2-14619		chr2-14328	chr2-11769		chr2-7011	chr2-25783
Merged-chr13-78723814-6	chr13	78723168	78724543	+	12.285	CONTROL-1_Peaks|CONTROL-2_Peaks|CP27-1_Peaks|CP27-2_Peaks|Flag-3_Peaks|H2A2_Peaks	Intergenic	AT_rich|Low_complexity|Low_complexity	-524982	NM_010151	13865	Mm.439653	NM_010151	ENSMUSG00000069171	Nr2f1	COUP-TF1|COUP-TFI|COUPTFA|EAR-3|EAR3|Erbal3|SVP44|Tcfcoup1	nuclear receptor subfamily 2, group F, member 1	protein-coding	chr13:78723168-78724543	1.08772	0.239865	17.38	17.09	15.44	16.25	10.47	18.43	chr13-11009	chr13-6690		chr13-5163	chr13-6321		chr13-262	chr13-11768
Merged-chr2-30266688-6	chr2	30265440	30267780	+	20.83	CONTROL-1_Peaks|CONTROL-2_Peaks|CP27-1_Peaks|CP27-2_Peaks|Flag-3_Peaks|H2A2_Peaks	promoter-TSS (NM_001281829)	promoter-TSS (NM_001281829)	-111	NM_001281829	227696	Mm.297949	NM_172267	ENSMUSG00000079484	Phyhd1	-	phytanoyl-CoA dioxygenase domain containing 1	protein-coding	chr2:30265440-30267780	1.08169	0.6676	32.95	43.85	35.09	35.91	15.26	31.29	chr2-10675	chr2-10763		chr2-9880	chr2-16801		chr2-5172	chr2-20787
Merged-chr15-39334742-3	chr15	39334040	39335344	+	17.39	CONTROL-1_Peaks|CONTROL-2_Peaks|Flag-3_Peaks	intron (NM_053271, intron 4 of 26)	MT2B1|LTR|ERVL	136406	NM_053271	116838	Mm.309296	NM_053271	ENSMUSG00000037386	Rims2	2810036I15Rik|AW048769|RIM2|Rab3ip2|Rim2(+40A)|Rim2(+44A)|Rim2(+4A)|Serg2|Syt3-rs|mKIAA0751	regulating synaptic membrane exocytosis 2	protein-coding	chr15:39334040-39335344	1.08166	0.130279	24.98	24.16	23.51	21.92	8.72	30.43	chr15-14298	chr15-8720					chr15-3937
Merged-chr10-128547309-6	chr10	128545974	128548160	+	28.8233	CONTROL-1_Peaks|CONTROL-2_Peaks|CP27-1_Peaks|CP27-2_Peaks|Flag-3_Peaks|H2A2_Peaks	intron (NM_134003, intron 1 of 2)	intron (NM_134003, intron 1 of 2)	679	NM_134003	103284	Mm.68289	NM_134003	ENSMUSG00000039810	Zc3h10	AI790326	zinc finger CCCH type containing 10	protein-coding	chr10:128545974-128548160	1.08076	0.561825	44.17	40.14	37.19	40.82	17.01	45.01	chr10-13424	chr10-12758		chr10-22644	chr10-17357		chr10-903	chr10-5895
Merged-chr8-94707358-6	chr8	94706524	94708386	+	14.665	CONTROL-1_Peaks|CONTROL-2_Peaks|CP27-1_Peaks|CP27-2_Peaks|Flag-3_Peaks|H2A2_Peaks	Intergenic	Intergenic	-11213	NM_026385	67801	Mm.279977	NM_026385	ENSMUSG00000031775	Pllp	0610010I06Rik|AV001002|Plapi|Tm4sf11	plasma membrane proteolipid	protein-coding	chr8:94706524-94708386	1.08021	0.091408	23.53	21.18	22.11	19.28	15.26	26.58	chr8-9160	chr8-6943		chr8-9116	chr8-9582		chr8-53	chr8-8087
Merged-chr15-102247868-6	chr15	102246985	102248749	+	20.58	CONTROL-1_Peaks|CONTROL-2_Peaks|CP27-1_Peaks|CP27-2_Peaks|Flag-3_Peaks|H2A2_Peaks	intron (NM_011244, intron 3 of 9)	CpG	-1367	NM_001042727	19411	Mm.1273	NM_011244	ENSMUSG00000001288	Rarg	Nr1b3|RAR-gamma|RARD|RARgamma2	retinoic acid receptor, gamma	protein-coding	chr15:102246985-102248749	1.08006	0.259453	30.41	30.84	29.12	27.59	12.65	25.72	chr15-28696	chr15-9488		chr15-22051	chr15-21305		chr15-3124	chr15-10434
Merged-chr12-80141324-6	chr12	80140272	80141960	+	12.6333	CONTROL-1_Peaks|CONTROL-2_Peaks|CP27-1_Peaks|CP27-2_Peaks|Flag-3_Peaks|H2A2_Peaks	Intergenic	Intergenic	-8272	NR_033514	69548	Mm.269712	NR_033514		2310015A10Rik	5330419I17Rik	RIKEN cDNA 2310015A10 gene	ncRNA	chr12:80140272-80141960	1.07972	0.240446	26.43	23.41	23.86	22.3	12.21	29.58	chr12-12890	chr12-8734		chr12-4514	chr12-7026		chr12-499	chr12-5675
Merged-chr15-5116063-6	chr15	5114672	5117348	+	75.7333	CONTROL-1_Peaks|CONTROL-2_Peaks|CP27-1_Peaks|CP27-2_Peaks|Flag-3_Peaks|H2A2_Peaks	promoter-TSS (NM_026069)	promoter-TSS (NM_026069)	-603	NM_026069	67281	Mm.10474	NM_026069	ENSMUSG00000041841	Rpl37	3110005M08Rik	ribosomal protein L37	protein-coding	chr15:5114672-5117348	1.07716	0.0557979	94.86	97.37	87.37	91.09	28.78	98.59	chr15-17438	chr15-16610		chr15-7094	chr15-6654		chr15-561	chr15-13641
Merged-chr17-72918121-6	chr17	72916728	72919924	+	108.802	CONTROL-1_Peaks|CONTROL-2_Peaks|CP27-1_Peaks|CP27-2_Peaks|Flag-3_Peaks|H2A2_Peaks	promoter-TSS (NM_029999)	promoter-TSS (NM_029999)	21	NM_029999	77889	Mm.154109	NM_029999	ENSMUSG00000024063	Lbh	1810009F10Rik|6720416L16Rik	limb-bud and heart	protein-coding	chr17:72916728-72919924	1.07555	0.609586	148.44	132.3	124.57	136.45	32.27	146.6	chr17-7341	chr17-5620		chr17-4349	chr17-2889		chr17-935	chr17-6211
Merged-chr17-85731681-4	chr17	85731023	85732122	+	7.645	CONTROL-1_Peaks|CONTROL-2_Peaks|Flag-3_Peaks|H2A2_Peaks	Intergenic	Intergenic	-43318	NM_011380	20472	Mm.5039	NM_011380	ENSMUSG00000024134	Six2	-	sine oculis-related homeobox 2	protein-coding	chr17:85731023-85732122	1.07542	0.684098	10.86	13.38	11.58	10.96	9.59	16.72	chr17-16612	chr17-12135					chr17-1711	chr17-26056
Merged-chr15-66891611-6	chr15	66890665	66892972	+	53.48	CONTROL-1_Peaks|CONTROL-2_Peaks|CP27-1_Peaks|CP27-2_Peaks|Flag-3_Peaks|H2A2_Peaks	intron (NM_018865, intron 1 of 4)	intron (NM_018865, intron 1 of 4)	449	NM_018865	22402	Mm.10222	NM_018865	ENSMUSG00000005124	Ccn4	AW146261|Elm1|Wisp1	cellular communication network factor 4	protein-coding	chr15:66890665-66892972	1.07497	0.392576	70.24	73.58	68.78	65.01	19.62	68.59	chr15-5740	chr15-19116		chr15-8865	chr15-14543		chr15-2416	chr15-9080
Merged-chr1-164539040-4	chr1	164538434	164540520	+	15.8625	CONTROL-1_Peaks|CP27-2_Peaks|Flag-3_Peaks|H2A2_Peaks	Intergenic	(TCCA)n|Simple_repeat|Simple_repeat	36170	NR_151593	102635083	Mm.98705	NR_151593	ENSMUSG00000097281	Gm26685	-	predicted gene, 26685	ncRNA	chr1:164538434-164540520	1.07455	0.291355	14.48	14.49	12.98	13.98	41.43	14.57	chr1-26384				chr1-23508		chr1-5949	chr1-28330
Merged-chr5-41708280-6	chr5	41706657	41709709	+	109.708	CONTROL-1_Peaks|CONTROL-2_Peaks|CP27-1_Peaks|CP27-2_Peaks|Flag-3_Peaks|H2A2_Peaks	promoter-TSS (NR_132325)	promoter-TSS (NR_132325)	-4	NM_001310590	100972	Mm.41555	NM_027295	ENSMUSG00000029128	Rab28	2700023P08Rik|AW496496	RAB28, member RAS oncogene family	protein-coding	chr5:41706657-41709709	1.07414	0.0961532	149.53	134.16	138.25	125.86	16.14	153.89	chr5-22990	chr5-21727		chr5-5784	chr5-9219		chr5-677	chr5-20660
Merged-chr3-102204762-6	chr3	102203575	102206150	+	50.9733	CONTROL-1_Peaks|CONTROL-2_Peaks|CP27-1_Peaks|CP27-2_Peaks|Flag-3_Peaks|H2A2_Peaks	promoter-TSS (NM_177545)	promoter-TSS (NM_177545)	-169	NM_177545	229658	Mm.118004	NM_177545	ENSMUSG00000027860	Vangl1	Kitenin|Lpp2|Stb2|Stbm	VANGL planar cell polarity 1	protein-coding	chr3:102203575-102206150	1.0717	0.344042	69.51	68.75	62.11	66.9	18.32	82.73	chr3-4821	chr3-7697		chr3-9037	chr3-11119		chr3-631	chr3-10403
Merged-chr7-44777379-3	chr7	44776713	44777989	+	13.5667	CONTROL-2_Peaks|CP27-1_Peaks|Flag-3_Peaks	3' UTR (NM_133945, exon 15 of 15)	3' UTR (NM_133945, exon 15 of 15)	28722	NM_133945	101568	Mm.28816	NM_133945	ENSMUSG00000002205	Vrk3	AI428238	vaccinia related kinase 3	protein-coding	chr7:44776713-44777989	1.07148	0.871525	13.03	16.35	16.84	10.58	15.26	13.72		chr7-22825		chr7-8814			chr7-179
Merged-chr16-17508650-6	chr16	17506776	17510211	+	95.6	CONTROL-1_Peaks|CONTROL-2_Peaks|CP27-1_Peaks|CP27-2_Peaks|Flag-3_Peaks|H2A2_Peaks	promoter-TSS (NM_001331227)	promoter-TSS (NM_001331227)	-190	NM_001331227	66863	Mm.161726	NM_025808	ENSMUSG00000022761	Lztr1	1200003E21Rik|AI591627|AW550890	leucine-zipper-like transcriptional regulator, 1	protein-coding	chr16:17506776-17510211	1.06832	0.151923	120.93	134.9	114.74	124.73	23.11	137.6	chr16-10323	chr16-4893		chr16-3176	chr16-971		chr16-148	chr16-4259
Merged-chr15-76523077-6	chr15	76521719	76524577	+	98.4167	CONTROL-1_Peaks|CONTROL-2_Peaks|CP27-1_Peaks|CP27-2_Peaks|Flag-3_Peaks|H2A2_Peaks	Intergenic	CpG	-1019	NM_130893	170729	Mm.218747	NM_130893	ENSMUSG00000048385	Scrt1	-	scratch family zinc finger 1	protein-coding	chr15:76521719-76524577	1.06796	0.448684	133.6	127.1	118.25	125.86	25.29	123.45	chr15-36691	chr15-17574		chr15-18797	chr15-16203		chr15-2616	chr15-28536
Merged-chr2-31759929-6	chr2	31759270	31760644	+	22.3067	CONTROL-1_Peaks|CONTROL-2_Peaks|CP27-1_Peaks|CP27-2_Peaks|Flag-3_Peaks|H2A2_Peaks	promoter-TSS (NM_001283045)	promoter-TSS (NM_001283045)	18	NM_009594	11350	Mm.1318	NM_009594	ENSMUSG00000026842	Abl1	AI325092|Abl|E430008G22Rik|c-Abl	c-abl oncogene 1, non-receptor tyrosine kinase	protein-coding	chr2:31759270-31760644	1.06577	0.736909	30.41	30.84	24.21	33.26	11.34	38.58	chr2-8842	chr2-7051		chr2-10751	chr2-11257		chr2-7077	chr2-5975
Merged-chr10-117906198-6	chr10	117905030	117907076	+	47.8633	CONTROL-1_Peaks|CONTROL-2_Peaks|CP27-1_Peaks|CP27-2_Peaks|Flag-3_Peaks|H2A2_Peaks	Intergenic	Intergenic	-19406	NR_045342	71067	Mm.410793	NR_045342	ENSMUSG00000112500	4933411E08Rik	-	RIKEN cDNA 4933411E08 gene	ncRNA	chr10:117905030-117907076	1.06553	0.663085	60.82	62.43	63.51	52.16	13.08	69.44	chr10-11759	chr10-15939		chr10-7956	chr10-17257		chr10-492	chr10-15261
Merged-chr5-145657473-2	chr5	145657091	145657856	+	7.17	CONTROL-2_Peaks|Flag-3_Peaks	Intergenic	RLTR45|LTR|ERVK	62663	NM_017396	53973	Mm.379071	NM_017396	ENSMUSG00000075551	Cyp3a41a	Cyp3a41	cytochrome P450, family 3, subfamily a, polypeptide 41A	protein-coding	chr5:145657091-145657856	1.06485	0.58628	8.69	10.03	7.37	10.21	10.9	12.43		chr5-20938					chr5-890
Merged-chr12-26071729-2	chr12	26071386	26072187	+	8.31	CP27-1_Peaks|Flag-3_Peaks	Intergenic	Intergenic	138719	NR_131149	629481	Mm.390460	NR_131149	ENSMUSG00000113550	Gm29687	-	predicted gene, 29687	ncRNA	chr12:26071386-26072187	1.06415	0.220452	10.14	5.95	9.83	5.29	8.29	8.14				chr12-8787			chr12-67
Merged-chr2-179648814-6	chr2	179647639	179650218	+	73.1467	CONTROL-1_Peaks|CONTROL-2_Peaks|CP27-1_Peaks|CP27-2_Peaks|Flag-3_Peaks|H2A2_Peaks	intron (NM_001316723, intron 2 of 5)	intron (NM_001316723, intron 2 of 5)	206497	NM_009867	12561	Mm.184711	NM_009867	ENSMUSG00000000305	Cdh4	AW120700|R-CAD|R-Cadh|Rcad	cadherin 4	protein-coding	chr2:179647639-179650218	1.06411	0.10476	91.24	90.68	86.67	84.29	16.14	120.02	chr2-7897	chr2-4101		chr2-4483	chr2-11149		chr2-5397	chr2-43460
Merged-chr5-137600844-6	chr5	137599100	137602476	+	89.0283	CONTROL-1_Peaks|CONTROL-2_Peaks|CP27-1_Peaks|CP27-2_Peaks|Flag-3_Peaks|H2A2_Peaks	promoter-TSS (NM_001254762)	promoter-TSS (NM_001254762)	-80	NM_001254762	68929	Mm.41355	NM_030037	ENSMUSG00000037221	Mospd3	1190005J19Rik|5133401H10Rik|Gtig2|R124	motile sperm domain containing 3	protein-coding	chr5:137599100-137602476	1.0634	0.35031	118.39	110.74	107.37	108.1	15.7	129.03	chr5-20189	chr5-16375		chr5-15962	chr5-9031		chr5-2455	chr5-33453
Merged-chr9-54735755-8	chr9	54733796	54737965	+	45.83	CONTROL-1_Peaks|CONTROL-2_Peaks|CP27-1_Peaks|CP27-2_Peaks|Flag-3_Peaks|H2A2_Peaks	Intergenic	Charlie4a|DNA|hAT-Charlie	-1331	NM_001025375	66317	Mm.28437	NM_023191	ENSMUSG00000061559	Wdr61	2700038L12Rik|2810418I05Rik|REC14	WD repeat domain 61	protein-coding	chr9:54733796-54737965	1.06311	0.535298	83.27	85.85	83.86	75.22	21.37	96.45	chr9-8585	chr9-13467		chr9-7147,chr9-5867	chr9-11001		chr9-297	chr9-11211,chr9-3981
Merged-chr15-100427541-2	chr15	100427093	100427990	+	6.615	Flag-3_Peaks|H2A2_Peaks	non-coding (NR_040351, exon 3 of 3)	non-coding (NR_040351, exon 3 of 3)	4348	NR_040351	432982	Mm.234608	NM_001034883	ENSMUSG00000087444	Gm5475	EG432982	predicted gene 5475	ncRNA	chr15:100427093-100427990	1.0631	0.594786	6.52	7.8	6.67	6.8	8.29	7.29							chr15-5745	chr15-22961
Merged-chr19-60912058-2	chr19	60911662	60912455	+	6.53	CONTROL-1_Peaks|Flag-3_Peaks	intron (NM_018869, intron 1 of 15)	Lx4B|LINE|L1	22309	NM_018869	14773	Mm.279400	NM_018869	ENSMUSG00000003228	Grk5	Gprk5	G protein-coupled receptor kinase 5	protein-coding	chr19:60911662-60912455	1.06148	0.243499	8.33	6.69	7.72	6.43	9.16	3.86	chr19-11718						chr19-710
Merged-chr9-44903653-6	chr9	44902311	44905042	+	17.0833	CONTROL-1_Peaks|CONTROL-2_Peaks|CP27-1_Peaks|CP27-2_Peaks|Flag-3_Peaks|H2A2_Peaks	Intergenic	Intergenic	17066	NM_013795	27425	Mm.14663	NM_013795	ENSMUSG00000038717	Atp5l	4933437C06Rik|Atp5mg	ATP synthase, H+ transporting, mitochondrial F0 complex, subunit G	protein-coding	chr9:44902311-44905042	1.06116	0.232983	29.33	28.62	27.02	27.59	23.11	34.29	chr9-6007	chr9-8226		chr9-9500	chr9-11976		chr9-203	chr9-12791
Merged-chr6-89754859-3	chr6	89754506	89755168	+	5.95333	CP27-2_Peaks|Flag-3_Peaks|H2A2_Peaks	Intergenic	RLTR1B-int|LTR|ERV1	13949	NM_053230	113857	Mm.377154	NM_053230	ENSMUSG00000094586	Vmn1r41	V1ra12|V1rb9	vomeronasal 1 receptor 41	protein-coding	chr6:89754506-89755168	1.06053	0.914613	8.33	4.46	5.26	6.8	7.41	9					chr6-17809		chr6-2354	chr6-24615
Merged-chr11-58302382-6	chr11	58300308	58304391	+	110.035	CONTROL-1_Peaks|CONTROL-2_Peaks|CP27-1_Peaks|CP27-2_Peaks|Flag-3_Peaks|H2A2_Peaks	Intergenic	Intergenic	-4720	NM_182996	103836	Mm.41440	NM_182996	ENSMUSG00000037243	Zfp692	AI746306|AI839920|Zfp692-ps|Znf692	zinc finger protein 692	protein-coding	chr11:58300308-58304391	1.05867	0.58141	145.54	134.53	127.73	136.82	19.19	152.17	chr11-23015	chr11-16317		chr11-13222	chr11-16160		chr11-640	chr11-9841
Merged-chr17-54003886-3	chr17	54003385	54004365	+	8.90667	CP27-2_Peaks|Flag-3_Peaks|H2A2_Peaks	Intergenic	Intergenic	-13244	NM_018751	20888	Mm.10108	NM_018751	ENSMUSG00000023943	Sult1c1	(PST)G|P-SULT|ST1C1|Stp2|Sult1a2|mOLFST	sulfotransferase family, cytosolic, 1C, member 1	protein-coding	chr17:54003385-54004365	1.05584	0.805271	13.03	9.66	10.53	10.96	8.72	16.72					chr17-14791		chr17-4736	chr17-12259
Merged-chr4-89510921-2	chr4	89509865	89511817	+	18.82	CONTROL-1_Peaks|Flag-3_Peaks	intron (NR_132431, intron 7 of 9)	intron (NR_132431, intron 7 of 9)	-177357	NM_175647	242523	Mm.130167	NM_175647	ENSMUSG00000043753	Dmrta1	Dmrt4	doublesex and mab-3 related transcription factor like family A1	protein-coding	chr4:89509865-89511817	1.0557	0.527904	31.14	30.84	27.72	30.99	16.14	27.01	chr4-19278						chr4-3676
Merged-chr4-120188532-6	chr4	120187045	120190082	+	27.6233	CONTROL-2_Peaks|CP27-1_Peaks|CP27-2_Peaks|Flag-3_Peaks|H2A2_Peaks	Intergenic	Intergenic	27357	NM_007902	13615	Mm.284855	NM_007902	ENSMUSG00000028635	Edn2	ET-2|PPET2|VIC	endothelin 2	protein-coding	chr4:120187045-120190082	1.05244	0.178199	68.07	63.18	63.86	60.85	22.68	70.73		chr4-11773,chr4-28432		chr4-24295	chr4-6926		chr4-7398	chr4-24045
Merged-chr4-101647323-6	chr4	101645757	101649297	+	133.163	CONTROL-1_Peaks|CONTROL-2_Peaks|CP27-1_Peaks|CP27-2_Peaks|Flag-3_Peaks|H2A2_Peaks	promoter-TSS (NM_175036)	promoter-TSS (NM_175036)	-256	NM_175036	230514	Mm.4756	NM_175036	ENSMUSG00000035212	Leprot	LEPR|OB-RGRP|Obrgrp|VPS55	leptin receptor overlapping transcript	protein-coding	chr4:101645757-101649297	1.05147	0.175841	171.61	164.26	161.06	158.37	23.55	197.61	chr4-9175	chr4-13898		chr4-13193	chr4-5933		chr4-2264	chr4-8912
Merged-chr4-62558406-2	chr4	62557955	62558857	+	7.05	CP27-2_Peaks|Flag-3_Peaks	Intergenic	Intergenic	-1441	NM_019492	50780	Mm.286753	NM_019492	ENSMUSG00000059810	Rgs3	4930506N09Rik|C2PA-RGS3|C2pa|PDZ-RGS3|RGS3S	regulator of G-protein signaling 3	protein-coding	chr4:62557955-62558857	1.05108	0.940949	7.97	5.2	4.21	8.32	6.54	5.14					chr4-19367		chr4-4896
Merged-chr12-112796829-2	chr12	112796374	112797284	+	6.415	Flag-3_Peaks|H2A2_Peaks	Intergenic	Intergenic	-12146	NM_145450	217887	Mm.186678	NM_145450	ENSMUSG00000037594	Clba1	AW050009|C130001I08Rik|Flj20080	clathrin binding box of aftiphilin containing 1	protein-coding	chr12:112796374-112797284	1.04914	0.713474	3.98	5.2	4.21	4.54	8.72	10.29							chr12-329	chr12-11569
Merged-chr5-32117113-6	chr5	32116601	32117777	+	24.5733	CONTROL-1_Peaks|CONTROL-2_Peaks|CP27-1_Peaks|CP27-2_Peaks|Flag-3_Peaks|H2A2_Peaks	Intergenic	Intergenic	-19283	NM_008037	14284	Mm.24684	NM_008037	ENSMUSG00000029135	Fosl2	Fra-2	fos-like antigen 2	protein-coding	chr5:32116601-32117777	1.0482	0.650883	31.86	36.42	27.72	37.42	7.85	23.15	chr5-10985	chr5-4912		chr5-5410	chr5-8745		chr5-1627	chr5-10936
Merged-chr10-39369892-6	chr10	39368557	39371312	+	77.38	CONTROL-1_Peaks|CONTROL-2_Peaks|CP27-1_Peaks|CP27-2_Peaks|Flag-3_Peaks|H2A2_Peaks	5' UTR (NM_001122892, exon 1 of 13)	5' UTR (NM_001122892, exon 1 of 13)	135	NM_001122893	14360	Mm.4848	NM_008054	ENSMUSG00000019843	Fyn	AI448320|AW552119	Fyn proto-oncogene	protein-coding	chr10:39368557-39371312	1.04798	0.203192	101.37	102.2	98.25	96	15.26	100.73	chr10-10656	chr10-12187		chr10-3894	chr10-14603		chr10-366	chr10-18355
Merged-chr15-99098222-7	chr15	99096023	99100265	+	62.9914	CONTROL-1_Peaks|CONTROL-2_Peaks|CP27-1_Peaks|CP27-2_Peaks|Flag-3_Peaks|H2A2_Peaks	Intergenic	CpG	-1340	NM_176835	72778	Mm.30544	NM_176835	ENSMUSG00000038009	Dnajc22	2810451A06Rik|AI506245	DnaJ heat shock protein family (Hsp40) member C22	protein-coding	chr15:99096023-99100265	1.04771	0.269141	94.86	111.12	92.28	104.32	30.09	117.45	chr15-8603	chr15-8574		chr15-8556	chr15-21186,chr15-5376		chr15-532	chr15-48867
Merged-chr15-5737937-2	chr15	5737588	5738223	+	7.87	CP27-1_Peaks|Flag-3_Peaks	Intergenic	L1Md_F|LINE|L1	241587	NR_045274	71432	Mm.291087	NR_045274	ENSMUSG00000110018	5430437J10Rik	-	RIKEN cDNA 5430437J10 gene	ncRNA	chr15:5737588-5738223	1.04525	0.936656	4.71	8.92	7.37	5.67	8.72	4.72				chr15-15806			chr15-564
Merged-chr7-16047629-6	chr7	16046192	16049619	+	42.0567	CONTROL-1_Peaks|CONTROL-2_Peaks|CP27-1_Peaks|CP27-2_Peaks|Flag-3_Peaks|H2A2_Peaks	Intergenic	CpG	-23940	NM_001347559	666528	Mm.290718	NM_001099277	ENSMUSG00000078796	Zfp541	EG666528|Znf541	zinc finger protein 541	protein-coding	chr7:16046192-16049619	1.04424	0.836737	54.67	64.29	61.76	52.16	23.11	51.01	chr7-12757	chr7-17501		chr7-11004	chr7-10121		chr7-974	chr7-18797
Merged-chr15-86185552-6	chr15	86183867	86187352	+	128.157	CONTROL-1_Peaks|CONTROL-2_Peaks|CP27-1_Peaks|CP27-2_Peaks|Flag-3_Peaks|H2A2_Peaks	promoter-TSS (NR_155352)	promoter-TSS (NR_155352)	-119	NR_155352	102638208	Mm.415090	NR_155352	ENSMUSG00000086424	Gm15569	-	predicted gene 15569	ncRNA	chr15:86183867-86187352	1.04382	0.0677579	169.44	165	163.17	157.23	24.42	170.61	chr15-10957	chr15-13173		chr15-4758	chr15-5568		chr15-5288	chr15-18942
Merged-chr17-3702009-4	chr17	3701586	3702471	+	6.8575	CONTROL-1_Peaks|CONTROL-2_Peaks|CP27-2_Peaks|Flag-3_Peaks	Intergenic	Intergenic	-5767	NM_198958	224480	Mm.328756	NM_198958	ENSMUSG00000023802	Nox3	GP91-3|het|nmf250	NADPH oxidase 3	protein-coding	chr17:3701586-3702471	1.04303	0.918417	9.78	7.43	6.67	9.83	10.47	8.57	chr17-24782	chr17-18812			chr17-11943		chr17-623
Merged-chr19-8713827-6	chr19	8712952	8714706	+	36.2917	CONTROL-1_Peaks|CONTROL-2_Peaks|CP27-1_Peaks|CP27-2_Peaks|Flag-3_Peaks|H2A2_Peaks	promoter-TSS (NM_008577)	promoter-TSS (NM_008577)	68	NM_008577	17254	Mm.4114	NM_008577	ENSMUSG00000010095	Slc3a2	4F2|4F2HC|AI314110|Cd98|Ly-10|Ly-m10|Ly10|Mdu1|Mgp-2hc|NACAE	solute carrier family 3 (activators of dibasic and neutral amino acid transport), member 2	protein-coding	chr19:8712952-8714706	1.04262	0.84386	39.1	61.69	45.27	51.4	12.21	49.3	chr19-6601	chr19-4410		chr19-3516	chr19-2494		chr19-106	chr19-5269
Merged-chr5-120746918-2	chr5	120746201	120748328	+	15.725	CONTROL-1_Peaks|Flag-3_Peaks	intron (NM_001347448, intron 2 of 11)	intron (NM_001347448, intron 2 of 11)	2584	NM_145227	246728	Mm.260926	NM_145227	ENSMUSG00000032690	Oas2	Oasl11	2'-5' oligoadenylate synthetase 2	protein-coding	chr5:120746201-120748328	1.0413	0.797959	13.4	9.29	11.58	10.21	25.29	9.43	chr5-27126						chr5-1273
Merged-chr15-75865619-2	chr15	75865121	75866118	+	6.245	CONTROL-2_Peaks|Flag-3_Peaks	intron (NM_026960, intron 5 of 10)	intron (NM_026960, intron 5 of 10)	3280	NM_026960	69146	Mm.27385	NM_026960	ENSMUSG00000022575	Gsdmd	1810036L03Rik|AW558049|DF5L|Dfna5l|Gsdmdc1|M2-4	gasdermin D	protein-coding	chr15:75865121-75866118	1.03887	0.905804	6.15	8.55	7.72	6.43	9.16	8.14		chr15-29844					chr15-2593
Merged-chr17-25797175-6	chr17	25795638	25798823	+	109.785	CONTROL-1_Peaks|CONTROL-2_Peaks|CP27-1_Peaks|CP27-2_Peaks|Flag-3_Peaks|H2A2_Peaks	promoter-TSS (NM_133719)	promoter-TSS (NM_133719)	-185	NM_133719	70083	Mm.41925	NM_133719	ENSMUSG00000002274	Metrn	1810034B16Rik|EyeLinc16|Hyrac	meteorin, glial cell differentiation regulator	protein-coding	chr17:25795638-25798823	1.03833	0.110102	141.92	144.93	137.55	138.71	19.62	152.17	chr17-25631	chr17-17618		chr17-5513	chr17-8914		chr17-3821	chr17-6788
Merged-chr5-75153626-13	chr5	75149614	75157231	+	31.7446	CONTROL-1_Peaks|CONTROL-2_Peaks|CP27-1_Peaks|CP27-2_Peaks|Flag-3_Peaks|H2A2_Peaks	5' UTR (NM_001347719, exon 1 of 16)	5' UTR (NM_001347719, exon 1 of 16)	486	NM_001347719	18595	Mm.221403	NM_011058	ENSMUSG00000029231	Pdgfra	AI115593|CD140a|Pdgfr-2	platelet derived growth factor receptor, alpha polypeptide	protein-coding	chr5:75149614-75157231	1.0364	0.188787	103.91	101.08	101.41	96.38	39.25	146.6	chr5-12278,chr5-21370	chr5-15958,chr5-24735		chr5-18497,chr5-15471,chr5-5437,chr5-11811	chr5-18284,chr5-16532		chr5-1900	chr5-18790,chr5-6848
Merged-chr17-81387878-3	chr17	81386900	81388615	+	12.9333	CONTROL-1_Peaks|CONTROL-2_Peaks|Flag-3_Peaks	non-coding (NR_104580, exon 9 of 9)	non-coding (NR_104580, exon 9 of 9)	-322672	NM_028138	72167	Mm.273257	NM_028138	ENSMUSG00000024246	Thumpd2	2810025A12Rik	THUMP domain containing 2	protein-coding	chr17:81386900-81388615	1.03599	0.838506	19.55	16.72	16.49	18.52	17.88	18	chr17-21763	chr17-22963					chr17-5479
Merged-chr15-98895755-7	chr15	98894596	98896811	+	18.8857	CONTROL-1_Peaks|CONTROL-2_Peaks|CP27-1_Peaks|CP27-2_Peaks|Flag-3_Peaks|H2A2_Peaks	intron (NM_007857, intron 1 of 2)	intron (NM_007857, intron 1 of 2)	2837	NM_007857	13363	Mm.324688	NM_007857	ENSMUSG00000023000	Dhh	C78960	desert hedgehog	protein-coding	chr15:98894596-98896811	1.0329	0.617218	30.77	32.33	31.23	29.86	23.11	45.44	chr15-28515	chr15-26860		chr15-7727	chr15-12533		chr15-309,chr15-929	chr15-6810
Merged-chr15-80278823-4	chr15	80278232	80279755	+	13.095	CONTROL-2_Peaks|CP27-1_Peaks|CP27-2_Peaks|Flag-3_Peaks	Intergenic	(TG)n|Simple_repeat|Simple_repeat	-8245	NM_001044308	239556	Mm.291058	NM_001044308	ENSMUSG00000022416	Cacna1i	Ca(V)3.3	calcium channel, voltage-dependent, alpha 1I subunit	protein-coding	chr15:80278232-80279755	1.03123	0.918953	18.1	24.16	22.46	18.52	12.21	20.15		chr15-8888		chr15-9427	chr15-12360		chr15-5036
Merged-chr15-94232300-2	chr15	94231804	94232796	+	5.89	CP27-2_Peaks|Flag-3_Peaks	Intergenic	Intergenic	-14902	NR_045629	328594	Mm.135523	NR_045629		D630010B17Rik	Gm811	RIKEN cDNA D630010B17 gene	ncRNA	chr15:94231804-94232796	1.0308	0.923073	5.43	5.95	3.86	7.18	6.54	5.57					chr15-28934		chr15-5542
Merged-chr15-74589344-6	chr15	74588388	74590272	+	27.495	CONTROL-1_Peaks|CONTROL-2_Peaks|CP27-1_Peaks|CP27-2_Peaks|Flag-3_Peaks|H2A2_Peaks	3' UTR (NM_001359759, exon 31 of 31)	3' UTR (NM_001359759, exon 31 of 31)	46988	NM_001177437	69439	Mm.263708	NM_001177437	ENSMUSG00000022603	Mroh4	1700016M24Rik	maestro heat-like repeat family member 4	protein-coding	chr15:74588388-74590272	1.03058	0.58628	34.76	35.68	35.09	33.26	15.7	41.58	chr15-12835	chr15-16101		chr15-12898	chr15-20523		chr15-4756	chr15-10657
Merged-chr17-45573802-6	chr17	45572344	45575278	+	96.5467	CONTROL-1_Peaks|CONTROL-2_Peaks|CP27-1_Peaks|CP27-2_Peaks|Flag-3_Peaks|H2A2_Peaks	promoter-TSS (NM_008302)	promoter-TSS (NM_008302)	-550	NM_008302	15516	Mm.2180	NM_008302	ENSMUSG00000023944	Hsp90ab1	90kDa|AL022974|C81438|Hsp84|Hsp84-1|Hsp90|Hspcb	heat shock protein 90 alpha (cytosolic), class B member 1	protein-coding	chr17:45572344-45575278	1.02976	0.849778	115.49	137.13	127.02	118.3	19.62	115.31	chr17-12392	chr17-11848		chr17-18544	chr17-18183		chr17-2475	chr17-23241
Merged-chr17-23546862-6	chr17	23545565	23547911	+	101.287	CONTROL-1_Peaks|CONTROL-2_Peaks|CP27-1_Peaks|CP27-2_Peaks|Flag-3_Peaks|H2A2_Peaks	Intergenic	CpG	-4061	NR_126485	320020	Mm.445111	NR_126484	ENSMUSG00000117322	6330415G19Rik	-	RIKEN cDNA 6330415G19 gene	ncRNA	chr17:23545565-23547911	1.02815	0.088099	132.87	129.33	128.78	126.24	23.11	165.89	chr17-5681	chr17-6032		chr17-16129	chr17-10583		chr17-243	chr17-12968
Merged-chr11-101260604-6	chr11	101259524	101261502	+	31.49	CONTROL-1_Peaks|CONTROL-2_Peaks|CP27-1_Peaks|CP27-2_Peaks|Flag-3_Peaks|H2A2_Peaks	promoter-TSS (NM_175638)	promoter-TSS (NM_175638)	-54	NM_175638	69847	Mm.23656	NM_175638	ENSMUSG00000035112	Wnk4	2010002J11Rik|Pha2b|Prkwnk4	WNK lysine deficient protein kinase 4	protein-coding	chr11:101259524-101261502	1.02804	0.51632	43.45	40.14	43.51	37.8	12.65	46.3	chr11-18410	chr11-11508		chr11-13507	chr11-19154		chr11-1104	chr11-14742
Merged-chr17-46681004-6	chr17	46679853	46682021	+	67.485	CONTROL-1_Peaks|CONTROL-2_Peaks|CP27-1_Peaks|CP27-2_Peaks|Flag-3_Peaks|H2A2_Peaks	promoter-TSS (NM_010787)	promoter-TSS (NM_010787)	-7	NM_027910	71765	Mm.254784	NM_027910	ENSMUSG00000063576	Klhdc3	1300011D16Rik|Peas	kelch domain containing 3	protein-coding	chr17:46679853-46682021	1.02479	0.162765	85.44	86.96	82.81	85.42	16.14	88.3	chr17-18867	chr17-17995		chr17-8548	chr17-6442		chr17-4510	chr17-10773
Merged-chr7-68320024-6	chr7	68318523	68321303	+	62.985	CONTROL-1_Peaks|CONTROL-2_Peaks|CP27-1_Peaks|CP27-2_Peaks|Flag-3_Peaks|H2A2_Peaks	intron (NM_001013811, intron 3 of 8)	intron (NM_001013811, intron 3 of 8)	-43319	NR_040340	100504026	Mm.426764	NR_040340	ENSMUSG00000086628	Gm16157	-	predicted gene 16157	ncRNA	chr7:68318523-68321303	1.02308	0.429553	80.38	88.08	80	84.66	14.39	90.88	chr7-10641	chr7-10644		chr7-11216	chr7-10310		chr7-1374	chr7-21142
Merged-chr5-31179978-6	chr5	31178959	31181138	+	65.8017	CONTROL-1_Peaks|CONTROL-2_Peaks|CP27-1_Peaks|CP27-2_Peaks|Flag-3_Peaks|H2A2_Peaks	promoter-TSS (NM_027901)	promoter-TSS (NM_027901)	96	NM_027901	71752	Mm.271923	NM_027901	ENSMUSG00000106864	Gtf3c2	1300004C11Rik|2610510G03Rik|AI225816|AU041069|TFIIIC110|mKIAA0011	general transcription factor IIIC, polypeptide 2, beta	protein-coding	chr5:31178959-31181138	1.01863	0.84256	80.74	86.59	85.27	79	15.7	99.45	chr5-4619	chr5-14624		chr5-3365	chr5-7951		chr5-1621	chr5-16858
Merged-chr2-32694221-6	chr2	32693165	32695253	+	67.9783	CONTROL-1_Peaks|CONTROL-2_Peaks|CP27-1_Peaks|CP27-2_Peaks|Flag-3_Peaks|H2A2_Peaks	promoter-TSS (NM_010236)	promoter-TSS (NM_010236)	-34	NM_010236	14287	Mm.3830	NM_010236	ENSMUSG00000009566	Fpgs	AA408187	folylpolyglutamyl synthetase	protein-coding	chr2:32693165-32695253	1.01738	0.882907	76.75	94.76	83.16	85.42	11.77	84.87	chr2-19136	chr2-22165		chr2-11237	chr2-19556		chr2-7088	chr2-11506
Merged-chr17-14629612-3	chr17	14629087	14630260	+	8.05667	CONTROL-2_Peaks|Flag-3_Peaks|H2A2_Peaks	Intergenic	Lx4A|LINE|L1	64589	NM_011581	21826	Mm.26688	NM_011581	ENSMUSG00000023885	Thbs2	TSP2|Thbs-2	thrombospondin 2	protein-coding	chr17:14629087-14630260	1.01685	0.884359	13.03	14.12	11.58	15.12	13.52	12.86		chr17-13822					chr17-1104	chr17-19824
Merged-chr7-3703787-5	chr7	3702775	3704782	+	27.984	CONTROL-1_Peaks|CONTROL-2_Peaks|CP27-1_Peaks|CP27-2_Peaks|Flag-3_Peaks	promoter-TSS (NM_029767)	promoter-TSS (NM_029767)	-263	NM_029767	76846	Mm.13944	NM_029767	ENSMUSG00000006333	Rps9	3010033P07Rik|AL022771|AL022885	ribosomal protein S9	protein-coding	chr7:3702775-3704782	1.01606	0.5	34.39	40.88	34.39	39.69	14.83	36.86	chr7-11465	chr7-16238		chr7-18663	chr7-18484		chr7-409
Merged-chr5-142556068-2	chr5	142555742	142556395	+	6.255	CP27-1_Peaks|Flag-3_Peaks	Intergenic	RLTR28|LTR|ERVL	-4970	NM_001289588	231858	Mm.33766	NM_178702	ENSMUSG00000029576	Radil	AI536456|D930005D10Rik	Ras association and DIL domains	protein-coding	chr5:142555742-142556395	1.01456	0.950748	6.88	7.06	8.07	5.67	6.54	7.72				chr5-21593			chr5-1421
Merged-chr10-66843400-5	chr10	66842176	66844212	+	12.118	CONTROL-1_Peaks|CONTROL-2_Peaks|CP27-1_Peaks|CP27-2_Peaks|Flag-3_Peaks	Intergenic	Intergenic	77190	NR_138560	68488	Mm.338835	NR_138560		1110002J07Rik	-	RIKEN cDNA 1110002J07 gene	ncRNA	chr10:66842176-66844212	1.01222	0.931883	24.26	23.78	26.67	20.79	14.83	25.72	chr10-13888	chr10-14211		chr10-21154	chr10-12364		chr10-406
Merged-chr1-182066982-2	chr1	182066592	182067373	+	7.525	CP27-1_Peaks|Flag-3_Peaks	Intergenic	Arthur1|DNA|hAT-Tip100	-47002	NM_001083120	13800	Mm.87759	NM_008680	ENSMUSG00000022995	Enah	Mena|NDPP-1|Ndpp1|WBP8	ENAH actin regulator	protein-coding	chr1:182066592-182067373	1.01057	0.752789	9.78	7.43	9.47	7.56	8.29	5.57				chr1-17422			chr1-7560
Merged-chr5-30007845-2	chr5	30007554	30008136	+	6.635	Flag-3_Peaks|H2A2_Peaks	Intergenic	Intergenic	-5269	NM_001314054	16193	Mm.1019	NM_031168	ENSMUSG00000025746	Il6	Il-6	interleukin 6	protein-coding	chr5:30007554-30008136	1.01034	0.754801	8.33	6.32	8.07	6.43	7.85	8.57							chr5-630	chr5-19465
Merged-chr1-87625199-2	chr1	87624829	87625569	+	6.615	CONTROL-2_Peaks|Flag-3_Peaks	intron (NR_122078, intron 1 of 27)	L1MB7|LINE|L1	4887	NM_010566	16331	Mm.15105	NM_010566	ENSMUSG00000026288	Inpp5d	SHIP|SHIP-1|SHIP1|SIP-145|p150Ship|s-SHIP	inositol polyphosphate-5-phosphatase D	protein-coding	chr1:87624829-87625569	1.01029	0.977408	3.98	7.8	5.61	6.05	8.72	3.86		chr1-29468					chr1-7016
Merged-chr4-128712138-6	chr4	128711023	128713254	+	82.3717	CONTROL-1_Peaks|CONTROL-2_Peaks|CP27-1_Peaks|CP27-2_Peaks|Flag-3_Peaks|H2A2_Peaks	exon (NM_018774, exon 7 of 15)	exon (NM_018774, exon 7 of 15)	-15433	NM_001195083	54383	Mm.473738	NM_018774	ENSMUSG00000028796	Phc2	A3galt2|AA415044|D130050K19Rik|D4Ertd810e|Edr2|Mph2|p36	polyhomeotic 2	protein-coding	chr4:128711023-128713254	1.00865	0.438187	95.58	101.45	94.04	101.3	14.83	130.74	chr4-8520	chr4-25341		chr4-6688	chr4-8280		chr4-7780	chr4-12965
Merged-chr2-179977008-6	chr2	179976142	179978038	+	52.1133	CONTROL-1_Peaks|CONTROL-2_Peaks|CP27-1_Peaks|CP27-2_Peaks|Flag-3_Peaks|H2A2_Peaks	promoter-TSS (NM_001081092)	promoter-TSS (NM_001081092)	237	NR_033782	66730	Mm.31773	NR_033782	ENSMUSG00000085704	4921531C22Rik	-	RIKEN cDNA 4921531C22 gene	ncRNA	chr2:179976142-179978038	1.00769	0.962229	58.29	68.75	65.97	60.1	11.34	72.44	chr2-14474	chr2-8771		chr2-5751	chr2-8671		chr2-6395	chr2-25458
Merged-chr15-8569391-6	chr15	8568518	8570367	+	37.485	CONTROL-1_Peaks|CONTROL-2_Peaks|CP27-1_Peaks|CP27-2_Peaks|Flag-3_Peaks|H2A2_Peaks	Intergenic	CpG	-124979	NM_201232	71175	Mm.240329	NM_027707	ENSMUSG00000022141	Nipbl	Idn3	NIPBL cohesin loading factor	protein-coding	chr15:8568518-8570367	1.00722	0.886257	48.51	44.97	46.32	46.49	10.03	57.44	chr15-4565	chr15-7246		chr15-5338	chr15-5850		chr15-997	chr15-11660
Merged-chr8-119686097-6	chr8	119684025	119687768	+	38.4167	CONTROL-1_Peaks|CONTROL-2_Peaks|CP27-1_Peaks|CP27-2_Peaks|Flag-3_Peaks|H2A2_Peaks	intron (NM_023395, intron 5 of 6)	intron (NM_023395, intron 5 of 6)	-14113	NM_026922	69047	Mm.46251	NM_026922	ENSMUSG00000034112	Atp2c2	1810010G06Rik|Spca2|mKIAA0703	ATPase, Ca++ transporting, type 2C, member 2	protein-coding	chr8:119684025-119687768	1.0069	0.980512	53.58	39.76	42.81	49.89	37.94	66.44	chr8-8684	chr8-6334		chr8-10712	chr8-6305		chr8-7	chr8-6707
Merged-chr17-87613725-6	chr17	87612484	87614948	+	86.9233	CONTROL-1_Peaks|CONTROL-2_Peaks|CP27-1_Peaks|CP27-2_Peaks|Flag-3_Peaks|H2A2_Peaks	Intergenic	Intergenic	-22263	NM_008532	17075	Mm.4259	NM_008532	ENSMUSG00000045394	Epcam	CD326|EGP|EGP-2|Egp314|Ep-CAM|EpCAM1|GA733-2|Ly74|TROP1|Tacsd1|Tacstd1|gp40	epithelial cell adhesion molecule	protein-coding	chr17:87612484-87614948	1.00538	0.819454	102.1	114.83	103.51	112.26	15.26	120.45	chr17-4691	chr17-5283		chr17-5986	chr17-7649		chr17-5678	chr17-10914
Merged-chr15-69079569-4	chr15	69078926	69080049	+	9.3025	CONTROL-2_Peaks|CP27-2_Peaks|Flag-3_Peaks|H2A2_Peaks	intron (NM_010158, intron 7 of 8)	MTEa|LTR|ERVL-MaLR	151067	NM_010158	13992	Mm.17964	NM_010158	ENSMUSG00000022332	Khdrbs3	Etle|SLM-2|Salp|Slm2|T-STAR	KH domain containing, RNA binding, signal transduction associated 3	protein-coding	chr15:69078926-69080049	1.00313	0.985534	13.03	12.64	11.23	14.36	11.77	16.29		chr15-23271			chr15-27816		chr15-4587	chr15-13958
Merged-chr15-102275732-2	chr15	102275432	102276032	+	6.485	CP27-2_Peaks|Flag-3_Peaks	Intergenic	B3|SINE|B2	-3724	NM_134100	106073	Mm.287740	NM_134100	ENSMUSG00000045665	Mfsd5	AA409375|AW556797|D15Mgi27	major facilitator superfamily domain containing 5	protein-coding	chr15:102275432-102276032	1.00182	0.947071	4.34	6.69	4.21	6.8	7.41	2.14					chr15-24795		chr15-3125
Merged-chr15-62376137-2	chr15	62375882	62376392	+	6.27	CP27-2_Peaks|Flag-3_Peaks	Intergenic	Intergenic	-156686	NR_003523	67552	Mm.484027	NM_026230		H2afy3	4933432H23Rik	H2A histone family, member Y3	pseudo	chr15:62375882-62376392	1.00176	0.992683	5.79	5.57	4.91	6.43	6.54	5.14					chr15-23349		chr15-2361
Merged-chr11-96978583-10	chr11	96975567	96980760	+	43.244	CONTROL-1_Peaks|CONTROL-2_Peaks|CP27-1_Peaks|CP27-2_Peaks|Flag-3_Peaks|H2A2_Peaks	promoter-TSS (NM_030220)	promoter-TSS (NM_030220)	-475	NM_001080964	78912	Mm.491183	NM_030220	ENSMUSG00000018678	Sp2	4930480I16Rik|mKIAA0048	Sp2 transcription factor	protein-coding	chr11:96975567-96980760	1.00162	0.984913	93.41	104.43	100	97.52	29.65	107.59	chr11-19461,chr11-22078	chr11-12486		chr11-20734,chr11-20732	chr11-22728,chr11-14746		chr11-1737	chr11-17173,chr11-16124
Merged-chr15-73505226-2	chr15	73504860	73505592	+	5.49	Flag-3_Peaks|H2A2_Peaks	Intergenic	Intergenic	-7334	NR_152151	105841	Mm.322557	NM_001081066	ENSMUSG00000036661	Dennd3	AI447457|E030003N15Rik	DENN/MADD domain containing 3	protein-coding	chr15:73504860-73505592	0.998634	0.997314	4.34	2.97	3.16	4.16	6.54	8.14							chr15-4695	chr15-47508
Merged-chr17-29347709-6	chr17	29346486	29349414	+	75.64	CONTROL-1_Peaks|CONTROL-2_Peaks|CP27-1_Peaks|CP27-2_Peaks|Flag-3_Peaks|H2A2_Peaks	promoter-TSS (NM_001347335)	promoter-TSS (NM_001347335)	-18	NM_001347335	56462	Mm.3224	NM_019880	ENSMUSG00000024012	Mtch1	2310034O17Rik|AI255158|AU018396|C77849|PSAP	mitochondrial carrier 1	protein-coding	chr17:29346486-29349414	0.998176	0.94857	102.1	100.34	100	102.81	18.75	97.31	chr17-6934	chr17-11103		chr17-6061	chr17-5782		chr17-4013	chr17-21384
Merged-chr9-44043572-5	chr9	44042761	44044392	+	13.364	CONTROL-2_Peaks|CP27-1_Peaks|CP27-2_Peaks|Flag-3_Peaks|H2A2_Peaks	intron (NM_009382, intron 1 of 3)	CpG	192	NM_009382	21838	Mm.3951	NM_009382	ENSMUSG00000032011	Thy1	CD90|T25|Thy-1|Thy-1.2|Thy1.1|Thy1.2	thymus cell antigen 1, theta	protein-coding	chr9:44042761-44044392	0.997556	0.976237	16.29	20.44	17.54	19.28	9.59	16.72		chr9-9250		chr9-9491	chr9-8724		chr9-284	chr9-16857
Merged-chr15-80399692-2	chr15	80399313	80400071	+	7.05	CP27-2_Peaks|Flag-3_Peaks	Intergenic	Intergenic	38911	NR_155275	102633578	Mm.397484	NR_155274	ENSMUSG00000115888	Gm31369	-	predicted gene, 31369	ncRNA	chr15:80399313-80400071	0.99601	0.990085	5.79	6.69	4.21	8.32	6.98	6.86					chr15-18254		chr15-5044
Merged-chr17-48253747-2	chr17	48253407	48254185	+	9.79	Flag-3_Peaks|H2A2_Peaks	intron (NM_021407, intron 2 of 3)	MIR3|SINE|MIR	6067	NM_021407	58218	Mm.302438	NM_021407	ENSMUSG00000041754	Trem3	BB134760|TREM-3	triggering receptor expressed on myeloid cells 3	protein-coding	chr17:48253407-48254185	0.99187	0.989331	6.15	4.83	3.51	7.56	13.52	12.43							chr17-546	chr17-20322
Merged-chr19-7081678-6	chr19	7080896	7082193	+	11.1283	CONTROL-1_Peaks|CONTROL-2_Peaks|CP27-1_Peaks|CP27-2_Peaks|Flag-3_Peaks|H2A2_Peaks	intron (NM_134147, intron 3 of 10)	CT-rich|Low_complexity|Low_complexity	24185	NM_201411	396184	Mm.386930	NM_201411	ENSMUSG00000047787	Flrt1	AW742165|D630040I23Rik	fibronectin leucine rich transmembrane protein 1	protein-coding	chr19:7080896-7082193	0.990337	0.866932	21	14.87	20.35	15.87	12.21	19.72	chr19-9333	chr19-10239		chr19-5213	chr19-6676		chr19-278	chr19-8596
Merged-chr7-13009904-6	chr7	13008685	13011410	+	98.3917	CONTROL-1_Peaks|CONTROL-2_Peaks|CP27-1_Peaks|CP27-2_Peaks|Flag-3_Peaks|H2A2_Peaks	promoter-TSS (NM_001360833)	promoter-TSS (NM_001360833)	-195	NM_001360833	232879	Mm.279272	NM_001024699	ENSMUSG00000049600	Zbtb45	BB161562|Gm157|Zfp499	zinc finger and BTB domain containing 45	protein-coding	chr7:13008685-13011410	0.989863	0.856288	120.93	127.1	127.73	122.84	21.8	131.17	chr7-8786	chr7-6505		chr7-10996	chr7-18588		chr7-276	chr7-10324
Merged-chr12-91589329-8	chr12	91587578	91591784	+	40.58	CONTROL-1_Peaks|CONTROL-2_Peaks|CP27-1_Peaks|CP27-2_Peaks|Flag-3_Peaks|H2A2_Peaks	promoter-TSS (NM_031391)	promoter-TSS (NM_031391)	-32	NM_031391	83602	Mm.275728	NM_031391	ENSMUSG00000020962	Gtf2a1	6330549H03Rik|AA536742|AA959775|AW060250|TfIIAa/b|Tfiia1	general transcription factor II A, 1	protein-coding	chr12:91587578-91591784	0.989515	0.913747	68.43	66.52	74.39	61.99	20.93	84.87	chr12-14589	chr12-12522		chr12-9214	chr12-10061,chr12-7641		chr12-531	chr12-9462,chr12-12895
Merged-chr4-120256493-5	chr4	120255978	120257197	+	10.368	CONTROL-1_Peaks|CP27-1_Peaks|CP27-2_Peaks|Flag-3_Peaks|H2A2_Peaks	Intergenic	Intergenic	30674	NM_194060	329934	Mm.277090	NM_194060	ENSMUSG00000052135	Foxo6	-	forkhead box O6	protein-coding	chr4:120255978-120257197	0.989087	0.640584	18.46	15.98	18.95	15.87	10.47	16.72	chr4-11732			chr4-8970	chr4-10733		chr4-4215	chr4-21230
Merged-chr10-81627971-6	chr10	81626696	81629368	+	60.1817	CONTROL-1_Peaks|CONTROL-2_Peaks|CP27-1_Peaks|CP27-2_Peaks|Flag-3_Peaks|H2A2_Peaks	promoter-TSS (NM_001163430)	promoter-TSS (NM_001163430)	-424	NM_181586	50721	Mm.25643	NM_181586	ENSMUSG00000034748	Sirt6	2810449N18Rik|AI043036|Sir2l6	sirtuin 6	protein-coding	chr10:81626696-81629368	0.987937	0.781548	77.12	77.67	80.71	75.97	21.8	79.3	chr10-10863	chr10-4359		chr10-8693	chr10-12541		chr10-1384	chr10-13201
Merged-chr7-70724277-2	chr7	70724020	70724534	+	6.835	CONTROL-2_Peaks|Flag-3_Peaks	Intergenic	Lx9|LINE|L1	-357531	NM_183261	11819	Mm.158143	NM_009697	ENSMUSG00000030551	Nr2f2	2700033K02Rik|9430015G03Rik|ARP-1|Aporp1|COUP-TF2|COUP-TFII|COUPTFB|EAR3|SVP40|Tcfcoup2	nuclear receptor subfamily 2, group F, member 2	protein-coding	chr7:70724020-70724534	0.987478	0.984998	3.98	7.06	7.02	4.16	6.98	3		chr7-21230					chr7-1385
Merged-chr5-122131697-6	chr5	122130687	122132844	+	39.5467	CONTROL-1_Peaks|CONTROL-2_Peaks|CP27-1_Peaks|CP27-2_Peaks|Flag-3_Peaks|H2A2_Peaks	intron (NM_183307, intron 2 of 12)	ID_B1|SINE|B4	3128	NM_001289811	330188	Mm.386907	NM_183307	ENSMUSG00000043036	Ccdc63	4921511C16Rik	coiled-coil domain containing 63	protein-coding	chr5:122130687-122132844	0.986125	0.92776	48.15	52.77	55.09	47.25	15.7	60.44	chr5-24252	chr5-20676		chr5-7847	chr5-6616		chr5-801	chr5-10135
Merged-chr6-14121663-2	chr6	14121206	14122121	+	7.345	CP27-1_Peaks|Flag-3_Peaks	Intergenic	RLTR10D|LTR|ERVK	250094	NR_045995	76311	Mm.367129	NR_045995	ENSMUSG00000097616	1110019D14Rik	-	RIKEN cDNA 1110019D14 gene	ncRNA	chr6:14121206-14122121	0.985372	0.896888	9.41	7.43	8.77	8.32	9.16	6.86				chr6-19330			chr6-88
Merged-chr4-117832167-5	chr4	117831415	117833038	+	15.16	CONTROL-2_Peaks|CP27-1_Peaks|CP27-2_Peaks|Flag-3_Peaks|H2A2_Peaks	Intergenic	Intergenic	-3032	NM_008135	14664	Mm.244549	NM_008135	ENSMUSG00000028542	Slc6a9	Glyt-1|Glyt1	solute carrier family 6 (neurotransmitter transporter, glycine), member 9	protein-coding	chr4:117831415-117833038	0.985168	0.855867	28.96	27.5	31.23	26.08	13.52	24		chr4-9649		chr4-11659	chr4-20736		chr4-873	chr4-10932
Merged-chr15-99219931-2	chr15	99219628	99220234	+	6.95	CP27-1_Peaks|Flag-3_Peaks	Intergenic	Intergenic	-4661	NM_010601	16512	Mm.374793	NM_010601	ENSMUSG00000037579	Kcnh3	AU019351|C030044P22Rik|Elk2|Kv12.2|Melk2	potassium voltage-gated channel, subfamily H (eag-related), member 3	protein-coding	chr15:99219628-99220234	0.98251	0.976015	3.98	5.57	6.32	3.4	9.16	6.43				chr15-30082			chr15-533
Merged-chr5-115489513-6	chr5	115488356	115490515	+	53.0967	CONTROL-1_Peaks|CONTROL-2_Peaks|CP27-1_Peaks|CP27-2_Peaks|Flag-3_Peaks|H2A2_Peaks	Intergenic	Intergenic	-4951	NM_133760	75387	Mm.332616	NM_133760	ENSMUSG00000029524	Sirt4	4930596O17Rik	sirtuin 4	protein-coding	chr5:115488356-115490515	0.981827	0.650989	57.57	66.15	56.84	69.17	13.95	89.16	chr5-10197	chr5-11978		chr5-13617	chr5-16905		chr5-765	chr5-7597
Merged-chr4-124988387-4	chr4	124987006	124989521	+	13.53	CONTROL-1_Peaks|CP27-1_Peaks|CP27-2_Peaks|Flag-3_Peaks	intron (NM_138683, intron 1 of 5)	intron (NM_138683, intron 1 of 5)	1833	NM_138683	192199	Mm.42202	NM_138683	ENSMUSG00000028871	Rspo1	R-spondin|Rspondin	R-spondin 1	protein-coding	chr4:124987006-124989521	0.980855	0.972524	26.07	13.38	17.54	22.68	27.04	24.86	chr4-23842			chr4-21359	chr4-20851		chr4-4306
Merged-chr4-108301486-6	chr4	108300078	108302921	+	70.34	CONTROL-1_Peaks|CONTROL-2_Peaks|CP27-1_Peaks|CP27-2_Peaks|Flag-3_Peaks|H2A2_Peaks	promoter-TSS (NM_001033634)	promoter-TSS (NM_001033634)	-409	NM_001033634	414872	Mm.426241	NM_001033634	ENSMUSG00000034636	Zyg11b	1110046I03Rik|2810482G21Rik|D4Mgi23|Gm431|mKIAA1730	zyg-ll family member B, cell cycle regulator	protein-coding	chr4:108300078-108302921	0.979432	0.667512	92.69	95.88	91.23	101.3	21.37	99.45	chr4-13816	chr4-11092		chr4-7216	chr4-5500		chr4-3976	chr4-17921
Merged-chr6-117566048-2	chr6	117565786	117566310	+	6.245	CONTROL-2_Peaks|Flag-3_Peaks	Intergenic	Intergenic	70813	NR_152214	100126203	Mm.217172	NR_152214		6820426E19Rik	Gm43983	RIKEN cDNA 6820426E19 gene	ncRNA	chr6:117565786-117566310	0.978173	0.161494	6.15	5.95	6.32	6.05	7.41	6.43		chr6-25871					chr6-2557
Merged-chr17-62291376-2	chr17	62290930	62291867	+	8.025	Flag-3_Peaks|H2A2_Peaks	Intergenic	Intergenic	589919	NM_207654	13640	Mm.7978	NM_010109	ENSMUSG00000048915	Efna5	AL-1|AV158822|EFL-5|Ephrin-A5|Epl7|LERK-7|RAGS	ephrin A5	protein-coding	chr17:62290930-62291867	0.975945	0.177171	5.79	5.57	5.97	5.67	10.47	6.86							chr17-4956	chr17-27597
Merged-chr11-53770188-6	chr11	53769070	53771273	+	44.8467	CONTROL-1_Peaks|CONTROL-2_Peaks|CP27-1_Peaks|CP27-2_Peaks|Flag-3_Peaks|H2A2_Peaks	promoter-TSS (NM_001159396)	promoter-TSS (NM_001159396)	157	NM_008390	16362	Mm.105218	NM_008390	ENSMUSG00000018899	Irf1	AU020929|Irf-1	interferon regulatory factor 1	protein-coding	chr11:53769070-53771273	0.975502	0.81261	61.91	52.77	58.6	58.96	17.01	67.73	chr11-16939	chr11-11744		chr11-8767	chr11-7107		chr11-929	chr11-15905
Merged-chr3-139075164-6	chr3	139073716	139076756	+	111.102	CONTROL-1_Peaks|CONTROL-2_Peaks|CP27-1_Peaks|CP27-2_Peaks|Flag-3_Peaks|H2A2_Peaks	promoter-TSS (NM_001286759)	promoter-TSS (NM_001286759)	-35	NM_001356388	229877	Mm.28893	NM_145544	ENSMUSG00000028149	Rap1gds1	BC011279|GDS1	RAP1, GTP-GDP dissociation stimulator 1	protein-coding	chr3:139073716-139076756	0.974773	0.283439	143.73	135.64	145.62	140.98	13.95	144.03	chr3-11744	chr3-12785		chr3-10336	chr3-9900		chr3-1430	chr3-11269
Merged-chr6-86480008-6	chr6	86478047	86481415	+	65.9067	CONTROL-1_Peaks|CONTROL-2_Peaks|CP27-1_Peaks|CP27-2_Peaks|Flag-3_Peaks|H2A2_Peaks	intron (NR_131125, intron 1 of 4)	intron (NR_131125, intron 1 of 4)	1099	NR_131125	320486	Mm.391625	NR_131125	ENSMUSG00000085589	A430078I02Rik	T25621	RIKEN cDNA A430078I02 gene	ncRNA	chr6:86478047-86481415	0.971853	0.192117	90.51	86.96	92.28	90.33	17.44	102.88	chr6-20994	chr6-12254		chr6-20613	chr6-20397		chr6-2318	chr6-4015
Merged-chr11-56335888-2	chr11	56335566	56336328	+	8.05	CP27-1_Peaks|Flag-3_Peaks	Intergenic	Intergenic	-294960	NM_153079	216749	Mm.213205	NM_153079	ENSMUSG00000037393	Nmur2	Nmu2r	neuromedin U receptor 2	protein-coding	chr11:56335566-56336328	0.967337	0.870452	7.6	7.8	9.12	6.8	8.72	6.86				chr11-20042			chr11-739
Merged-chr17-87672445-6	chr17	87670931	87673790	+	107.668	CONTROL-1_Peaks|CONTROL-2_Peaks|CP27-1_Peaks|CP27-2_Peaks|Flag-3_Peaks|H2A2_Peaks	promoter-TSS (NM_008628)	promoter-TSS (NM_008628)	-172	NM_008628	17685	Mm.4619	NM_008628	ENSMUSG00000024151	Msh2	AI788990	mutS homolog 2	protein-coding	chr17:87670931-87673790	0.965854	0.278114	141.2	124.12	148.08	126.62	19.62	157.75	chr17-12002	chr17-20673		chr17-15737	chr17-7973		chr17-5682	chr17-7751
Merged-chr17-31275427-3	chr17	31274982	31276063	+	10.0567	CONTROL-1_Peaks|CONTROL-2_Peaks|Flag-3_Peaks	intron (NM_025290, intron 1 of 8)	ORR1D2|LTR|ERVL-MaLR	1774	NM_001364916	22092	Mm.12743	NM_025290	ENSMUSG00000024033	Rsph1	MCA|Tsga2	radial spoke head 1 homolog (Chlamydomonas)	protein-coding	chr17:31274982-31276063	0.957326	0.73549	9.41	10.78	10.88	10.21	16.57	14.15	chr17-18557	chr17-14040					chr17-194
Merged-chr15-77363250-4	chr15	77362442	77364090	+	20.0475	CONTROL-2_Peaks|CP27-2_Peaks|Flag-3_Peaks|H2A2_Peaks	Intergenic	Intergenic	35844	NM_029419	75761	Mm.232636	NM_029419	ENSMUSG00000010601	Apol7a	9130022K13Rik|Apol3	apolipoprotein L 7a	protein-coding	chr15:77362442-77364090	0.956575	0.785352	28.96	33.82	26.32	39.31	13.08	31.72		chr15-7422			chr15-9377		chr15-1412	chr15-10315
Merged-chr6-42645386-6	chr6	42644160	42646482	+	60.5133	CONTROL-1_Peaks|CONTROL-2_Peaks|CP27-1_Peaks|CP27-2_Peaks|Flag-3_Peaks|H2A2_Peaks	promoter-TSS (NM_146174)	promoter-TSS (NM_146174)	-280	NM_146174	232748	Mm.279659	NM_146174	ENSMUSG00000029851	Tcaf2	Fam115c	TRPM8 channel-associated factor 2	protein-coding	chr6:42644160-42646482	0.955567	0.70187	75.67	73.58	72.28	83.91	16.14	90.02	chr6-8275	chr6-10111		chr6-9000	chr6-8541		chr6-1052	chr6-8274
Merged-chr4-117550216-6	chr4	117548761	117551341	+	99.1067	CONTROL-1_Peaks|CONTROL-2_Peaks|CP27-1_Peaks|CP27-2_Peaks|Flag-3_Peaks|H2A2_Peaks	promoter-TSS (NM_080469)	promoter-TSS (NM_080469)	-273	NM_001356404	140546	Mm.235891	NM_080469	ENSMUSG00000033423	Eri3	PINT1|Prnpip1	exoribonuclease 3	protein-coding	chr4:117548761-117551341	0.954774	0.670924	111.15	126.35	126.67	122.08	18.75	138.46	chr4-15648	chr4-11757		chr4-14360	chr4-16661		chr4-2419	chr4-9727
Merged-chr15-80084034-6	chr15	80082838	80085340	+	61.5017	CONTROL-1_Peaks|CONTROL-2_Peaks|CP27-1_Peaks|CP27-2_Peaks|Flag-3_Peaks|H2A2_Peaks	promoter-TSS (NM_013762)	promoter-TSS (NM_013762)	-683	NM_013762	27367	Mm.290771	NM_013762	ENSMUSG00000060036	Rpl3	F2|J1	ribosomal protein L3	protein-coding	chr15:80082838-80085340	0.954147	0.133673	72.05	80.27	76.49	83.15	12.65	83.16	chr15-8521	chr15-5432		chr15-13001	chr15-6854		chr15-5034	chr15-5900
Merged-chr17-64362556-2	chr17	64362251	64362861	+	6.4	CONTROL-2_Peaks|Flag-3_Peaks	Intergenic	Intergenic	-30673	NM_001025309	224938	Mm.489681	NM_144859	ENSMUSG00000024083	Pja2	AI447901|AL022700|Neurodap1|mKIAA0438	praja ring finger ubiquitin ligase 2	protein-coding	chr17:64362251-64362861	0.953229	0.367287	6.15	6.69	6.67	6.8	6.54	7.29		chr17-22434					chr17-4997
Merged-chr15-74709785-6	chr15	74708234	74711133	+	136.263	CONTROL-1_Peaks|CONTROL-2_Peaks|CP27-1_Peaks|CP27-2_Peaks|Flag-3_Peaks|H2A2_Peaks	promoter-TSS (NM_008415)	promoter-TSS (NM_008415)	-361	NM_008415	16469	Mm.87052	NM_008415	ENSMUSG00000046380	Jrk	-	jerky	protein-coding	chr15:74708234-74711133	0.951479	0.185275	161.84	174.66	172.99	180.67	19.19	178.75	chr15-24642	chr15-26139		chr15-8885	chr15-13281		chr15-2561	chr15-8833
Merged-chr4-94383430-2	chr4	94383168	94383692	+	6.8	CONTROL-2_Peaks|Flag-3_Peaks	Intergenic	Lx2B2|LINE|L1	173366	NM_026368	67770	Mm.35170	NM_026368	ENSMUSG00000028578	Caap1	5830433M19Rik|AI536248|CAAP	caspase activity and apoptosis inhibitor 1	protein-coding	chr4:94383168-94383692	0.950904	0.912269	3.98	7.06	6.32	5.29	6.54	4.29		chr4-24508					chr4-6563
Merged-chr18-35959126-6	chr18	35958063	35959673	+	14.2083	CONTROL-1_Peaks|CONTROL-2_Peaks|CP27-1_Peaks|CP27-2_Peaks|Flag-3_Peaks|H2A2_Peaks	Intergenic	B1F1|SINE|Alu	-5962	NM_001289602	74002	Mm.196944	NM_028707	ENSMUSG00000024347	Psd2	6330404E20Rik|AW125584|EFA6C	pleckstrin and Sec7 domain containing 2	protein-coding	chr18:35958063-35959673	0.950456	0.857824	17.38	21.18	22.81	17.76	12.65	25.72	chr18-2417	chr18-3092		chr18-4481	chr18-6320		chr18-105	chr18-6494
Merged-chr6-121173825-4	chr6	121173444	121174273	+	6.1725	CONTROL-1_Peaks|CONTROL-2_Peaks|CP27-1_Peaks|Flag-3_Peaks	Intergenic	Intergenic	-9809	NR_130903	74043	Mm.491240	NM_028730	ENSMUSG00000067825	Pex26	4632428M11Rik	peroxisomal biogenesis factor 26	protein-coding	chr6:121173444-121174273	0.947147	0.749522	7.97	7.8	9.47	7.18	6.98	4.29	chr6-27603	chr6-25943		chr6-18567			chr6-1275
Merged-chr6-51173590-6	chr6	51171632	51175052	+	45.93	CONTROL-1_Peaks|CONTROL-2_Peaks|CP27-1_Peaks|CP27-2_Peaks|Flag-3_Peaks|H2A2_Peaks	Intergenic	Intergenic	96568	NR_029719	387166		NR_029719	ENSMUSG00000065505	Mir148a	Mirn148|Mirn148a|mir-148a	microRNA 148a	ncRNA	chr6:51171632-51175052	0.9449	0.0256634	59.01	64.29	62.46	68.03	15.7	78.02	chr6-13612	chr6-12966		chr6-13350	chr6-11827		chr6-1091	chr6-18509
Merged-chr17-83861124-9	chr17	83858863	83863412	+	88.7644	CONTROL-1_Peaks|CONTROL-2_Peaks|CP27-1_Peaks|CP27-2_Peaks|Flag-3_Peaks|H2A2_Peaks	Intergenic	B1_Mus2|SINE|Alu	-6719	NR_155491	320021	Mm.379475	NR_155490		C430042M11Rik	-	RIKEN cDNA C430042M11 gene	ncRNA	chr17:83858863-83863412	0.943853	0.661559	183.56	155.34	176.5	182.56	26.6	200.18	chr17-3778,chr17-13464	chr17-6388,chr17-8993		chr17-3568	chr17-3661		chr17-3098	chr17-15814,chr17-4422
Merged-chr4-86050136-2	chr4	86049631	86050858	+	10.605	Flag-3_Peaks|H2A2_Peaks	Intergenic	Intergenic	-3671	NM_029967	77739	Mm.331690	NM_029967	ENSMUSG00000066113	Adamtsl1	5930437A14Rik|6720426B09Rik|ADAMTSL-1	ADAMTS-like 1	protein-coding	chr4:86049631-86050858	0.935864	0.893257	9.78	15.61	15.79	11.34	14.83	17.15							chr4-2137	chr4-20764
Merged-chr6-136804340-5	chr6	136803020	136805593	+	51.28	CONTROL-1_Peaks|CONTROL-2_Peaks|CP27-1_Peaks|CP27-2_Peaks|Flag-3_Peaks	exon (NM_175652, exon 1 of 1)	exon (NM_175652, exon 1 of 1)	125	NM_175652	320332	Mm.246720	NM_175652	ENSMUSG00000096010	Hist4h4	B130044J01Rik	histone cluster 4, H4	protein-coding	chr6:136803020-136805593	0.934412	0.577961	59.38	62.43	69.13	61.23	22.68	60.87	chr6-16405	chr6-11738		chr6-8764	chr6-16316		chr6-2636
Merged-chr3-156561639-6	chr3	156559834	156562976	+	82.7683	CONTROL-1_Peaks|CONTROL-2_Peaks|CP27-1_Peaks|CP27-2_Peaks|Flag-3_Peaks|H2A2_Peaks	promoter-TSS (NM_177274)	promoter-TSS (NM_177274)	282	NR_040398	329782	Mm.183459	NR_040398	ENSMUSG00000085084	4930570G19Rik	C630015G22	RIKEN cDNA 4930570G19 gene	ncRNA	chr3:156559834-156562976	0.933833	0.593436	101.37	95.51	98.95	111.88	18.75	127.74	chr3-24313	chr3-8236		chr3-5109	chr3-13378		chr3-1517	chr3-35138
Merged-chr17-12810623-6	chr17	12810056	12811212	+	21.3817	CONTROL-1_Peaks|CONTROL-2_Peaks|CP27-1_Peaks|CP27-2_Peaks|Flag-3_Peaks|H2A2_Peaks	intron (NR_027784, intron 2 of 2)	intron (NR_027784, intron 2 of 2)	-40928	NM_010515	16004	Mm.26553	NM_010515	ENSMUSG00000023830	Igf2r	AI661837|CD222|CI-MPR|M6P/IGF2R|Mpr300	insulin-like growth factor 2 receptor	protein-coding	chr17:12810056-12811212	0.933287	0.488054	27.15	26.01	30.88	26.08	10.9	28.72	chr17-10840	chr17-6653		chr17-3772	chr17-6790		chr17-1089	chr17-7950
Merged-chr2-181319676-6	chr2	181318631	181320611	+	65.6133	CONTROL-1_Peaks|CONTROL-2_Peaks|CP27-1_Peaks|CP27-2_Peaks|Flag-3_Peaks|H2A2_Peaks	promoter-TSS (NM_001166668)	promoter-TSS (NM_001166668)	-103	NM_001166665	269400	Mm.11333	NM_001001882	ENSMUSG00000038685	Rtel1	AI451565|AW540478|Rtel	regulator of telomere elongation helicase 1	protein-coding	chr2:181318631-181320611	0.92408	0.594786	83.63	69.49	81.41	84.29	16.14	99.02	chr2-20114	chr2-16949		chr2-23274	chr2-20894		chr2-6409	chr2-11406
Merged-chr1-135131704-8	chr1	135129589	135133696	+	25.5887	CONTROL-1_Peaks|CONTROL-2_Peaks|CP27-1_Peaks|CP27-2_Peaks|Flag-3_Peaks|H2A2_Peaks	intron (NR_153383, intron 1 of 36)	intron (NR_153383, intron 1 of 36)	933	NR_153383	13924	Mm.4450	NM_007955		Ptprv	Esp|OST|OST-PTP	protein tyrosine phosphatase, receptor type, V	protein-coding	chr1:135129589-135133696	0.920269	0.615664	54.31	49.8	52.28	60.85	27.47	76.3	chr1-22054,chr1-13380	chr1-21140		chr1-21486,chr1-15028	chr1-13735		chr1-8682	chr1-16580
Merged-chr15-78916639-2	chr15	78915879	78917230	+	15.64	Flag-3_Peaks|H2A2_Peaks	intron (NM_020271, intron 1 of 1)	intron (NM_020271, intron 1 of 1)	2635	NM_020271	57028	Mm.263169	NM_020271	ENSMUSG00000116165	Pdxp	1600027H05Rik|AB041662|PLPP	pyridoxal (pyridoxine, vitamin B6) phosphatase	protein-coding	chr15:78915879-78917230	0.919931	0.100257	13.76	13.01	14.74	14.36	12.21	28.29							chr15-2682	chr15-10016
Merged-chr7-5051451-6	chr7	5050425	5052812	+	98.28	CONTROL-1_Peaks|CONTROL-2_Peaks|CP27-1_Peaks|CP27-2_Peaks|Flag-3_Peaks|H2A2_Peaks	promoter-TSS (NM_026900)	promoter-TSS (NM_026900)	86	NM_026900	68992	Mm.41484	NM_026900	ENSMUSG00000055633	Zfp580	1500015O20Rik|AI838225|Znf580	zinc finger protein 580	protein-coding	chr7:5050425-5052812	0.919276	0.384352	114.41	121.89	131.94	125.11	21.37	124.74	chr7-6834	chr7-9528		chr7-17124	chr7-11242		chr7-934	chr7-11982
Merged-chr6-51384404-6	chr6	51383584	51385209	+	36.8467	CONTROL-1_Peaks|CONTROL-2_Peaks|CP27-1_Peaks|CP27-2_Peaks|Flag-3_Peaks|H2A2_Peaks	intron (NR_110455, intron 1 of 2)	intron (NR_110455, intron 1 of 2)	4686	NR_110455	625167	Mm.389772	NR_110455	ENSMUSG00000107660	Gm6559	EG625167	predicted gene 6559	ncRNA	chr6:51383584-51385209	0.918673	0.297842	42	43.85	47.72	45.73	10.9	63.87	chr6-7929	chr6-13913		chr6-9558	chr6-7398		chr6-2118	chr6-9047
Merged-chr15-99669828-8	chr15	99668041	99671638	+	67.3637	CONTROL-1_Peaks|CONTROL-2_Peaks|CP27-1_Peaks|CP27-2_Peaks|Flag-3_Peaks|H2A2_Peaks	promoter-TSS (NM_009597)	promoter-TSS (NM_009597)	-538	NM_009597	11419	Mm.440107	NM_009597	ENSMUSG00000023017	Asic1	AI843610|ASIC|ASIC1a|Accn2|B530003N02Rik|BNaC2	acid-sensing (proton-gated) ion channel 1	protein-coding	chr15:99668041-99671638	0.918609	0.493327	118.75	98.85	118.95	117.93	23.55	138.03	chr15-37942	chr15-6645		chr15-21954	chr15-24693,chr15-4304		chr15-3068	chr15-9203,chr15-9204
Merged-chr6-113077118-7	chr6	113075951	113078602	+	22.73	CONTROL-1_Peaks|CONTROL-2_Peaks|CP27-1_Peaks|CP27-2_Peaks|Flag-3_Peaks|H2A2_Peaks	promoter-TSS (NM_028385)	promoter-TSS (NM_028385)	-32	NR_027008	14910	Mm.280950	NR_027008	ENSMUSG00000086429	Gt(ROSA)26Sor	AV258896|Gtrgeo26|Gtrosa26|R26|ROSA26|Thumpd3as1	gene trap ROSA 26, Philippe Soriano	ncRNA	chr6:113075951-113078602	0.916602	0.0623692	34.03	36.42	37.55	39.31	14.83	36.44	chr6-16169	chr6-11610		chr6-9204,chr6-14957	chr6-8745		chr6-2520	chr6-20014
Merged-chr15-82611170-2	chr15	82610782	82611558	+	5.95	CONTROL-1_Peaks|Flag-3_Peaks	Intergenic	Intergenic	9737	NM_145474	223706	Mm.436843	NM_145474	ENSMUSG00000094559	Cyp2d34	-	cytochrome P450, family 2, subfamily d, polypeptide 34	protein-coding	chr15:82610782-82611558	0.913867	0.605137	6.52	4.09	6.32	5.29	8.29	5.14	chr15-37029						chr15-2753
Merged-chr15-74687114-3	chr15	74686207	74688264	+	24.5267	CP27-1_Peaks|CP27-2_Peaks|Flag-3_Peaks	Intergenic	Intergenic	-14665	NM_018790	11838	Mm.491310	NM_018790	ENSMUSG00000022602	Arc	Arc3.1|C86064|arg3.1|mArc	activity regulated cytoskeletal-associated protein	protein-coding	chr15:74686207-74688264	0.910739	0.209163	38.38	33.45	40.7	38.17	17.01	24.43				chr15-16760	chr15-10596		chr15-2558
Merged-chr4-128856146-2	chr4	128855676	128856553	+	8.87	CP27-1_Peaks|Flag-3_Peaks	Intergenic	Intergenic	-27930	NM_001370756	67525	Mm.30653	NM_178110	ENSMUSG00000041000	Trim62	6330414G21Rik|AI450348|Dear1	tripartite motif-containing 62	protein-coding	chr4:128855676-128856553	0.90666	0.279054	11.22	7.43	12.63	7.94	8.29	8.57				chr4-9405			chr4-4425
Merged-chr11-115187411-6	chr11	115186201	115188331	+	46.4917	CONTROL-1_Peaks|CONTROL-2_Peaks|CP27-1_Peaks|CP27-2_Peaks|Flag-3_Peaks|H2A2_Peaks	promoter-TSS (NM_001362892)	promoter-TSS (NM_001362892)	133	NM_001362891	66176	Mm.86823	NM_025400	ENSMUSG00000015542	Nat9	1110028N05Rik	N-acetyltransferase 9 (GCN5-related, putative)	protein-coding	chr11:115186201-115188331	0.905351	0.573651	51.41	62.8	64.92	61.23	13.95	56.58	chr11-25948	chr11-12081		chr11-7317	chr11-9047		chr11-1164	chr11-7996
Merged-chr11-101657812-6	chr11	101656833	101658952	+	56.4483	CONTROL-1_Peaks|CONTROL-2_Peaks|CP27-1_Peaks|CP27-2_Peaks|Flag-3_Peaks|H2A2_Peaks	Intergenic	Intergenic	-7649	NM_025404	80981	Mm.266840	NM_025404	ENSMUSG00000034936	Arl4d	1110036H21Rik|ARL6|AW456149|Arf4l|Arfl4|Arl5	ADP-ribosylation factor-like 4D	protein-coding	chr11:101656833-101658952	0.904215	0.428686	66.62	68.75	68.07	81.64	15.7	75.02	chr11-13710	chr11-17645		chr11-20861	chr11-17821		chr11-530	chr11-19028
Merged-chr10-42626764-2	chr10	42626501	42627027	+	5.81	CONTROL-2_Peaks|Flag-3_Peaks	Intergenic	B3|SINE|B2	-43174	NM_152229	21907	Mm.287100	NM_152229	ENSMUSG00000019803	Nr2e1	Mtl1|Mtll|TLL|Tlx|XTLL|fierce|frc|tailless	nuclear receptor subfamily 2, group E, member 1	protein-coding	chr10:42626501-42627027	0.901274	0.888385	2.17	6.32	5.26	4.16	5.67	3.86		chr10-25649					chr10-1120
Merged-chr5-137103040-8	chr5	137101887	137104068	+	22.6887	CONTROL-1_Peaks|CONTROL-2_Peaks|CP27-1_Peaks|CP27-2_Peaks|Flag-3_Peaks|H2A2_Peaks	Intergenic	Intergenic	13230	NM_201373	384309	Mm.100647	NM_201373	ENSMUSG00000043279	Trim56	A130009K11Rik|Gm452|RNF109	tripartite motif-containing 56	protein-coding	chr5:137101887-137104068	0.899932	0.376315	43.81	36.05	45.27	43.47	12.65	43.72	chr5-12567,chr5-13314	chr5-14287,chr5-7949		chr5-10835	chr5-17144		chr5-2449	chr5-15281
Merged-chr10-21994393-3	chr10	21993972	21995050	+	7.27333	CP27-1_Peaks|CP27-2_Peaks|Flag-3_Peaks	promoter-TSS (NM_011361)	promoter-TSS (NM_011361)	-155	NM_011361	20393	Mm.28405	NM_011361	ENSMUSG00000019970	Sgk1	Sgk	serum/glucocorticoid regulated kinase 1	protein-coding	chr10:21993972-21995050	0.899421	0.682281	7.6	4.83	7.02	6.8	11.77	7.72				chr10-16219	chr10-17825		chr10-207
Merged-chr17-83967524-2	chr17	83967218	83967902	+	6.18	Flag-3_Peaks|H2A2_Peaks	Intergenic	Intergenic	-30992	NR_130994	78148	Mm.243918	NR_130994	ENSMUSG00000117431	8430430B14Rik	-	RIKEN cDNA 8430430B14 gene	ncRNA	chr17:83967218-83967902	0.894817	0.145058	5.79	5.95	6.32	6.8	6.54	9.43							chr17-5546	chr17-28365
Merged-chr17-70698906-2	chr17	70698531	70699281	+	6.78	CP27-1_Peaks|Flag-3_Peaks	intron (NM_027712, intron 5 of 9)	intron (NM_027712, intron 5 of 9)	137159	NM_001128181	224997	Mm.311840	NM_027712	ENSMUSG00000003279	Dlgap1	4933422O14Rik|9630002F18|AI845682|AI848168|BB075781|D17Bwg0511e|GKAP/SAPAP|GKPA/SAPAP|Gkap|Sapap1|mKIAA4162	DLG associated protein 1	protein-coding	chr17:70698531-70699281	0.894529	0.677171	6.88	6.69	9.12	6.05	8.29	3.86				chr17-15392			chr17-5187
Merged-chr15-78530283-6	chr15	78528377	78532687	+	88.6467	CONTROL-1_Peaks|CONTROL-2_Peaks|CP27-1_Peaks|CP27-2_Peaks|Flag-3_Peaks|H2A2_Peaks	promoter-TSS (NM_001204153)	promoter-TSS (NM_001204153)	-881	NM_028331	72709	Mm.34776	NM_028331	ENSMUSG00000022440	C1qtnf6	2810036M19Rik|Adiq|CTRP6	C1q and tumor necrosis factor related protein 6	protein-coding	chr15:78528377-78532687	0.89013	0.0272057	109.7	106.29	122.46	120.19	27.47	115.74	chr15-20218	chr15-16178		chr15-4896	chr15-8844		chr15-2669	chr15-10689
Merged-chr5-63953578-6	chr5	63952725	63954354	+	17.8783	CONTROL-1_Peaks|CONTROL-2_Peaks|CP27-1_Peaks|CP27-2_Peaks|Flag-3_Peaks|H2A2_Peaks	intron (NM_145923, intron 1 of 6)	intron (NM_145923, intron 1 of 6)	15358	NM_145923	100532	Mm.243632	NM_145923	ENSMUSG00000047881	Rell1	AA536743	RELT-like 1	protein-coding	chr5:63952725-63954354	0.887745	0.411858	23.53	20.44	24.21	25.32	9.59	32.15	chr5-19433	chr5-8110		chr5-15364	chr5-6518		chr5-1835	chr5-31981
Merged-chr5-122614570-6	chr5	122613484	122615959	+	65.8783	CONTROL-1_Peaks|CONTROL-2_Peaks|CP27-1_Peaks|CP27-2_Peaks|Flag-3_Peaks|H2A2_Peaks	promoter-TSS (NM_001358917)	promoter-TSS (NM_001358917)	-177	NM_009879	12589	Mm.10125	NM_009879	ENSMUSG00000029469	Ift81	AW060663|Cdv-1|Cdv-1r|Cdv1	intraflagellar transport 81	protein-coding	chr5:122613484-122615959	0.887663	0.0105782	83.63	78.04	93.69	88.44	13.08	111.02	chr5-4870	chr5-6783		chr5-7208	chr5-8973		chr5-2287	chr5-9871
Merged-chr6-17202340-6	chr6	17201933	17202740	+	11.5133	CONTROL-1_Peaks|CONTROL-2_Peaks|CP27-1_Peaks|CP27-2_Peaks|Flag-3_Peaks|H2A2_Peaks	intron (NR_102304, intron 2 of 2)	intron (NR_102304, intron 2 of 2)	4229	NR_102304	319682	Mm.136046	NR_102304	ENSMUSG00000085171	D830026I12Rik	-	RIKEN cDNA D830026I12 gene	ncRNA	chr6:17201933-17202740	0.884315	0.437257	19.91	17.47	20.35	21.92	9.59	18.43	chr6-8593	chr6-21225		chr6-4001	chr6-3899		chr6-426	chr6-9245
Merged-chr3-96263555-7	chr3	96261844	96265177	+	46.6829	CONTROL-1_Peaks|CONTROL-2_Peaks|CP27-1_Peaks|CP27-2_Peaks|Flag-3_Peaks|H2A2_Peaks	promoter-TSS (NM_033596)	promoter-TSS (NM_033596)	-193	NM_033596	97122	Mm.227295	NM_033596	ENSMUSG00000091405	Hist2h4	H4|X04652	histone cluster 2, H4	protein-coding	chr3:96261844-96265177	0.882743	0.148565	71.32	72.47	78.6	84.29	20.5	70.73	chr3-23118	chr3-8481		chr3-22444	chr3-5526,chr3-7709		chr3-604	chr3-18659
Merged-chr1-45587701-4	chr1	45587197	45588298	+	6.3875	CONTROL-2_Peaks|CP27-1_Peaks|CP27-2_Peaks|Flag-3_Peaks	Intergenic	Intergenic	-84465	NM_007737	12832	Mm.10299	NM_007737	ENSMUSG00000026042	Col5a2	1110014L14Rik	collagen, type V, alpha 2	protein-coding	chr1:45587197-45588298	0.874404	0.320429	11.22	10.78	11.93	13.23	8.72	12.86		chr1-21995		chr1-24843	chr1-27251		chr1-7823
Merged-chr15-67146855-5	chr15	67145958	67147607	+	18.806	CONTROL-1_Peaks|CONTROL-2_Peaks|CP27-2_Peaks|Flag-3_Peaks|H2A2_Peaks	intron (NM_009177, intron 2 of 8)	intron (NM_009177, intron 2 of 8)	30100	NM_009177	20442	Mm.248334	NM_009177	ENSMUSG00000013846	St3gal1	5330418N22Rik|AI467004|ST3GalI|Siat4|Siat4a|St3gal-1	ST3 beta-galactoside alpha-2,3-sialyltransferase 1	protein-coding	chr15:67145958-67147607	0.874052	0.671506	30.41	24.9	27.37	35.91	13.95	33.44	chr15-18317	chr15-19121			chr15-7499		chr15-414	chr15-10289
Merged-chr3-136941705-2	chr3	136941373	136942038	+	5.59	Flag-3_Peaks|H2A2_Peaks	Intergenic	Intergenic	271639	NM_001293622	19055	Mm.331389	NM_008913	ENSMUSG00000028161	Ppp3ca	2900074D19Rik|CN|Caln|Calna|CnA	protein phosphatase 3, catalytic subunit, alpha isoform	protein-coding	chr3:136941373-136942038	0.873259	0.891548	1.81	4.46	4.91	2.27	6.54	5.14							chr3-1416	chr3-34419
Merged-chr8-121451561-3	chr8	121451165	121451890	+	7.51	CONTROL-1_Peaks|Flag-3_Peaks|H2A2_Peaks	Intergenic	Intergenic	90427	NM_001357259	76405	Mm.165697	NM_029597	ENSMUSG00000031809	1700018B08Rik	1700084O22Rik	RIKEN cDNA 1700018B08 gene	protein-coding	chr8:121451165-121451890	0.871389	0.127439	9.78	8.92	10.88	10.58	6.98	9.43	chr8-8713						chr8-193	chr8-12091
Merged-chr15-101381587-5	chr15	101380555	101382382	+	17.922	CONTROL-1_Peaks|CONTROL-2_Peaks|CP27-1_Peaks|CP27-2_Peaks|Flag-3_Peaks	Intergenic	Intergenic	-11306	NM_028770	74127	Mm.440055	NM_028770	ENSMUSG00000037185	Krt80	1200016G03Rik|2310041I20Rik|CK-80|K80|Kb20	keratin 80	protein-coding	chr15:101380555-101382382	0.870356	0.516769	30.05	24.53	29.83	32.88	14.83	28.29	chr15-25372	chr15-21576		chr15-6779	chr15-7667		chr15-940
Merged-chr15-74586899-3	chr15	74586358	74587472	+	7.00333	CP27-1_Peaks|Flag-3_Peaks|H2A2_Peaks	exon (NM_001359759, exon 28 of 31)	exon (NM_001359759, exon 28 of 31)	49403	NM_001177437	69439	Mm.263708	NM_001177437	ENSMUSG00000022603	Mroh4	1700016M24Rik	maestro heat-like repeat family member 4	protein-coding	chr15:74586358-74587472	0.869474	0.207908	7.6	8.92	8.42	10.58	10.47	12				chr15-21256			chr15-1365	chr15-28483
Merged-chr1-157507145-6	chr1	157505689	157508505	+	44.485	CONTROL-1_Peaks|CONTROL-2_Peaks|CP27-1_Peaks|CP27-2_Peaks|Flag-3_Peaks|H2A2_Peaks	intron (NR_027641, intron 1 of 26)	(A)n|Simple_repeat|Simple_repeat	301	NR_027641	89867	Mm.87114	NM_033354	ENSMUSG00000026589	Sec16b	Lztr2|Rgpr|Rgpr-p117	SEC16 homolog B (S. cerevisiae)	protein-coding	chr1:157505689-157508505	0.868461	0.421699	55.76	51.66	57.55	66.14	16.57	77.59	chr1-18038	chr1-19814		chr1-17240	chr1-11638		chr1-7362	chr1-18762
Merged-chr4-72280589-2	chr4	72280318	72280861	+	6.835	CP27-2_Peaks|Flag-3_Peaks	Intergenic	Lx5|LINE|L1	79345	NR_027923	68285	Mm.37541	NR_027923		C630043F03Rik	AI851307	RIKEN cDNA C630043F03 gene	ncRNA	chr4:72280318-72280861	0.866667	0.818788	5.07	5.2	3.16	8.69	6.11	2.14					chr4-16016		chr4-5457
Merged-chr11-117896841-2	chr11	117896471	117897212	+	5.59	Flag-3_Peaks|H2A2_Peaks	Intergenic	Intergenic	-23315	NM_027919	71776	Mm.3200	NM_027919	ENSMUSG00000017713	Tha1	1300017K07Rik|GLY1	threonine aldolase 1	protein-coding	chr11:117896471-117897212	0.865966	0.0990547	3.62	2.97	4.21	3.4	6.11	5.57							chr11-1181	chr11-34312
Merged-chr4-86107212-2	chr4	86106685	86107677	+	8.48	CP27-1_Peaks|Flag-3_Peaks	intron (NM_029967, intron 2 of 27)	intron (NM_029967, intron 2 of 27)	53206	NM_001368621	77739	Mm.331690	NM_029967	ENSMUSG00000066113	Adamtsl1	5930437A14Rik|6720426B09Rik|ADAMTSL-1	ADAMTS-like 1	protein-coding	chr4:86106685-86107677	0.861261	0.726882	5.79	8.55	9.47	7.18	11.77	6.86				chr4-18326			chr4-801
Merged-chr11-101727096-2	chr11	101726846	101727347	+	6.67	CP27-2_Peaks|Flag-3_Peaks	Intergenic	Intergenic	-5860	NM_144831	217207	Mm.28186	NM_144831	ENSMUSG00000034931	Dhx8	Ddx8|mDEAH6|mKIAA4096	DEAH (Asp-Glu-Ala-His) box polypeptide 8	protein-coding	chr11:101726846-101727347	0.85257	0.798466	5.07	3.72	3.51	6.8	6.54	4.72					chr11-19169		chr11-1107
Merged-chr11-95211973-2	chr11	95211631	95212280	+	6.43	Flag-3_Peaks|H2A2_Peaks	Intergenic	Intergenic	-49574	NM_053093	93670	Mm.40085	NM_053093	ENSMUSG00000020872	Tac4	AW489379|PPT-C	tachykinin 4	protein-coding	chr11:95211631-95212280	0.851744	0.1112	3.26	2.6	3.86	3.02	6.98	9.86							chr11-1080	chr11-25135
Merged-chr6-17611609-3	chr6	17611220	17611957	+	6.53667	CONTROL-2_Peaks|CP27-2_Peaks|Flag-3_Peaks	Intergenic	Intergenic	-25422	NM_007604	12343	Mm.392504	NM_007604	ENSMUSG00000015733	Capza2	1110053K06Rik|AW208808|Cappa2	capping protein (actin filament) muscle Z-line, alpha 2	protein-coding	chr6:17611220-17611957	0.851014	0.547999	6.88	7.8	6.67	10.58	6.98	6.86		chr6-23982			chr6-13695		chr6-1613
Merged-chr1-73507166-3	chr1	73506783	73507614	+	6.30667	CONTROL-2_Peaks|CP27-2_Peaks|Flag-3_Peaks	Intergenic	Intergenic	-99629	NR_003202	723792	Mm.385493	NR_003202		Pinc	-	pregnancy induced noncoding RNA	ncRNA	chr1:73506783-73507614	0.848209	0.010185	5.79	8.18	7.02	9.45	8.29	7.72		chr1-32546			chr1-27773		chr1-6906
Merged-chr11-94958428-6	chr11	94957315	94959246	+	47.9183	CONTROL-1_Peaks|CONTROL-2_Peaks|CP27-1_Peaks|CP27-2_Peaks|Flag-3_Peaks|H2A2_Peaks	Intergenic	Intergenic	-9313	NM_018792	54388	Mm.30482	NM_018792	ENSMUSG00000038994	Hils1	H1.9|TISP64	histone H1-like protein in spermatids 1	protein-coding	chr11:94957315-94959246	0.840134	0.290286	61.55	51.28	67.02	67.28	13.95	65.16	chr11-9123	chr11-4830		chr11-8884	chr11-8949		chr11-1716	chr11-17161
Merged-chr17-87302664-6	chr17	87301898	87303357	+	37.4633	CONTROL-1_Peaks|CONTROL-2_Peaks|CP27-1_Peaks|CP27-2_Peaks|Flag-3_Peaks|H2A2_Peaks	intron (NM_028639, intron 3 of 19)	intron (NM_028639, intron 3 of 19)	19741	NM_028639	225049	Mm.77396	NM_028639	ENSMUSG00000036918	Ttc7	1110035E02Rik|1700007L07Rik|Ttc7a|fsn|hea	tetratricopeptide repeat domain 7	protein-coding	chr17:87301898-87303357	0.823594	0.382593	45.62	37.53	48.42	52.54	13.08	51.44	chr17-14368	chr17-12148		chr17-2909	chr17-8794		chr17-3163	chr17-12403
Merged-chr17-23644265-2	chr17	23644011	23644519	+	7.575	CP27-2_Peaks|Flag-3_Peaks	intron (NM_001033339, intron 1 of 9)	intron (NM_001033339, intron 1 of 9)	1004	NM_001033339	240047	Mm.235343	NM_001033339	ENSMUSG00000023903	Mmp25	F730048C11Rik|Leukolysin|MMP20|MT6-MMP	matrix metallopeptidase 25	protein-coding	chr17:23644011-23644519	0.814371	0.546169	5.43	4.09	5.26	6.43	8.72	2.14					chr17-15708		chr17-456
Merged-chr11-84962850-2	chr11	84962549	84963151	+	6.01	Flag-3_Peaks|H2A2_Peaks	intron (NM_007607, intron 2 of 7)	intron (NM_007607, intron 2 of 7)	5096	NM_007607	12351	Mm.1641	NM_007607	ENSMUSG00000000805	Car4	AW456718|Ca4	carbonic anhydrase 4	protein-coding	chr11:84962549-84963151	0.800872	0.619133	2.17	3.34	3.86	3.02	6.54	6.86							chr11-1655	chr11-29329
Merged-chr2-18047660-6	chr2	18046105	18049376	+	346.837	CONTROL-1_Peaks|CONTROL-2_Peaks|CP27-1_Peaks|CP27-2_Peaks|Flag-3_Peaks|H2A2_Peaks	exon (NM_028317, exon 1 of 1)	exon (NM_028317, exon 1 of 1)	709	NM_028317	72668	Mm.102183	NM_028317	ENSMUSG00000054074	Skida1	2810030E01Rik|5730507N06Rik|BB088113|DLN-1	SKI/DACH domain containing 1	protein-coding	chr2:18046105-18049376	0.795548	0.0407809	347.93	347.84	431.6	442.98	47.1	690.14	chr2-4628	chr2-4446		chr2-6724	chr2-3154		chr2-2288	chr2-159
Merged-chr5-142824473-2	chr5	142824060	142824887	+	8.245	Flag-3_Peaks|H2A2_Peaks	Intergenic	(TG)n|Simple_repeat|Simple_repeat	-6811	NM_001122730	231861	Mm.354649	NM_178242	ENSMUSG00000039477	Tnrc18	BC025631|EG381742|Zfp469	trinucleotide repeat containing 18	protein-coding	chr5:142824060-142824887	0.789836	0.196974	4.71	4.46	6.32	5.29	10.47	12.43							chr5-2546	chr5-18289
Merged-chr4-116180173-3	chr4	116179876	116180514	+	6.27667	CP27-1_Peaks|CP27-2_Peaks|Flag-3_Peaks	Intergenic	Intergenic	6823	NM_001099295	67323	Mm.45442	NM_001099295	ENSMUSG00000078593	1700042G07Rik	P3r3urf	RIKEN cDNA 1700042G07 gene	protein-coding	chr4:116179876-116180514	0.775826	0.383004	3.98	7.06	6.67	7.56	6.98	5.14				chr4-18872	chr4-20705		chr4-7225
Merged-chr17-87776181-2	chr17	87775897	87776528	+	7.305	CP27-1_Peaks|Flag-3_Peaks	intron (NM_199251, intron 1 of 1)	intron (NM_199251, intron 1 of 1)	21782	NM_199251	210741	Mm.312046	NM_199251	ENSMUSG00000050138	Kcnk12	mntk1	potassium channel, subfamily K, member 12	protein-coding	chr17:87775897-87776528	0.774167	0.243816	5.07	4.46	7.02	5.29	8.29	5.14				chr17-17458			chr17-1729
Merged-chr1-133213547-5	chr1	133212708	133214242	+	7.868	CONTROL-2_Peaks|CP27-1_Peaks|CP27-2_Peaks|Flag-3_Peaks|H2A2_Peaks	Intergenic	Intergenic	-32622	NM_001160268	240753	Mm.253559	NM_182930	ENSMUSG00000041757	Plekha6	9530028L01Rik|AU042621|Pepp3	pleckstrin homology domain containing, family A member 6	protein-coding	chr1:133212708-133214242	0.767523	0.300608	17.02	13.75	19.3	20.79	11.77	23.58		chr1-30038		chr1-21448	chr1-25691		chr1-7216	chr1-30833
Merged-chr5-114644853-2	chr5	114644456	114645321	+	7.61	CP27-1_Peaks|Flag-3_Peaks	exon (NM_022017, exon 2 of 16)	exon (NM_022017, exon 2 of 16)	13533	NM_022017	63873	Mm.266450	NM_022017	ENSMUSG00000014158	Trpv4	0610033B08Rik|OTRPC4|Trp12|VR-OAC|VRL-2|VROAC	transient receptor potential cation channel, subfamily V, member 4	protein-coding	chr5:114644456-114645321	0.760159	0.661113	4.71	4.83	8.77	3.78	10.03	2.14				chr5-18934			chr5-341
Merged-chr17-29531466-2	chr17	29531144	29531865	+	8.395	CP27-1_Peaks|Flag-3_Peaks	intron (NM_001162902, intron 1 of 1)	B3|SINE|B2	18089	NM_001162902	71138	Mm.158581	NM_001162901	ENSMUSG00000079580	Tmem217	4933413N12Rik|EG622644	transmembrane protein 217	protein-coding	chr17:29531144-29531865	0.757241	0.0577159	6.15	4.83	8.07	6.43	9.16	6				chr17-16294			chr17-248
Merged-chr19-5059388-4	chr19	5059091	5059779	+	8.7525	CONTROL-2_Peaks|CP27-1_Peaks|CP27-2_Peaks|Flag-3_Peaks	Intergenic	Intergenic	8627	NM_145495	225870	Mm.271922	NM_145495	ENSMUSG00000024883	Rin1	-	Ras and Rab interactor 1	protein-coding	chr19:5059091-5059779	0.738845	0.328773	7.6	9.29	12.28	10.58	8.29	10.72		chr19-9420		chr19-4177	chr19-8933		chr19-233
Merged-chr1-77082538-2	chr1	77082165	77082911	+	6.92	CP27-2_Peaks|Flag-3_Peaks	Intergenic	Intergenic	414230	NR_105770	102465180		NR_105770	ENSMUSG00000099141	Mir6352	Gm27481|mmu-mir-6352	microRNA 6352	ncRNA	chr1:77082165-77082911	0.731732	0.721913	4.34	2.97	2.81	7.18	9.16	2.14					chr1-22382		chr1-6360
Merged-chr1-157737653-2	chr1	157737354	157737953	+	6.65	CP27-1_Peaks|Flag-3_Peaks	Intergenic	RMER17C2|LTR|ERVK	211483	NM_001159986	89867	Mm.87114	NM_033354	ENSMUSG00000026589	Sec16b	Lztr2|Rgpr|Rgpr-p117	SEC16 homolog B (S. cerevisiae)	protein-coding	chr1:157737354-157737953	0.726426	0.693034	2.9	3.34	6.32	2.27	7.41	0.86				chr1-29824			chr1-7367
Merged-chr3-22230937-2	chr3	22230525	22231349	+	6.865	CP27-1_Peaks|Flag-3_Peaks	Intergenic	MTEb|LTR|ERVL-MaLR	-20433	NR_004439	19784		NR_004439		Rprl2	RPRH3|Rmrp3	ribonuclease P RNA-like 2	ncRNA	chr3:22230525-22231349	0.724117	0.0864645	6.15	5.95	8.77	7.94	8.72	6				chr3-21170			chr3-822
Merged-chr4-56055238-2	chr4	56054928	56055549	+	6.08	CP27-2_Peaks|Flag-3_Peaks	Intergenic	Intergenic	-522763	NM_010637	16600	Mm.4325	NM_010637	ENSMUSG00000003032	Klf4	EZF|Gklf|Zie	Kruppel-like factor 4 (gut)	protein-coding	chr4:56054928-56055549	0.715523	0.115067	4.34	5.57	6.67	7.18	8.29	1.71					chr4-24901		chr4-2713
Merged-chr1-134725400-6	chr1	134724895	134726018	+	12.7017	CONTROL-1_Peaks|CONTROL-2_Peaks|CP27-1_Peaks|CP27-2_Peaks|Flag-3_Peaks|H2A2_Peaks	intron (NM_001355726, intron 1 of 8)	intron (NM_001355726, intron 1 of 8)	16156	NM_001355726	20980	Mm.5102	NM_009307	ENSMUSG00000026452	Syt2	IP4BP|R74640|mKIAA4194|sytII	synaptotagmin II	protein-coding	chr1:134724895-134726018	0.713496	0.328164	14.48	12.64	16.84	21.17	12.21	18.86	chr1-14106	chr1-16070		chr1-8594	chr1-15610		chr1-5789	chr1-15582
Merged-chr1-190667596-2	chr1	190667299	190667932	+	7.74	CP27-1_Peaks|Flag-3_Peaks	Intergenic	Intergenic	244155	NM_178775	320119	Mm.220912	NM_178775	ENSMUSG00000089872	Rps6kc1	AA682037|B130003F20Rik|C80612|Rpk118	ribosomal protein S6 kinase polypeptide 1	protein-coding	chr1:190667299-190667932	0.706963	0.618099	4.34	2.97	8.07	2.27	8.29	4.29				chr1-18825			chr1-6721
Merged-chr13-22041936-7	chr13	22040361	22043309	+	12.4386	CONTROL-1_Peaks|CONTROL-2_Peaks|CP27-1_Peaks|CP27-2_Peaks|Flag-3_Peaks|H2A2_Peaks	promoter-TSS (NM_175656)	promoter-TSS (NM_175656)	-473	NM_175656	319158	Mm.14775	NM_175656	ENSMUSG00000060639	Hist1h4i	-	histone cluster 1, H4i	protein-coding	chr13:22040361-22043309	0.704319	0.189495	30.77	23.04	38.6	37.8	15.26	24.86	chr13-15544	chr13-13378		chr13-10065	chr13-10782,chr13-6536		chr13-147	chr13-18070
Merged-chr2-168611499-2	chr2	168610842	168612769	+	18.33	CP27-1_Peaks|Flag-3_Peaks	Intergenic	(TGGA)n|Simple_repeat|Simple_repeat	-10148	NM_001291173	18019	Mm.116802	NM_010899	ENSMUSG00000027544	Nfatc2	AI607462|NF-ATc2|NF-ATp|NFAT1|NFAT1-D|Nfatp	nuclear factor of activated T cells, cytoplasmic, calcineurin dependent 2	protein-coding	chr2:168610842-168612769	0.692348	0.487844	6.52	6.69	12.28	6.8	31.4	7.72				chr2-28835			chr2-4551
Merged-chr2-158881210-2	chr2	158880650	158881954	+	10.16	CP27-1_Peaks|Flag-3_Peaks	Intergenic	Intergenic	86495	NM_001291144	71715	Mm.315652	NM_145742	ENSMUSG00000027655	Dhx35	1200009D07Rik|Ddx35	DEAH (Asp-Glu-Ala-His) box polypeptide 35	protein-coding	chr2:158880650-158881954	0.597025	0.191994	4.34	4.09	8.07	6.05	18.32	5.14				chr2-25554			chr2-2168
Merged-chr1-105239189-2	chr1	105238806	105239572	+	6.515	CP27-2_Peaks|Flag-3_Peaks	Intergenic	Intergenic	-116818	NR_151539	100504568	Mm.321153	NR_151538	ENSMUSG00000097482	Gm17634	-	predicted gene, 17634	ncRNA	chr1:105238806-105239572	0.571552	0.619634	3.62	2.97	2.46	9.07	8.29	5.57					chr1-28521		chr1-6476
Merged-chr4-73697870-2	chr4	73697350	73698554	+	9.355	CP27-1_Peaks|Flag-3_Peaks	Intergenic	L1Md_F|LINE|L1	14438	NM_001081644	242502	Mm.331671	NM_001081644	ENSMUSG00000095341	Gm428	-	predicted gene 428	protein-coding	chr4:73697350-73698554	0.555755	0.0942841	8.69	3.72	14.39	7.94	13.52	3.86				chr4-16482			chr4-5540
Merged-chr7-44642220-2	chr7	44641924	44642516	+	7	CP27-1_Peaks|Flag-3_Peaks	intron (NM_028021, intron 9 of 39)	intron (NM_028021, intron 9 of 39)	23283	NM_001271538	71960	Mm.158289	NM_028021	ENSMUSG00000030739	Myh14	2400004E04Rik|II-C|NHMCII|NMHC II-C	myosin, heavy polypeptide 14	protein-coding	chr7:44641924-44642516	0.541599	0.531213	1.81	4.83	7.72	4.54	7.85	5.14				chr7-14955			chr7-727
Merged-chr2-76924962-2	chr2	76924703	76925221	+	6.105	CP27-2_Peaks|Flag-3_Peaks	intron (NM_028004, intron 43 of 191)	intron (NM_028004, intron 43 of 191)	57585	NM_028004	22138	Mm.373672	NM_011652	ENSMUSG00000051747	Ttn	1100001C23Rik|2310036G12Rik|2310057K23Rik|2310074I15Rik|AF006999|AV006427|D330041I19Rik|D830007G01Rik|L56|mdm|shru	titin	protein-coding	chr2:76924703-76925221	0.516901	0.614231	1.81	1.86	1.05	6.05	6.54	2.57					chr2-27140		chr2-7306
Merged-chr15-28583614-2	chr15	28583303	28583926	+	6.835	CP27-2_Peaks|Flag-3_Peaks	Intergenic	L1Md_F2|LINE|L1	379848	NM_133365	110082	Mm.248464	NM_133365	ENSMUSG00000022262	Dnah5	AU022615|Dnahc5|Mdnah5|b2b1134Clo|b2b1154Clo|b2b1537Clo|b2b1565Clo|b2b3491Clo|b2b601Clo|mKIAA1603	dynein, axonemal, heavy chain 5	protein-coding	chr15:28583303-28583926	0.460729	0.287506	4.34	2.23	6.32	7.94	7.85	3.86					chr15-17125		chr15-3699
Merged-chr5-53391735-2	chr5	53391326	53392144	+	7.96	CP27-1_Peaks|Flag-3_Peaks	Intergenic	MTE2a|LTR|ERVL-MaLR	124629	NM_001145433	66278	Mm.27900	NM_001145433	ENSMUSG00000061461	Smim20	1110067B18Rik|1810013D10Rik|N28078	small integral membrane protein 20	protein-coding	chr5:53391326-53392144	0.432472	0.463262	3.26	2.6	10.53	3.02	8.72	6.43				chr5-13295			chr5-684
Merged-chr10-81521273-2	chr10	81520594	81521705	+	13.505	CP27-1_Peaks|Flag-3_Peaks	intron (NM_010304, intron 1 of 6)	(TCCA)n|Simple_repeat|Simple_repeat	3076	NM_010304	14676	Mm.1546	NM_010304	ENSMUSG00000034792	Gna15	G[a]15|Galpha15	guanine nucleotide binding protein, alpha 15	protein-coding	chr10:81520594-81521705	0.430008	0.197503	2.53	2.6	7.02	4.91	22.68	4.29				chr10-18942			chr10-14
Merged-chr15-77922164-2	chr15	77921844	77922484	+	7.08	CP27-2_Peaks|Flag-3_Peaks	intron (NM_019913, intron 3 of 3)	PB1D11|SINE|Alu	6830	NM_019913	56551	Mm.291917	NM_019913	ENSMUSG00000005354	Txn2	2510006J11Rik|AI788873|Trx2	thioredoxin 2	protein-coding	chr15:77921844-77922484	0.37931	0.16478	1.45	3.72	4.56	9.07	8.29	3					chr15-23912		chr15-4909
Merged-chr2-5180893-2	chr2	5180536	5181251	+	5.815	CP27_vs_CONTROL_Peaks|Flag-3_Peaks	intron (NM_028804, intron 2 of 2)	MTD|LTR|ERVL-MaLR	43117	NM_028804	74186	Mm.274715	NM_028804	ENSMUSG00000026676	Ccdc3	2310045O21Rik	coiled-coil domain containing 3	protein-coding	chr2:5180536-5181251	0.244147	0.0477973	1.81	1.11	6.67	5.29	6.98	1.71						chr2-33708	chr2-5407
Merged-chr15-83855714-2	chr15	83855429	83855999	+	6.345	CP27_vs_CONTROL_Peaks|Flag-3_Peaks	intron (NM_172610, intron 6 of 6)	intron (NM_172610, intron 6 of 6)	63659	NM_001161629	77627	Mm.196288	NM_029946	ENSMUSG00000022441	Efcab6	4931407K02Rik|4932408N08Rik|bM150J22.2|mKIAA1672	EF-hand calcium binding domain 6	protein-coding	chr15:83855429-83855999	0.195035	0.00280447	1.09	1.11	5.61	5.67	8.29	3.43						chr15-34002	chr15-2785
