# Supplementary material for: CFDP1 regulates the stability of pericentric heterochromatin thereby affecting RAN GTPase activity and mitotic spindle formation
Source: PLoS Biol. 2024 Apr 17;22(4):e3002574. doi: 10.1371/journal.pbio.3002574 (PMC11023358; doi:10.1371/journal.pbio.3002574)
Supplement: S4 Data — (XLSX) [file pbio.3002574.s015.xlsx]

## Sheet: Figure 7A B
Notes
ID
Run Started	02/03/2018 00:00:39 UTC
Run Ended	02/03/2018 01:05:57 UTC
Sample Vol	20
Lid Temp	105
Protocol File Name	Protocol 082615.prcl
Plate Setup File Name	Quick Plate_96 wells_SYBR Only.pltd
Base Serial Number	CC011605
Optical Head Serial Number	785BR4368
CFX Manager Version	3.1.1517.0823.
Well group	All Wells
Amplification step	3
Melt step	5
													Ratio
Well				Cq						avg	stdev		x/h2b			AVG	stdev
A01	min sat	consi	H2az	16.6301		10.5358	-6.09427	0.0146367	1.46367	1.54346	0.11285		0.18292		0.173463	0.18292	0.0133742				Rcc1 levels in control cells
A02				16.4808		10.5358	-5.94496	0.0162326	1.62326						0.192377											RCC1	min sat
A03			H2b	14.1392		10.5358	-3.60341	0.0822748	8.22748	8.43789	0.297563										Rcc1	min	0.0264498	0.000502918		con si	0.00313465	5.96023e-05
A04				14.0673		10.5358	-3.53144	0.086483	8.6483													majI	0.0140259	0.000430579		cp27 si	0.00281799	0.000137158	P=0.0036
A05			Rcc1	22.401		10.5358	-11.8652	0.000268054	0.0268054	0.0264498	0.000502918		0.00313465		0.00317679	0.00313465	5.96023e-05					majII	0.0106356	0.00020854
A06				22.4398		10.5358	-11.904	0.000260942	0.0260942						0.0030925
A07			beads	24.1889		10.5358	-13.6531	7.76279e-05	0.00776279	0.00761807	0.000204669
A08				24.2437		10.5358	-13.7079	7.47334e-05	0.00747334
A09		cp27 si	H2az	17.0329		10.6765	-6.35639	0.012205	1.2205	1.25501	0.0488097		0.129655		0.126089	0.129655	0.00504252
A10				16.9535		10.6765	-6.27702	0.0128952	1.28952						0.13322
A11			H2b	14.0441		10.6765	-3.36762	0.0968827	9.68827	9.67963	0.0122251
A12				14.0467		10.6765	-3.37019	0.0967098	9.67098
B01			Rcc1	22.5671		10.6765	-11.8906	0.000263383	0.0263383	0.0272771	0.00132764		0.00281799		0.002721	0.00281799	0.000137158
B02				22.4677		10.6765	-11.7912	0.000282159	0.0282159						0.00291497
B03			beads	24.5327		10.6765	-13.8562	6.74311e-05	0.00674311	0.00673444	1.22616e-05
B04				24.5365		10.6765	-13.8599	6.72577e-05	0.00672577
B05		input	consi	10.5931	10.5358
B06				10.4786
B07			cp27si	10.6516	10.6765
B08				10.7014
B09	maj sat I	consi	H2az	12.5139		3.83028	-8.68358	0.0024321	0.24321	0.245849	0.00373144		0.0389332		0.0385153	0.0389332	0.000590919
B10				12.4829		3.83028	-8.65261	0.00248487	0.248487						0.039351
B11			H2b	7.74406		3.83028	-3.91379	0.0663488	6.63488	6.31464	0.452891
B12				7.89052		3.83028	-4.06024	0.0599439	5.99439													P=0.0014
C01			Rcc1	16.6616		3.83028	-12.8313	0.000137215	0.0137215	0.0140259	0.000430579		0.00222118		0.00217296	0.00222118	6.81875e-05
C02				16.5989		3.83028	-12.7686	0.000143304	0.0143304						0.0022694
C03			beads	18.4317		3.83028	-14.6014	4.02291e-05	0.00402291	0.0041675	0.000204473
C04				18.3315		3.83028	-14.5013	4.31208e-05	0.00431208
C05		cp27 si	H2az	12.9838		3.67193	-9.3119	0.0015734	0.15734	0.156402	0.00132549		0.0230777		0.023216	0.0230777	0.000195581
C06				13.0011		3.67193	-9.32919	0.00155465	0.155465						0.0229394
C07			H2b	7.50392		3.67193	-3.832	0.0702189	7.02189	6.7772	0.346047
C08				7.60815		3.67193	-3.93622	0.0653251	6.53251
C09			Rcc1	16.7251		3.67193	-13.0531	0.000117656	0.0117656	0.0121093	0.000486046		0.00178677		0.00173605	0.00178677	7.17179e-05
C10				16.6432		3.67193	-12.9712	0.00012453	0.012453						0.00183748
C11			beads	18.4949		3.67193	-14.823	3.45021e-05	0.00345021	0.0034702	2.827e-05
C12				18.4783		3.67193	-14.8063	3.49019e-05	0.00349019
D01		input	consi	4.08665	3.83028
D02				3.57391
D03			cp27si	3.70169	3.67193
D04				3.64217
D05	maj sat II	consi	H2az	12.4921		3.24311	-9.24902	0.00164349	0.164349	0.169767	0.00766144		0.0392799		0.0380265	0.0392799	0.00177267
D06				12.4		3.24311	-9.15691	0.00175184	0.175184						0.0405334
D07			H2b	7.79044		3.24311	-4.54733	0.0427678	4.27678	4.32198	0.0639163
D08				7.76027		3.24311	-4.51716	0.0436717	4.36717
D09			Rcc1	16.4221		3.24311	-13.1789	0.000107831	0.0107831	0.0106356	0.00020854		0.00246082		0.00249494	0.00246082	4.82512e-05
D10				16.4621		3.24311	-13.219	0.000104881	0.0104881						0.0024267
D11			beads	18.308		3.24311	-15.0649	2.9176e-05	0.0029176	0.00278742	0.000184113
D12				18.4428		3.24311	-15.1997	2.65723e-05	0.00265723
E01		cp27 si	H2az	13.0653		3.6744	-9.39089	0.00148957	0.148957	0.154262	0.00750227		0.0236032		0.0227915	0.0236032	0.0011479				H2az
E02				12.966		3.6744	-9.29162	0.00159567	0.159567						0.0244149
E03			H2b	7.64425		3.6744	-3.96986	0.0638196	6.38196	6.53564	0.217333
E04				7.57639		3.6744	-3.902	0.0668932	6.68932
E05			Rcc1	16.5205		3.6744	-12.8462	0.000135807	0.0135807	0.013522	8.30132e-05		0.00206897		0.00207795	0.00206897	1.27016e-05
E06				16.5331		3.6744	-12.8587	0.000134633	0.0134633						0.00205999
E07			beads	18.2916		3.6744	-14.6172	3.9792e-05	0.0039792	0.0037749	0.000288929
E08				18.4479		3.6744	-14.7735	3.57059e-05	0.00357059
E09		input	consi	3.12708	3.24311
E10				3.35914
E11			cp27si	3.57023	3.6744
E12				3.77856
				AVG	stdev																RCC1
	min sat	consi	H2az	0.18292	0.0133742			min sat	H2az	consi	0.18292	0.0133742		RCC1	consi	0.00313465	5.96023e-05
			Rcc1	0.00313465	5.96023e-05					cp27 si	0.129655	0.00504252			cp27 si	0.00281799	0.000137158
		cp27 si	H2az	0.129655	0.00504252
			Rcc1	0.00281799	0.000137158
	maj sat I	consi	H2az	0.0389332	0.000590919			maj sat I	H2az	consi	0.0389332	0.000590919			consi	0.00222118	6.81875e-05
			Rcc1	0.00222118	6.81875e-05					cp27 si	0.0230777	0.000195581			cp27 si	0.00178677	7.17179e-05
		cp27 si	H2az	0.0230777	0.000195581																		P=0.0080
			Rcc1	0.00178677	7.17179e-05
	maj sat II	consi	H2az	0.0392799	0.00177267			maj sat II	H2az	consi	0.0392799	0.00177267			consi	0.00246082	4.82512e-05
			Rcc1	0.00246082	4.82512e-05					cp27 si	0.0236032	0.0011479			cp27 si	0.00206897	1.27016e-05
		cp27 si	H2az	0.0236032	0.0011479
			Rcc1	0.00206897	1.27016e-05

## Sheet: Figure 7 CDEF and S3A D
Notes
ID
Run Started	08/28/2020 23:46:54 UTC
Run Ended	08/29/2020 00:51:55 UTC
Sample Vol	20
Lid Temp	105
Protocol File Name	Protocol 082615.prcl
Plate Setup File Name	Quick Plate_96 wells_SYBR Only.pltd
Base Serial Number	CC011605
Optical Head Serial Number	785BR4368
CFX Manager Version	3.1.1517.0823.
Well group	All Wells							ChIP in mitotic 3T3 cells after con and Cp27 siRNA
Amplification step	3
Melt step	5
Well				Cq						avg	stdev
A01	min SAT	con si	Rcc1	15.8654		10.8687	-4.99678	0.0313199	3.13199	3.17806	0.0651511
A02				15.8236		10.8687	-4.95495	0.0322412	3.22412
A03			H2az	14.6397		10.8687	-3.77103	0.07325	7.325	7.46665	0.200319
A04				14.5849		10.8687	-3.71628	0.0760829	7.60829
A05			beads	36.2323		10.8687	-25.3637	2.31621e-08	2.31621e-06	1.41065e-06	1.28065e-06
A06				38.4295		10.8687	-27.5608	5.05092e-09	5.05092e-07
A07		Cp27 si	Rcc1	15.7896		10.0965	-5.69307	0.0193293	1.93293	1.98565	0.0745586
A08				15.7129		10.0965	-5.61644	0.0203837	2.03837
A09			H2az	14.2805		10.0965	-4.18401	0.0550159	5.50159	5.69958	0.279994
A10				14.1802		10.0965	-4.08374	0.0589756	5.89756
A11			beads	NaN		10.0965	#VALUE!	#VALUE!	#VALUE!
A12				38.7861		10.0965	-28.6896	2.30975e-09	2.30975e-07
B01		Input	con si	11.1085	10.8687		-11.1085	0.000452891	0.0452891
B02				10.6288			-10.6288	0.000631565	0.0631565
B03			Cp27 si	10.1243	10.0965		-10.1243	0.000895971	0.0895971
B04				10.0687			-10.0687	0.000931136	0.0931136
B05	maj SAT I	con si	Rcc1	10.2504		3.68018	-6.57026	0.0105233	1.05233	1.09835	0.0650799
B06				10.1295		3.68018	-6.4493	0.0114437	1.14437
B07			H2az	9.80048		3.68018	-6.1203	0.0143749	1.43749	1.41368	0.0336758
B08				9.84908		3.68018	-6.16891	0.0138987	1.38987
B09			beads	31.1497		3.68018	-27.4696	5.38069e-09	5.38069e-07	3.35904e-07	2.85905e-07
B10				33.1581		3.68018	-29.4779	1.33738e-09	1.33738e-07
B11		Cp27 si	Rcc1	10.1213		2.05497	-8.06636	0.00373063	0.373063	0.368491	0.00646592
B12				10.1571		2.05497	-8.10217	0.00363919	0.363919
C01			H2az	9.48494		2.05497	-7.42998	0.00579902	0.579902	0.614874	0.0494573
C02				9.32066		2.05497	-7.26569	0.00649845	0.649845
C03			beads	36.5161		2.05497	-34.4611	4.22841e-11	4.22841e-09	4.65658e-09	6.05529e-10
C04				36.25		2.05497	-34.195	5.08475e-11	5.08475e-09
C05		Input	con si	3.80932	3.68018		-3.80932	0.0713315	7.13315
C06				3.55104			-3.55104	0.085316	8.5316
C07			Cp27 si	2.31734	2.05497		-2.31734	0.200637	20.0637
C08				1.7926			-1.7926	0.288652	28.8652
C09	maj SAT II	con si	Rcc1	10.1306		3.67561	-6.45497	0.0113988	1.13988	1.17829	0.0543249
C10				10.0365		3.67561	-6.36087	0.0121671	1.21671
C11			H2az	9.83799		3.67561	-6.16238	0.0139617	1.39617	1.47149	0.106509
C12				9.69018		3.67561	-6.01457	0.015468	1.5468
D01			beads	30.6468		3.67561	-26.9712	7.60062e-09	7.60062e-07	7.92445e-07	4.57962e-08
D02				30.5289		3.67561	-26.8533	8.24827e-09	8.24827e-07
D03		Cp27 si	Rcc1	10.007		2.49528	-7.51169	0.00547969	0.547969	0.5191	0.0408272
D04				10.1676		2.49528	-7.67232	0.00490231	0.490231
D05			H2az	9.34217		2.49528	-6.84689	0.00868724	0.868724	0.882134	0.0189647
D06				9.2983		2.49528	-6.80302	0.00895544	0.895544
D07			beads	33.6726		2.49528	-31.1774	4.11793e-10	4.11793e-08	2.45608e-08	2.35021e-08
D08				36.0469		2.49528	-33.5516	7.94233e-11	7.94233e-09
D09		Input	con si	3.78021	3.67561
D10				3.57101
D11			Cp27 si	2.35746	2.49528
D12				2.6331
	min SAT	con si	Rcc1	3.17806	0.0651511	min SAT	con si	Rcc1	3.17806	0.0651511
			H2az	7.46665	0.200319		Cp27 si	Rcc1	1.98565	0.0745586
			beads	1.41065e-06	1.28065e-06
															P=0.0034								P=0.0185
		Cp27 si	Rcc1	1.98565	0.0745586		con si	H2az	7.46665	0.200319
			H2az	5.69958	0.279994		Cp27 si	H2az	5.69958	0.279994
	maj SAT I	con si	Rcc1	1.09835	0.0650799
			H2az	1.41368	0.0336758
			beads	3.35904e-07	2.85905e-07
		Cp27 si	Rcc1	0.368491	0.00646592
			H2az	0.614874	0.0494573
			beads	4.65658e-09	6.05529e-10
	maj SAT II	con si	Rcc1	1.17829	0.0543249		maj SAT II	con si	Rcc1	1.17829	0.0543249
			H2az	1.47149	0.106509			Cp27 si	Rcc1	0.5191	0.0408272
			beads	7.92445e-07	4.57962e-08
								con si	H2az	1.41368	0.0336758
		Cp27 si	Rcc1	0.5191	0.0408272			Cp27 si	H2az	0.614874	0.0494573				P=0.0053								P=0.0028
			H2az	0.882134	0.0189647
			beads	2.45608e-08	2.35021e-08
		COMPARISON OF RCC1 AND H2AZ LEVELS BETWEEN MIN AND MAJ SATs in Mitotic cells
		min SAT	con si	Rcc1	3.17806	0.0651511				RCC1	min SAT	3.17806	0.0651511		H2A.Z	min SAT	7.46665	0.200319			RCC1 levels at MIN sats between interphase					RCC1 levels at MAJ sats beween interphase
				H2az	7.46665	0.200319					maj SAT II	1.17829	0.0543249			maj SAT II	1.47149	0.106509			and mitotic chromatin					and mitotic chromatin
																					RCC1	interphase	0.0264498	0.000502918		RCC1	majII	0.0140259	0.000430579
											P=0.0009					P=0.0007					MIN sat	mitotic	3.17806	0.0651511		MAJ sat	maj SAT II	1.17829	0.0543249
		maj SAT II	con si	Rcc1	1.17829	0.0543249															RCC1	majII	0.0140259	0.000430579
				H2az	1.47149	0.106509															MAJ sat	maj SAT II	1.17829	0.0543249

## Sheet: Figure S3E
File Name	2018-03-30 14-05-33_CC011597.pcrd
Created By User	admin
Notes
ID
Run Started	03/30/2018 19:05:54 UTC
Run Ended	03/30/2018 20:11:20 UTC
Sample Vol	25
Lid Temp	105
Protocol File Name	ggProfile.prcl
Plate Setup File Name	Quick Plate_96 wells_SYBR Only.pltd
Base Serial Number	CC011597
Optical Head Serial Number	785BR4350
CFX Manager Version	3.1.1517.0823.
Well group	All Wells
Amplification step	3
Melt step	5
Well				Cq						avg	stdev		Ratio
A01	Min Sat	GFP con	H2az	15.6654		10.1827	-5.48272	0.0223633	2.23633	2.13887	0.137835		0.106126
A02				15.797		10.1827	-5.6143	0.020414	2.0414
A03			H2B	12.4304		10.1827	-2.24767	0.210564	21.0564	20.154	1.2762
A04				12.5597		10.1827	-2.37695	0.192516	19.2516
A05			beads	21.3517		10.1827	-11.169	0.000434293	0.0434293	0.0434844	7.79794e-05
A06				21.3481		10.1827	-11.1654	0.000435396	0.0435396
A07		GFP Cp27	H2az	16.1737		10.1813	-5.99244	0.0157071	1.57071	1.5581	0.0178375		0.0851837		No increase in H2az
A08				16.1971		10.1813	-6.0158	0.0154548	1.54548
A09			H2B	12.6037		10.1813	-2.42239	0.186546	18.6546	18.291	0.514262
A10				12.6611		10.1813	-2.47977	0.179274	17.9274
A11			beads	21.6681		10.1813	-11.4868	0.000348441	0.0348441	0.0344645	0.000536874
A12				21.6999		10.1813	-11.5186	0.000340849	0.0340849
B01		Input	GFP con	10.1614	10.1827		-10.1614	0.000873214	0.0873214
B02				10.204			-10.204	0.000847776	0.0847776
B03			GFP Cp27	10.1144	10.1813		-10.1144	0.000902099	0.0902099										RCC1 at MIN Sats in CFDP1 overexpressing cells
B04				10.2482			-10.2482	0.000822227	0.0822227
B05		FLAG con	RCC1	20.7577		9.8554	-10.9023	0.000522488	0.0522488	0.0523281	0.000112138		0.00370212						FLAG con	RCC1	0.0523281	0.000112138		P=0.0439
B06				20.7533		9.8554	-10.8979	0.000524073	0.0524073										FLAG CP27	RCC1	0.0612066	0.00271748
B07			H2B	12.5822		9.8554	-2.72679	0.151061	15.1061	14.1346	1.37396
B08				12.7808		9.8554	-2.92543	0.131631	13.1631
B09			beads	21.5087		9.8554	-11.6533	0.000310451	0.0310451	0.0309782	9.45656e-05
B10				21.515		9.8554	-11.6596	0.000309114	0.0309114
B11		FLAG CP27	RCC1	20.4832		9.76311	-10.72	0.000592851	0.0592851	0.0612066	0.00271748		0.00373179		very small increase
B12				20.3925		9.76311	-10.6294	0.000631282	0.0631282
C01			H2B	12.4117		9.76311	-2.64864	0.159471	15.9471	16.4014	0.642492
C02				12.3318		9.76311	-2.56869	0.168557	16.8557
C03			beads	21.5407		9.76311	-11.7776	0.000284833	0.0284833	0.0276138	0.00122968
C04				21.6316		9.76311	-11.8685	0.000267443	0.0267443
C05		input	FLAG con	9.80207	9.8554
C06				9.90873
C07			FLAG CP27	9.74706	9.76311
C08				9.77917
C09	Maj Sat I	GFP con	H2az	10.8519		2.34108	-8.51086	0.00274142	0.274142	0.274714	0.000809301		0.0342405
C10				10.8459		2.34108	-8.50485	0.00275286	0.275286
C11			H2B	5.96655		2.34108	-3.62547	0.0810258	8.10258	8.02306	0.112457
C12				5.99515		2.34108	-3.65407	0.0794354	7.94354
D01			beads	15.4871		2.34108	-13.146	0.000110318	0.0110318	0.0113068	0.000388884
D02				15.4169		2.34108	-13.0759	0.000115818	0.0115818
D03		GFP Cp27	H2az	11.3716		3.09499	-8.27663	0.00322468	0.322468	0.339179	0.0236327		0.0275369		h2az increase
D04				11.2293		3.09499	-8.13435	0.0035589	0.35589
D05			H2B	6.15081		3.09499	-3.05582	0.120256	12.0256	12.3173	0.412528
D06				6.08246		3.09499	-2.98748	0.12609	12.609
D07			beads	16.0805		3.09499	-12.9855	0.000123305	0.0123305	0.0126223	0.000412621
D08				16.0138		3.09499	-12.9188	0.000129141	0.0129141
D09		Input	GFP con	2.19305	2.34108
D10				2.48911
D11			GFP Cp27	3.00941	3.09499
D12				3.18056
E01		FLAG con	RCC1	14.8882		2.41946	-12.4688	0.000176412	0.0176412	0.0174095	0.000327677		0.00192024
E02				14.9266		2.41946	-12.5072	0.000171778	0.0171778
E03			H2B	5.86553		2.41946	-3.44607	0.0917549	9.17549	9.06631	0.154406
E04				5.90028		2.41946	-3.48082	0.0895713	8.95713
E05			beads	15.7235		2.41946	-13.3041	9.8872e-05	0.0098872	0.00974247	0.000204684
E06				15.7664		2.41946	-13.3469	9.59774e-05	0.00959774
E07		FLAG CP27	RCC1	14.4327		1.84329	-12.5894	0.000162261	0.0162261	0.0149721	0.00177332		0.00219348
E08				14.6749		1.84329	-12.8316	0.000137182	0.0137182
E09			H2B	5.62908		1.84329	-3.78579	0.0725043	7.25043	6.82575	0.600592
E10				5.80883		1.84329	-3.96554	0.0640107	6.40107
E11			beads	15.6629		1.84329	-13.8196	6.91631e-05	0.00691631	0.00679768	0.000167763
E12				15.7133		1.84329	-13.87	6.67906e-05	0.00667906
F01		input	FLAG con	2.54073	2.41946
F02				2.29818
F03			FLAG CP27	2.02822	1.84329
F04				1.65835
F05	Maj Sat II	GFP con	H2az	11.048		2.29847	-8.74955	0.0023234	0.23234	0.261793	0.0416525		0.0330859
F06				10.722		2.29847	-8.42355	0.00291246	0.291246
F07			H2B	6.02514		2.29847	-3.72668	0.0755367	7.55367	7.91252	0.507487
F08				5.8942		2.29847	-3.59573	0.0827137	8.27137
F09			beads	15.2363		2.29847	-12.9379	0.000127443	0.0127443	0.0130786	0.000472656
F10				15.1626		2.29847	-12.8641	0.000134128	0.0134128
F11		GFP Cp27	H2az	11.2291		2.45471	-8.77442	0.00228369	0.228369	0.222305	0.00857534		0.0282167
F12				11.3078		2.45471	-8.85314	0.00216241	0.216241
G01			H2B	6.1457		2.45471	-3.691	0.0774281	7.74281	7.8785	0.191885
G02				6.09601		2.45471	-3.6413	0.0801418	8.01418
G03			beads	15.7618		2.45471	-13.3071	9.86631e-05	0.00986631	0.00957461	0.000412526
G04				15.8498		2.45471	-13.3951	9.28291e-05	0.00928291
G05		Input	GFP con	2.11175	2.29847
G06				2.48518
G07			GFP Cp27	2.16941	2.45471
G08				2.74
G09		FLAG con	RCC1	14.7514		2.0266	-12.7248	0.000147724	0.0147724	0.0151882	0.000588065		0.00242562
G10				14.6724		2.0266	-12.6458	0.000156041	0.0156041
G11			H2B	5.88725		2.0266	-3.86065	0.0688379	6.88379	6.2616	0.879913
G12				6.17491		2.0266	-4.14831	0.0563941	5.63941
H01			beads	15.5636		2.0266	-13.537	8.41293e-05	0.00841293	0.00802597	0.000547243
H02				15.7028		2.0266	-13.6763	7.63901e-05	0.00763901
H03		FLAG CP27	RCC1	14.5388		1.96409	-12.5747	0.000163921	0.0163921	0.0160284	0.000514319		0.0024512
H04				14.6043		1.96409	-12.6402	0.000156647	0.0156647
H05			H2B	5.9397		1.96409	-3.97561	0.0635657	6.35657	6.53901	0.258016
H06				5.85917		1.96409	-3.89508	0.0672146	6.72146
H07			beads	15.7911		1.96409	-13.8271	6.88085e-05	0.00688085	0.00710077	0.00031101
H08				15.7018		1.96409	-13.7377	7.32069e-05	0.00732069
H09		input	FLAG con	1.94584	2.0266
H10				2.10735
H11			FLAG CP27	1.55056	1.96409
H12				2.37762

## Sheet: Figure S3F
File Name	2018-03-15 13-36-31_CC011597.pcrd
Created By User	admin
Notes
ID
Run Started	03/15/2018 18:37:00 UTC
Run Ended	03/15/2018 19:42:35 UTC
Sample Vol	20
Lid Temp	105
Protocol File Name	ggProfile.prcl
Plate Setup File Name	Quick Plate_96 wells_SYBR Only.pltd
Base Serial Number	CC011597
Optical Head Serial Number	785BR4350
CFX Manager Version	3.1.1517.0823.
Well group	All Wells
Amplification step	3
Melt step	5
Well				Cq
A01	Maj Sat II	con si	H2az	12.0366		4.76096	-7.27564	0.00645379	0.645379	0.610227	0.0497113		0.864082
A02				12.203		4.76096	-7.44203	0.00575076	0.575076
A03			H2B	11.9492		4.76096	-7.18826	0.00685675	0.685675	0.706215	0.0290478
A04				11.8653		4.76096	-7.10432	0.00726755	0.726755
A05			Rcc1	17.1137		4.76096	-12.3528	0.000191179	0.0191179	0.0190021	0.000163732		0.0269069
A06				17.1313		4.76096	-12.3704	0.000188863	0.0188863
A07			beads	17.8057		4.76096	-13.0448	0.00011834	0.011834	0.011957	0.000173984
A08				17.776		4.76096	-13.0151	0.000120801	0.0120801
A09		Cp27 si	H2az	12.2188		4.75265	-7.46618	0.00565528	0.565528	0.529423	0.051061		0.713248		h2az decrease							H2az chip
A10				12.4159		4.75265	-7.66327	0.00493317	0.493317													con	1.16278	0.017172
A11			H2B	11.8352		4.75265	-7.08254	0.00737807	0.737807	0.74227	0.00631205											IgG	0.00996893	8.25336e-06
A12				11.8178		4.75265	-7.06519	0.00746734	0.746734													Flag cp27	1.52737	0.102952
B01			Rcc1	16.6988		4.75265	-11.9462	0.000253422	0.0253422	0.0257361	0.000557139		0.0346722									IgG	0.00866653	0.000117052
B02				16.6547		4.75265	-11.902	0.000261301	0.0261301
B03			beads	18.1266		4.75265	-13.3739	9.42006e-05	0.00942006	0.00926501	0.00021927
B04				18.1748		4.75265	-13.4222	9.10996e-05	0.00910996													H2az chip
B05		3t3	H2az	11.7503		4.27536	-7.47496	0.00562098	0.562098	0.556289	0.00821532		1.16278	1.17492	1.16278	0.017172						con	1.16278	0.017172
B06				11.7805		4.27536	-7.50509	0.0055048	0.55048					1.15064								Flag cp27	1.52737	0.102952
B07			H2B	11.9687		4.27536	-7.69331	0.00483151	0.483151	0.478414	0.00669988
B08				11.9972		4.27536	-7.72188	0.00473676	0.473676
B09			Rcc1	16.4063		4.27536	-12.131	0.000222956	0.0222956	0.0211622	0.0016029		0.0442341									con	1.22717
B10				16.561		4.27536	-12.2856	0.000200288	0.0200288													Flag cp27	1.40256
B11			beads	17.5667		4.27536	-13.2914	9.97477e-05	0.00997477	0.00996893	8.25336e-06
B12				17.5684		4.27536	-13.293	9.9631e-05	0.0099631
C01		Flag cp27	H2az	12.5976		4.27565	-8.32199	0.00312486	0.312486	0.286862	0.0362392		1.52737	1.6638	1.52737	0.192952	h2az increase
C02				12.8561		4.27565	-8.58043	0.00261237	0.261237					1.39093
C03			H2B	13.2592		4.27565	-8.98356	0.00197551	0.197551	0.187814	0.0137699
C04				13.4089		4.27565	-9.13328	0.00178078	0.178078
C05			Rcc1	16.3148		4.27565	-12.0392	0.000237603	0.0237603	0.0226173	0.00161641		0.120424		RCC1 increase
C06				16.4608		4.27565	-12.1851	0.000214743	0.0214743
C07			beads	17.7561		4.27565	-13.4805	8.7493e-05	0.0087493	0.00866653	0.000117052
C08				17.7837		4.27565	-13.508	8.58376e-05	0.00858376
C09		Input	con si	4.80377	4.76096
C10				4.71814
C11			Cp27 si	4.68256	4.75265
C12				4.82275
D01			3t3	4.21845	4.27536
D02				4.33227
D03			Flag cp27	4.35723	4.27565
D04				4.19407
D05	Maj Sat II	con si	H2az	11.9609		5.00692	-6.95395	0.00806588	0.806588	0.853736	0.0666761		0.800619
D06				11.8014		5.00692	-6.79445	0.00900883	0.900883
D07			H2B	11.5873		5.00692	-6.58036	0.0104499	1.04499	1.06634	0.0301975
D08				11.5295		5.00692	-6.52258	0.010877	1.0877
D09			Rcc1	16.6147		5.00692	-11.6078	0.000320418	0.0320418	0.0315934	0.00063417		0.0296278
D10				16.6556		5.00692	-11.6487	0.00031145	0.031145
D11			beads	17.6867		5.00692	-12.6798	0.000152402	0.0152402	0.0159446	0.000996222
D12				17.5592		5.00692	-12.5523	0.000166491	0.0166491
E01		Cp27 si	H2az	12.359		4.71488	-7.64416	0.00499893	0.499893	0.501081	0.00167983		0.633518		h2az decrease
E02				12.3522		4.71488	-7.63733	0.00502269	0.502269
E03			H2B	11.63		4.71488	-6.9151	0.00828604	0.828604	0.790949	0.0532523
E04				11.7675		4.71488	-7.05257	0.00753294	0.753294
E05			Rcc1	16.353		4.71488	-11.6382	0.000313734	0.0313734	0.030919	0.000642715		0.039091		Rcc1 very slight decrease
E06				16.3955		4.71488	-11.6806	0.000304645	0.0304645									Maj SAT in FLAG CFDP1 overexpression
E07			beads	17.6737		4.71488	-12.9588	0.000125603	0.0125603	0.0111667	0.00197082
E08				18.0357		4.71488	-13.3208	9.77313e-05	0.00977313
E09		3t3	H2az	11.4162		4.16631	-7.24985	0.00657017	0.657017	0.636273	0.0293374		1.22717					3t3	H2az	1.22717	0.0293374
E10				11.5103		4.16631	-7.34396	0.00615528	0.615528										Rcc1	0.0410113	0.000310175
E11			H2B	11.7066		4.16631	-7.54033	0.00537197	0.537197	0.518486	0.0264617
E12				11.8108		4.16631	-7.64451	0.00499775	0.499775
F01			Rcc1	16.3806		4.16631	-12.2143	0.000210444	0.0210444	0.0212638	0.000310175		0.0410113					Flag cp27	H2az	1.40256	0.0353082
F02				16.3508		4.16631	-12.1845	0.000214831	0.0214831										Rcc1	0.120148	0.00061371
F03			beads	17.4647		4.16631	-13.2984	9.92652e-05	0.00992652	0.0103367	0.000580097
F04				17.3501		4.16631	-13.1838	0.000107469	0.0107469
F05		Flag cp27	H2az	12.914		4.21654	-8.69748	0.00240878	0.240878	0.265845	0.0353082		1.40256		h2az increase
F06				12.6422		4.21654	-8.4257	0.00290811	0.290811
F07			H2B	13.3196		4.21654	-9.10308	0.00181845	0.181845	0.189543	0.0108865							3t3	Rcc1	0.0410113	0.000310175
F08				13.2024		4.21654	-8.98583	0.00197241	0.197241									FLAGCp27	Rcc1	0.120148	0.00061371		P=0.0001
F09			Rcc1	16.3447		4.21654	-12.1281	0.000223393	0.0223393	0.0227733	0.00061371		0.120148		RCC1 increase
F10				16.2897		4.21654	-12.0731	0.000232072	0.0232072
F11			beads	17.624		4.21654	-13.4074	9.2037e-05	0.0092037	0.00892738	0.00039077
F12				17.7133		4.21654	-13.4968	8.65107e-05	0.00865107
G01		Input	con si	5.07094	5.00692
G02				4.9429
G03			Cp27 si	4.79062	4.71488
G04				4.63914
G05			3t3	4.17398	4.16631
G06				4.15864
G07			Flag cp27	4.09641	4.21654								RCC1	0.0212638	0.000310175
G08				4.33668									RCC1	0.0227733	0.00061371
