# Supplementary material for: CFDP1 regulates the stability of pericentric heterochromatin thereby affecting RAN GTPase activity and mitotic spindle formation
Source: PLoS Biol. 2024 Apr 17;22(4):e3002574. doi: 10.1371/journal.pbio.3002574 (PMC11023358; doi:10.1371/journal.pbio.3002574)
Supplement: S4 Table — (XLSX) [file pbio.3002574.s008.xlsx]

## Sheet: Sheet1
	S4 Table
	ANNOTATION FOR H2A.Z PEAKS ENRICHED IN CONTROL siRNA TREATED CELLS COMPARED TO CFDP1 siRNA TREATMENT
	PeakID (cmd=annotatePeaks.pl Peaks/CONTROL_vs_CP27_Peaks mm10 -d CONTROL CP27 -go Peaks/GOanalysis_CONTROL_vs_CP27_Peaks -genomeOntology Peaks/genomeOntology_CONTROL_vs_CP27_Peaks -cpu 8)	Chr	Start	End	Strand	Peak Score	Focus Ratio/Region Size	Annotation	Detailed Annotation	Distance to TSS	Nearest PromoterID	Entrez ID	Nearest Unigene	Nearest Refseq	Nearest Ensembl	Gene Name	Gene Alias	Gene Description	Gene Type	CONTROL Tag Count in given bp (54529192.0 Total, normalization factor = 0.18, effective total = 10000000)	CP27 Tag Count in given bp (54955932.0 Total, normalization factor = 0.18, effective total = 10000000)
	chr4-34434	chr4	136455524	136456024	+	10.6	500	Intergenic	Intergenic	-13987	NM_024452	269593	Mm.485824	NM_024452	ENSMUSG00000001089	Luzp1	2700072H04Rik|AI266952|Luzp|mFLJ00226	leucine zipper protein 1	protein-coding	10.64	2.55
	chr5-12720	chr5	30626325	30626825	+	9.9	500	Intergenic	Intergenic	-21361	NR_049199	100885838		NR_049199	ENSMUSG00000093710	Mir5625	Gm23930|mmu-mir-5625	microRNA 5625	ncRNA	9.9	2
	chr8-9981	chr8	85433871	85434371	+	9.54	500	Intergenic	Intergenic	-1280	NM_025722	66714	Mm.272748	NM_025722	ENSMUSG00000036934	4921524J17Rik	-	RIKEN cDNA 4921524J17 gene	protein-coding	9.54	2.18
	chr6-22249	chr6	6365755	6366398	+	9.54	643	intron (NR_136905, intron 3 of 3)	RLTR51A_Mm|LTR|ERVK?	117417	NR_136904	101056138	Mm.389085	NR_136904	ENSMUSG00000093482	Gm20619	-	predicted gene 20619	ncRNA	9.54	2.18
	chr13-8036	chr13	107494194	107494694	+	9.35	500	Intergenic	Intergenic	24622	NR_045083	105120	Mm.417700	NR_045083	ENSMUSG00000114780	AI197445	-	expressed sequence AI197445	ncRNA	9.35	2
	chr7-20257	chr7	3194482	3194982	+	9.35	500	Intergenic	Intergenic	-23894	NR_029640	100049710		NR_029640	ENSMUSG00000077815	Mir290a	Mir290|Mirn290|mir-290a|mmu-miR-290|mmu-mir-290a	microRNA 290a	ncRNA	9.35	1.82
	chr1-18048	chr1	177981364	177981864	+	9.35	500	Intergenic	Intergenic	-9784	NR_155538	545391	Mm.442974	NM_001034899	ENSMUSG00000091476	Catspere2	Gm16432|Gm30473	cation channel sperm associated auxiliary subunit epsilon 2	protein-coding	9.35	2.18
	chr2-18479	chr2	144895018	144895518	+	9.17	500	Intergenic	RMER19B|LTR|ERVK	71602	NM_025490	66328	Mm.45377	NM_025490	ENSMUSG00000027431	Scp2d1	1700010M22Rik	SCP2 sterol-binding domain containing 1	protein-coding	9.17	2
	chr10-13620	chr10	17114942	17115442	+	8.99	500	Intergenic	Intergenic	-19410	NR_038020	100504235	Mm.84044	NR_038020	ENSMUSG00000101969	Gm20125	-	predicted gene, 20125	ncRNA	8.99	2
	chr15-16199	chr15	37335678	37336178	+	8.8	500	intron (NM_026496, intron 10 of 15)	intron (NM_026496, intron 10 of 15)	-89626	NM_029113	74892	Mm.107630	NM_029113	ENSMUSG00000022288	4930447A16Rik	-	RIKEN cDNA 4930447A16 gene	protein-coding	8.8	2.18
	chr15-42199	chr15	58404357	58405075	+	8.8	718	Intergenic	LTR16E2|LTR|ERVL	-10752	NM_145959	210998	Mm.3224	NM_145959	ENSMUSG00000037119	Fam91a1	AV220772|BC033609|D15Ertd621e|SKIN|mKIAA0493	family with sequence similarity 91, member A1	protein-coding	8.8	1.82
	chr17-13765	chr17	17812654	17813154	+	8.8	500	Intergenic	RLTR14-int|LTR|ERV1	-17284	NR_029536	387230		NR_029536	ENSMUSG00000065396	Mir99b	Mirn99b|mmu-mir-99b	microRNA 99b	ncRNA	8.8	2.18
	chr8-17453	chr8	117865205	117866011	+	8.62	806	Intergenic	Intergenic	-63634	NM_026758	68533	Mm.181836	NM_026758	ENSMUSG00000031843	Mphosph6	1110001M01Rik|AA536809|C86426	M phase phosphoprotein 6	protein-coding	8.62	1.82
	chr18-5765	chr18	76053433	76053933	+	8.44	500	intron (NM_145356, intron 3 of 4)	intron (NM_145356, intron 3 of 4)	-5643	NM_001357506	207259	Mm.159332	NM_145356	ENSMUSG00000044646	Zbtb7c	B230208J24Rik|Kr-pok|Zbtb36	zinc finger and BTB domain containing 7C	protein-coding	8.44	1.82
	chr17-14987	chr17	86814416	86814916	+	8.25	500	intron (NM_010137, intron 6 of 15)	B4A|SINE|B4	60802	NM_010137	13819	Mm.1415	NM_010137	ENSMUSG00000024140	Epas1	HIF-2alpha|HIF2A|HLF|HRF|MOP2|bHLHe73	endothelial PAS domain protein 1	protein-coding	8.25	1.82
	chr5-31881	chr5	63840760	63841526	+	8.25	766	intron (NM_029554, intron 1 of 3)	intron (NM_029554, intron 1 of 3)	28648	NM_029554	76261	Mm.38143	NM_029554	ENSMUSG00000060512	0610040J01Rik	AI662686	RIKEN cDNA 0610040J01 gene	protein-coding	8.25	1.64
	chr15-17814	chr15	95205089	95205589	+	8.25	500	Intergenic	Intergenic	-56021	NR_015482	100043315	Mm.159041	NR_015482	ENSMUSG00000100603	LOC100043315	-	uncharacterized LOC100043315	ncRNA	8.25	1.82
	chr12-13513	chr12	80083726	80084226	+	8.25	500	Intergenic	Intergenic	29037	NM_007564	12192	Mm.235132	NM_007564	ENSMUSG00000021127	Zfp36l1	AW742437|AW743212|Berg36|Brf1|D530020L18Rik|ERF1|TIS11b|cMG1	zinc finger protein 36, C3H type-like 1	protein-coding	8.25	1.46
	chr12-13420	chr12	72105325	72105967	+	8.25	642	intron (NM_028687, intron 19 of 20)	intron (NM_028687, intron 19 of 20)	19807	NM_024205	104771	Mm.258935	NM_024205	ENSMUSG00000005078	Jkamp	1200003C05Rik|2310047L11Rik|Jamp	JNK1/MAPK8-associated membrane protein	protein-coding	8.25	1.82
	chr14-7134	chr14	64575304	64575804	+	8.07	500	Intergenic	Intergenic	-12561	NR_040709	268755	Mm.194050	NR_040709	ENSMUSG00000097545	Mir124a-1hg	A930011O12Rik|Rncr3|mir-124-1|mir-3078	Mir124-1 host gene (non-protein coding)	ncRNA	8.07	2
	chr15-17546	chr15	54786348	54786848	+	8.07	500	Intergenic	Intergenic	40688	NM_010930	18133	Mm.5167	NM_010930	ENSMUSG00000037362	Ccn3	C130088N23Rik|Nov	cellular communication network factor 3	protein-coding	8.07	1.64
	chr3-15887	chr3	119865498	119865998	+	8.07	500	Intergenic	Intergenic	-82360	NM_001310711	56195	Mm.29966	NM_019550	ENSMUSG00000028134	Ptbp2	Ptb2|brPTB|nPTB	polypyrimidine tract binding protein 2	protein-coding	8.07	1.64
	chr3-39349	chr3	33179052	33179832	+	8.07	780	Intergenic	ORR1D2|LTR|ERVL-MaLR	-36251	NM_001163516	58869	Mm.151332	NM_021483	ENSMUSG00000027674	Pex5l	1700016J08Rik|PXR2|Pex2|TRIP8b|pex5Rp	peroxisomal biogenesis factor 5-like	protein-coding	8.07	2
	chr15-20373	chr15	30897944	30898569	+	8.07	625	intron (NM_008729, intron 14 of 22)	intron (NM_008729, intron 14 of 22)	-140870	NR_045186	73784	Mm.66947	NR_045186	ENSMUSG00000115474	4930430F21Rik	-	RIKEN cDNA 4930430F21 gene	ncRNA	8.07	2
	chr4-18572	chr4	64627693	64628193	+	7.89	500	Intergenic	RMER13B|LTR|ERVK	-351340	NR_151546	102633436	Mm.411637	NR_151546		Gm11217	-	predicted gene 11217	ncRNA	7.89	1.64
	chr3-18426	chr3	115745106	115745606	+	7.89	500	Intergenic	Intergenic	-30301	NM_007901	13609	Mm.982	NM_007901	ENSMUSG00000045092	S1pr1	AI849002|Edg1|Lpb1|S1p|S1p1	sphingosine-1-phosphate receptor 1	protein-coding	7.89	1.82
	chr1-19930	chr1	51192298	51192798	+	7.89	500	Intergenic	Intergenic	-96578	NM_138741	20324	Mm.398690	NM_138741	ENSMUSG00000045954	Cavin2	Sdpr	caveolae associated 2	protein-coding	7.89	1.82
	chr15-40437	chr15	4546856	4547544	+	7.89	688	intron (NM_177355, intron 2 of 2)	intron (NM_177355, intron 2 of 2)	171709	NM_177355	239318	Mm.308996	NM_177355	ENSMUSG00000049148	Plcxd3	B130016O10Rik	phosphatidylinositol-specific phospholipase C, X domain containing 3	protein-coding	7.89	1.64
	chr3-23814	chr3	81034169	81034796	+	7.89	627	Intergenic	Intergenic	-1934	NM_019971	54635	Mm.331089	NM_019971	ENSMUSG00000028019	Pdgfc	1110064L01Rik|AI647969|PDGF-C|SCDGF|VEGF-E	platelet-derived growth factor, C polypeptide	protein-coding	7.89	1.64
	chr2-32867	chr2	147822741	147823391	+	7.7	650	Intergenic	RMER13A|LTR|ERVK	112373	NR_046014	381384	Mm.259809	NR_046014	ENSMUSG00000051986	A530006G24Rik	Gm1003	RIKEN cDNA A530006G24 gene	ncRNA	7.7	1.64
	chr12-12822	chr12	76592798	76593298	+	7.7	500	intron (NM_013675, intron 32 of 35)	intron (NM_013675, intron 32 of 35)	-45123	NR_046044	100504549	Mm.440349	NR_046044	ENSMUSG00000112388	AI463170	-	expressed sequence AI463170	ncRNA	7.7	1.46
	chr5-41492	chr5	142502474	142503135	+	7.7	661	intron (NM_001289588, intron 5 of 14)	ID_B1|SINE|B4	27272	NM_019943	56522	Mm.441372	NM_019943	ENSMUSG00000074817	Papolb	PAP|Paplob|Papola-ps|Papt|Plap-ps|Tpap	poly (A) polymerase beta (testis specific)	protein-coding	7.7	1.82
	chr12-19677	chr12	9891970	9892697	+	7.7	727	Intergenic	L1Md_F|LINE|L1	317891	NM_011859	23967	Mm.45055	NM_011859	ENSMUSG00000048387	Osr1	Odd1|Osr	odd-skipped related transcription factor 1	protein-coding	7.7	1.27
	chr15-24323	chr15	6634255	6634755	+	7.52	500	intron (NM_011815, intron 5 of 17)	intron (NM_011815, intron 5 of 17)	19798	NR_155272	102632231	Mm.444780	NR_155272		LOC102632231	-	uncharacterized LOC102632231	ncRNA	7.52	1.82
	chr18-7197	chr18	73816550	73817050	+	7.52	500	Intergenic	Intergenic	-1362	NR_157387	107029	Mm.36817	NM_145494	ENSMUSG00000024556	Me2	AW120568|D030040L20Rik|NAD-ME	malic enzyme 2, NAD(+)-dependent, mitochondrial	protein-coding	7.52	1.82
	chr13-11042	chr13	52580855	52581355	+	7.52	500	Intergenic	Intergenic	-2332	NM_001198977	20963	Mm.375031	NM_011518	ENSMUSG00000021457	Syk	Sykb	spleen tyrosine kinase	protein-coding	7.52	1.82
	chr7-17474	chr7	90746945	90747445	+	7.52	500	Intergenic	MTC-int|LTR|ERVL-MaLR	-271200	NM_026734	68472	Mm.289791	NM_026734	ENSMUSG00000030614	Tmem126b	1110001A23Rik	transmembrane protein 126B	protein-coding	7.52	1.82
	chr1-24109	chr1	120437693	120438193	+	7.52	500	Intergenic	Intergenic	67081	NM_010766	17167	Mm.1856	NM_010766	ENSMUSG00000026390	Marco	AI323439|Ly112|Scara2	macrophage receptor with collagenous structure	protein-coding	7.52	1.64
	chrX-7102	chrX	20548417	20548917	+	7.52	500	Intergenic	Intergenic	-1151	NM_009060	19733	Mm.2118	NM_009060	ENSMUSG00000023070	Rgn	AI265316|GNL|SMP30	regucalcin	protein-coding	7.52	1.82
	chr14-8274	chr14	62444125	62444625	+	7.52	500	intron (NM_172810, intron 3 of 16)	intron (NM_172810, intron 3 of 16)	11914	NM_001204340	239134	Mm.236557	NM_172810	ENSMUSG00000021933	Gucy1b2	B930025B03|GC-SB2	guanylate cyclase 1, soluble, beta 2	protein-coding	7.52	1.82
	chr5-25851	chr5	109986170	109986670	+	7.34	500	Intergenic	Intergenic	-10107	NM_145563	69504	Mm.441438	NM_145563	ENSMUSG00000066613	Zfp932	2310001H12Rik|Znf431	zinc finger protein 932	protein-coding	7.34	1.82
	chr7-18181	chr7	127162660	127163160	+	7.34	500	Intergenic	Intergenic	-25087	NM_009259	20737	Mm.283714	NM_009259	ENSMUSG00000051457	Spn	A630014B01Rik|Cd43|Galgp|Ly-48|Ly48	sialophorin	protein-coding	7.34	1.64
	chr16-9376	chr16	11782843	11783343	+	7.34	500	Intergenic	Intergenic	3391	NR_126430	73761	Mm.39183	NR_126430		4833415N18Rik	-	RIKEN cDNA 4833415N18 gene	ncRNA	7.34	1.64
	chr1-28650	chr1	166944627	166945127	+	7.34	500	Intergenic	ID_B1|SINE|B4	54853	NR_037988	100503962	Mm.216842	NR_037988	ENSMUSG00000102548	Gm16701	-	predicted gene, 16701	ncRNA	7.34	1.64
	chr7-26534	chr7	43711112	43711776	+	7.34	664	Intergenic	ZP3AR|Satellite|Satellite	-1123	NM_001039042	626834	Mm.389891	NM_001039042	ENSMUSG00000054046	Klk13	Egfbp-2|mGk-13	kallikrein related-peptidase 13	protein-coding	7.34	1.82
	chr1-24449	chr1	182793890	182794390	+	7.34	500	intron (NM_144796, intron 1 of 7)	intron (NM_144796, intron 1 of 7)	29244	NM_001356463	96935	Mm.331052	NM_144796	ENSMUSG00000038576	Susd4	AI848994|E430021N18Rik|N28096	sushi domain containing 4	protein-coding	7.34	1.82
	chr19-12149	chr19	26259086	26259711	+	7.34	625	Intergenic	Intergenic	-345762	NM_011416	67155	Mm.491146	NM_011416	ENSMUSG00000024921	Smarca2	2610209L14Rik|SNF2alpha|Snf2l2|brahma|brm	SWI/SNF related, matrix associated, actin dependent regulator of chromatin, subfamily a, member 2	protein-coding	7.34	1.82
	chr19-11662	chr19	28988494	28988994	+	7.34	500	Intergenic	RMER6A|LTR|ERVK	-1608	NM_001302443	67072	Mm.78875	NM_025950	ENSMUSG00000024780	Cdc37l1	2700033A15Rik|BB159850|Cdc37l|Harc	cell division cycle 37-like 1	protein-coding	7.34	1.46
	chr10-18903	chr10	126709832	126710332	+	7.34	500	TTS (NR_105841)	TTS (NR_105841)	309	NR_105841	102465224		NR_105841	ENSMUSG00000098756	Mir378d	Gm27650|mmu-mir-378d	microRNA 378d	ncRNA	7.34	1.46
	chr3-31981	chr3	80009306	80009972	+	7.15	666	Intergenic	Intergenic	123709	NM_133187	68659	Mm.427274	NM_133187	ENSMUSG00000027955	Gask1b	1110032E23Rik|2210419I08Rik|AV011458|Ened|Fam198b|GaskbB	golgi associated kinase 1B	protein-coding	7.15	1.64
	chr1-25547	chr1	194977499	194977999	+	7.15	500	promoter-TSS (NR_033564)	promoter-TSS (NR_033564)	-790	NR_033564	320400	Mm.417608	NR_033564	ENSMUSG00000097325	Gm16897	C030002c11rik	predicted gene, 16897	ncRNA	7.15	1.64
	chr4-32917	chr4	64911885	64912522	+	7.15	637	Intergenic	Intergenic	-211971	NM_021362	18491	Mm.317854	NM_021362	ENSMUSG00000028370	Pappa	8430414N03Rik|IGFBP-4ase|PAG1|PAPP-A	pregnancy-associated plasma protein A	protein-coding	7.15	1.09
	chr19-10848	chr19	32907255	32907755	+	7.15	500	Intergenic	MLT1E2|LTR|ERVL-MaLR	149928	NM_008960	19211	Mm.245395	NM_008960	ENSMUSG00000013663	Pten	2310035O07Rik|A130070J02Rik|AI463227|B430203M17Rik|MMAC1|PTENbeta|TEP1	phosphatase and tensin homolog	protein-coding	7.15	1.64
	chr3-20881	chr3	106787178	106787678	+	7.15	500	intron (NM_007651, intron 1 of 7)	intron (NM_007651, intron 1 of 7)	2721	NM_007651	12508	Mm.316861	NM_007651	ENSMUSG00000040747	Cd53	AI323659|Ox-44|Tspan25	CD53 antigen	protein-coding	7.15	1.09
	chr17-18158	chr17	47591971	47592471	+	7.15	500	intron (NM_001081635, intron 2 of 6)	(TTCC)n|Simple_repeat|Simple_repeat	-1246	NM_007632	12445	Mm.27291	NM_007632	ENSMUSG00000034165	Ccnd3	9230106B05Rik|AA682053|AL024085|AW146355|C78795	cyclin D3	protein-coding	7.15	1.64
	chr15-32894	chr15	25652618	25653118	+	7.15	500	intron (NM_019472, intron 1 of 40)	MTC|LTR|ERVL-MaLR	30318	NM_019472	17909	Mm.60590	NM_019472	ENSMUSG00000022272	Myo10	AW048724|D15Ertd600e|mKIAA0799|myosin-X	myosin X	protein-coding	7.15	1.64
	chrX-4400	chrX	164014795	164015295	+	6.97	500	intron (NM_181315, intron 1 of 7)	intron (NM_181315, intron 1 of 7)	12965	NM_181315	56078	Mm.180953	NM_181315	ENSMUSG00000031373	Car5b	7330410H16Rik|CAVB|Ca5b|CarVb|D730005F19Rik	carbonic anhydrase 5b, mitochondrial	protein-coding	6.97	1.64
	chr15-27008	chr15	103653768	103654268	+	6.97	500	Intergenic	Intergenic	-88937	NM_001289587	14663	Mm.219621	NM_008134	ENSMUSG00000022491	Glycam1	MC26|Sgp50|glyCAM-1	glycosylation dependent cell adhesion molecule 1	protein-coding	6.97	1.46
	chr14-9261	chr14	29136875	29137375	+	6.97	500	intron (NM_009785, intron 13 of 37)	intron (NM_009785, intron 13 of 37)	118917	NM_176920	319476	Mm.95780	NM_176920	ENSMUSG00000045776	Lrtm1	A930016D02Rik	leucine-rich repeats and transmembrane domains 1	protein-coding	6.97	1.64
	chr13-13254	chr13	95265281	95265781	+	6.97	500	Intergenic	CT-rich|Low_complexity|Low_complexity	-15195	NM_001346782	218461	Mm.100167	NM_172263	ENSMUSG00000021684	Pde8b	B230331L10Rik|C030047E14Rik	phosphodiesterase 8B	protein-coding	6.97	1.64
	chr10-20214	chr10	60829789	60830289	+	6.97	500	intron (NM_001359273, intron 1 of 15)	intron (NM_001359273, intron 1 of 15)	1542	NM_001359273	107449	Mm.290433	NM_029770	ENSMUSG00000020099	Unc5b	6330415E02Rik|A630020F16|D10Bwg0792e|Unc5h2	unc-5 netrin receptor B	protein-coding	6.97	1.46
	chr5-21334	chr5	65935334	65935834	+	6.97	500	Intergenic	Intergenic	-31540	NM_001081104	231252	Mm.140015	NM_001081104	ENSMUSG00000029205	Chrna9	2410015I05Rik|Acra9|EG666827|Gm8311	cholinergic receptor, nicotinic, alpha polypeptide 9	protein-coding	6.97	1.46
	chr11-26487	chr11	73839188	73839822	+	6.97	634	Intergenic	Intergenic	8618	NM_147008	259010	Mm.451672	NM_147008	ENSMUSG00000094488	Olfr393	MOR135-7	olfactory receptor 393	protein-coding	6.97	1.46
	chr6-20696	chr6	89608465	89608965	+	6.79	500	Intergenic	L1MC4|LINE|L1	-13063	NM_001167736	66098	Mm.20313	NM_025351	ENSMUSG00000030086	Chchd6	0710001P09Rik|1700021B03Rik|Micos25	coiled-coil-helix-coiled-coil-helix domain containing 6	protein-coding	6.79	1.64
	chr6-21117	chr6	5883066	5883566	+	6.79	500	intron (NM_001191023, intron 5 of 15)	intron (NM_001191023, intron 5 of 15)	94077	NR_040255	72249	Mm.443268	NR_040255	ENSMUSG00000085416	1700019G24Rik	-	RIKEN cDNA 1700019G24 gene	ncRNA	6.79	1.64
	chr15-24400	chr15	16403908	16404408	+	6.79	500	Intergenic	RMER6C|LTR|ERVK	-324757	NM_009869	12565	Mm.439758	NM_009869	ENSMUSG00000025370	Cdh9	-	cadherin 9	protein-coding	6.79	1.64
	chr17-19569	chr17	34437380	34437880	+	6.79	500	intron (NM_001001177, intron 6 of 19)	intron (NM_001001177, intron 6 of 19)	38307	NM_030746	632126	Mm.484958	NM_030746	ENSMUSG00000058435	Btnl4	Btn3a3|EG632126|NG11	butyrophilin-like 4	protein-coding	6.79	1.64
	chr10-23765	chr10	88574830	88575465	+	6.79	635	intron (NM_001252372, intron 2 of 28)	intron (NM_001252372, intron 2 of 28)	30005	NM_175418	109272	Mm.147208	NM_175418	ENSMUSG00000020061	Mybpc1	8030451F13Rik	myosin binding protein C, slow-type	protein-coding	6.79	1.64
	chr15-41691	chr15	48222294	48222794	+	6.79	500	intron (NM_001081391, intron 10 of 70)	L1_Mus4|LINE|L1	569445	NM_001081391	239420	Mm.309363	NM_001081391	ENSMUSG00000022311	Csmd3	4930500N14Rik|mKIAA1894	CUB and Sushi multiple domains 3	protein-coding	6.79	1.64
	chr9-14747	chr9	27771847	27772347	+	6.79	500	Intergenic	Intergenic	374885	NM_001305058	75469	Mm.45824	NM_029299	ENSMUSG00000031991	Spata19	1700001L23Rik|AV047838|spergen-1	spermatogenesis associated 19	protein-coding	6.79	1.46
	chr4-47508	chr4	6819757	6820462	+	6.79	705	intron (NM_145711, intron 3 of 8)	intron (NM_145711, intron 3 of 8)	170614	NM_145711	252838	Mm.435828	NM_145711	ENSMUSG00000041272	Tox	1700007F02Rik	thymocyte selection-associated high mobility group box	protein-coding	6.79	1.64
	chr10-22675	chr10	97558004	97558504	+	6.79	500	Intergenic	Intergenic	-7247	NM_008524	17022	Mm.18888	NM_008524	ENSMUSG00000036446	Lum	Ldc|SLRR2D	lumican	protein-coding	6.79	1.46
	chr5-21075	chr5	20715427	20715927	+	6.79	500	Intergenic	Intergenic	166447	NM_172992	68770	Mm.86410	NM_172992	ENSMUSG00000039987	Phtf2	1110054G21Rik|9530062N20Rik|AI447096|C77923	putative homeodomain transcription factor 2	protein-coding	6.79	1.46
	chr12-14573	chr12	15350663	15351291	+	6.79	628	Intergenic	L1_Mus1|LINE|L1	-300588	NR_045960	73972	Mm.107680	NR_045960	ENSMUSG00000113644	4930448C13Rik	-	RIKEN cDNA 4930448C13 gene	ncRNA	6.79	1.46
	chr13-16698	chr13	27739777	27740277	+	6.79	500	Intergenic	Lx9|LINE|L1	-23290	NM_011120	18814	Mm.3258	NM_011120	ENSMUSG00000021348	Prl7d1	Ghd19|PLF-RP|PRP|Plfr	prolactin family 7, subfamily d, member 1	protein-coding	6.79	1.46
	chr16-19929	chr16	38559674	38560309	+	6.79	635	intron (NM_001205286, intron 1 of 8)	intron (NM_001205286, intron 1 of 8)	1293	NM_001205286	67846	Mm.310476	NM_026407	ENSMUSG00000002845	Tmem39a	2610033C09Rik	transmembrane protein 39a	protein-coding	6.79	1.64
	chr17-18938	chr17	52784218	52784718	+	6.79	500	intron (NM_001031811, intron 3 of 15)	intron (NM_001031811, intron 3 of 15)	181759	NM_001031811	211468	Mm.399068	NM_001031811	ENSMUSG00000035580	Kcnh8	C130090D05Rik|ELK|ELK1|ELK3|Kv12.1	potassium voltage-gated channel, subfamily H (eag-related), member 8	protein-coding	6.79	1.64
	chr9-17215	chr9	55385731	55386359	+	6.6	628	intron (NM_172923, intron 3 of 10)	intron (NM_172923, intron 3 of 10)	59132	NM_172923	244886	Mm.24361	NM_172923	ENSMUSG00000032313	Tmem266	9630029F15|AI118078|HVRP1	transmembrane protein 266	protein-coding	6.6	1.27
	chr15-25224	chr15	82124352	82124852	+	6.6	500	intron (NM_028897, intron 28 of 30)	intron (NM_028897, intron 28 of 30)	-3320	NM_001326588	76457	Mm.440373	NM_172428	ENSMUSG00000068114	Ccdc134	2310042L06Rik|AW208859	coiled-coil domain containing 134	protein-coding	6.6	1.64
	chr8-12694	chr8	88106953	88107453	+	6.6	500	intron (NR_151771, intron 2 of 7)	PB1D9|SINE|Alu	11404	NR_151771	100040328	Mm.56398	NR_151771		Gm2716	4933416k23	predicted gene 2716	ncRNA	6.6	1.46
	chr10-22577	chr10	90356939	90357439	+	6.6	500	intron (NM_001359241, intron 11 of 25)	intron (NM_001359241, intron 11 of 25)	-218538	NM_001177397	77531	Mm.440605	NM_181398	ENSMUSG00000058589	Anks1b	AIDA-1|AIDA-1b|C030032C09Rik|E530015N03Rik|EB-1|Gm10937|Gm1555	ankyrin repeat and sterile alpha motif domain containing 1B	protein-coding	6.6	1.09
	chr11-24363	chr11	27721119	27721619	+	6.6	500	Intergenic	RMER17B|LTR|ERVK	862955	NM_181577	216613	Mm.93759	NM_181577	ENSMUSG00000032878	Ccdc85a	-	coiled-coil domain containing 85A	protein-coding	6.6	1.27
	chr15-28843	chr15	11018215	11018715	+	6.6	500	intron (NM_053077, intron 3 of 6)	L1M2|LINE|L1	17744	NM_053077	22293	Mm.138278	NM_053077	ENSMUSG00000022243	Slc45a2	Aim-1|Aim1|Dbr|Matp|Oca4|blanc-sale|bls|uw	solute carrier family 45, member 2	protein-coding	6.6	1.64
	chr19-11245	chr19	31651880	31652380	+	6.6	500	intron (NM_001013833, intron 1 of 17)	intron (NM_001013833, intron 1 of 17)	12240	NM_011160	19091	Mm.381170	NM_011160	ENSMUSG00000052920	Prkg1	AW125416|CGKI|Gm19690|Prkg1b|Prkgr1b	protein kinase, cGMP-dependent, type I	protein-coding	6.6	1.64
	chr3-24211	chr3	130380227	130380727	+	6.6	500	intron (NM_029838, intron 2 of 37)	MTC|LTR|ERVL-MaLR	199632	NM_198711	77018	Mm.91728	NM_029838	ENSMUSG00000058897	Col25a1	2700062B08Rik|CLAC-P	collagen, type XXV, alpha 1	protein-coding	6.6	1.64
	chr7-20671	chr7	73056321	73056821	+	6.6	500	Intergenic	Intergenic	45497	NR_046024	625243	Mm.261798	NR_046024	ENSMUSG00000108383	Gm6567	-	predicted gene 6567	ncRNA	6.6	1.27
	chr4-39068	chr4	99562128	99562753	+	6.6	625	Intergenic	Intergenic	-93859	NM_010425	15221	Mm.4758	NM_010425	ENSMUSG00000067261	Foxd3	CWH3|Genesis|Hfh2	forkhead box D3	protein-coding	6.6	1.64
	chr13-13356	chr13	112759935	112760435	+	6.6	500	Intergenic	Intergenic	-40592	NM_008903	19012	Mm.291029	NM_008247	ENSMUSG00000021759	Plpp1	Hic53|Hpic53|LPP-1|LPP1|PAP-2a|PAP2-alpha|PAP2a|Ppap2a|mPAP	phospholipid phosphatase 1	protein-coding	6.6	1.64
	chr1-28105	chr1	87118486	87118986	+	6.6	500	Intergenic	B1_Mur1|SINE|Alu	-6218	NM_007432	11648	Mm.377076	NM_007432	ENSMUSG00000036500	Akp3	Akp-3|IAP|dIAP	alkaline phosphatase 3, intestine, not Mn requiring	protein-coding	6.6	1.64
	chr17-44505	chr17	80558008	80558641	+	6.6	633	intron (NM_001360143, intron 2 of 9)	intron (NM_001360143, intron 2 of 9)	5510	NM_001033443	381113	Mm.329216	NM_001033443	ENSMUSG00000033966	Cdkl4	AU067824|Gm942	cyclin-dependent kinase-like 4	protein-coding	6.6	1.27
	chr1-29538	chr1	110977139	110977639	+	6.6	500	5' UTR (NM_001356415, exon 1 of 13)	5' UTR (NM_001356415, exon 1 of 13)	204	NM_001356415	227485	Mm.322070	NM_001081386	ENSMUSG00000047216	Cdh19	-	cadherin 19, type 2	protein-coding	6.6	1.64
	chr12-11940	chr12	8848364	8848864	+	6.6	500	Intergenic	Intergenic	-72693	NM_008640	17775	Mm.30071	NM_008640	ENSMUSG00000020585	Laptm4a	AA286466|LAPTM4|MTP|Mtrp|mKIAA0108	lysosomal-associated protein transmembrane 4A	protein-coding	6.6	1.64
	chr2-30415	chr2	27287286	27287786	+	6.6	500	intron (NR_133905, intron 12 of 29)	ID_B1|SINE|B4	-40233	NM_138665	192166	Mm.278467	NM_138665	ENSMUSG00000009614	Sardh	-	sarcosine dehydrogenase	protein-coding	6.6	1.46
	chr3-26950	chr3	125680175	125680675	+	6.42	500	intron (NM_022565, intron 6 of 13)	intron (NM_022565, intron 6 of 13)	258227	NM_011674	22239	Mm.306021	NM_011674	ENSMUSG00000032854	Ugt8a	AI850488|AW455908|Cgt|Ugt8|mCerGT	UDP galactosyltransferase 8A	protein-coding	6.42	1.46
	chr1-32936	chr1	164670525	164671025	+	6.42	500	Intergenic	Intergenic	-125888	NM_019759	56429	Mm.28935	NM_019759	ENSMUSG00000026574	Dpt	1810032B19Rik|5033416F05Rik|EQ-1|Eq1	dermatopontin	protein-coding	6.42	1.27
	chr15-27590	chr15	43555949	43556449	+	6.42	500	Intergenic	(TTCC)n|Simple_repeat|Simple_repeat	78970	NM_025736	66736	Mm.244512	NM_025736	ENSMUSG00000022337	Emc2	4921531G14Rik|AV060620|AW209495|Ttc35	ER membrane protein complex subunit 2	protein-coding	6.42	1.09
	chr5-24385	chr5	90758519	90759019	+	6.42	500	promoter-TSS (NM_009141)	promoter-TSS (NM_009141)	-529	NM_009141	20311	Mm.4660	NM_009141	ENSMUSG00000029371	Cxcl5	AMCF-II|Cxcl6|ENA-78|GCP-2|LIX|Scyb5|Scyb6	chemokine (C-X-C motif) ligand 5	protein-coding	6.42	1.46
	chr5-35681	chr5	5950278	5950938	+	6.42	660	Intergenic	Intergenic	-201291	NM_027399	70358	Mm.85429	NM_027399	ENSMUSG00000015652	Steap1	2410007B19Rik|Prss24|Steap	six transmembrane epithelial antigen of the prostate 1	protein-coding	6.42	1.46
	chr5-26883	chr5	72612195	72612695	+	6.42	500	intron (NM_007723, intron 4 of 8)	intron (NM_007723, intron 4 of 8)	-24895	NR_163693	545758	Mm.332426	NM_001024147	ENSMUSG00000060204	Gm5868	EG545758	predicted gene 5868	pseudo	6.42	1.46
	chr1-35035	chr1	190539815	190540315	+	6.42	500	Intergenic	L1MEd|LINE|L1	136417	NR_151624	433390	Mm.331295	NR_151624	ENSMUSG00000103644	Gm29678	-	predicted gene, 29678	ncRNA	6.42	1.46
	chr15-30199	chr15	93621961	93622461	+	6.42	500	Intergenic	Intergenic	-26309	NM_001033217	106042	Mm.150314	NM_001033217	ENSMUSG00000036158	Prickle1	1110058P22Rik|AW215793|Prickle|b2b019Clo|mpk1	prickle planar cell polarity protein 1	protein-coding	6.42	1.46
	chr13-14278	chr13	33104037	33104537	+	6.42	500	Intergenic	Lx2A|LINE|L1	20184	NM_173052	282663	Mm.314490	NM_173052	ENSMUSG00000051029	Serpinb1b	6330533H24Rik|EIB|Serpin1b1|ovalbumin	serine (or cysteine) peptidase inhibitor, clade B, member 1b	protein-coding	6.42	1.27
	chr7-25707	chr7	79817905	79818560	+	6.42	655	Intergenic	IMPB_01|Satellite|Satellite	7505	NM_008589	17293	Mm.31472	NM_008589	ENSMUSG00000030543	Mesp2	bHLHc6	mesoderm posterior 2	protein-coding	6.42	1.46
	chr1-31229	chr1	152908964	152909464	+	6.42	500	Intergenic	B1_Mur3|SINE|Alu	-6568	NM_001005507	226517	Mm.270775	NM_001005507	ENSMUSG00000042772	Smg7	9430023P16Rik|mKIAA0250	Smg-7 homolog, nonsense mediated mRNA decay factor (C. elegans)	protein-coding	6.42	1.46
	chr17-27919	chr17	15687639	15688139	+	6.42	500	Intergenic	B2_Mm2|SINE|B2	-17078	NM_007690	12648	Mm.8137	NM_007690	ENSMUSG00000023852	Chd1	4930525N21Rik|AI851787|AW555109	chromodomain helicase DNA binding protein 1	protein-coding	6.42	1.46
	chr11-31487	chr11	86412473	86412973	+	6.42	500	Intergenic	Intergenic	-55127	NM_001080931	327987	Mm.341886	NM_001080931	ENSMUSG00000034297	Med13	1110067M05Rik|D030023K18|Thrap1|Trap240	mediator complex subunit 13	protein-coding	6.42	1.46
	chr1-41997	chr1	13084779	13085418	+	6.42	639	Intergenic	Intergenic	42065	NM_001081209	383491	Mm.309380	NM_001081209	ENSMUSG00000042414	Prdm14	-	PR domain containing 14	protein-coding	6.42	1.27
	chr17-24048	chr17	58784456	58784956	+	6.42	500	Intergenic	Intergenic	206669	NM_027001	69239	Mm.246732	NM_027001	ENSMUSG00000024227	Pdzph1	2610034M16Rik|AV114557	PDZ and pleckstrin homology domains 1	protein-coding	6.42	1.27
	chr5-23983	chr5	29132547	29133047	+	6.24	500	Intergenic	Intergenic	-63196	NR_110371	56874	Mm.87352	NM_021470	ENSMUSG00000029130	Rnf32	1700009J01Rik|2700025B22Rik|4930542N22Rik|Lmbr2	ring finger protein 32	protein-coding	6.24	1.46
	chr13-15865	chr13	38312105	38312605	+	6.24	500	Intergenic	Intergenic	-33361	NM_007556	12161	Mm.385759	NM_007556	ENSMUSG00000039004	Bmp6	D13Wsu115e|Vgr1	bone morphogenetic protein 6	protein-coding	6.24	1.46
	chr2-32349	chr2	92886781	92887281	+	6.24	500	Intergenic	Intergenic	-28070	NM_030725	80976	Mm.33490	NM_030725	ENSMUSG00000027220	Syt13	5730409J20Rik|AI549909|mKIAA1427	synaptotagmin XIII	protein-coding	6.24	1.46
	chr3-27475	chr3	18774434	18774934	+	6.24	500	Intergenic	Lx8|LINE|L1	-294207	NR_040544	73959	Mm.60616	NR_040544	ENSMUSG00000102699	4930433B08Rik	-	RIKEN cDNA 4930433B08 gene	ncRNA	6.24	1.46
	chr13-14386	chr13	51296315	51296815	+	6.24	500	Intergenic	(GA)n|Simple_repeat|Simple_repeat	-93499	NR_132443	667728		NR_132443		Hist1h2al	EG667728	histone cluster 1, H2al	pseudo	6.24	1.27
	chr4-37143	chr4	154586908	154587535	+	6.24	627	intron (NM_001291026, intron 1 of 16)	intron (NM_001291026, intron 1 of 16)	36939	NR_151634	102634405		NR_151634		Gm13133	-	predicted gene 13133	ncRNA	6.24	1.09
	chr10-25177	chr10	91279027	91279527	+	6.24	500	Intergenic	Intergenic	-58658	NR_151510	102633753	Mm.416936	NR_151510		4930534H03Rik	-	RIKEN cDNA 4930534H03 gene	ncRNA	6.24	1.27
	chr12-14270	chr12	82572734	82573234	+	6.24	500	Intergenic	Intergenic	-43941	NM_015812	50779	Mm.126176	NM_015812	ENSMUSG00000021219	Rgs6	-	regulator of G-protein signaling 6	protein-coding	6.24	1.46
	chr9-22169	chr9	120360220	120360930	+	6.24	710	intron (NM_144557, intron 2 of 16)	intron (NM_144557, intron 2 of 16)	56502	NM_144557	245049	Mm.100936	NM_144557	ENSMUSG00000041794	Myrip	A230081N12Rik|Slac2-c|Slac2c	myosin VIIA and Rab interacting protein	protein-coding	6.24	1.46
	chr3-28785	chr3	145181907	145182407	+	6.24	500	Intergenic	Intergenic	63557	NM_025714	52184	Mm.259105	NM_025714	ENSMUSG00000028256	Odf2l	4733401D09Rik|9630045K08Rik|D3Ertd250e	outer dense fiber of sperm tails 2-like	protein-coding	6.24	1.09
	chr11-27496	chr11	72018588	72019088	+	6.24	500	Intergenic	Intergenic	18671	NM_053245	114230	Mm.95707	NM_053245	ENSMUSG00000040554	Aipl1	A930007I01Rik	aryl hydrocarbon receptor-interacting protein-like 1	protein-coding	6.24	1.27
	chr18-9159	chr18	67193998	67194498	+	6.24	500	intron (NM_177137, intron 5 of 11)	intron (NM_177137, intron 5 of 11)	-11111	NM_024190	67064	Mm.73777	NM_024190	ENSMUSG00000109901	Chmp1b	2810405I11Rik|Chmp1b1	charged multivesicular body protein 1B	protein-coding	6.24	1.09
	chr5-25141	chr5	26051306	26051806	+	6.24	500	Intergenic	Intergenic	-12051	NM_029376	75657	Mm.374273	NM_029376	ENSMUSG00000073119	Speer4a	1700027N01Rik|SPEER-4A	spermatogenesis associated glutamate (E)-rich protein 4A	protein-coding	6.24	1.27
	chr10-27133	chr10	119087059	119087559	+	6.24	500	Intergenic	RLTR42-int|LTR|ERVK	-5596	NR_045348	73400	Mm.416864	NR_045348	ENSMUSG00000100681	1700064J06Rik	-	RIKEN cDNA 1700064J06 gene	ncRNA	6.24	0.91
	chr11-35115	chr11	104209755	104210255	+	6.24	500	Intergenic	Intergenic	-21431	NM_001285456	17762	Mm.1287	NM_010838	ENSMUSG00000018411	Mapt	AI413597|AW045860|Mtapt|Tau	microtubule-associated protein tau	protein-coding	6.24	1.46
	chr2-34327	chr2	128865609	128866109	+	6.24	500	intron (NM_024237, intron 1 of 7)	intron (NM_024237, intron 1 of 7)	1927	NM_024237	70370	Mm.5107	NM_024237	ENSMUSG00000027386	Fbln7	1600015H20Rik|AI464334|TM14	fibulin 7	protein-coding	6.24	1.27
	chr5-25986	chr5	123975533	123976033	+	6.24	500	intron (NM_145070, intron 1 of 31)	intron (NM_145070, intron 1 of 31)	2155	NM_145070	29816	Mm.149954	NM_145070	ENSMUSG00000000915	Hip1r	AA410023|mKIAA0655	huntingtin interacting protein 1 related	protein-coding	6.24	1.46
	chr3-26328	chr3	64600350	64600850	+	6.24	500	Intergenic	Intergenic	-40782	NM_001104619	667069	Mm.484956	NM_001104619	ENSMUSG00000090581	Vmn2r6	EG620718|EG667069	vomeronasal 2, receptor 6	protein-coding	6.24	1.27
	chr11-31625	chr11	95159395	95159895	+	6.24	500	TTS (NR_040279)	TTS (NR_040279)	-13844	NM_007867	13394	Mm.439766	NM_007867	ENSMUSG00000020871	Dlx4	Dlx-4|Dlx7	distal-less homeobox 4	protein-coding	6.24	1.46
	chr5-30467	chr5	106427700	106428200	+	6.24	500	Intergenic	Intergenic	30216	NM_001005477	104382	Mm.271593	NM_001005477	ENSMUSG00000034384	Barhl2	E130309B19Rik|MBH1	BarH like homeobox 2	protein-coding	6.24	1.27
	chr5-23986	chr5	29478964	29479464	+	6.24	500	promoter-TSS (NM_019944)	promoter-TSS (NM_019944)	-744	NM_019944	15285	Mm.103760	NM_019944	ENSMUSG00000001566	Mnx1	HB9|Hlxb9|MNR2	motor neuron and pancreas homeobox 1	protein-coding	6.24	1.46
	chr19-12737	chr19	33222369	33222869	+	6.24	500	intron (NR_160911, intron 4 of 6)	intron (NR_160911, intron 4 of 6)	65507	NR_039552	100628575		NR_039552	ENSMUSG00000106278	Mir3970	mmu-mir-3970|mu-mir-3970	microRNA 3970	ncRNA	6.24	1.46
	chr14-11991	chr14	69182391	69182891	+	6.24	500	Intergenic	B1_Mus1|SINE|Alu	-8051	NM_010921	18095	Mm.3520	NM_010921	ENSMUSG00000022061	Nkx3-1	Bax|NKX3.1|NKX3A|Nkx-3.1|bagpipe	NK3 homeobox 1	protein-coding	6.24	1.27
	chr10-24187	chr10	3944634	3945134	+	6.24	500	intron (NM_001033253, intron 10 of 15)	intron (NM_001033253, intron 10 of 15)	-28191	NM_001170786	270685	Mm.184752	NM_172308	ENSMUSG00000040675	Mthfd1l	2410004L15Rik|AI647056|Fthfsdc1	methylenetetrahydrofolate dehydrogenase (NADP+ dependent) 1-like	protein-coding	6.24	1.46
	chr5-25633	chr5	90603982	90604482	+	6.05	500	intron (NM_028478, intron 9 of 10)	intron (NM_028478, intron 9 of 10)	36295	NM_028478	73246	Mm.30172	NM_028478	ENSMUSG00000029370	Rassf6	1600016B17Rik	Ras association (RalGDS/AF-6) domain family member 6	protein-coding	6.05	1.46
	chr11-36660	chr11	86199675	86200175	+	6.05	500	intron (NM_178309, intron 1 of 19)	RSINE1|SINE|B4	1268	NM_178309	237911	Mm.186143	NM_178309	ENSMUSG00000034329	Brip1	3110009N10Rik|8030460J03Rik|Bach1|FACJ|Fancj|OF	BRCA1 interacting protein C-terminal helicase 1	protein-coding	6.05	0.91
	chr8-14755	chr8	53657933	53658433	+	6.05	500	Intergenic	Intergenic	-19118	NM_146208	234258	Mm.281749	NM_146208	ENSMUSG00000039396	Neil3	AI449477|BC034753|C85903	nei like 3 (E. coli)	protein-coding	6.05	1.46
	chr17-26090	chr17	11106557	11107057	+	6.05	500	intron (NM_016694, intron 2 of 11)	intron (NM_016694, intron 2 of 11)	266448	NM_001317726	50873	Mm.311110	NM_016694	ENSMUSG00000023826	Prkn	Park2	parkin RBR E3 ubiquitin protein ligase	protein-coding	6.05	1.09
	chr8-16180	chr8	52142123	52142623	+	6.05	500	Intergenic	RLTR10D2|LTR|ERVK	-214238	NR_151738	330767	Mm.246790	NR_151738	ENSMUSG00000110013	1190028D05Rik	-	RIKEN cDNA 1190028D05 gene	ncRNA	6.05	1.46
	chr9-16138	chr9	24028806	24029306	+	6.05	500	Intergenic	Intergenic	-68962	NM_175678	319239	Mm.130824	NM_175678	ENSMUSG00000043659	Npsr1	9330128H10Rik|GPRA|Gpr154|MVTR|PGR14|VRR1	neuropeptide S receptor 1	protein-coding	6.05	1.46
	chr7-25059	chr7	13380435	13380935	+	6.05	500	Intergenic	Intergenic	-17470	NM_013877	29865	Mm.103669	NM_013877	ENSMUSG00000005649	Cabp5	-	calcium binding protein 5	protein-coding	6.05	1.09
	chr4-55365	chr4	96749313	96749945	+	6.05	632	intron (NM_001081284, intron 6 of 10)	MTE2a|LTR|ERVL-MaLR	35531	NM_001081284	620779	Mm.439625	NM_001081284	ENSMUSG00000078639	Gm12695	-	predicted gene 12695	protein-coding	6.05	1.46
	chr6-27682	chr6	142937273	142937773	+	6.05	500	intron (NM_011374, intron 1 of 4)	intron (NM_011374, intron 1 of 4)	26929	NM_011374	20449	Mm.260838	NM_011374	ENSMUSG00000030283	St8sia1	9330109E03Rik|GD3S|Sia-T|Siat8|Siat8a	ST8 alpha-N-acetyl-neuraminide alpha-2,8-sialyltransferase 1	protein-coding	6.05	1.46
	chr5-39286	chr5	35851722	35852222	+	6.05	500	intron (NM_177678, intron 13 of 19)	intron (NM_177678, intron 13 of 19)	-41347	NM_027373	70292	Mm.125167	NM_027373	ENSMUSG00000029094	Afap1	2600003E23Rik|9630044L16Rik|AI848729|Afap|mKIAA3018	actin filament associated protein 1	protein-coding	6.05	1.27
	chr1-34975	chr1	185200210	185200710	+	6.05	500	Intergenic	Intergenic	-3708	NM_001163754	98732	Mm.275841	NM_172649	ENSMUSG00000039318	Rab3gap2	1110059F07Rik|2010002H18Rik|5830469C09|AI851069|AW743433|RAB3-GAP150|mKIAA0839	RAB3 GTPase activating protein subunit 2	protein-coding	6.05	1.27
	chr10-28075	chr10	58651148	58651648	+	6.05	500	intron (NM_010100, intron 1 of 11)	intron (NM_010100, intron 1 of 11)	24298	NM_010100	13608	Mm.174523	NM_010100	ENSMUSG00000003227	Edar	ED1R|ED3|ED5|EDA-A1R|EDA3|dl	ectodysplasin-A receptor	protein-coding	6.05	1.46
	chr7-25759	chr7	82142882	82143382	+	6.05	500	Intergenic	RMER19B|LTR|ERVK	-31664	NM_001277954	20408	Mm.736	NM_017400	ENSMUSG00000030638	Sh3gl3	EEN-B2|SH3P13|Sh3d2c|Sh3d2c2	SH3-domain GRB2-like 3	protein-coding	6.05	1.46
	chr2-35113	chr2	20418890	20419390	+	6.05	500	intron (NM_001081006, intron 2 of 21)	intron (NM_001081006, intron 2 of 21)	-90907	NM_178059	208618	Mm.237935	NM_029895	ENSMUSG00000036617	Etl4	6620402G01Rik|9430077C05Rik|BC026657|E330027G05Rik|Etl-4|Skt	enhancer trap locus 4	protein-coding	6.05	1.46
	chr11-28838	chr11	86376457	86376957	+	6.05	500	Intergenic	Intergenic	-19111	NM_001080931	327987	Mm.341886	NM_001080931	ENSMUSG00000034297	Med13	1110067M05Rik|D030023K18|Thrap1|Trap240	mediator complex subunit 13	protein-coding	6.05	1.46
	chr3-35270	chr3	133257910	133258553	+	6.05	643	Intergenic	Intergenic	-23282	NM_001368752	77669	Mm.98630	NM_029953	ENSMUSG00000040969	Arhgef38	9130221D24Rik|D630013G24Rik	Rho guanine nucleotide exchange factor (GEF) 38	protein-coding	6.05	1.27
	chr12-14564	chr12	12223528	12224028	+	6.05	500	Intergenic	Intergenic	-38399	NM_001146119	76820	Mm.440802	NM_029758	ENSMUSG00000020589	Fam49a	2410157M17Rik|9630047E15|D12Ertd553e	family with sequence similarity 49, member A	protein-coding	6.05	1.27
	chr13-16578	chr13	18089376	18089876	+	6.05	500	intron (NR_046032, intron 4 of 5)	intron (NR_046032, intron 4 of 5)	10576	NR_046032	73992	Mm.159110	NR_046032	ENSMUSG00000113470	4930448F12Rik	-	RIKEN cDNA 4930448F12 gene	ncRNA	6.05	1.09
	chr7-24071	chr7	36402864	36403364	+	6.05	500	Intergenic	ID_B1|SINE|B4	-295004	NM_172298	243931	Mm.44141	NM_172298	ENSMUSG00000021217	Tshz3	A630038G13Rik|Tsh3|Zfp537|mKIAA1474|teashirt3	teashirt zinc finger family member 3	protein-coding	6.05	0.91
	chr12-14117	chr12	65388510	65389010	+	6.05	500	Intergenic	Intergenic	163243	NM_027614	70948	Mm.219475	NM_027614	ENSMUSG00000035560	Wdr20rt	4921538B03Rik|4930427E19Rik|Wdr20|Wdr20b	WD repeat domain 20, retrogene	protein-coding	6.05	1.46
	chr14-13647	chr14	105602031	105602531	+	6.05	500	Intergenic	Intergenic	12732	NR_102319	380930	Mm.427836	NR_102319	ENSMUSG00000115149	9330188P03Rik	Gm1589|mgt-6	RIKEN cDNA 9330188P03 gene	ncRNA	6.05	1.27
	chr7-28869	chr7	126397992	126398492	+	6.05	500	Intergenic	Intergenic	-1505	NM_010900	18020	Mm.1389	NM_010900	ENSMUSG00000030722	Nfatc2ip	D7Ertd304e|NIP45	nuclear factor of activated T cells, cytoplasmic, calcineurin dependent 2 interacting protein	protein-coding	6.05	1.46
	chr6-24623	chr6	143573439	143573939	+	6.05	500	Intergenic	Intergenic	-38181	NR_155418	75904	Mm.414916	NR_155418	ENSMUSG00000084971	4930579D09Rik	-	RIKEN cDNA 4930579D09 gene	ncRNA	6.05	1.09
	chr14-11064	chr14	9478186	9478686	+	6.05	500	Intergenic	Intergenic	-405659	NR_030680	100042415	Mm.235938	NR_030680	ENSMUSG00000089686	Mnd1-ps	Gm3833	Mnd1 retrotransposed pseudogene	pseudo	6.05	1.09
	chr2-36538	chr2	151626365	151626865	+	6.05	500	intron (NM_198214, intron 2 of 5)	intron (NM_198214, intron 2 of 5)	5978	NM_001291077	241727	Mm.39312	NM_198214	ENSMUSG00000027457	Snph	6430515A01|AW045671|AW556958|AW743098|mKIAA0374	syntaphilin	protein-coding	6.05	1.46
	chr1-36724	chr1	169913198	169913698	+	6.05	500	Intergenic	Intergenic	-15491	NM_001033185	78465	Mm.291078	NM_001033185	ENSMUSG00000070532	Ccdc190	1700084C01Rik	coiled-coil domain containing 190	protein-coding	6.05	1.46
	chr3-28595	chr3	128370439	128370939	+	6.05	500	Intergenic	Intergenic	-139084	NR_045704	402774	Mm.209170	NR_045704	ENSMUSG00000105816	D030025E07Rik	-	RIKEN cDNA D030025E07 gene	ncRNA	6.05	1.27
	chr11-27183	chr11	35065829	35066329	+	6.05	500	Intergenic	Intergenic	-55377	NM_011412	20564	Mm.478604	NM_011412	ENSMUSG00000056427	Slit3	Slil2|Slit1|b2b2362.1Clo	slit guidance ligand 3	protein-coding	6.05	1.46
	chr15-35776	chr15	45042570	45043070	+	6.05	500	Intergenic	RMER19C|LTR|ERVK	72114	NM_026200	67498	Mm.300079	NM_026200	ENSMUSG00000022342	Kcnv1	2700023A03Rik|vibe	potassium channel, subfamily V, member 1	protein-coding	6.05	1.27
	chr1-33078	chr1	175058291	175058791	+	6.05	500	TTS (NM_011880)	TTS (NM_011880)	-136722	NM_011825	23893	Mm.25760	NM_011825	ENSMUSG00000050069	Grem2	Gremlin2|Prdc	gremlin 2, DAN family BMP antagonist	protein-coding	6.05	1.46
	chr12-13985	chr12	35565528	35566028	+	6.05	500	Intergenic	Intergenic	-30789	NM_013464	11622	Mm.341377	NM_013464	ENSMUSG00000019256	Ahr	Ah|Ahh|Ahre|In|bHLHe76	aryl-hydrocarbon receptor	protein-coding	6.05	1.46
	chr8-14351	chr8	95976437	95976937	+	6.05	500	Intergenic	Intergenic	-88286	NM_010325	14719	Mm.230169	NM_010325	ENSMUSG00000031672	Got2	AL022787|FABP-pm|Got-2|Kyat4|mAspAT	glutamatic-oxaloacetic transaminase 2, mitochondrial	protein-coding	6.05	1.46
	chr6-25095	chr6	27829535	27830035	+	6.05	500	intron (NM_008174, intron 3 of 10)	intron (NM_008174, intron 3 of 10)	106965	NR_030420	735266		NR_030420	ENSMUSG00000076067	Mir592	Mirn592|mir-592|mmu-mir-592	microRNA 592	ncRNA	6.05	1.46
	chr1-32719	chr1	148419426	148419926	+	6.05	500	Intergenic	Intergenic	1502763	NM_001305632	18783	Mm.4186	NM_008869	ENSMUSG00000056220	Pla2g4a	Pla2g4|cPLA2|cPLA2-alpha|cPLA2alpha	phospholipase A2, group IVA (cytosolic, calcium-dependent)	protein-coding	6.05	1.46
	chr8-14677	chr8	32239767	32240267	+	6.05	500	Intergenic	MTC|LTR|ERVL-MaLR	88122	NR_046039	666589	Mm.367675	NR_046039		Gm8179	EG666589	predicted gene 8179	ncRNA	6.05	1.46
	chr14-11707	chr14	23013457	23013957	+	6.05	500	intron (NM_028275, intron 6 of 6)	intron (NM_028275, intron 6 of 6)	80864	NR_033550	791307	Mm.364384	NR_033550	ENSMUSG00000068680	Gm10248	-	predicted gene 10248	ncRNA	6.05	1.46
	chr13-15276	chr13	78487579	78488079	+	6.05	500	Intergenic	Intergenic	-288956	NM_010151	13865	Mm.439653	NM_010151	ENSMUSG00000069171	Nr2f1	COUP-TF1|COUP-TFI|COUPTFA|EAR-3|EAR3|Erbal3|SVP44|Tcfcoup1	nuclear receptor subfamily 2, group F, member 1	protein-coding	6.05	1.27
	chr14-11439	chr14	71406821	71407321	+	6.05	500	Intergenic	Lx3B|LINE|L1	155798	NR_046076	100043132	Mm.399336	NR_046075	ENSMUSG00000115139	Gm4251	-	predicted gene 4251	ncRNA	6.05	1.09
	chr2-33856	chr2	73744795	73745295	+	6.05	500	intron (NM_001113246, intron 1 of 12)	intron (NM_001113246, intron 1 of 12)	30301	NM_001166603	108699	Mm.257073	NM_029716	ENSMUSG00000056486	Chn1	0610007I19Rik|0710001E19Rik|1700112L09Rik|2900046J01Rik|AI413815|ARHGAP2	chimerin 1	protein-coding	6.05	1.27
	chr5-26163	chr5	149272799	149273299	+	6.05	500	intron (NM_001308462, intron 2 of 3)	intron (NM_001308462, intron 2 of 3)	8045	NM_001308462	11690	Mm.19844	NM_009663	ENSMUSG00000060063	Alox5ap	Flap	arachidonate 5-lipoxygenase activating protein	protein-coding	6.05	1.46
	chr14-10962	chr14	86757899	86758399	+	6.05	500	intron (NM_019670, intron 27 of 27)	intron (NM_019670, intron 27 of 27)	383075	NM_019670	56419	Mm.440585	NM_019670	ENSMUSG00000022021	Diaph3	4930417P13Rik|Dia2|Diap3|Drf3|p134MDia2	diaphanous related formin 3	protein-coding	6.05	1.46
	chr17-23280	chr17	88911483	88911983	+	6.05	500	Intergenic	Intergenic	-119719	NM_001364898	16867	Mm.1644	NM_013582	ENSMUSG00000024107	Lhcgr	Gpcr19-rs1|LH-R|LH/CG-R|LSH-R|Lhr	luteinizing hormone/choriogonadotropin receptor	protein-coding	6.05	1.46
	chr1-34306	chr1	129113669	129114169	+	6.05	500	Intergenic	Intergenic	-159385	NM_172485	210417	Mm.380518	NM_172485	ENSMUSG00000042581	Thsd7b	1700074E13Rik|B930082A18|D130067I03Rik	thrombospondin, type I, domain containing 7B	protein-coding	6.05	1.46
	chr6-24997	chr6	18945609	18946109	+	6.05	500	Intergenic	Intergenic	79541	NM_001167757	75196	Mm.67665	NM_029202	ENSMUSG00000029517	Ankrd7	4930532L20Rik|AV278427	ankyrin repeat domain 7	protein-coding	6.05	1.27
	chr15-36957	chr15	89024992	89025492	+	5.87	500	intron (NM_031260, intron 21 of 26)	intron (NM_031260, intron 21 of 26)	-34484	NM_001002005	406218	Mm.483059	NM_001002005	ENSMUSG00000058441	Panx2	-	pannexin 2	protein-coding	5.87	1.46
	chr1-44952	chr1	6379078	6379578	+	5.87	500	intron (NM_001195732, intron 1 of 4)	intron (NM_001195732, intron 1 of 4)	19997	NM_001195732	620393	Mm.388992	NM_001195732	ENSMUSG00000087247	Alkal1	EG620393|Fam150a	ALK and LTK ligand 1	protein-coding	5.87	1.46
	chr3-32476	chr3	114426666	114427166	+	5.87	500	Intergenic	Lx3A|LINE|L1	396376	NM_007729	12814	Mm.209715	NM_007729	ENSMUSG00000027966	Col11a1	C530001D20Rik|cho	collagen, type XI, alpha 1	protein-coding	5.87	1.46
	chr15-38249	chr15	40019268	40019768	+	5.87	500	Intergenic	RLTR41A2|LTR|ERV1	-25670	NR_155348	102636079	Mm.421381	NR_155348	ENSMUSG00000115142	Gm33251	-	predicted gene, 33251	ncRNA	5.87	1.27
	chr15-39967	chr15	93616616	93617116	+	5.87	500	Intergenic	L1_Mus3|LINE|L1	-20964	NM_001033217	106042	Mm.150314	NM_001033217	ENSMUSG00000036158	Prickle1	1110058P22Rik|AW215793|Prickle|b2b019Clo|mpk1	prickle planar cell polarity protein 1	protein-coding	5.87	1.46
	chr7-25775	chr7	83195447	83195947	+	5.87	500	Intergenic	Intergenic	47227	NM_177895	330578	Mm.5796	NM_177895	ENSMUSG00000053528	A530021J07Rik	-	Riken cDNA A530021J07 gene	protein-coding	5.87	1.46
	chr18-9341	chr18	22984584	22985084	+	5.87	500	intron (NM_001361224, intron 1 of 10)	G-rich|Low_complexity|Low_complexity	53829	NM_001161483	319211	Mm.209896	NM_199024	ENSMUSG00000041923	Nol4	1700013J13Rik|4930568N03Rik|Gm1262	nucleolar protein 4	protein-coding	5.87	1.46
	chr7-25159	chr7	26586170	26586670	+	5.87	500	Intergenic	L1_Mur2|LINE|L1	25658	NM_134231	171265	Mm.377217	NM_134231	ENSMUSG00000091924	Vmn1r185	V1re12	vomeronasal 1 receptor 185	protein-coding	5.87	1.46
	chr1-37172	chr1	15147446	15147946	+	5.87	500	Intergenic	MamGypLTR1c|LTR|Gypsy	-139229	NM_001098528	98741	Mm.156081	NM_001033195	ENSMUSG00000092083	Kcnb2	9630047L19Rik|BB130875|Kv2.2	potassium voltage gated channel, Shab-related subfamily, member 2	protein-coding	5.87	1.46
	chr15-38453	chr15	44115010	44115510	+	5.87	500	Intergenic	L1_Mus3|LINE|L1	-80875	NM_013696	22045	Mm.309350	NM_013696	ENSMUSG00000038760	Trhr	TRH-R1	thyrotropin releasing hormone receptor	protein-coding	5.87	1.46
	chr16-12454	chr16	13730284	13730784	+	5.87	500	promoter-TSS (NM_001291009)	promoter-TSS (NM_001291009)	-50	NR_110990	26565	Mm.4214	NM_011987	ENSMUSG00000022683	Pla2g10	GX sPLA2|PLA2GX|sPLA2-X	phospholipase A2, group X	protein-coding	5.87	1.46
	chr18-9429	chr18	39505707	39506207	+	5.87	500	intron (NM_001361212, intron 1 of 8)	intron (NM_001361212, intron 1 of 8)	13464	NM_001361212	14815	Mm.129481	NM_008173	ENSMUSG00000024431	Nr3c1	GR|Grl-1|Grl1	nuclear receptor subfamily 3, group C, member 1	protein-coding	5.87	1.46
	chr1-35304	chr1	38700178	38700678	+	5.87	500	Intergenic	Intergenic	-73184	NM_001290814	16764	Mm.336679	NM_010678	ENSMUSG00000037138	Aff3	3222402O04Rik|A730046J16|LAF-4|Laf4	AF4/FMR2 family, member 3	protein-coding	5.87	1.46
	chr17-26291	chr17	17433058	17433558	+	5.87	500	intron (NM_025681, intron 2 of 5)	intron (NM_025681, intron 2 of 5)	30622	NM_025681	66643	Mm.268018	NM_025681	ENSMUSG00000047786	Lix1	5730466L18Rik	limb and CNS expressed 1	protein-coding	5.87	1.46
	chr17-29605	chr17	88511728	88512228	+	5.87	500	Intergenic	ID_B1|SINE|B4	-18146	NM_028658	73825	Mm.271817	NM_028658	ENSMUSG00000034709	Ppp1r21	1110018J12Rik|AI426045|AW550781|Ccdc128|Klraq1	protein phosphatase 1, regulatory subunit 21	protein-coding	5.87	1.46
	chr16-14339	chr16	63921138	63921638	+	5.87	500	Intergenic	RMER19B|LTR|ERVK	-57213	NM_001362452	13837	Mm.1977	NM_010140	ENSMUSG00000052504	Epha3	AW492086|Cek4|EK4|ETK1|End3|Hek|Hek4|Mek4|Tyro4	Eph receptor A3	protein-coding	5.87	1.46
	chr4-33679	chr4	91090189	91090689	+	5.87	500	Intergenic	Intergenic	281616	NM_207686	15569	Mm.318042	NM_010486	ENSMUSG00000008489	Elavl2	Hub|mel-N1	ELAV like RNA binding protein 1	protein-coding	5.87	1.27
	chr18-8990	chr18	35504359	35504859	+	5.87	500	Intergenic	Intergenic	-5684	NM_030749	81500	Mm.291482	NM_030749	ENSMUSG00000024357	Sil1	1810057E01Rik|AI042831|wz	endoplasmic reticulum chaperone SIL1 homolog (S. cerevisiae)	protein-coding	5.87	1.46
	chr6-30795	chr6	53957752	53958252	+	5.87	500	intron (NM_001289713, intron 3 of 12)	intron (NM_001289713, intron 3 of 12)	20671	NM_027749	71287	Mm.158654	NM_027749	ENSMUSG00000052955	Cpvl	4933436L16Rik|HVLP	carboxypeptidase, vitellogenic-like	protein-coding	5.87	1.46
	chr10-27951	chr10	40312750	40313250	+	5.87	500	Intergenic	RSINE1|SINE|B4	-10812	NM_009665	11702	Mm.253533	NM_009665	ENSMUSG00000075232	Amd1	AdoMetDC|Amd-1|SAMDC|SAMDC 1|adoMetDC1	S-adenosylmethionine decarboxylase 1	protein-coding	5.87	1.27
	chr15-36432	chr15	63194472	63194972	+	5.87	500	Intergenic	Intergenic	284886	NR_045279	432958	Mm.255105	NR_045279	ENSMUSG00000115520	Gm20740	-	predicted gene, 20740	ncRNA	5.87	1.46
	chr2-37523	chr2	46921820	46922320	+	5.87	500	Intergenic	L1_Mur3|LINE|L1	1225465	NR_040497	69405	Mm.396184	NR_040497	ENSMUSG00000086202	1700019E08Rik	-	RIKEN cDNA 1700019E08 gene	ncRNA	5.87	1.46
	chr12-15665	chr12	56348221	56348721	+	5.87	500	Intergenic	Intergenic	-2577	NM_145442	217588	Mm.25656	NM_145442	ENSMUSG00000021028	Mbip	4933408E06Rik	MAP3K12 binding inhibitory protein 1	protein-coding	5.87	1.27
	chr3-27431	chr3	10377275	10377775	+	5.87	500	intron (NM_025519, intron 1 of 4)	Lx5|LINE|L1	10552	NM_025519	66371	Mm.366147	NM_025519	ENSMUSG00000027536	Chmp4c	2010012P02Rik|2210015K02Rik|2310010I16Rik|Shax3|Snf7-3	charged multivesicular body protein 4C	protein-coding	5.87	1.46
	chr2-38721	chr2	145225632	145226132	+	5.87	500	intron (NM_001356497, intron 1 of 16)	intron (NM_001356497, intron 1 of 16)	-16729	NM_053195	94249	Mm.217171	NM_053195	ENSMUSG00000063873	Slc24a3	NCKX3	solute carrier family 24 (sodium/potassium/calcium exchanger), member 3	protein-coding	5.87	1.46
	chr3-32148	chr3	89623515	89624015	+	5.87	500	intron (NM_080466, intron 3 of 7)	MLT1J|LTR|ERVL-MaLR	-91257	NM_001038587	56417	Mm.316628	NM_019655	ENSMUSG00000027951	Adar	AV242451|Adar1|Adar1p110|Adar1p150|DRADA|mZaADAR	adenosine deaminase, RNA-specific	protein-coding	5.87	1.46
	chr7-25184	chr7	29130882	29131382	+	5.87	500	Intergenic	RLTR31D_MM|LTR|ERVK	-3801	NM_145149	233046	Mm.465324	NM_145149	ENSMUSG00000030589	Rasgrp4	-	RAS guanyl releasing protein 4	protein-coding	5.87	1.46
	chr6-26399	chr6	16045612	16046112	+	5.87	500	Intergenic	MTEb-int|LTR|ERVL-MaLR	325201	NM_175088	16543	Mm.1314	NM_175088	ENSMUSG00000041390	Mdfic	Kdt1|Mdfid	MyoD family inhibitor domain containing	protein-coding	5.87	1.46
	chr16-13561	chr16	64773949	64774449	+	5.87	500	Intergenic	Lx8b|LINE|L1	-3260	NM_026273	67609	Mm.212157	NM_026273	ENSMUSG00000059920	4930453N24Rik	AI649104|din	RIKEN cDNA 4930453N24 gene	protein-coding	5.87	1.27
	chr9-23476	chr9	106270310	106270810	+	5.87	500	Intergenic	Intergenic	-10501	NM_027354	70235	Mm.23054	NM_027354	ENSMUSG00000023345	Poc1a	2510040D07Rik|Wdr51a|cha	POC1 centriolar protein A	protein-coding	5.87	1.46
	chr5-27463	chr5	135961537	135962037	+	5.87	500	intron (NM_001160366, intron 10 of 10)	intron (NM_001160366, intron 10 of 10)	12689	NM_001160366	109267	Mm.332750	NM_001160366	ENSMUSG00000029699	Ssc4d	C330016E03Rik|S4D-SRCRB|SRCRB-S4D|Srcrb4d	scavenger receptor cysteine rich family, 4 domains	protein-coding	5.87	1.46
	chr19-13828	chr19	21346617	21347117	+	5.87	500	Intergenic	RLTR17|LTR|ERVK	74589	NM_009551	22682	Mm.292405	NM_009551	ENSMUSG00000024750	Zfand5	2310057A04Rik|5830475F03Rik|AA415485|Za20d2|Zfp216	zinc finger, AN1-type domain 5	protein-coding	5.87	1.46
	chr6-26940	chr6	52474110	52474610	+	5.87	500	Intergenic	Intergenic	-18091	NR_046049	74304	Mm.490579	NR_046049	ENSMUSG00000107895	1700094M24Rik	-	RIKEN cDNA 1700094M24 gene	ncRNA	5.87	1.46
	chr6-37793	chr6	12832488	12832988	+	5.87	500	Intergenic	Intergenic	-83485	NM_001164805	330267	Mm.11989	NM_001164805	ENSMUSG00000032625	Thsd7a	Gm837	thrombospondin, type I, domain containing 7A	protein-coding	5.87	1.46
	chr13-17552	chr13	13195335	13195835	+	5.87	500	Intergenic	L1_Mus3|LINE|L1	12869	NM_181852	107849	Mm.392548	NM_181852	ENSMUSG00000055360	Prl2c5	Ghd3|MRP-4|Mrpplf4|PLF-4	prolactin family 2, subfamily c, member 5	protein-coding	5.87	1.46
	chr2-33404	chr2	28592781	28593281	+	5.87	500	Intergenic	Intergenic	-9752	NM_001290484	70239	Mm.274120	NM_148928	ENSMUSG00000026816	Gtf3c5	2700084A09Rik|TFIIIC63|TFiiiC2-63	general transcription factor IIIC, polypeptide 5	protein-coding	5.87	1.46
	chr10-35252	chr10	83176894	83177394	+	5.87	500	intron (NM_021439, intron 2 of 2)	intron (NM_021439, intron 2 of 2)	160673	NM_177388	338365	Mm.67073	NM_177388	ENSMUSG00000034591	Slc41a2	A230035L05Rik|SLC41A1-L1	solute carrier family 41, member 2	protein-coding	5.87	1.46
	chr2-38379	chr2	119504827	119505327	+	5.87	500	Intergenic	ID_B1|SINE|B4	-27390	NM_026574	68142	Mm.330496	NM_026574	ENSMUSG00000034154	Ino80	2310079N15Rik|4632409L19Rik|Inoc1	INO80 complex subunit	protein-coding	5.87	1.46
	chr1-35181	chr1	15944302	15944802	+	5.87	500	Intergenic	Intergenic	-51830	NM_001033288	226866	Mm.131665	NM_001033288	ENSMUSG00000032719	Sbspon	Gm106|Rpesp	somatomedin B and thrombospondin, type 1 domain containing	protein-coding	5.87	1.46
	chr16-13465	chr16	42454601	42455101	+	5.87	500	Intergenic	ID4_|SINE|ID	-114200	NM_008083	14432	Mm.1222	NM_008083	ENSMUSG00000047261	Gap43	B-50|Basp2|GAP-43	growth associated protein 43	protein-coding	5.87	1.46
	chr18-9335	chr18	15400811	15401311	+	5.87	500	intron (NM_001308641, intron 1 of 4)	intron (NM_001308641, intron 1 of 4)	1938	NM_001308647	11829	Mm.250786	NM_009700	ENSMUSG00000024411	Aqp4	WCH4	aquaporin 4	protein-coding	5.87	1.27
	chr3-49464	chr3	123418199	123418843	+	5.87	644	Intergenic	Intergenic	-28392	NM_008939	19142	Mm.9431	NM_008939	ENSMUSG00000027978	Prss12	Bssp-3|motopsin	protease, serine 12 neurotrypsin (motopsin)	protein-coding	5.87	1.27
	chr4-34380	chr4	130229046	130229546	+	5.87	500	Intergenic	B4A|SINE|B4	-7001	NM_001034872	332942	Mm.387701	NM_001034872	ENSMUSG00000023120	Ldc1	Gm853	leucine decarboxylase 1	protein-coding	5.87	1.46
	chr19-14655	chr19	27575303	27575803	+	5.87	500	Intergenic	Intergenic	145516	NR_027987	107372	Mm.17942	NM_175354		C030016D13Rik	AW413347	RIKEN cDNA C030016D13 gene	ncRNA	5.87	1.46
	chr11-39821	chr11	120513163	120513663	+	5.87	500	Intergenic	Intergenic	-17314	NM_008101	14527	Mm.22329	NM_008101	ENSMUSG00000025127	Gcgr	GR	glucagon receptor	protein-coding	5.87	1.27
	chr18-9664	chr18	81753410	81753910	+	5.87	500	Intergenic	Lx8|LINE|L1	238420	NR_039589	100628596		NR_039589	ENSMUSG00000093036	Mir5127	mmu-mir-5127|mu-mir-5127	microRNA 5127	ncRNA	5.87	1.46
	chr1-37010	chr1	191410720	191411220	+	5.87	500	Intergenic	Intergenic	-13929	NM_144880	226849	Mm.205569	NM_144880	ENSMUSG00000026626	Ppp2r5a	PR61alpha	protein phosphatase 2, regulatory subunit B', alpha	protein-coding	5.87	1.46
	chr19-14915	chr19	45672246	45672746	+	5.87	500	Intergenic	RMER19A|LTR|ERVK	-12303	NM_013907	30838	Mm.254739	NM_013907	ENSMUSG00000040913	Fbxw4	Dac|Fbw4|SHFM3|SHSF3|dactylin|dactylyn	F-box and WD-40 domain protein 4	protein-coding	5.87	1.46
	chr15-39784	chr15	87493822	87494322	+	5.87	500	Intergenic	Intergenic	-50227	NM_001252310	106014	Mm.244319	NM_134096	ENSMUSG00000054863	Tafa5	Fam19a5|Tafa-5|Tara-5	TAFA chemokine like family member 5	protein-coding	5.87	1.27
	chr9-16979	chr9	24183673	24184173	+	5.69	500	intron (NM_175678, intron 3 of 9)	ORR1E|LTR|ERVL-MaLR	85905	NM_175678	319239	Mm.130824	NM_175678	ENSMUSG00000043659	Npsr1	9330128H10Rik|GPRA|Gpr154|MVTR|PGR14|VRR1	neuropeptide S receptor 1	protein-coding	5.69	1.27
	chr13-19204	chr13	81399732	81400232	+	5.69	500	intron (NM_054053, intron 77 of 89)	Lx5c|LINE|L1	233162	NM_054053	110789	Mm.288694	NM_054053	ENSMUSG00000069170	Adgrv1	Frings|Gpr98|Mass1|Mgr1|VLGR1	adhesion G protein-coupled receptor V1	protein-coding	5.69	1.09
	chr9-18371	chr9	88329106	88329606	+	5.69	500	intron (NM_011851, intron 1 of 8)	intron (NM_011851, intron 1 of 8)	1747	NM_011851	23959	Mm.244235	NM_011851	ENSMUSG00000032420	Nt5e	2210401F01Rik|5'-NT|AI447961|CD73|NT|Nt5|eNT	5' nucleotidase, ecto	protein-coding	5.69	1.27
	chr1-40969	chr1	138635838	138636338	+	5.69	500	Intergenic	Lx9|LINE|L1	-16331	NM_001311148	59125	Mm.143817	NM_021605	ENSMUSG00000026393	Nek7	2810460C19Rik|AU020186	NIMA (never in mitosis gene a)-related expressed kinase 7	protein-coding	5.69	1.27
	chr2-45119	chr2	44501624	44502124	+	5.69	500	Intergenic	Intergenic	359748	NM_172662	227835	Mm.314312	NM_172662	ENSMUSG00000036890	Gtdc1	E330008O22Rik	glycosyltransferase-like domain containing 1	protein-coding	5.69	1.09
	chr1-36098	chr1	98055492	98055992	+	5.69	500	intron (NM_001357127, intron 1 of 25)	intron (NM_001357127, intron 1 of 25)	-7949	NR_037993	78603	Mm.442597	NR_037993	ENSMUSG00000089706	B230216N24Rik	-	RIKEN cDNA B230216N24 gene	ncRNA	5.69	1.27
	chr3-30249	chr3	107932356	107932856	+	5.69	500	promoter-TSS (NM_026672)	promoter-TSS (NM_026672)	-789	NM_026672	68312	Mm.458189	NM_026672	ENSMUSG00000004035	Gstm7	0610005A07Rik|AI894236|Cd203c	glutathione S-transferase, mu 7	protein-coding	5.69	1.27
	chr1-37405	chr1	45082327	45082827	+	5.69	500	Intergenic	L1Md_F2|LINE|L1	-228961	NM_009930	12825	Mm.249555	NM_009930	ENSMUSG00000026043	Col3a1	AW550625|Col3a-1|Tsk-2|Tsk2	collagen, type III, alpha 1	protein-coding	5.69	1.27
	chr13-18305	chr13	105642793	105643293	+	5.69	500	Intergenic	L1_Mus3|LINE|L1	199350	NM_008308	15550	Mm.4716	NM_008308	ENSMUSG00000021721	Htr1a	Gpcr18	5-hydroxytryptamine (serotonin) receptor 1A	protein-coding	5.69	0.91
	chr4-31537	chr4	94710180	94710680	+	5.69	500	Intergenic	Lx3A|LINE|L1	-28859	NM_013690	21687	Mm.14313	NM_013690	ENSMUSG00000006386	Tek	AA517024|Cd202b|Hyk|STK1|Tie-2|Tie2	TEK receptor tyrosine kinase	protein-coding	5.69	1.27
	chr12-16485	chr12	36867640	36868140	+	5.69	500	Intergenic	PB1D10|SINE|Alu	51685	NR_039558	100628578		NR_039558	ENSMUSG00000092998	Mir5099	mmu-mir-5099|mu-mir-5099	microRNA 5099	ncRNA	5.69	0.55
	chr1-40836	chr1	131619982	131620482	+	5.69	500	Intergenic	Intergenic	-18082	NM_007799	13034	Mm.230249	NM_007799	ENSMUSG00000004552	Ctse	A430072O03Rik|C920004C08Rik|CE|CatE	cathepsin E	protein-coding	5.69	0.91
	chr4-38254	chr4	76402723	76403223	+	5.69	500	intron (NR_160919, intron 10 of 39)	B3|SINE|B2	-58730	NM_001352629	19266	Mm.184021	NM_011211	ENSMUSG00000028399	Ptprd	1110002J03Rik|3000002J10Rik|B230219D21Rik|R-PTP-delta	protein tyrosine phosphatase, receptor type, D	protein-coding	5.69	1.09
	chr9-18328	chr9	80889715	80890215	+	5.69	500	Intergenic	Intergenic	-424527	NM_022016	63859	Mm.422780	NM_022016	ENSMUSG00000032343	Impg1	A930015H12Rik|IMP150|SPACR	interphotoreceptor matrix proteoglycan 1	protein-coding	5.69	0.91
	chr9-17770	chr9	20525119	20525619	+	5.69	500	Intergenic	Lx8b|LINE|L1	-3950	NM_001082485	77519	Mm.431849	NM_001082485	ENSMUSG00000060510	Zfp266	5330440G10Rik|5730601F06Rik|AW552317	zinc finger protein 266	protein-coding	5.69	1.27
	chr3-30527	chr3	126483200	126483700	+	5.69	500	Intergenic	Lx6|LINE|L1	-113501	NM_001293665	108058	Mm.255822	NM_023813	ENSMUSG00000053819	Camk2d	2810011D23Rik|8030469K03Rik|CaMK II|[d]-CaMKII	calcium/calmodulin-dependent protein kinase II, delta	protein-coding	5.69	1.09
	chr13-17500	chr13	6720315	6720815	+	5.69	500	Intergenic	Intergenic	-71794	NM_019703	56421	Mm.273874	NM_019703	ENSMUSG00000021196	Pfkp	1200015H23Rik|9330125N24Rik|ATP-PFK|PFK-C|PFK-P	phosphofructokinase, platelet	protein-coding	5.69	0.73
	chr15-41121	chr15	32556070	32556570	+	5.69	500	intron (NM_009154, intron 8 of 22)	intron (NM_009154, intron 8 of 22)	216832	NR_155440	105245909	Mm.229263	NR_155440	ENSMUSG00000115749	Gm41289	-	predicted gene, 41289	ncRNA	5.69	1.09
	chr1-40209	chr1	77027910	77028410	+	5.69	500	Intergenic	Intergenic	468608	NR_105770	102465180		NR_105770	ENSMUSG00000099141	Mir6352	Gm27481|mmu-mir-6352	microRNA 6352	ncRNA	5.69	1.27
	chr1-37092	chr1	5915899	5916399	+	5.69	500	3' UTR (NM_010342, exon 1 of 1)	3' UTR (NM_010342, exon 1 of 1)	1249	NM_010342	226304	Mm.291110	NM_010342	ENSMUSG00000033774	Npbwr1	Gpr7|Nbpwr1	neuropeptides B/W receptor 1	protein-coding	5.69	1.09
	chr17-32070	chr17	12476075	12476575	+	5.69	500	intron (NR_077216, intron 2 of 2)	intron (NR_077216, intron 2 of 2)	9481	NR_077216	77414	Mm.417145	NR_077216	ENSMUSG00000117314	C030013G03Rik	-	RIKEN cDNA C030013G03 gene	ncRNA	5.69	1.27
	chr5-33079	chr5	148633458	148633958	+	5.69	500	Intergenic	Intergenic	-80920	NM_011908	24109	Mm.21846	NM_011908	ENSMUSG00000001687	Ubl3	AW108023|HCG|MUB|mmMUB	ubiquitin-like 3	protein-coding	5.69	1.27
	chr1-35305	chr1	38768124	38768624	+	5.69	500	Intergenic	Intergenic	68313	NM_001029878	381338	Mm.487137	NM_028403	ENSMUSG00000048814	Lonrf2	2900060P06Rik|AI851349	LON peptidase N-terminal domain and ring finger 2	protein-coding	5.69	1.27
	chr12-20233	chr12	55940215	55940715	+	5.69	500	Intergenic	MLT1B|LTR|ERVL-MaLR	104099	NM_001037756	52592	Mm.24761	NM_027867	ENSMUSG00000012076	Brms1l	0710008O11Rik|AI159718|BRMS1|D12Ertd407e	breast cancer metastasis-suppressor 1-like	protein-coding	5.69	1.27
	chr17-31699	chr17	85401262	85401762	+	5.69	500	intron (NM_028576, intron 6 of 10)	intron (NM_028576, intron 6 of 10)	216884	NR_038086	100043902	Mm.150838	NR_015385	ENSMUSG00000093460	Six3os1	D17Mgi26|E130112H22Rik|Rncr1|Six3os	SIX homeobox 3, opposite strand 1	ncRNA	5.69	1.27
	chr7-26696	chr7	63797303	63797803	+	5.69	500	Intergenic	Intergenic	-119304	NM_001256311	381994	Mm.425466	NM_001256311	ENSMUSG00000095061	E030018B13Rik	Gm1697	RIKEN cDNA E030018B13 gene	protein-coding	5.69	1.09
	chr16-13928	chr16	20091184	20091684	+	5.69	500	Intergenic	Intergenic	-6120	NM_029436	75785	Mm.392450	NM_029436	ENSMUSG00000062901	Klhl24	1110046J11Rik|4930429H24Rik|6530402O20Rik|C85082	kelch-like 24	protein-coding	5.69	1.27
	chr5-30225	chr5	83439267	83439767	+	5.69	500	Intergenic	Intergenic	-84322	NM_153801	243078	Mm.126783	NM_153801	ENSMUSG00000049537	Tecrl	D330017N19Rik|Srd5a2l2	trans-2,3-enoyl-CoA reductase-like	protein-coding	5.69	1.09
	chr11-29858	chr11	71997806	71998306	+	5.69	500	Intergenic	L1M4a1|LINE|L1	39453	NM_053245	114230	Mm.95707	NM_053245	ENSMUSG00000040554	Aipl1	A930007I01Rik	aryl hydrocarbon receptor-interacting protein-like 1	protein-coding	5.69	1.27
	chr2-33842	chr2	72519181	72519681	+	5.69	500	Intergenic	Intergenic	43212	NM_025866	66953	Mm.270676	NM_025866	ENSMUSG00000055612	Cdca7	2310021G01Rik|AU044109|JPO1	cell division cycle associated 7	protein-coding	5.69	1.27
	chr2-37617	chr2	54487273	54487773	+	5.69	500	intron (NM_173030, intron 2 of 12)	C-rich|Low_complexity|Low_complexity	51136	NM_173030	271786	Mm.330227	NM_173030	ENSMUSG00000060988	Galnt13	A230002A12|A230020F20|BB182356	polypeptide N-acetylgalactosaminyltransferase 13	protein-coding	5.69	1.09
	chr19-14087	chr19	42479651	42480151	+	5.69	500	Intergenic	Intergenic	-38904	NM_177464	52013	Mm.254169	NM_177464	ENSMUSG00000025184	R3hcc1l	1700036B12Rik|AI450607|C10orf28|D19Ertd386e|GIDRP86|Gidrp88	R3H domain and coiled-coil containing 1 like	protein-coding	5.69	0.91
	chr6-30984	chr6	82756008	82756508	+	5.69	500	intron (NM_013820, intron 2 of 17)	intron (NM_013820, intron 2 of 17)	18196	NM_013820	15277	Mm.255848	NM_013820	ENSMUSG00000000628	Hk2	AI642394|HKII	hexokinase 2	protein-coding	5.69	1.09
	chr10-33070	chr10	102865420	102865920	+	5.69	500	Intergenic	MT2B2|LTR|ERVL	163107	NM_172553	216285	Mm.19287	NM_172553	ENSMUSG00000036602	Alx1	AI314867|C130005I02|Cart1	ALX homeobox 1	protein-coding	5.69	1.27
	chr12-18981	chr12	71685131	71685631	+	5.69	500	Intergenic	Intergenic	144774	NR_045941	73815	Mm.416916	NR_045941	ENSMUSG00000113630	4930404H11Rik	-	RIKEN cDNA 4930404H11 gene	ncRNA	5.69	1.09
	chr1-37245	chr1	26749404	26749904	+	5.69	500	Intergenic	Lx7|LINE|L1	-62194	NM_001033764	210940	Mm.297614	NM_001033764	ENSMUSG00000073722	4931408C20Rik	-	RIKEN cDNA 4931408C20 gene	protein-coding	5.69	1.27
	chr11-31071	chr11	59590063	59590563	+	5.69	500	promoter-TSS (NM_146429)	promoter-TSS (NM_146429)	-226	NM_146429	258421	Mm.377490	NM_146429	ENSMUSG00000048919	Olfr223	MOR256-30	olfactory receptor 223	protein-coding	5.69	0.91
	chr5-28037	chr5	33506427	33506927	+	5.69	500	Intergenic	Intergenic	-72587	NM_011320	672284		NM_011320	ENSMUSG00000029112	Nkx1-1	Nkx-1.1|Sax2	NK1 homeobox 1	protein-coding	5.69	1.27
	chr15-42597	chr15	66038197	66038697	+	5.69	500	intron (NM_152923, intron 1 of 14)	intron (NM_152923, intron 1 of 14)	-61643	NM_001145096	654498	Mm.364550	NM_001145096	ENSMUSG00000072511	Hhla1	F930104E18Rik	HERV-H LTR-associating 1	protein-coding	5.69	1.09
	chr14-12842	chr14	94238529	94239029	+	5.69	500	Intergenic	Intergenic	-348100	NM_001346722	211712	Mm.37126	NM_001081377	ENSMUSG00000055421	Pcdh9	-	protocadherin 9	protein-coding	5.69	1.27
	chr8-16376	chr8	85459005	85459505	+	5.69	500	Intergenic	Intergenic	-26414	NM_025722	66714	Mm.272748	NM_025722	ENSMUSG00000036934	4921524J17Rik	-	RIKEN cDNA 4921524J17 gene	protein-coding	5.69	1.27
	chr3-33255	chr3	153282129	153282629	+	5.69	500	intron (NM_011372, intron 3 of 4)	intron (NM_011372, intron 3 of 4)	16270	NR_126464	75489	Mm.443252	NR_126464	ENSMUSG00000105023	1700012D16Rik	-	RIKEN cDNA 1700012D16 gene	ncRNA	5.69	1.27
	chr5-28118	chr5	42120196	42120696	+	5.69	500	intron (NR_131130, intron 1 of 2)	intron (NR_131130, intron 1 of 2)	52486	NR_131130	433882	Mm.319353	NR_131130	ENSMUSG00000067285	Gm16223	EG433882	predicted gene 16223	ncRNA	5.69	1.09
	chr4-42923	chr4	119355300	119355800	+	5.5	500	intron (NM_028506, intron 3 of 10)	RLTR48A|LTR|ERV1	4344	NM_001270446	73332	Mm.425204	NM_028506	ENSMUSG00000028637	Ccdc30	1700001O02Rik|1700041C02Rik|1700111D19Rik|4930445I03Rik	coiled-coil domain containing 30	protein-coding	5.5	0.91
	chr1-40161	chr1	73525641	73526141	+	5.5	500	Intergenic	Intergenic	-118322	NR_003202	723792	Mm.385493	NR_003202		Pinc	-	pregnancy induced noncoding RNA	ncRNA	5.5	1.09
	chr7-30463	chr7	118284063	118284563	+	5.5	500	Intergenic	Intergenic	40406	NR_027879	67745	Mm.483404	NM_183267	ENSMUSG00000055159	4930583K01Rik	-	RIKEN cDNA 4930583K01 gene	ncRNA	5.5	0.55
	chr12-17433	chr12	33145770	33146270	+	5.5	500	intron (NR_015602, intron 1 of 5)	intron (NR_015602, intron 1 of 5)	1566	NR_015602	320046	Mm.208337	NR_015602	ENSMUSG00000052125	F730043M19Rik	-	RIKEN cDNA F730043M19 gene	ncRNA	5.5	0.73
	chr3-33860	chr3	41406759	41407259	+	5.5	500	Intergenic	RMER1B|Other|Other	86190	NR_040385	78706	Mm.366094	NR_040385	ENSMUSG00000097639	Platr4	C430002E04Rik	pluripotency associated transcript 4	ncRNA	5.5	1.27
	chr5-31618	chr5	43936464	43936964	+	5.5	500	Intergenic	Intergenic	45085	NM_001271616	14181	Mm.46053	NM_008009	ENSMUSG00000048373	Fgfbp1	FGF-BP|FGF-BP1|FGFBP-1	fibroblast growth factor binding protein 1	protein-coding	5.5	1.27
	chr6-33860	chr6	116918548	116919048	+	5.5	500	Intergenic	Intergenic	-202040	NM_178768	319776	Mm.133120	NM_178768	ENSMUSG00000048108	Tmem72	C230095G01Rik	transmembrane protein 72	protein-coding	5.5	0.91
	chr19-14486	chr19	18219154	18219654	+	5.5	500	Intergenic	Tigger13a|DNA|TcMar-Tigger	-381772	NM_001190483	18552	Mm.3401	NM_001163144	ENSMUSG00000024713	Pcsk5	PC5|PC6|SPC6|b2b1549Clo|b2b585Clo	proprotein convertase subtilisin/kexin type 5	protein-coding	5.5	0.91
	chr11-31879	chr11	110945984	110946484	+	5.5	500	Intergenic	Intergenic	-21799	NM_001252207	16517	Mm.30176	NM_010604	ENSMUSG00000051497	Kcnj16	6430410F18Rik|AI132396|Kir5.1	potassium inwardly-rectifying channel, subfamily J, member 16	protein-coding	5.5	0.73
	chr13-20614	chr13	91359868	91360368	+	5.5	500	Intergenic	Intergenic	27967	NR_045161	320297	Mm.375866	NR_045161	ENSMUSG00000097182	A830009L08Rik	-	RIKEN cDNA A830009L08 gene	ncRNA	5.5	1.27
	chr3-34532	chr3	88011552	88012052	+	5.5	500	Intergenic	B1_Mur2|SINE|Alu	-11446	NM_007529	12032	Mm.4598	NM_007529	ENSMUSG00000004892	Bcan	Cspg7	brevican	protein-coding	5.5	0.91
	chr16-14507	chr16	95519608	95520108	+	5.5	500	intron (NM_001302179, intron 2 of 9)	intron (NM_001302179, intron 2 of 9)	10507	NM_001302183	13876	Mm.164531	NM_133659	ENSMUSG00000040732	Erg	D030036I24Rik	ETS transcription factor	protein-coding	5.5	1.27
	chr8-15306	chr8	27243873	27244373	+	5.5	500	Intergenic	Intergenic	-14535	NM_013462	11556	Mm.278475	NM_013462	ENSMUSG00000031489	Adrb3	Adrb-3|beta 3-AR	adrenergic receptor, beta 3	protein-coding	5.5	1.09
	chr13-16496	chr13	6258589	6259089	+	5.5	500	Intergenic	Intergenic	-289318	NM_001360106	69617	Mm.41933	NM_145131	ENSMUSG00000021193	Pitrm1	2310012C15Rik|AA410010|MP-1|MP1|Ntup1|PreP|mKIAA1104	pitrilysin metallepetidase 1	protein-coding	5.5	1.27
	chr8-16181	chr8	53359142	53359642	+	5.5	500	Intergenic	Intergenic	-152310	NM_001005847	11593	Mm.334535	NM_001005847	ENSMUSG00000031521	Aga	AW060726	aspartylglucosaminidase	protein-coding	5.5	1.09
	chr3-32916	chr3	139958985	139959485	+	5.5	500	Intergenic	Intergenic	-69014	NR_105798	102465198		NR_105798	ENSMUSG00000099169	Mir7j	Gm27716|Mirlet7j|mmu-let-7j	microRNA 7j	ncRNA	5.5	1.27
	chr8-16381	chr8	86163248	86163748	+	5.5	500	Intergenic	Intergenic	322510	NM_199446	102093	Mm.237296	NM_199446	ENSMUSG00000036879	Phkb	AI463271	phosphorylase kinase beta	protein-coding	5.5	1.27
	chr1-40040	chr1	65066995	65067495	+	5.5	500	Intergenic	L1_Mus3|LINE|L1	-3805	NM_007776	12967	Mm.425031	NM_007776	ENSMUSG00000067299	Crygd	Aey4|Cryg-1|DGcry-1|Lop12	crystallin, gamma D	protein-coding	5.5	1.27
	chr6-28509	chr6	37814241	37814741	+	5.5	500	Intergenic	(TTTC)n|Simple_repeat|Simple_repeat	-56320	NM_145076	21848	Mm.41063	NM_145076	ENSMUSG00000029833	Trim24	A130082H20Rik|AI447469|D430004I05Rik|TIF1|TIF1-alpha|TIF1alpha|Tif1a	tripartite motif-containing 24	protein-coding	5.5	1.27
	chr15-44351	chr15	20256601	20257101	+	5.5	500	Intergenic	Intergenic	409899	NM_022816	64833	Mm.352763	NM_022816	ENSMUSG00000047565	Acot10	Acate3|MT-ACT48|p48	acyl-CoA thioesterase 10	protein-coding	5.5	0.91
	chr1-43124	chr1	83309569	83310069	+	5.5	500	intron (NM_172430, intron 3 of 10)	intron (NM_172430, intron 3 of 10)	98381	NM_172430	77629	Mm.154303	NM_172430	ENSMUSG00000026163	Sphkap	4930544G21Rik|A930009L15Rik|AI852220|SKIP|mKIAA1678	SPHK1 interactor, AKAP domain containing	protein-coding	5.5	1.27
	chr6-29926	chr6	8729537	8730037	+	5.5	500	intron (NM_001252266, intron 5 of 11)	intron (NM_001252266, intron 5 of 11)	28671	NM_001252266	15893	Mm.275683	NM_010492	ENSMUSG00000062995	Ica1	69kDa|ICA69	islet cell autoantigen 1	protein-coding	5.5	0.91
	chr19-14962	chr19	52611551	52612051	+	5.5	500	Intergenic	L1_Mus4|LINE|L1	-311380	NR_030678	100043450	Mm.145594	NR_030678	ENSMUSG00000117896	AA387883	-	expressed sequence AA387883	ncRNA	5.5	1.27
	chr15-46993	chr15	87478256	87478756	+	5.5	500	Intergenic	ORR1G|LTR|ERVL-MaLR	-65793	NM_001252310	106014	Mm.244319	NM_134096	ENSMUSG00000054863	Tafa5	Fam19a5|Tafa-5|Tara-5	TAFA chemokine like family member 5	protein-coding	5.5	1.27
	chr5-30188	chr5	75961712	75962212	+	5.5	500	intron (NM_010612, intron 10 of 29)	intron (NM_010612, intron 10 of 29)	16493	NM_010612	16542	Mm.285	NM_010612	ENSMUSG00000062960	Kdr	6130401C07|Flk-1|Flk1|Krd-1|Ly73|VEGFR-2|VEGFR2|orv|sVEGFR-2	kinase insert domain protein receptor	protein-coding	5.5	1.27
	chr11-36907	chr11	96481429	96481929	+	5.5	500	intron (NM_001033186, intron 1 of 12)	(GA)n|Simple_repeat|Simple_repeat	17088	NM_001033186	78473	Mm.395840	NM_001033186	ENSMUSG00000057058	Skap1	1700091G21Rik|Scap1|Skap-55	src family associated phosphoprotein 1	protein-coding	5.5	1.09
	chr4-39332	chr4	106781060	106781560	+	5.5	500	intron (NM_001347159, intron 1 of 15)	intron (NM_001347159, intron 1 of 15)	18521	NM_025590	329910	Mm.222956	NM_025590	ENSMUSG00000034853	Acot11	1110020M10Rik|2010309H15Rik|AW060409|BFIT|BFIT1|Thea|Them1|mKIAA0707	acyl-CoA thioesterase 11	protein-coding	5.5	1.09
	chr14-15852	chr14	41033612	41034112	+	5.5	500	Intergenic	Intergenic	-20029	NM_001316737	70564	Mm.27227	NM_027464	ENSMUSG00000021792	Prxl2a	5730469M10Rik|AU040822|Adrx|Fam213a|Pamm	peroxiredoxin like 2A	protein-coding	5.5	1.27
	chr7-29094	chr7	4730448	4730948	+	5.5	500	Intergenic	RSINE1|SINE|B4	-5447	NM_177887	330460	Mm.361851	NM_177887	ENSMUSG00000046456	Tmem150b	A630041N19|Tmem224	transmembrane protein 150B	protein-coding	5.5	0.73
	chr17-33667	chr17	67783834	67784334	+	5.5	500	intron (NM_008480, intron 34 of 62)	intron (NM_008480, intron 34 of 62)	86819	NM_008480	16772	Mm.303386	NM_008480	ENSMUSG00000032796	Lama1	AA408497|Lama	laminin, alpha 1	protein-coding	5.5	1.27
	chr11-30112	chr11	87966913	87967413	+	5.5	500	Intergenic	B4|SINE|B4	19422	NM_001168472	68097	Mm.246436	NM_026556	ENSMUSG00000020483	Dynll2	1700064A15Rik|6720463E02Rik|C87222|DLC8|DLC8b|Dlc2	dynein light chain LC8-type 2	protein-coding	5.5	1.27
	chr1-39490	chr1	14667678	14668178	+	5.5	500	Intergenic	Intergenic	88038	NM_001360810	17681	Mm.5820	NM_010827	ENSMUSG00000025930	Msc	MyoR|bHLHa22	musculin	protein-coding	5.5	1.27
	chr13-23490	chr13	69436265	69436765	+	5.5	500	Intergenic	MLT1J|LTR|ERVL-MaLR	97349	NM_198600	210106	Mm.315959	NM_198600	ENSMUSG00000034575	Tent4a	LAK-1|POLK|Papd7|Pols|TRF4|TRF4-1	terminal nucleotidyltransferase 4A	protein-coding	5.5	0.91
	chr3-36091	chr3	20925661	20926161	+	5.5	500	Intergenic	Intergenic	-558734	NM_175086	11608	Mm.134863	NM_175086	ENSMUSG00000054988	Agtr1b	AT1B|AT2R1B|Agtr-1b|Angtr-1b	angiotensin II receptor, type 1b	protein-coding	5.5	1.27
	chr6-33255	chr6	65563181	65563681	+	5.5	500	Intergenic	Intergenic	-26967	NM_001001495	414084	Mm.117558	NM_001001495	ENSMUSG00000044162	Tnip3	9030611K07Rik|ABIN-3|LIND	TNFAIP3 interacting protein 3	protein-coding	5.5	1.27
	chr8-15708	chr8	104962009	104962509	+	5.5	500	intron (NM_197999, intron 1 of 11)	intron (NM_197999, intron 1 of 11)	541	NM_197999	72361	Mm.26580	NM_197999	ENSMUSG00000031877	Ces2g	2210023G05Rik|Ces2l	carboxylesterase 2G	protein-coding	5.5	1.27
	chr2-42286	chr2	42133807	42134307	+	5.5	500	intron (NM_053011, intron 2 of 90)	intron (NM_053011, intron 2 of 90)	313511	NR_105754	102465171		NR_105754	ENSMUSG00000098660	Mir6336	Gm27584|mmu-mir-6336	microRNA 6336	ncRNA	5.5	1.09
	chr6-30917	chr6	71338839	71339339	+	5.5	500	Intergenic	Intergenic	16301	NM_009858	12526	Mm.333148	NM_009858	ENSMUSG00000053044	Cd8b1	Cd8b|Ly-3|Ly-C|Lyt-3	CD8 antigen, beta chain 1	protein-coding	5.5	1.09
	chr19-14789	chr19	34726323	34726823	+	5.5	500	intron (NM_172838, intron 1 of 6)	L1MB3|LINE|L1	20755	NM_172838	240638	Mm.74636	NM_172838	ENSMUSG00000009378	Slc16a12	3230401A21|AW210596|MCT 12	solute carrier family 16 (monocarboxylic acid transporters), member 12	protein-coding	5.5	1.09
	chr18-10466	chr18	44660718	44661218	+	5.5	500	promoter-TSS (NR_026853)	promoter-TSS (NR_026853)	-697	NR_026853	626275	Mm.427116	NR_026853	ENSMUSG00000097610	A930012L18Rik	-	RIKEN cDNA A930012L18 gene	ncRNA	5.5	1.09
	chr9-19121	chr9	57184983	57185483	+	5.5	500	intron (NR_033784, intron 5 of 5)	intron (NR_033784, intron 5 of 5)	9958	NR_033784	67319	Mm.234187	NR_033784	ENSMUSG00000100282	1700041C23Rik	-	RIKEN cDNA 1700041C23 gene	ncRNA	5.5	1.27
	chr19-15330	chr19	16805052	16805552	+	5.5	500	Intergenic	CT-rich|Low_complexity|Low_complexity	-24369	NM_173028	271564	Mm.211963	NM_173028	ENSMUSG00000046230	Vps13a	4930425F11|4930516E05Rik|4930543C13Rik|9930023P20|Chac|Chorein|D330038K10Rik|mKIAA0986	vacuolar protein sorting 13A	protein-coding	5.5	1.27
	chr15-44833	chr15	37845403	37845903	+	5.5	500	Intergenic	ERVB5_1-I_MM-int|LTR|ERVK	-53225	NM_001359841	52589	Mm.283370	NM_134094	ENSMUSG00000051359	Ncald	AI848120|D030020D09Rik|D15Ertd412e	neurocalcin delta	protein-coding	5.5	1.27
	chr12-15600	chr12	51251448	51251948	+	5.5	500	Intergenic	Intergenic	-96532	NM_001167963	217558	Mm.253264	NM_001015099	ENSMUSG00000035293	G2e3	6030408C04Rik|9030416F18|AW046379|D930034K21Rik|mKIAA1333	G2/M-phase specific E3 ubiquitin ligase	protein-coding	5.5	1.27
	chr17-36679	chr17	73786994	73787494	+	5.5	500	Intergenic	GA-rich|Low_complexity|Low_complexity	-17597	NM_020578	57440	Mm.18526	NM_020578	ENSMUSG00000024065	Ehd3	Ehd2	EH-domain containing 3	protein-coding	5.5	1.27
	chr7-28168	chr7	65533018	65533518	+	5.5	500	Intergenic	ERVL-B4-int|LTR|ERVL	-48763	NR_131060	407810	Mm.249337	NR_131060	ENSMUSG00000086662	BC046251	-	cDNA sequence BC046251	ncRNA	5.5	1.27
	chrX-6698	chrX	162846832	162847332	+	5.5	500	intron (NR_038088, intron 3 of 5)	RLTR26B_MM|LTR|ERVK	-17628	NM_001290777	353170	Mm.270186	NM_178935	ENSMUSG00000038344	Txlng	4932441K18Rik|Fiat|Lrp	taxilin gamma	protein-coding	5.5	1.27
	chr15-50664	chr15	65643302	65643802	+	5.32	500	Intergenic	Intergenic	-143468	NM_133766	76740	Mm.260647	NM_133766	ENSMUSG00000015002	Efr3a	A130089M23Rik|BB071175|C76891|C920006C10Rik|D030063F01Rik|mKIAA0143	EFR3 homolog A	protein-coding	5.32	1.27
	chr4-43541	chr4	12348846	12349346	+	5.32	500	Intergenic	ORR1D2|LTR|ERVL-MaLR	-177081	NM_026558	68099	Mm.25340	NM_026558	ENSMUSG00000028218	Fam92a	6720467C03Rik|Fam92a1	family with sequence similarity 92, member A	protein-coding	5.32	1.27
	chr13-22388	chr13	114742691	114743191	+	5.32	500	Intergenic	Intergenic	-75296	NM_013826	17434	Mm.19027	NM_013826	ENSMUSG00000015536	Mocs2	AI415403	molybdenum cofactor synthesis 2	protein-coding	5.32	1.27
	chr3-40125	chr3	69240718	69241218	+	5.32	500	Intergenic	Intergenic	18549	NM_027843	71619	Mm.98122	NM_027843	ENSMUSG00000098207	Arl14	9130014L17Rik|Arf7	ADP-ribosylation factor-like 14	protein-coding	5.32	1.27
	chr4-34641	chr4	13423477	13423977	+	5.32	500	Intergenic	Intergenic	-319575	NM_001111026	12395	Mm.4909	NM_009822	ENSMUSG00000006586	Runx1t1	Cbfa2t1h|ETO|MTG8	RUNX1 translocation partner 1	protein-coding	5.32	1.27
	chr17-32413	chr17	23525586	23526086	+	5.32	500	Intergenic	ETnERV-int|LTR|ERVK	-24963	NR_126485	320020	Mm.445111	NR_126484	ENSMUSG00000117322	6330415G19Rik	-	RIKEN cDNA 6330415G19 gene	ncRNA	5.32	1.27
	chr1-47295	chr1	154928412	154928912	+	5.32	500	Intergenic	B4|SINE|B4	154602	NR_151545	671336	Mm.393476	NR_151545	ENSMUSG00000096950	Gm9530	-	predicted gene 9530	ncRNA	5.32	1.09
	chr1-47303	chr1	155297900	155298400	+	5.32	500	intron (NM_011273, intron 11 of 14)	intron (NM_011273, intron 11 of 14)	-53618	NM_001370865	207792	Mm.29270	NM_001370865	ENSMUSG00000033722	BC034090	6820428L09|mKIAA1614	cDNA sequence BC034090	protein-coding	5.32	1.27
	chr15-43725	chr15	102919483	102919983	+	5.32	500	Intergenic	Intergenic	-1398	NM_010464	15422	Mm.207062	NM_010464	ENSMUSG00000001655	Hoxc13	-	homeobox C13	protein-coding	5.32	1.27
	chr6-32291	chr6	14149153	14149653	+	5.32	500	Intergenic	B4|SINE|B4	277834	NR_045995	76311	Mm.367129	NR_045995	ENSMUSG00000097616	1110019D14Rik	-	RIKEN cDNA 1110019D14 gene	ncRNA	5.32	1.27
	chr3-39204	chr3	26018138	26018638	+	5.32	500	intron (NM_138666, intron 3 of 7)	intron (NM_138666, intron 3 of 7)	135598	NM_001357097	192167	Mm.316080	NM_138666	ENSMUSG00000063887	Nlgn1	6330415N05Rik|BB179718|NL1|Nlg1|mKIAA1070	neuroligin 1	protein-coding	5.32	1.09
	chr10-37911	chr10	66415483	66415983	+	5.32	500	Intergenic	L1_Mus3|LINE|L1	270437	NR_131070	77198	Mm.107617	NR_131070	ENSMUSG00000112210	4930407I19Rik	-	RIKEN cDNA 4930407I19 gene	ncRNA	5.32	1.27
	chr6-37303	chr6	147695010	147695510	+	5.32	500	intron (NR_033636, intron 2 of 3)	intron (NR_033636, intron 2 of 3)	5019	NR_033636	100039727	Mm.396220	NR_033636	ENSMUSG00000085077	1700049E15Rik	Gm15761	RIKEN cDNA 1700049E15 gene	ncRNA	5.32	1.27
	chr18-11095	chr18	47997827	47998327	+	5.32	500	intron (NR_045404, intron 2 of 3)	intron (NR_045404, intron 2 of 3)	-47258	NM_001025388	433182	Mm.70666	NM_001025388	ENSMUSG00000059040	Eno1b	EG433182|Eno-1|Eno1|Gm5506|NNE	enolase 1B, retrotransposed	protein-coding	5.32	1.27
	chr19-17291	chr19	17514539	17515039	+	5.32	500	intron (NM_001190483, intron 22 of 37)	intron (NM_001190483, intron 22 of 37)	120746	NM_019437	54391	Mm.7013	NM_019437	ENSMUSG00000024712	Rfk	0610038L10Rik|AF031381|KOI-4	riboflavin kinase	protein-coding	5.32	1.27
	chr9-18774	chr9	23907143	23907643	+	5.32	500	Intergenic	Intergenic	-190625	NM_175678	319239	Mm.130824	NM_175678	ENSMUSG00000043659	Npsr1	9330128H10Rik|GPRA|Gpr154|MVTR|PGR14|VRR1	neuropeptide S receptor 1	protein-coding	5.32	1.09
	chr2-48380	chr2	36370233	36370733	+	5.32	500	Intergenic	L1_Mus3|LINE|L1	-6295	NM_146947	258949		NM_146947	ENSMUSG00000068950	Olfr338	MOR136-5	olfactory receptor 338	protein-coding	5.32	1.27
	chr11-32729	chr11	70448063	70448563	+	5.32	500	Intergenic	PB1|SINE|Alu	-3605	NM_025397	66172	Mm.46424	NM_025397	ENSMUSG00000018923	Med11	1110030J09Rik|AI465144|AW545069	mediator complex subunit 11	protein-coding	5.32	1.27
	chr10-29165	chr10	10677192	10677692	+	5.32	500	Intergenic	Intergenic	71497	NR_033630	382450	Mm.422788	NR_033630	ENSMUSG00000098065	Gm5177	EG382450	glyceraldehyde-3-phosphate dehydrogenase pseudogene	pseudo	5.32	0.91
	chr10-39500	chr10	129850963	129851463	+	5.32	500	Intergenic	L1_Mus2|LINE|L1	-5307	NM_207147	258252	Mm.377395	NM_207147	ENSMUSG00000052818	Olfr813	MOR108-3	olfactory receptor 813	protein-coding	5.32	0.91
	chr15-48509	chr15	26658313	26658813	+	5.32	500	intron (NM_176959, intron 2 of 3)	intron (NM_176959, intron 2 of 3)	237001	NM_176959	448987	Mm.253378	NM_176959	ENSMUSG00000043556	Fbxl7	AL023057|D230018M15Rik|FBL7|Fbl6	F-box and leucine-rich repeat protein 7	protein-coding	5.32	1.09
	chr6-33893	chr6	119561470	119561970	+	5.32	500	Intergenic	L1MB3|LINE|L1	-17373	NM_009525	22419	Mm.321818	NM_009525	ENSMUSG00000030170	Wnt5b	AW545702|Wnt-5b	wingless-type MMTV integration site family, member 5B	protein-coding	5.32	1.09
	chr16-15480	chr16	5616751	5617251	+	5.32	500	Intergenic	Intergenic	-267792	NM_001359730	268859	Mm.370334	NM_021477	ENSMUSG00000008658	Rbfox1	A2bp|A2bp1|Hrnbp1|fox-1	RNA binding protein, fox-1 homolog (C. elegans) 1	protein-coding	5.32	1.27
	chr19-19805	chr19	11293445	11293945	+	5.32	500	intron (NR_045317, intron 2 of 2)	ERVB4_1B-I_MM-int|LTR|ERVK	-9882	NM_183190	269063	Mm.268940	NM_183190	ENSMUSG00000054523	Ms4a5	-	membrane-spanning 4-domains, subfamily A, member 5	protein-coding	5.32	1.27
	chr17-33822	chr17	72350921	72351421	+	5.32	500	intron (NM_007439, intron 3 of 28)	intron (NM_007439, intron 3 of 28)	253136	NM_007439	11682	Mm.311854	NM_007439	ENSMUSG00000055471	Alk	CD246|Tcrz	anaplastic lymphoma kinase	protein-coding	5.32	0.91
	chr13-21081	chr13	10411981	10412481	+	5.32	500	Intergenic	MTE2a|LTR|ERVL-MaLR	-51428	NM_033269	12671	Mm.342315	NM_033269	ENSMUSG00000046159	Chrm3	Chrm-3|M3|M3R	cholinergic receptor, muscarinic 3, cardiac	protein-coding	5.32	1.27
	chr15-51399	chr15	87523367	87523867	+	5.32	500	Intergenic	Intergenic	-20682	NM_001252310	106014	Mm.244319	NM_134096	ENSMUSG00000054863	Tafa5	Fam19a5|Tafa-5|Tara-5	TAFA chemokine like family member 5	protein-coding	5.32	1.09
	chr10-34356	chr10	31172289	31172789	+	5.32	500	Intergenic	Intergenic	-140866	NM_027168	69692	Mm.245537	NM_027168	ENSMUSG00000000295	Hddc2	2310057G13Rik	HD domain containing 2	protein-coding	5.32	1.09
	chr12-19539	chr12	117911302	117911802	+	5.32	500	intron (NM_010060, intron 73 of 81)	intron (NM_010060, intron 73 of 81)	67691	NM_146040	217946	Mm.281149	NM_146040	ENSMUSG00000021175	Cdca7l	BC006933|JPO2	cell division cycle associated 7 like	protein-coding	5.32	1.09
	chr6-35703	chr6	45395228	45395728	+	5.32	500	intron (NM_001004357, intron 1 of 23)	L1M4a2|LINE|L1	335417	NM_001004357	66797	Mm.440084	NM_025771	ENSMUSG00000039419	Cntnap2	5430425M22Rik|Caspr2|mKIAA0868	contactin associated protein-like 2	protein-coding	5.32	0.36
	chr13-16745	chr13	31374108	31374608	+	5.32	500	Intergenic	Intergenic	-133272	NR_045957	73924	Mm.417825	NR_045957	ENSMUSG00000087460	4930401O12Rik	-	RIKEN cDNA 4930401O12 gene	ncRNA	5.32	1.27
	chr10-32645	chr10	85420803	85421303	+	5.32	500	intron (NM_028709, intron 1 of 16)	intron (NM_028709, intron 1 of 16)	34239	NM_028709	74007	Mm.36544	NM_028709	ENSMUSG00000020042	Btbd11	6330404E16Rik	BTB (POZ) domain containing 11	protein-coding	5.32	1.27
	chr2-42033	chr2	23069963	23070463	+	5.32	500	intron (NM_001355642, intron 2 of 11)	intron (NM_001355642, intron 2 of 11)	1141	NM_001102437	74159	Mm.181973	NM_028793	ENSMUSG00000026781	Acbd5	1300014E15Rik	acyl-Coenzyme A binding domain containing 5	protein-coding	5.32	0.73
	chr8-16838	chr8	23376156	23376656	+	5.32	500	Intergenic	Intergenic	-35096	NM_013834	20377	Mm.281691	NM_013834	ENSMUSG00000031548	Sfrp1	2210415K03Rik|AW011917|AW107218|AW742929|sFRP-1	secreted frizzled-related protein 1	protein-coding	5.32	1.27
	chr10-37542	chr10	40129138	40129638	+	5.32	500	intron (NM_001114332, intron 1 of 5)	intron (NM_001114332, intron 1 of 5)	12866	NM_001114332	72472	Mm.186778	NM_028247	ENSMUSG00000019838	Slc16a10	2610103N14Rik|9830169E08|Mct10|PRO0813|TAT1	solute carrier family 16 (monocarboxylic acid transporters), member 10	protein-coding	5.32	1.27
	chr10-38952	chr10	105697358	105697858	+	5.32	500	Intergenic	MTB|LTR|ERVL-MaLR	123057	NR_038032	327812	Mm.191660	NR_038032	ENSMUSG00000085282	Gm15663	9330159K06	predicted gene 15663	ncRNA	5.32	1.09
	chr15-55927	chr15	73079586	73080086	+	5.32	500	Intergenic	Intergenic	-10576	NM_053068	93696	Mm.23095	NM_053068	ENSMUSG00000068391	Chrac1	2410152E03Rik|2810406L04Rik|YCL1	chromatin accessibility complex 1	protein-coding	5.32	1.27
	chr5-33178	chr5	3674504	3675004	+	5.32	500	intron (NM_029154, intron 9 of 10)	intron (NM_029154, intron 9 of 10)	17750	NM_029154	75010	Mm.85064	NM_029141	ENSMUSG00000014529	Tmbim7	4930403J02Rik|4930500J03Rik|4930511M11Rik|Lfg5|Lgf5|Tmbim1b	transmembrane BAX inhibitor motif containing 7	protein-coding	5.32	0.91
	chr7-30496	chr7	122274713	122275213	+	5.32	500	Intergenic	Lx9|LINE|L1	-14162	NM_008855	18751	Mm.207496	NM_008855	ENSMUSG00000052889	Prkcb	PKC-B|PKC-Beta|Pkcb|Prkcb1|Prkcb2	protein kinase C, beta	protein-coding	5.32	1.27
	chr3-39894	chr3	60021476	60021976	+	5.32	500	intron (NM_001128091, intron 4 of 4)	intron (NM_001128091, intron 4 of 4)	-10062	NM_023383	67758	Mm.24547	NM_023383	ENSMUSG00000027761	Aadac	5033417E09Rik|AI265437|Aada	arylacetamide deacetylase	protein-coding	5.32	1.27
	chr4-42038	chr4	91552620	91553120	+	5.32	500	Intergenic	Intergenic	-152886	NM_207685	15569	Mm.318042	NM_010486	ENSMUSG00000008489	Elavl2	Hub|mel-N1	ELAV like RNA binding protein 1	protein-coding	5.32	1.27
	chr11-33073	chr11	90976513	90977013	+	5.32	500	Intergenic	Intergenic	172072	NR_045956	73922	Mm.233289	NR_045956	ENSMUSG00000085940	4930405D11Rik	-	RIKEN cDNA 4930405D11 gene	ncRNA	5.32	1.09
	chr6-33347	chr6	73323542	73324042	+	5.32	500	Intergenic	Intergenic	75287	NM_019879	56451	Mm.29845	NM_019879	ENSMUSG00000052738	Suclg1	1500000I01Rik|Sucla1	succinate-CoA ligase, GDP-forming, alpha subunit	protein-coding	5.32	1.27
	chr4-43676	chr4	40032448	40032948	+	5.32	500	Intergenic	Intergenic	-110567	NM_007386	11428	Mm.331547	NM_007386	ENSMUSG00000028405	Aco1	Aco-1|Irebp|Irp1	aconitase 1	protein-coding	5.32	1.27
	chr6-34133	chr6	135706793	135707293	+	5.32	500	Intergenic	ORR1C2|LTR|ERVL-MaLR	48130	NR_126088	75024	Mm.399147	NR_126088	ENSMUSG00000107396	4930425L21Rik	4930473P14Rik	RIKEN cDNA 4930425L21 gene	ncRNA	5.32	1.09
	chr10-34125	chr10	21695764	21696264	+	5.32	500	Intergenic	(GGGAA)n|Simple_repeat|Simple_repeat	5169	NR_045843	432436	Mm.244553	NM_001004162	ENSMUSG00000056716	Gm5420	EG432436	predicted gene 5420	ncRNA	5.32	1.09
	chr2-44832	chr2	21492941	21493441	+	5.32	500	intron (NM_001004761, intron 2 of 10)	L1Md_T|LINE|L1	125624	NM_001004761	241263	Mm.166647	NM_175706	ENSMUSG00000045967	Gpr158	5330427M13Rik|mKIAA1136	G protein-coupled receptor 158	protein-coding	5.32	1.27
	chr11-34600	chr11	83082732	83083232	+	5.32	500	Intergenic	SRV_MM-int|LTR|ERVK	17870	NM_011408	20556	Mm.278689	NM_011408	ENSMUSG00000072620	Slfn2	Shlf2	schlafen 2	protein-coding	5.32	0.91
	chr15-42089	chr15	56611150	56611650	+	5.32	500	Intergenic	Lx|LINE|L1	-78544	NR_002874	594843	Mm.484850	NR_002874	ENSMUSG00000086541	Has2os	EG594843|Has2as|Hasnt	hyaluronan synthase 2, opposite strand	ncRNA	5.32	1.27
	chr19-15694	chr19	36042278	36042778	+	5.32	500	intron (NM_001360300, intron 1 of 3)	intron (NM_001360300, intron 1 of 3)	14832	NM_001347442	15566	Mm.254266	NM_008315	ENSMUSG00000024798	Htr7	5-HT-X|5-HT7	5-hydroxytryptamine (serotonin) receptor 7	protein-coding	5.32	1.09
	chr8-17778	chr8	29153610	29154110	+	5.32	500	intron (NM_153135, intron 1 of 17)	intron (NM_153135, intron 1 of 17)	65776	NM_001347501	210801	Mm.248433	NM_153135	ENSMUSG00000063626	Unc5d	D930029E11Rik|Unc5h4|mKIAA1777	unc-5 netrin receptor D	protein-coding	5.32	0.73
	chr2-42110	chr2	28455155	28455655	+	5.32	500	3' UTR (NM_001368159, exon 4 of 4)	3' UTR (NM_001368159, exon 4 of 4)	8335	NM_001368159	241289	Mm.330095	NM_001005420	ENSMUSG00000035829	Ppp1r26	Gm347|Kiaa0649|mKIAA0649	protein phosphatase 1, regulatory subunit 26	protein-coding	5.32	1.27
	chr8-17295	chr8	92814297	92814797	+	5.32	500	Intergenic	Intergenic	-12750	NM_008610	17390	Mm.29564	NM_008610	ENSMUSG00000031740	Mmp2	Clg4a|GelA|MMP-2	matrix metallopeptidase 2	protein-coding	5.32	1.09
	chr6-37073	chr6	139982574	139983074	+	5.32	500	Intergenic	RMER15|LTR|ERVL	58593	NM_054066	114875	Mm.50808	NM_054066	ENSMUSG00000030230	Plcz1	1700041H07Rik|PLCzeta	phospholipase C, zeta 1	protein-coding	5.32	0.91
	chr19-15377	chr19	20134909	20135409	+	5.32	500	Intergenic	Intergenic	255512	NM_010730	16952	Mm.248360	NM_010730	ENSMUSG00000024659	Anxa1	Anx-1|Anx-A1|C430014K04Rik|Lpc-1|Lpc1	annexin A1	protein-coding	5.32	1.27
	chr1-42297	chr1	41099390	41099890	+	5.32	500	Intergenic	B1_Mus1|SINE|Alu	81612	NR_040475	74897	Mm.243822	NR_040475	ENSMUSG00000104072	4930448I06Rik	-	RIKEN cDNA 4930448I06 gene	ncRNA	5.32	0.91
	chr16-16951	chr16	27701569	27702069	+	5.32	500	Intergenic	Intergenic	-148111	NR_033475	100038623	Mm.387135	NR_033475	ENSMUSG00000116654	Gm10823	-	predicted gene 10823	ncRNA	5.32	1.27
	chrX-7011	chrX	157267394	157267894	+	5.32	500	intron (NM_011077, intron 13 of 21)	B3|SINE|B2	147642	NM_011077	18675	Mm.2529	NM_011077	ENSMUSG00000057457	Phex	Gy|HPDR|HPDR1|Hyp|PEX	phosphate regulating endopeptidase homolog, X-linked	protein-coding	5.32	1.27
	chr14-15344	chr14	99420379	99420879	+	5.32	500	Intergenic	Intergenic	121938	NM_009769	12224	Mm.30262	NM_009769	ENSMUSG00000005148	Klf5	4930520J07Rik|Bteb2|CKLF|IKLF	Kruppel-like factor 5	protein-coding	5.32	1.27
	chr15-49393	chr15	44241331	44241831	+	5.32	500	Intergenic	Lx3_Mus|LINE|L1	45446	NM_013696	22045	Mm.309350	NM_013696	ENSMUSG00000038760	Trhr	TRH-R1	thyrotropin releasing hormone receptor	protein-coding	5.32	0.91
	chr2-46027	chr2	90822058	90822558	+	5.32	500	intron (NR_151502, intron 18 of 21)	B4A|SINE|B4	-24847	NM_001317244	56428	Mm.28023	NM_019758	ENSMUSG00000027282	Mtch2	2310034D24Rik|4930539J07Rik|HSPC032	mitochondrial carrier 2	protein-coding	5.32	1.27
	chr10-35004	chr10	70715078	70715578	+	5.32	500	Intergenic	Intergenic	-59365	NR_045292	319646	Mm.483039	NR_045291	ENSMUSG00000037747	D630013N20Rik	-	RIKEN cDNA D630013N20 gene	ncRNA	5.32	1.27
	chr4-38726	chr4	86328583	86329083	+	5.32	500	intron (NM_029967, intron 15 of 27)	intron (NM_029967, intron 15 of 27)	229470	NM_001081096	75811	Mm.56451	NM_001081096	ENSMUSG00000028492	Saxo1	4930500O09Rik|Fam154a	stabilizer of axonemal microtubules 1	protein-coding	5.32	1.27
	chr4-41107	chr4	69739292	69739792	+	5.32	500	Intergenic	MamGypLTR2c|LTR|Gypsy	670893	NM_001313762	214444	Mm.370777	NM_145990	ENSMUSG00000039298	Cdk5rap2	2900018K03Rik|an|mKIAA1633	CDK5 regulatory subunit associated protein 2	protein-coding	5.32	0.91
	chr5-34703	chr5	98220063	98220563	+	5.32	500	Intergenic	B1F|SINE|Alu	-33871	NM_010203	14176	Mm.5055	NM_010203	ENSMUSG00000029337	Fgf5	Fgf-5|HBGF-5|angora|go	fibroblast growth factor 5	protein-coding	5.32	1.09
	chr2-43807	chr2	137144362	137144862	+	5.32	500	Intergenic	L1_Mus3|LINE|L1	-28092	NM_013822	16449	Mm.22398	NM_013822	ENSMUSG00000027276	Jag1	ABE2|Gsfabe2|Htu|Ozz|Ser-1	jagged 1	protein-coding	5.32	0.91
	chr13-21934	chr13	77022273	77022773	+	5.32	500	intron (NM_030174, intron 18 of 20)	intron (NM_030174, intron 18 of 20)	112945	NM_134071	105377	Mm.209730	NM_134071	ENSMUSG00000021597	Slf1	2700017A04Rik|AW545819|Ankrd32|Brctd1|Brctx|C730024G01Rik	SMC5-SMC6 complex localization factor 1	protein-coding	5.32	0.91
	chr9-20068	chr9	43758693	43759193	+	5.32	500	intron (NM_021424, intron 1 of 5)	intron (NM_021424, intron 1 of 5)	14989	NM_021424	58235	Mm.335096	NM_021424	ENSMUSG00000032012	Nectin1	AI835281|AW549174|Cd111|HIgR|HveC|PRR|PRR1|Pvrl1|nectin-1	nectin cell adhesion molecule 1	protein-coding	5.32	1.09
	chrX-6533	chrX	68553315	68553815	+	5.32	500	Intergenic	Intergenic	124834	NR_033481	100038638	Mm.368431	NR_033481	ENSMUSG00000096946	Fmr1os	Asfmr1|Gm10474	fragile X mental retardation 1, opposite strand	ncRNA	5.32	1.09
	chr8-17029	chr8	56861227	56861727	+	5.32	500	Intergenic	Intergenic	310323	NM_001368348	50753	Mm.251174	NM_015791	ENSMUSG00000038206	Fbxo8	Fbx8	F-box protein 8	protein-coding	5.32	1.27
	chr2-47013	chr2	143706414	143706914	+	5.32	500	intron (NM_008792, intron 5 of 11)	intron (NM_008792, intron 5 of 11)	82522	NR_040625	378775	Mm.441313	NR_040625	ENSMUSG00000087115	Pcsk2os2	9430032N09Rik|Gm12360	proprotein convertase subtilisin/kexin type 2, opposite strand 2	ncRNA	5.32	0.91
	chr5-30677	chr5	120698652	120699152	+	5.32	500	intron (NM_008052, intron 2 of 9)	intron (NM_008052, intron 2 of 9)	12767	NM_008052	14357	Mm.1645	NM_008052	ENSMUSG00000029603	Dtx1	Fxit1|mKIAA4160	deltex 1, E3 ubiquitin ligase	protein-coding	5.32	1.27
	chr13-21609	chr13	43696417	43696917	+	5.32	500	Intergenic	CT-rich|Low_complexity|Low_complexity	-20124	NR_046022	622552	Mm.375036	NR_046022	ENSMUSG00000110016	Gm20751	-	predicted gene, 20751	ncRNA	5.32	1.09
	chr10-35363	chr10	87748044	87748544	+	5.32	500	Intergenic	Intergenic	-109971	NM_001314010	16000	Mm.268521	NM_010512	ENSMUSG00000020053	Igf1	C730016P09Rik|Igf-1|Igf-I	insulin-like growth factor 1	protein-coding	5.32	0.91
	chr15-50281	chr15	61306582	61307082	+	5.32	500	Intergenic	Intergenic	-385562	NM_001081067	117586	Mm.291499	NM_001081067	ENSMUSG00000022347	A1bg	C44	alpha-1-B glycoprotein	protein-coding	5.32	1.27
	chr8-17863	chr8	44832145	44832645	+	5.32	500	Intergenic	Intergenic	-117813	NM_001081286	14107	Mm.27365	NM_001081286	ENSMUSG00000070047	Fat1	2310038E12Rik|AU023433|Fath|mFat1	FAT atypical cadherin 1	protein-coding	5.32	1.09
	chr16-15355	chr16	91295439	91295939	+	5.32	500	Intergenic	B4|SINE|B4	25920	NM_016968	50914	Mm.39300	NM_016968	ENSMUSG00000046160	Olig1	AI836478|AW494459|Bhlhb6|Olg-1|Oligo1|bHLHe21	oligodendrocyte transcription factor 1	protein-coding	5.32	1.27
	chr15-48598	chr15	28884636	28885136	+	5.32	500	Intergenic	Intergenic	681120	NM_133365	110082	Mm.248464	NM_133365	ENSMUSG00000022262	Dnah5	AU022615|Dnahc5|Mdnah5|b2b1134Clo|b2b1154Clo|b2b1537Clo|b2b1565Clo|b2b3491Clo|b2b601Clo|mKIAA1603	dynein, axonemal, heavy chain 5	protein-coding	5.32	1.09
	chr1-51670	chr1	174482277	174482777	+	5.32	500	Intergenic	Intergenic	-19298	NM_019445	54418	Mm.330620	NM_019445	ENSMUSG00000028354	Fmn2	AU024104	formin 2	protein-coding	5.32	0.91
	chr13-21022	chr13	4702505	4703005	+	5.32	500	Intergenic	RMER1C|Other|Other	-93591	NM_018859	56043	Mm.251908	NM_018859	ENSMUSG00000045410	Akr1e1	1810061I10Rik|Akr1e2	aldo-keto reductase family 1, member E1	protein-coding	5.32	1.27
	chr18-11097	chr18	49356720	49357220	+	5.32	500	Intergenic	Intergenic	-166319	NR_033785	67321	Mm.245802	NR_033785	ENSMUSG00000100297	1700044K03Rik	-	RIKEN cDNA 1700044K03 gene	ncRNA	5.32	0.91
	chr4-40312	chr4	48493569	48494069	+	5.32	500	Intergenic	RMER17D|LTR|ERVK	-20356	NM_001355740	269536	Mm.272025	NM_172304	ENSMUSG00000028345	Tex10	2610206N19Rik|2810462N03Rik|BC006867	testis expressed gene 10	protein-coding	5.32	0.91
	chr13-19854	chr13	18659990	18660490	+	5.32	500	Intergenic	RLTR10B2|LTR|ERVK	-57052	NM_172120	218035	Mm.27389	NM_172120	ENSMUSG00000041236	Vps41	AI317346|Vam2|mVam2	VPS41 HOPS complex subunit	protein-coding	5.32	1.27
	chr10-36878	chr10	18836020	18836520	+	5.32	500	intron (NR_152783, intron 4 of 4)	intron (NR_152783, intron 4 of 4)	-4340	NR_102728	73968	Mm.55591	NR_038034		4930444F02Rik	1700010L24Rik|mpiR	RIKEN cDNA 4930444F02 gene	ncRNA	5.32	1.09
	chr4-43774	chr4	48823319	48823819	+	5.32	500	Intergenic	Intergenic	160055	NM_026509	68016	Mm.133444	NM_026509	ENSMUSG00000028348	Cavin4	2310039E09Rik|Murc	caveolae associated 4	protein-coding	5.32	1.27
	chr1-47584	chr1	165047798	165048298	+	5.32	500	Intergenic	Intergenic	43882	NR_040480	75857	Mm.109021	NR_040480	ENSMUSG00000102408	4930568G15Rik	-	RIKEN cDNA 4930568G15 gene	ncRNA	5.32	1.27
	chr10-31883	chr10	36916804	36917304	+	5.32	500	Intergenic	Intergenic	-57490	NM_008229	15182	Mm.19806	NM_008229	ENSMUSG00000019777	Hdac2	D10Wsu179e|YAF1|Yy1bp|mRPD3	histone deacetylase 2	protein-coding	5.32	1.09
	chr10-37006	chr10	21879578	21880078	+	5.32	500	Intergenic	ORR1C2|LTR|ERVL-MaLR	-2356	NM_001161845	20393	Mm.28405	NM_011361	ENSMUSG00000019970	Sgk1	Sgk	serum/glucocorticoid regulated kinase 1	protein-coding	5.32	1.27
	chr8-15456	chr8	66736893	66737393	+	5.32	500	Intergenic	L1MA4A|LINE|L1	39721	NM_010934	18166	Mm.5112	NM_010934	ENSMUSG00000036437	Npy1r	NPY1-R|Npyr|Y1-R	neuropeptide Y receptor Y1	protein-coding	5.32	0.91
	chr11-31476	chr11	86022989	86023489	+	5.32	500	intron (NR_046030, intron 1 of 4)	intron (NR_046030, intron 1 of 4)	1111	NR_046030	629393	Mm.372867	NR_046030		Gm20759	-	predicted gene, 20759	ncRNA	5.32	1.27
	chr6-36124	chr6	82709183	82709683	+	5.32	500	Intergenic	Intergenic	-56559	NM_001370295	66979	Mm.195753	NM_025882	ENSMUSG00000030042	Pole4	2400007P05Rik|5830430F06Rik	polymerase (DNA-directed), epsilon 4 (p12 subunit)	protein-coding	5.32	1.27
	chr14-14615	chr14	13174363	13174863	+	5.32	500	intron (NR_121588, intron 2 of 3)	RLTR17|LTR|ERVK	110025	NR_121588	328354	Mm.252404	NM_177813	ENSMUSG00000051729	Gm5087	C630025C03|EG328354	predicted gene 5087	ncRNA	5.32	1.27
	chr11-33263	chr11	101374158	101374658	+	5.32	500	intron (NM_008061, intron 3 of 4)	ORR1D2|LTR|ERVL-MaLR	6692	NM_008061	14377	Mm.18064	NM_008061	ENSMUSG00000078650	G6pc	AW107337|G6Pase|G6pt|Glc-6-Pase	glucose-6-phosphatase, catalytic	protein-coding	5.32	1.09
	chr2-46845	chr2	134367243	134367743	+	5.32	500	Intergenic	L1MB1|LINE|L1	186859	NM_010403	15112	Mm.26634	NM_010403	ENSMUSG00000027261	Hao1	GOX|Gox1|Hao-1	hydroxyacid oxidase 1, liver	protein-coding	5.32	1.27
	chr11-32247	chr11	28776028	28776528	+	5.32	500	Intergenic	L1_Mus1|LINE|L1	12550	NR_029828	387213		NR_029828	ENSMUSG00000065415	Mir217	Mirn217|mir-217|mmu-mir-217	microRNA 217	ncRNA	5.32	1.27
	chr3-35698	chr3	151670404	151670904	+	5.32	500	Intergenic	MLT2B2|LTR|ERVL	79256	NM_001370771	99899	Mm.30756	NM_133871	ENSMUSG00000028037	Ifi44	A430056A10Rik|AW261460|MTAP44|p44	interferon-induced protein 44	protein-coding	5.32	1.27
	chr9-19386	chr9	80386090	80386590	+	5.32	500	intron (NM_022016, intron 8 of 16)	intron (NM_022016, intron 8 of 16)	79098	NM_022016	63859	Mm.422780	NM_022016	ENSMUSG00000032343	Impg1	A930015H12Rik|IMP150|SPACR	interphotoreceptor matrix proteoglycan 1	protein-coding	5.32	1.27
	chr15-44480	chr15	26620263	26620763	+	5.32	500	intron (NM_176959, intron 2 of 3)	intron (NM_176959, intron 2 of 3)	275051	NM_176959	448987	Mm.253378	NM_176959	ENSMUSG00000043556	Fbxl7	AL023057|D230018M15Rik|FBL7|Fbl6	F-box and leucine-rich repeat protein 7	protein-coding	5.32	1.27
	chr10-39417	chr10	125874163	125874663	+	5.32	500	Intergenic	RMER13A1|LTR|ERVK	-91806	NM_177152	320398	Mm.275586	NM_177152	ENSMUSG00000020105	Lrig3	9030421L11Rik|9130004I02Rik|9430095K15Rik|mKIAA3016	leucine-rich repeats and immunoglobulin-like domains 3	protein-coding	5.32	1.27
	chr10-32393	chr10	70083675	70084175	+	5.32	500	Intergenic	Intergenic	-13196	NM_001111121	76551	Mm.281741	NM_001111121	ENSMUSG00000048701	Ccdc6	2810012H18Rik|AA536681|AA960498|AW061011	coiled-coil domain containing 6	protein-coding	5.32	1.09
	chr16-15638	chr16	17600280	17600780	+	5.32	500	Intergenic	PB1D9|SINE|Alu	-18824	NM_001164609	77626	Mm.34659	NM_029945	ENSMUSG00000005899	Smpd4	4122402O22Rik	sphingomyelin phosphodiesterase 4	protein-coding	5.32	1.09
	chr1-54055	chr1	82043283	82043783	+	5.32	500	Intergenic	Intergenic	-88383	NR_105762	102466629		NR_105762	ENSMUSG00000098797	Mir6344	Gm27840|mmu-mir-6344	microRNA 6344	ncRNA	5.32	1.27
	chr2-43238	chr2	107715874	107716374	+	5.32	500	Intergenic	Intergenic	425535	NM_021275	16492	Mm.142718	NM_021275	ENSMUSG00000042604	Kcna4	Kv1.4	potassium voltage-gated channel, shaker-related subfamily, member 4	protein-coding	5.32	0.91
	chr1-42368	chr1	45132118	45132618	+	5.32	500	Intergenic	Intergenic	-179170	NM_009930	12825	Mm.249555	NM_009930	ENSMUSG00000026043	Col3a1	AW550625|Col3a-1|Tsk-2|Tsk2	collagen, type III, alpha 1	protein-coding	5.32	1.27
	chr13-19525	chr13	110784656	110785156	+	5.32	500	Intergenic	MER63B|DNA|hAT-Blackjack	-118593	NR_131193	75139	Mm.490931	NR_131193	ENSMUSG00000114472	Gm38397	-	predicted gene, 38397	ncRNA	5.32	1.27
	chr9-18044	chr9	51189633	51190133	+	5.32	500	Intergenic	PB1D9|SINE|Alu	-23807	NM_011136	18985	Mm.897	NM_011136	ENSMUSG00000032053	Pou2af1	BOB.1|Bob-1|Bob1|OBF-1|OBF.1|OCA-B|OCAB	POU domain, class 2, associating factor 1	protein-coding	5.32	1.09
	chr3-41168	chr3	122873095	122873595	+	5.32	500	Intergenic	MLTR14|LTR|ERV1	-21727	NM_007980	14079	Mm.28398	NM_007980	ENSMUSG00000023057	Fabp2	Fabpi|I-FABP	fatty acid binding protein 2, intestinal	protein-coding	5.32	1.27
	chr19-17102	chr19	6652413	6652913	+	5.32	500	Intergenic	Intergenic	-109593	NM_009203	20521	Mm.391146	NM_009203	ENSMUSG00000061742	Slc22a12	AI987855|OAT4L|Rst|Slc22al2|URAT1	solute carrier family 22 (organic anion/cation transporter), member 12	protein-coding	5.32	1.27
	chr17-35182	chr17	27554139	27554639	+	5.32	500	Intergenic	Intergenic	-2185	NM_001166543	15361	Mm.4438	NM_016660	ENSMUSG00000046711	Hmga1	AL023995|Hmga1a|Hmga1b|Hmgi|Hmgiy|Hmgy	high mobility group AT-hook 1	protein-coding	5.32	1.09
	chr3-38393	chr3	147082002	147082502	+	5.32	500	Intergenic	Intergenic	229885	NM_001302958	70892	Mm.187793	NM_027594	ENSMUSG00000036745	Ttll7	1110049N09Rik|4921517B04Rik|C630030B20|mTTLL7	tubulin tyrosine ligase-like family, member 7	protein-coding	5.32	1.09
	chr19-19371	chr19	56653065	56653565	+	5.13	500	Intergenic	Intergenic	-68802	NM_007419	11554	Mm.46797	NM_007419	ENSMUSG00000035283	Adrb1	Adrb-1|beta-AR	adrenergic receptor, beta 1	protein-coding	5.13	1.27
	chr3-47518	chr3	56184388	56184888	+	5.13	500	promoter-TSS (NM_030595)	promoter-TSS (NM_030595)	-937	NM_030595	26422	Mm.384353	NM_030595	ENSMUSG00000027799	Nbea	Lyst2|mKIAA1544	neurobeachin	protein-coding	5.13	1.27
	chr17-42025	chr17	27429567	27430067	+	5.13	500	intron (NM_001360192, intron 9 of 9)	intron (NM_001360192, intron 9 of 9)	66717	NM_001360192	268934	Mm.358940	NM_001013385	ENSMUSG00000063239	Grm4	Gprc1d|mGluR4	glutamate receptor, metabotropic 4	protein-coding	5.13	1.09
	chr19-18964	chr19	34114223	34114723	+	5.13	500	intron (NM_023903, intron 5 of 9)	intron (NM_023903, intron 5 of 9)	13530	NM_023903	78753	Mm.195937	NM_023903	ENSMUSG00000056078	Lipm	4632427C23Rik|AW227514|Lipl3	lipase, family member M	protein-coding	5.13	1.27
	chr15-47808	chr15	5010400	5010900	+	5.13	500	intron (NM_001243837, intron 12 of 17)	MIRc|SINE|MIR	53123	NM_001243837	109828	Mm.208034	NM_001243837	ENSMUSG00000079105	C7	A530026G17|Gm1238	complement component 7	protein-coding	5.13	1.27
	chr4-47257	chr4	136097078	136097578	+	5.13	500	Intergenic	Intergenic	-43935	NM_025919	67025	Mm.276856	NM_025919	ENSMUSG00000059291	Rpl11	2010203J19Rik	ribosomal protein L11	protein-coding	5.13	0.91
	chr10-39512	chr10	3498015	3498515	+	5.13	500	Intergenic	MTD|LTR|ERVL-MaLR	-42009	NM_027391	70337	Mm.24153	NM_027391	ENSMUSG00000019762	Iyd	0610009A07Rik|AI265638|Dehal1|IYD-1	iodotyrosine deiodinase	protein-coding	5.13	1.27
	chr11-36121	chr11	62865634	62866134	+	5.13	500	intron (NM_001291441, intron 8 of 12)	intron (NM_001291441, intron 8 of 12)	-13571	NM_001356520	67510	Mm.9806	NM_026210	ENSMUSG00000014177	Tvp23b	1810036I24Rik|Fam18b|Fam18b1	trans-golgi network vesicle protein 23B	protein-coding	5.13	1.09
	chr7-32582	chr7	144908610	144909110	+	5.13	500	Intergenic	MLT1J|LTR|ERVL-MaLR	-6240	NM_001357869	72284	Mm.273049	NM_028184	ENSMUSG00000031072	LTO1	2210010N10Rik|Oraov1|TAOS1	ABCE maturation factor	protein-coding	5.13	1.09
	chr2-51151	chr2	165434783	165435283	+	5.13	500	intron (NM_054055, intron 4 of 12)	intron (NM_054055, intron 4 of 12)	-34639	NM_029021	74614	Mm.72179	NM_029021	ENSMUSG00000027670	Ocstamp	4833422F24Rik|OC-STAMP	osteoclast stimulatory transmembrane protein	protein-coding	5.13	1.27
	chr5-34481	chr5	77874002	77874502	+	5.13	500	Intergenic	Intergenic	408764	NR_131050	69370	Mm.426881	NR_131050	ENSMUSG00000107232	1700017L05Rik	-	RIKEN cDNA 1700017L05 gene	ncRNA	5.13	0.91
	chr1-53106	chr1	50917106	50917606	+	5.13	500	Intergenic	RMER20A|LTR|ERVK	-10167	NM_019790	56363	Mm.245154	NM_019790	ENSMUSG00000026109	Tmeff2	4832418D20Rik|7630402F16Rik|TR-2	transmembrane protein with EGF-like and two follistatin-like domains 2	protein-coding	5.13	1.27
	chr10-35835	chr10	108426005	108426505	+	5.13	500	intron (NR_155870, intron 1 of 2)	intron (NR_155870, intron 1 of 2)	9004	NR_155870	102640148	Mm.336104	NR_155870	ENSMUSG00000112532	Gm36283	-	predicted gene, 36283	ncRNA	5.13	1.27
	chr13-24636	chr13	26871949	26872449	+	5.13	500	Intergenic	Intergenic	-102034	NM_008232	15192	Mm.7411	NM_008232	ENSMUSG00000045835	Hdgfl1	4921520N01Rik|HRP-1|Hdgfrp1|Pwwp1	HDGF like 1	protein-coding	5.13	0.91
	chr1-49038	chr1	51448286	51448786	+	5.13	500	Intergenic	Intergenic	29863	NM_001310549	109019	Mm.196290	NM_028696	ENSMUSG00000026107	Nabp1	4930434H03Rik|4930442A21Rik|4930488J04Rik|4933440J18Rik|5830411E10Rik|AI852561|Nbp1|Obfc2a|Ssb2	nucleic acid binding protein 1	protein-coding	5.13	1.09
	chr3-36796	chr3	62047254	62047754	+	5.13	500	Intergenic	Intergenic	-291273	NM_001081295	622434	Mm.153974	NM_001081295	ENSMUSG00000036885	Arhgef26	4631416L12Rik|8430436L14Rik|AI303572|AW491953|SGEF	Rho guanine nucleotide exchange factor (GEF) 26	protein-coding	5.13	1.09
	chr17-36081	chr17	56661217	56661717	+	5.13	500	intron (NM_175350, intron 19 of 21)	intron (NM_175350, intron 19 of 21)	-11758	NM_027933	71810	Mm.29608	NM_027933	ENSMUSG00000002372	Ranbp3	2610024N24Rik|AA408221	RAN binding protein 3	protein-coding	5.13	1.27
	chr13-21764	chr13	59956619	59957119	+	5.13	500	Intergenic	Intergenic	-72842	NR_046142	328263	Mm.123405	NR_046142	ENSMUSG00000114531	A530065N20Rik	A530065N20	RIKEN cDNA A530046M15 gene	ncRNA	5.13	1.27
	chr10-44820	chr10	40593321	40593821	+	5.13	500	intron (NM_027572, intron 6 of 7)	intron (NM_027572, intron 6 of 7)	23209	NM_027572	70840	Mm.332570	NM_027572	ENSMUSG00000019834	Slc22a16	4921504E14Rik|CT2|FLIPT2|OCT6|OKB1	solute carrier family 22 (organic cation transporter), member 16	protein-coding	5.13	1.27
	chr5-35828	chr5	16401552	16402052	+	5.13	500	Intergenic	RMER17C2|LTR|ERVK	-151693	NM_010427	15234	Mm.267078	NM_010427	ENSMUSG00000028864	Hgf	C230052L06Rik|HGF/SF|NK1|NK2|SF|SF/HGF	hepatocyte growth factor	protein-coding	5.13	1.09
	chr10-35867	chr10	108780504	108781004	+	5.13	500	intron (NM_001252342, intron 3 of 10)	intron (NM_001252342, intron 3 of 10)	-80594	NM_203660	368203	Mm.452758	NM_203660	ENSMUSG00000112039	Gm5136	C6.1AL|EG368203	predicted gene 5136	protein-coding	5.13	1.27
	chr11-32682	chr11	69181277	69181777	+	5.13	500	Intergenic	Intergenic	16316	NM_009661	11688	Mm.289672	NM_009661	ENSMUSG00000020891	Alox8	15-LOX-2|15-LOX-B|8-LOX|8S-LOX|Alox15b	arachidonate 8-lipoxygenase	protein-coding	5.13	1.09
	chr13-22619	chr13	13053842	13054342	+	5.13	500	Intergenic	Lx|LINE|L1	-48699	NM_031191	18811	Mm.88796	NM_031191	ENSMUSG00000079092	Prl2c2	Ghd2|MRP-1|PLF-1|Plf|Plf1	prolactin family 2, subfamily c, member 2	protein-coding	5.13	1.27
	chr7-34680	chr7	127207326	127207826	+	5.13	500	exon (NM_144522, exon 1 of 9)	exon (NM_144522, exon 1 of 9)	892	NM_144522	68449	Mm.41420	NM_144522	ENSMUSG00000042492	Tbc1d10b	1110003P22Rik|C87963	TBC1 domain family, member 10b	protein-coding	5.13	1.27
	chr1-50331	chr1	104881899	104882399	+	5.13	500	intron (NM_011800, intron 1 of 11)	RMER17B|LTR|ERVK	113629	NM_011800	23836	Mm.103640	NM_011800	ENSMUSG00000050840	Cdh20	Cdh7	cadherin 20	protein-coding	5.13	1.09
	chr1-42084	chr1	20952363	20952863	+	5.13	500	intron (NM_027974, intron 1 of 10)	intron (NM_027974, intron 1 of 10)	987	NM_027974	71877	Mm.29178	NM_027974	ENSMUSG00000041809	Efhc1	1700029F22Rik|mRib72-1|myoclonin1	EF-hand domain (C-terminal) containing 1	protein-coding	5.13	1.27
	chr9-19858	chr9	23787126	23787626	+	5.13	500	Intergenic	Intergenic	-310642	NM_175678	319239	Mm.130824	NM_175678	ENSMUSG00000043659	Npsr1	9330128H10Rik|GPRA|Gpr154|MVTR|PGR14|VRR1	neuropeptide S receptor 1	protein-coding	5.13	1.27
	chr4-48257	chr4	61178913	61179413	+	5.13	500	Intergenic	ERVB7_2B-LTR_MM|LTR|ERVK	49064	NM_001347134	100039089	Mm.443549	NM_001134674	ENSMUSG00000089873	Mup13	Gm13513|Mup11	major urinary protein 13	protein-coding	5.13	1.09
	chr3-32612	chr3	122162355	122162855	+	5.13	500	intron (NM_007378, intron 41 of 49)	intron (NM_007378, intron 41 of 49)	-82952	NM_008129	14630	Mm.292676	NM_008129	ENSMUSG00000028124	Gclm	AI649393|Gcmc|Glclr	glutamate-cysteine ligase, modifier subunit	protein-coding	5.13	1.27
	chr13-22703	chr13	18172232	18172732	+	5.13	500	exon (NM_175006, exon 4 of 8)	exon (NM_175006, exon 4 of 8)	-72280	NR_046032	73992	Mm.159110	NR_046032	ENSMUSG00000113470	4930448F12Rik	-	RIKEN cDNA 4930448F12 gene	ncRNA	5.13	0.91
	chr17-35600	chr17	43422636	43423136	+	5.13	500	intron (NM_001357332, intron 4 of 20)	intron (NM_001357332, intron 4 of 20)	33420	NM_001081178	224792	Mm.23478	NM_001081178	ENSMUSG00000056492	Adgrf5	8430401C09Rik|9330185D23|AI528491|Gpr116|mKIAA0758	adhesion G protein-coupled receptor F5	protein-coding	5.13	0.73
	chr7-34751	chr7	131812538	131813038	+	5.13	500	Intergenic	Intergenic	-153672	NM_173410	233919	Mm.208740	NM_173410	ENSMUSG00000040125	Gpr26	9630036A11Rik|A730021D22	G protein-coupled receptor 26	protein-coding	5.13	1.27
	chr6-33865	chr6	117434484	117434984	+	5.13	500	Intergenic	Intergenic	-60501	NR_152214	100126203	Mm.217172	NR_152214		6820426E19Rik	Gm43983	RIKEN cDNA 6820426E19 gene	ncRNA	5.13	1.27
	chr15-51555	chr15	90808224	90808724	+	5.13	500	Intergenic	Intergenic	90002	NR_033583	20738	Mm.431547	NR_033583	ENSMUSG00000116210	Spn-ps	Cd43-ps	sialophorin, pseudogene	pseudo	5.13	1.27
	chr10-40981	chr10	42003455	42003955	+	5.13	500	intron (NM_001034858, intron 3 of 17)	B4A|SINE|B4	14677	NM_001034858	213402	Mm.211320	NM_001034858	ENSMUSG00000071324	Armc2	2610018I05Rik	armadillo repeat containing 2	protein-coding	5.13	1.27
	chr1-45910	chr1	71261277	71261777	+	5.13	500	intron (NM_175210, intron 44 of 52)	intron (NM_175210, intron 44 of 52)	153383	NM_175210	74591	Mm.159251	NM_175210	ENSMUSG00000050296	Abca12	4832428G11Rik|4833417A11Rik	ATP-binding cassette, sub-family A (ABC1), member 12	protein-coding	5.13	1.27
	chr15-41681	chr15	47955147	47955647	+	5.13	500	intron (NM_001081391, intron 19 of 70)	intron (NM_001081391, intron 19 of 70)	836592	NM_001081391	239420	Mm.309363	NM_001081391	ENSMUSG00000022311	Csmd3	4930500N14Rik|mKIAA1894	CUB and Sushi multiple domains 3	protein-coding	5.13	1.27
	chr4-44875	chr4	74206934	74207434	+	5.13	500	Intergenic	MurERV4_19-int|LTR|ERVK	-35313	NM_001172095	76804	Mm.209059	NM_144787	ENSMUSG00000028397	Kdm4c	2410141F18Rik|AA517467|Gasc1|Jmjd2c	lysine (K)-specific demethylase 4C	protein-coding	5.13	1.27
	chr15-47985	chr15	6934187	6934687	+	5.13	500	Intergenic	Intergenic	-60124	NM_011019	18414	Mm.10760	NM_011019	ENSMUSG00000022146	Osmr	OSMRB	oncostatin M receptor	protein-coding	5.13	1.27
	chr17-35883	chr17	51316868	51317368	+	5.13	500	intron (NR_037264, intron 3 of 4)	intron (NR_037264, intron 3 of 4)	39130	NR_037264	100526494		NR_037264	ENSMUSG00000105365	Mir669a-10	mmu-mir-669a-10	microRNA 669a-10	ncRNA	5.13	1.27
	chr11-35550	chr11	11814877	11815377	+	5.13	500	intron (NM_001190448, intron 14 of 14)	intron (NM_001190448, intron 14 of 14)	-6165	NM_001163360	60530	Mm.236114	NM_021891	ENSMUSG00000035455	Fignl1	-	fidgetin-like 1	protein-coding	5.13	1.27
	chr1-42155	chr1	29980502	29981002	+	5.13	500	Intergenic	L1Md_F2|LINE|L1	158084	NR_157037	102633704		NR_157037		Gm31465	-	predicted gene, 31465	ncRNA	5.13	1.27
	chr14-14987	chr14	52325902	52326402	+	5.13	500	intron (NM_015772, intron 1 of 1)	intron (NM_015772, intron 1 of 1)	2518	NM_015772	50524	Mm.39487	NM_015772	ENSMUSG00000049532	Sall2	AI225809|AW559097|Msal-2|Sal-2|mKIAA0360|p150(Sal2)	spalt like transcription factor 2	protein-coding	5.13	0.91
	chr6-34353	chr6	145073367	145073867	+	5.13	500	intron (NM_007532, intron 1 of 10)	RMER6A|LTR|ERVK	2540	NM_007532	12035	Mm.4606	NM_007532	ENSMUSG00000030268	Bcat1	BCATc|Eca39	branched chain aminotransferase 1, cytosolic	protein-coding	5.13	1.09
	chr9-20502	chr9	80012190	80012690	+	5.13	500	intron (NM_001357352, intron 1 of 5)	intron (NM_001357352, intron 1 of 5)	411	NM_001357352	70598	Mm.23049	NM_001081243	ENSMUSG00000034898	Filip1	5730485H21Rik|AI843021	filamin A interacting protein 1	protein-coding	5.13	1.27
	chr18-11915	chr18	64044096	64044596	+	5.13	500	Intergenic	Intergenic	-210013	NM_009182	20451	Mm.252110	NM_009182	ENSMUSG00000056812	St8sia3	AI847333|ST8SiaIII|Siat8c	ST8 alpha-N-acetyl-neuraminide alpha-2,8-sialyltransferase 3	protein-coding	5.13	1.27
	chr17-34994	chr17	21260158	21260658	+	5.13	500	promoter-TSS (NM_134199)	promoter-TSS (NM_134199)	-19	NM_134199	171233	Mm.222636	NM_134199	ENSMUSG00000050102	Vmn1r235	V1rf2	vomeronasal 1 receptor 235	protein-coding	5.13	0.91
	chr17-39812	chr17	66553311	66553811	+	5.13	500	TTS (NM_028998)	TTS (NM_028998)	-33891	NM_024448	19328	Mm.248313	NM_024448	ENSMUSG00000023460	Rab12	2900054P15Rik|AW555448|C77700	RAB12, member RAS oncogene family	protein-coding	5.13	0.73
	chr1-47138	chr1	149169702	149170202	+	5.13	500	Intergenic	B1_Mur4|SINE|Alu	752487	NM_001305632	18783	Mm.4186	NM_008869	ENSMUSG00000056220	Pla2g4a	Pla2g4|cPLA2|cPLA2-alpha|cPLA2alpha	phospholipase A2, group IVA (cytosolic, calcium-dependent)	protein-coding	5.13	1.09
	chr19-17959	chr19	50178460	50178960	+	5.13	500	intron (NM_001360457, intron 21 of 26)	MER67D|LTR|ERV1	499936	NM_021377	58178	Mm.313672	NM_021377	ENSMUSG00000043531	Sorcs1	Sorcs|mSorCS	sortilin-related VPS10 domain containing receptor 1	protein-coding	5.13	1.09
	chr3-38917	chr3	9914025	9914525	+	5.13	500	Intergenic	Intergenic	-80596	NM_053182	94212	Mm.23897	NM_053182	ENSMUSG00000027508	Pag1	Cbp|F730007C19Rik|Pag	phosphoprotein associated with glycosphingolipid microdomains 1	protein-coding	5.13	1.27
	chr10-35698	chr10	98771840	98772340	+	5.13	500	Intergenic	L1MC2|LINE|L1	-142552	NM_001359509	67972	Mm.166944	NM_026482	ENSMUSG00000019943	Atp2b1	2810442I22Rik|E130111D10Rik|Pmca1	ATPase, Ca++ transporting, plasma membrane 1	protein-coding	5.13	1.27
	chr15-51219	chr15	80571760	80572260	+	5.13	500	promoter-TSS (NM_001289442)	promoter-TSS (NM_001289442)	-587	NM_001289442	17444	Mm.12947	NM_010815	ENSMUSG00000042351	Grap2	GRAP-2|GRB2L|GRBLG|GRID|Gads|GrbX|Grf40|GrpL|Mona|P38	GRB2-related adaptor protein 2	protein-coding	5.13	1.27
	chr19-17146	chr19	8215710	8216210	+	5.13	500	intron (NM_001347426, intron 2 of 9)	RMER15|LTR|ERVL	2940	NM_172776	236293	Mm.440581	NM_172776	ENSMUSG00000075044	Slc22a29	D630002G06Rik	solute carrier family 22. member 29	protein-coding	5.13	1.27
	chr11-36329	chr11	71841603	71842103	+	5.13	500	Intergenic	Intergenic	90838	NM_001357965	216881	Mm.48648	NM_177618	ENSMUSG00000020811	Wscd1	mKIAA0523	WSC domain containing 1	protein-coding	5.13	1.09
	chr15-41234	chr15	37146324	37146824	+	5.13	500	Intergenic	Intergenic	-86462	NM_026496	252973	Mm.244612	NM_026496	ENSMUSG00000022286	Grhl2	0610015A08Rik|BOM|Tcfcp2l3|clft3	grainyhead like transcription factor 2	protein-coding	5.13	1.27
	chr3-48546	chr3	93053199	93053699	+	5.13	500	Intergenic	T-rich|Low_complexity|Low_complexity	-15374	NM_001034860	229571	Mm.331194	NM_001034860	ENSMUSG00000096879	Gm4858	EG229571	predicted gene 4858	protein-coding	5.13	1.27
	chr9-19776	chr9	18524703	18525203	+	5.13	500	Intergenic	Intergenic	46594	NM_001357419	73503	Mm.160088	NM_028557	ENSMUSG00000038691	Mbd3l1	1700070G05Rik|1700095H13Rik|Mbd3l	methyl-CpG binding domain protein 3-like 1	protein-coding	5.13	1.09
	chr15-56159	chr15	79273811	79274311	+	5.13	500	intron (NM_177580, intron 4 of 13)	intron (NM_177580, intron 4 of 13)	11448	NM_177580	207495	Mm.309647	NM_177580	ENSMUSG00000018126	Baiap2l2	BC048937	BAI1-associated protein 2-like 2	protein-coding	5.13	1.09
	chr10-42945	chr10	118824645	118825145	+	5.13	500	Intergenic	Intergenic	44008	NM_001014390	69181	Mm.45565	NM_001014390	ENSMUSG00000028630	Dyrk2	1810038L18Rik	dual-specificity tyrosine-(Y)-phosphorylation regulated kinase 2	protein-coding	5.13	1.27
	chr4-52151	chr4	14158408	14158908	+	5.13	500	Intergenic	L1_Mus1|LINE|L1	132651	NR_131155	100040030	Mm.366499	NR_131155		Gm2560	-	predicted gene 2560	ncRNA	5.13	1.09
	chr15-48715	chr15	31443196	31443696	+	5.13	500	exon (NM_145852, exon 4 of 5)	exon (NM_145852, exon 4 of 5)	10243	NM_145852	252967	Mm.436668	NM_145852	ENSMUSG00000022236	Ropn1l	ASP|AV047578|Akapasp	ropporin 1-like	protein-coding	5.13	1.27
	chr8-19298	chr8	86904207	86904707	+	5.13	500	Intergenic	RMER10B|LTR|ERVL	-19199	NM_030563	80750	Mm.25117	NM_030563	ENSMUSG00000031652	N4bp1	AI481586|C81621	NEDD4 binding protein 1	protein-coding	5.13	0.73
	chr10-35760	chr10	102124029	102124529	+	5.13	500	intron (NM_001205098, intron 3 of 7)	intron (NM_001205098, intron 3 of 7)	-34579	NM_001162368	67569	Mm.25252	NM_026243	ENSMUSG00000019888	Mgat4c	9130411I17Rik|GntIVh	MGAT4 family, member C	protein-coding	5.13	0.91
	chr10-32826	chr10	96075203	96075703	+	5.13	500	Intergenic	Intergenic	134790	NM_001001932	216238	Mm.210035	NM_001001932	ENSMUSG00000036499	Eea1	A430109M19Rik|B230358H09Rik|ZFYVE2	early endosome antigen 1	protein-coding	5.13	1.09
	chr17-40913	chr17	94154366	94154866	+	5.13	500	Intergenic	L1_Mus3|LINE|L1	595403	NM_001357137	76781	Mm.139146	NM_176917	ENSMUSG00000055660	Mettl4	2410198H06Rik|A730091E08Rik|AV296509|HsT661	methyltransferase like 4	protein-coding	5.13	1.27
	chr13-23359	chr13	58588193	58588693	+	5.13	500	intron (NM_022317, intron 1 of 17)	intron (NM_022317, intron 1 of 17)	22434	NM_022317	114304	Mm.18188	NM_022317	ENSMUSG00000021553	Slc28a3	Cnt3	solute carrier family 28 (sodium-coupled nucleoside transporter), member 3	protein-coding	5.13	1.09
	chr5-31712	chr5	49160946	49161446	+	5.13	500	intron (NM_001199244, intron 1 of 7)	intron (NM_001199244, intron 1 of 7)	124463	NM_001199244	80334	Mm.160172	NM_030265	ENSMUSG00000029088	Kcnip4	AV032399|Calp|Calp250|KChIP4|KChIP4a	Kv channel interacting protein 4	protein-coding	5.13	1.27
	chr1-50666	chr1	133667585	133668085	+	5.13	500	Intergenic	RLTR12D|LTR|ERVK	-6436	NM_001276767	70579	Mm.245357	NM_144530	ENSMUSG00000102976	Zc3h11a	1110003F06Rik|5730454B08Rik|G630041M05Rik|Zc3hdc11a|Zc3hh11a|mKIAA0663	zinc finger CCCH type containing 11A	protein-coding	5.13	1.09
	chr16-16708	chr16	18543699	18544199	+	5.13	500	intron (NM_001285491, intron 4 of 7)	intron (NM_001285491, intron 4 of 7)	43020	NM_011532	21380	Mm.295194	NM_011532	ENSMUSG00000009097	Tbx1	-	T-box 1	protein-coding	5.13	1.27
	chr11-34075	chr11	55865968	55866468	+	5.13	500	Intergenic	Intergenic	174769	NM_153079	216749	Mm.213205	NM_153079	ENSMUSG00000037393	Nmur2	Nmu2r	neuromedin U receptor 2	protein-coding	5.13	0.91
	chr10-36898	chr10	19319265	19319765	+	5.13	500	Intergenic	Intergenic	-37024	NM_053008	94222	Mm.156946	NM_053008	ENSMUSG00000045591	Olig3	Bhlhb7|bHLHe20|oligo3	oligodendrocyte transcription factor 3	protein-coding	5.13	1.09
	chr7-33369	chr7	51040943	51041443	+	5.13	500	Intergenic	Intergenic	442003	NM_172901	243996	Mm.443270	NM_172901	ENSMUSG00000084234	4933405O20Rik	-	RIKEN cDNA 4933405O20 gene	protein-coding	5.13	1.09
	chr5-34745	chr5	100726566	100727066	+	5.13	500	Intergenic	RLTR10D|LTR|ERVK	-7100	NM_152803	15442	Mm.265786	NM_152803	ENSMUSG00000035273	Hpse	HSE1|Hpa|Hpr1	heparanase	protein-coding	5.13	1.09
	chr1-48951	chr1	46249332	46249832	+	5.13	500	intron (NM_001368717, intron 45 of 64)	intron (NM_001368717, intron 45 of 64)	-175936	NM_001310335	100101919	Mm.383402	NM_001310335	ENSMUSG00000101337	Dnah7c	Dnahc7c	dynein, axonemal, heavy chain 7C	protein-coding	5.13	0.91
	chr9-20848	chr9	121901626	121902126	+	5.13	500	intron (NM_021609, intron 1 of 2)	intron (NM_021609, intron 1 of 2)	3521	NM_021609	59289	Mm.258105	NM_021609	ENSMUSG00000044534	Ackr2	AI464239|CCR10|CCR9|Ccbp2|Cmkbr9|D6	atypical chemokine receptor 2	protein-coding	5.13	1.09
	chr19-17453	chr19	24482979	24483479	+	5.13	500	intron (NM_008846, intron 1 of 14)	intron (NM_008846, intron 1 of 14)	-5755	NM_026520	68034	Mm.440181	NM_026520	ENSMUSG00000074922	Fam122a	2410124L17Rik|2900009I07Rik|Gm9849	family with sequence similarity 122, member A	protein-coding	5.13	1.27
	chr12-20379	chr12	72527274	72527774	+	5.13	500	Intergenic	Intergenic	-8833	NM_026327	67708	Mm.11233	NM_026327	ENSMUSG00000034501	Pcnx4	1810048J11Rik|4932413O10|AU017192|Pcnxl4	pecanex homolog 4	protein-coding	5.13	1.09
	chr10-41371	chr10	66745428	66745928	+	5.13	500	Intergenic	IMPB_01|Satellite|Satellite	174706	NR_138560	68488	Mm.338835	NR_138560		1110002J07Rik	-	RIKEN cDNA 1110002J07 gene	ncRNA	5.13	1.27
	chr10-38181	chr10	77214591	77215091	+	5.13	500	Intergenic	Intergenic	44382	NR_026944	100169878	Mm.420901	NR_026944	ENSMUSG00000078444	Gm10941	-	predicted gene 10941	ncRNA	5.13	1.27
	chr10-39606	chr10	6931406	6931906	+	5.13	500	intron (NM_001033391, intron 6 of 7)	intron (NM_001033391, intron 6 of 7)	48625	NM_001347225	320495	Mm.331674	NM_001033391	ENSMUSG00000064065	Ipcef1	A130090K04Rik	interaction protein for cytohesin exchange factors 1	protein-coding	5.13	1.09
	chr17-39408	chr17	55351234	55351734	+	5.13	500	Intergenic	Intergenic	-93898	NM_001347403	240119	Mm.311687	NM_172829	ENSMUSG00000024172	St6gal2	C230064G14Rik|St6galII|mKIAA1877	beta galactoside alpha 2,6 sialyltransferase 2	protein-coding	5.13	1.27
	chr16-17527	chr16	92544030	92544530	+	5.13	500	Intergenic	Intergenic	46133	NM_172469	209195	Mm.44747	NM_172469	ENSMUSG00000022949	Clic6	5730466J16Rik|AL022908|AW045520|CLIC1L	chloride intracellular channel 6	protein-coding	5.13	0.91
	chr18-12469	chr18	46812817	46813317	+	5.13	500	Intergenic	Intergenic	-36972	NM_029008	74574	Mm.26379	NM_029008	ENSMUSG00000024481	Lvrn	4833403I15Rik|APQ|Aqpep	laeverin	protein-coding	5.13	1.09
	chr6-28110	chr6	16115919	16116419	+	5.13	500	Intergenic	RMER6C|LTR|ERVK	395508	NM_175088	16543	Mm.1314	NM_175088	ENSMUSG00000041390	Mdfic	Kdt1|Mdfid	MyoD family inhibitor domain containing	protein-coding	5.13	1.27
	chr16-16527	chr16	9280039	9280539	+	5.13	500	Intergenic	Intergenic	450189	NM_001081400	69053	Mm.390868	NM_001081400	ENSMUSG00000022507	1810013L24Rik	1110017P05Rik|3010002C02Rik|AA792997|AW124177|Gm19906|R74903	RIKEN cDNA 1810013L24 gene	protein-coding	5.13	1.27
	chr5-41057	chr5	119283569	119284069	+	5.13	500	Intergenic	L1MDa|LINE|L1	-83801	NR_046033	665194	Mm.491047	NR_046033	ENSMUSG00000107334	Gm7538	EG665194	predicted gene 7538	ncRNA	5.13	1.27
	chr2-48385	chr2	37058915	37059415	+	5.13	500	Intergenic	L1_Mus1|LINE|L1	-9142	NM_146622	258615	Mm.271468	NM_146622	ENSMUSG00000083361	Olfr360	MOR159-1	olfactory receptor 360	protein-coding	5.13	1.27
	chrX-6999	chrX	153668648	153669148	+	5.13	500	Intergenic	RMER5|LTR|ERV1	27382	NM_175429	207474	Mm.271572	NM_175429	ENSMUSG00000041633	Kctd12b	9530071H11Rik|B430319H24Rik	potassium channel tetramerisation domain containing 12b	protein-coding	5.13	1.27
	chr14-13864	chr14	23253737	23254237	+	5.13	500	Intergenic	Intergenic	-159416	NR_033550	791307	Mm.364384	NR_033550	ENSMUSG00000068680	Gm10248	-	predicted gene 10248	ncRNA	5.13	1.09
	chr13-25540	chr13	84070665	84071165	+	5.13	500	Intergenic	L1MA6|LINE|L1	-6141	NR_131220	553095	Mm.39702	NR_131220	ENSMUSG00000098087	Gm17750	-	predicted gene, 17750	ncRNA	5.13	1.27
	chr1-49955	chr1	84710069	84710569	+	5.13	500	Intergenic	Intergenic	-14098	NM_152915	227325	Mm.292560	NM_152915	ENSMUSG00000036766	Dner	A930026D19Rik|BET|Bret	delta/notch-like EGF repeat containing	protein-coding	5.13	1.27
	chr7-29157	chr7	12433779	12434279	+	5.13	500	Intergenic	L1_Mus1|LINE|L1	-11538	NM_001033820	619331	Mm.361832	NM_001033820	ENSMUSG00000034071	Zfp551	9630004E07Rik|Znf551	zinc fingr protein 551	protein-coding	5.13	1.27
	chr1-52155	chr1	194335678	194336178	+	5.13	500	Intergenic	Intergenic	-113169	NR_040477	74942	Mm.60689	NR_040477	ENSMUSG00000103692	4930503O07Rik	-	RIKEN cDNA 4930503O07 gene	ncRNA	5.13	1.27
	chr9-23552	chr9	112075169	112075669	+	5.13	500	intron (NM_001362029, intron 18 of 19)	intron (NM_001362029, intron 18 of 19)	43292	NR_029823	723815		NR_029823	ENSMUSG00000065441	Mir128-2	Mirn128-2|Mirn128b|mir-128-2|mir-128b	microRNA 128-2	ncRNA	5.13	0.91
	chr9-23328	chr9	91228783	91229283	+	5.13	500	Intergenic	Intergenic	136766	NM_009573	22771	Mm.335350	NM_009573	ENSMUSG00000032368	Zic1	ZIC|ZNF201	zinc finger protein of the cerebellum 1	protein-coding	5.13	1.09
	chr17-40518	chr17	82846234	82846734	+	5.13	500	Intergenic	Lx7|LINE|L1	231741	NR_045094	100503434	Mm.187281	NR_045094	ENSMUSG00000117399	Gm19689	-	predicted gene, 19689	ncRNA	5.13	1.09
	chr16-18717	chr16	77960670	77961170	+	5.13	500	Intergenic	Intergenic	294534	NR_045698	100503619	Mm.387531	NR_045698	ENSMUSG00000109841	E330011O21Rik	-	RIKEN cDNA E330011O21 gene	ncRNA	5.13	1.09
	chr1-46377	chr1	87130971	87131471	+	5.13	500	Intergenic	B4A|SINE|B4	6267	NM_007432	11648	Mm.377076	NM_007432	ENSMUSG00000036500	Akp3	Akp-3|IAP|dIAP	alkaline phosphatase 3, intestine, not Mn requiring	protein-coding	5.13	1.27
	chr15-55646	chr15	66396085	66396585	+	5.13	500	intron (NM_019457, intron 11 of 11)	intron (NM_019457, intron 11 of 11)	104575	NM_019457	54562	Mm.244890	NM_019457	ENSMUSG00000022375	Lrrc6	LRTP	leucine rich repeat containing 6 (testis)	protein-coding	5.13	0.91
	chr1-48316	chr1	6671209	6671709	+	5.13	500	intron (NM_001244693, intron 2 of 22)	L1VL2|LINE|L1	-58592	NM_173868	240690	Mm.234612	NM_173868	ENSMUSG00000033740	St18	AV348974|Myt3|NZF-3|Nzf3|mKIAA0535	suppression of tumorigenicity 18	protein-coding	5.13	1.27
	chr3-38963	chr3	14939088	14939588	+	5.13	500	Intergenic	MT2C_Mm|LTR|ERVL	-31863	NR_040550	77127	Mm.195792	NR_040549	ENSMUSG00000098008	A930001A20Rik	-	RIKEN cDNA A930001A20 gene	ncRNA	5.13	1.27
	chr6-36879	chr6	126034843	126035343	+	5.13	500	intron (NM_001364563, intron 22 of 23)	intron (NM_001364563, intron 22 of 23)	129867	NM_001164035	18205	Mm.267570	NM_008742	ENSMUSG00000049107	Ntf3	AI316846|AI835689|HDNF|NGF-2|Nt3|Ntf-3	neurotrophin 3	protein-coding	5.13	1.09
	chr3-40170	chr3	77963370	77963870	+	5.13	500	Intergenic	Lx9|LINE|L1	1182126	NM_001310536	76089	Mm.31220	NM_001099624	ENSMUSG00000062232	Rapgef2	5830453M24Rik|CNRasGEF|Pdzgef1|RA-GEF-1|mKIAA0313|nRapGEP	Rap guanine nucleotide exchange factor (GEF) 2	protein-coding	5.13	1.27
	chr13-21198	chr13	17217022	17217522	+	5.13	500	intron (NM_138654, intron 12 of 13)	intron (NM_138654, intron 12 of 13)	477493	NM_138654	192136	Mm.364180	NM_138654	ENSMUSG00000055137	Sugct	5033411D12Rik|D17907	succinyl-CoA glutarate-CoA transferase	protein-coding	5.13	0.91
	chr9-20164	chr9	52736350	52736850	+	5.13	500	intron (NR_045333, intron 2 of 4)	intron (NR_045333, intron 2 of 4)	56737	NR_045333	382139	Mm.335162	NR_045333	ENSMUSG00000111020	Gm1715	-	predicted gene 1715	ncRNA	5.13	1.09
	chr12-22733	chr12	112182891	112183391	+	5.13	500	Intergenic	Intergenic	36933	NM_001097621	668303	Mm.313104	NM_001097621	ENSMUSG00000021294	Kif26a	mKIAA1236	kinesin family member 26A	protein-coding	5.13	1.27
	chr16-16912	chr16	26513110	26513610	+	5.13	500	intron (NM_001101640, intron 4 of 4)	intron (NM_001101640, intron 4 of 4)	13411	NM_001101640	100043057	Mm.295917	NM_001101640	ENSMUSG00000091972	Tmem207	Gm540	transmembrane protein 207	protein-coding	5.13	1.27
	chr3-43943	chr3	82582501	82583001	+	5.13	500	Intergenic	MLT1K|LTR|ERVL-MaLR	-34666	NM_008731	18167	Mm.1433	NM_008731	ENSMUSG00000028004	Npy2r	NPY2-R	neuropeptide Y receptor Y2	protein-coding	5.13	1.27
	chr13-23654	chr13	85502797	85503297	+	5.13	500	Intergenic	Intergenic	-213561	NM_145452	218397	Mm.259653	NM_145452	ENSMUSG00000021549	Rasa1	Gap|RasGAP|Rasa	RAS p21 protein activator 1	protein-coding	5.13	1.27
	chr18-11411	chr18	5451738	5452238	+	5.13	500	Intergenic	Intergenic	-117181	NM_001360447	240186	Mm.118257	NM_178722	ENSMUSG00000050945	Zfp438	9430031G09|9430091M14Rik|B830013J05Rik	zinc finger protein 438	protein-coding	5.13	1.27
	chr2-42289	chr2	42326244	42326744	+	5.13	500	intron (NM_053011, intron 1 of 90)	intron (NM_053011, intron 1 of 90)	121074	NR_105754	102465171		NR_105754	ENSMUSG00000098660	Mir6336	Gm27584|mmu-mir-6336	microRNA 6336	ncRNA	5.13	1.27
	chr11-36858	chr11	94709542	94710042	+	5.13	500	Intergenic	B2_Mm2|SINE|B2	-5293	NM_001007584	432589	Mm.342314	NM_001007584	ENSMUSG00000056008	Gm11541	-	predicted gene 11541	protein-coding	5.13	1.09
	chr14-15487	chr14	123275726	123276226	+	5.13	500	TTS (NM_177393)	TTS (NM_177393)	106790	NR_045144	380934	Mm.393838	NR_045143	ENSMUSG00000115016	AA536875	Gm1591	expressed sequence AA536875	ncRNA	5.13	1.09
	chr5-35063	chr5	117363241	117363741	+	5.13	500	intron (NM_021539, intron 1 of 8)	intron (NM_021539, intron 1 of 8)	6186	NM_021539	59043	Mm.28489	NM_021539	ENSMUSG00000029364	Wsb2	AA673511|Swip2|WSB-2	WD repeat and SOCS box-containing 2	protein-coding	5.13	1.09
	chr5-37278	chr5	91816399	91816899	+	5.13	500	Intergenic	Intergenic	-49349	NR_045383	73452	Mm.396233	NR_045383	ENSMUSG00000101978	1700063O14Rik	-	RIKEN cDNA 1700063O14 gene	ncRNA	5.13	1.09
	chr6-31537	chr6	125542602	125543102	+	5.13	500	Intergenic	Intergenic	-10096	NM_011708	22371	Mm.22339	NM_011708	ENSMUSG00000001930	Vwf	6820430P06Rik|AI551257|B130011O06Rik|C630030D09|F8VWF|VWD	Von Willebrand factor	protein-coding	5.13	1.09
	chr16-17385	chr16	76901011	76901511	+	5.13	500	Intergenic	Intergenic	109620	NR_040573	76601	Mm.396217	NR_040573	ENSMUSG00000100857	1700041M19Rik	-	RIKEN cDNA 1700041M19 gene	ncRNA	5.13	1.09
	chr17-37117	chr17	84882219	84882719	+	5.13	500	Intergenic	ORR1B1|LTR|ERVL-MaLR	-74272	NM_001159497	19043	Mm.249695	NM_011151	ENSMUSG00000061130	Ppm1b	PP2CB	protein phosphatase 1B, magnesium dependent, beta isoform	protein-coding	5.13	1.27
	chr12-17689	chr12	57121181	57121681	+	5.13	500	intron (NM_172577, intron 1 of 9)	intron (NM_172577, intron 1 of 9)	39212	NM_001167976	217593	Mm.32835	NM_172577	ENSMUSG00000035472	Slc25a21	9930033G19Rik|A630030I10|BB158148	solute carrier family 25 (mitochondrial oxodicarboxylate carrier), member 21	protein-coding	5.13	1.27
	chr18-10626	chr18	68444271	68444771	+	5.13	500	Intergenic	Intergenic	-15201	NM_001301372	17200	Mm.426053	NM_008560	ENSMUSG00000045569	Mc2r	ACTH-R|ACTHR|MC2-R	melanocortin 2 receptor	protein-coding	5.13	0.91
	chr3-36676	chr3	59161681	59162181	+	5.13	500	intron (NM_177855, intron 15 of 43)	intron (NM_177855, intron 15 of 43)	-8303	NR_045641	320463	Mm.484506	NR_045641	ENSMUSG00000036381	F630111L10Rik	-	RIKEN cDNA F630111L10 gene	ncRNA	5.13	1.27
	chr12-20734	chr12	96763262	96763762	+	5.13	500	Intergenic	Intergenic	-716290	NR_103800	69423	Mm.46121	NM_027076		1700019M22Rik	-	NFX-like protein	pseudo	5.13	0.91
	chr3-34009	chr3	57010963	57011463	+	5.13	500	Intergenic	Intergenic	290775	NM_001355130	17112	Mm.856	NM_008536	ENSMUSG00000027800	Tm4sf1	L6|M3s1	transmembrane 4 superfamily member 1	protein-coding	5.13	1.27
	chr7-34446	chr7	102665935	102666435	+	5.13	500	Intergenic	L1_Mus2|LINE|L1	-3716	NM_146754	258749	Mm.377671	NM_146754	ENSMUSG00000073969	Olfr556	MOR41-1	olfactory receptor 556	protein-coding	5.13	1.09
	chr18-11480	chr18	10503176	10503676	+	5.13	500	intron (NM_001083628, intron 11 of 32)	intron (NM_001083628, intron 11 of 32)	106926	NM_001081222	77805	Mm.210996	NM_144542	ENSMUSG00000024293	Esco1	A930014I12Rik	establishment of sister chromatid cohesion N-acetyltransferase 1	protein-coding	5.13	1.27
	chr6-39129	chr6	54974051	54974551	+	5.13	500	Intergenic	(TCTCCC)n|Simple_repeat|Simple_repeat	-1689	NM_172729	107607	Mm.28498	NM_172729	ENSMUSG00000038058	Nod1	C230079P11|Card4|F830007N14Rik|Nlrc1	nucleotide-binding oligomerization domain containing 1	protein-coding	5.13	1.09
	chr18-11658	chr18	35663163	35663663	+	5.13	500	Intergenic	CT-rich|Low_complexity|Low_complexity	-1227	NM_027733	71242	Mm.151498	NM_027733	ENSMUSG00000024352	Spata24	2700012K08Rik|4930583E11Rik|5133400G04Rik|AU016220|TIPT|TIPT2	spermatogenesis associated 24	protein-coding	5.13	1.09
	chr9-22122	chr9	114094661	114095161	+	5.13	500	intron (NM_001101510, intron 4 of 4)	intron (NM_001101510, intron 4 of 4)	37557	NM_001101510	382111	Mm.376140	NM_001101510	ENSMUSG00000086596	Susd5	Gm1126	sushi domain containing 5	protein-coding	5.13	0.91
	chr3-39804	chr3	58609850	58610350	+	5.13	500	Intergenic	MIR3|SINE|MIR	27107	NM_001081262	545527	Mm.357722	NM_001081262	ENSMUSG00000070471	Erich6	4932431H17Rik|Fam194a	glutamate rich 6	protein-coding	5.13	1.27
	chr1-46380	chr1	87203799	87204299	+	5.13	500	Intergenic	Intergenic	-1762	NM_009604	11449	Mm.2810	NM_009604	ENSMUSG00000026253	Chrng	Achr-3|Acrg	cholinergic receptor, nicotinic, gamma polypeptide	protein-coding	5.13	1.27
	chr3-42714	chr3	25084869	25085369	+	5.13	500	Intergenic	L1_Mur3|LINE|L1	-301113	NM_001326288	635702	Mm.448351	NM_001326288	ENSMUSG00000102758	Naaladl2	2810043G22Rik|EG635702|Gm1021	N-acetylated alpha-linked acidic dipeptidase-like 2	protein-coding	5.13	0.73
	chr3-46086	chr3	154758751	154759251	+	5.13	500	Intergenic	Intergenic	47868	NM_175176	209601	Mm.331454	NM_175176	ENSMUSG00000078161	Erich3	1700013E18Rik|4922501L14Rik|5031409G23Rik|AI596448|Gm133	glutamate rich 3	protein-coding	5.13	1.27
	chr10-42516	chr10	106029379	106029879	+	5.13	500	Intergenic	Intergenic	188150	NM_025602	52713	Mm.339224	NM_025602	ENSMUSG00000019897	Ccdc59	2300004H16Rik|D10Ertd718e	coiled-coil domain containing 59	protein-coding	5.13	1.27
	chr5-40014	chr5	69804815	69805315	+	5.13	500	Intergenic	Lx5c|LINE|L1	-212761	NM_001347363	67980	Mm.33830	NM_027681	ENSMUSG00000029209	Gnpda2	4921523I18Rik|4933412A11Rik|BB189630|GNPDA|Gnp2|Sb52|mKIAA4008	glucosamine-6-phosphate deaminase 2	protein-coding	5.13	1.27
	chr7-34231	chr7	87489320	87489820	+	5.13	500	intron (NM_011661, intron 1 of 4)	intron (NM_011661, intron 1 of 4)	3942	NM_001317397	22173	Mm.238127	NM_011661	ENSMUSG00000004651	Tyr	Oca1|albino|c|skc35	tyrosinase	protein-coding	5.13	1.27
	chr6-38170	chr6	19450041	19450541	+	5.13	500	Intergenic	RLTR26_Mus|LTR|ERVK	-105051	NR_105789	102465192		NR_105789	ENSMUSG00000099149	Mir6370	Gm27480|mmu-mir-6370	microRNA 6370	ncRNA	5.13	1.27
	chr2-35679	chr2	74478366	74478866	+	5.13	500	Intergenic	Intergenic	100332	NM_001110209	69605	Mm.156113	NM_027133	ENSMUSG00000009207	Lnpk	2310011O18Rik|4921514L11Rik|9530051D01Rik|AI666268|Lnp|Lnpk1|Ul|ulnaless	lunapark, ER junction formation factor	protein-coding	5.13	1.27
	chr14-14853	chr14	34106792	34107292	+	5.13	500	Intergenic	RMER1A|Other|Other	-4288	NM_001251843	105518	Mm.246608	NM_001251843	ENSMUSG00000095493	A630023A22Rik	AI461879	RIKEN cDNA A630023A22 gene	protein-coding	5.13	1.27
	chr1-45588	chr1	52587274	52587774	+	5.13	500	Intergenic	Intergenic	-7232	NR_151614	102634661	Mm.337881	NR_151614	ENSMUSG00000099878	Gm28178	-	predicted gene 28178	ncRNA	5.13	1.27
	chr8-17028	chr8	56691504	56692004	+	5.13	500	Intergenic	Intergenic	140600	NM_001368348	50753	Mm.251174	NM_015791	ENSMUSG00000038206	Fbxo8	Fbx8	F-box protein 8	protein-coding	5.13	1.27
	chr5-36687	chr5	51919735	51920235	+	5.13	500	Intergenic	Intergenic	216032	NR_105845	102466648		NR_105845	ENSMUSG00000098726	Mir6417	Gm27334|mmu-mir-6417	microRNA 6417	ncRNA	5.13	1.27
	chr14-13766	chr14	14864672	14865172	+	5.13	500	intron (NM_001195229, intron 19 of 34)	intron (NM_001195229, intron 19 of 34)	44107	NM_001195229	674895	Mm.317563	NM_001034865	ENSMUSG00000042567	Nek10	Gm282	NIMA (never in mitosis gene a)- related kinase 10	protein-coding	5.13	1.27
	chr5-32332	chr5	99135130	99135630	+	5.13	500	Intergenic	B3|SINE|B2	-98301	NM_008926	19092	Mm.263002	NM_008926	ENSMUSG00000029334	Prkg2	AW212535|CGKII|Prkgr2|cGK-II	protein kinase, cGMP-dependent, type II	protein-coding	5.13	1.27
	chr7-32882	chr7	24664265	24664765	+	5.13	500	Intergenic	Lx2B2|LINE|L1	3221	NR_030681	100043706	Mm.483825	NR_030681	ENSMUSG00000108470	Gm4598	-	predicted gene 4598	ncRNA	5.13	1.27
	chr10-36427	chr10	9625496	9625996	+	5.13	500	Intergenic	Intergenic	49462	NM_177271	320825	Mm.101115	NM_177271	ENSMUSG00000060487	Samd5	E130306M17Rik	sterile alpha motif domain containing 5	protein-coding	5.13	1.09
	chr11-35693	chr11	31416154	31416654	+	5.13	500	Intergenic	Intergenic	-46343	NM_011491	20856	Mm.32506	NM_011491	ENSMUSG00000020303	Stc2	AW125853|Stc-2|Stc2l|mustc2	stanniocalcin 2	protein-coding	5.13	1.27
	chr10-38380	chr10	85661789	85662289	+	5.13	500	Intergenic	ORR1E|LTR|ERVL-MaLR	63628	NM_001017525	74007	Mm.36544	NM_028709	ENSMUSG00000020042	Btbd11	6330404E16Rik	BTB (POZ) domain containing 11	protein-coding	5.13	0.91
	chr8-17864	chr8	44910451	44910951	+	5.13	500	Intergenic	Intergenic	-39507	NM_001081286	14107	Mm.27365	NM_001081286	ENSMUSG00000070047	Fat1	2310038E12Rik|AU023433|Fath|mFat1	FAT atypical cadherin 1	protein-coding	5.13	1.09
	chr15-51853	chr15	97211986	97212486	+	5.13	500	Intergenic	Intergenic	-34871	NM_172293	239647	Mm.130036	NM_172293	ENSMUSG00000044250	Pced1b	Fam113b	PC-esterase domain containing 1B	protein-coding	5.13	1.09
	chr7-36896	chr7	97452108	97452608	+	5.13	500	promoter-TSS (NM_001012434)	promoter-TSS (NM_001012434)	-846	NM_001010826	233529	Mm.334033	NM_001010826	ENSMUSG00000051727	Kctd14	AI449310|D7Ertd760e	potassium channel tetramerisation domain containing 14	protein-coding	5.13	1.09
	chr14-15429	chr14	113226716	113227216	+	5.13	500	Intergenic	Intergenic	1551851	NM_198865	75409	Mm.235097	NM_029273	ENSMUSG00000033214	Slitrk5	2610019D03Rik	SLIT and NTRK-like family, member 5	protein-coding	5.13	1.09
	chr17-35733	chr17	47406379	47406879	+	5.13	500	Intergenic	ORR1A2-int|LTR|ERVL-MaLR	-6023	NM_008189	14913	Mm.16224	NM_008189	ENSMUSG00000023982	Guca1a	GC-A|Gcap1|Guca1|mGCAP1	guanylate cyclase activator 1a (retina)	protein-coding	5.13	1.27
	chr9-22042	chr9	104554945	104555445	+	5.13	500	Intergenic	Intergenic	-11481	NM_001357439	74020	Mm.326240	NM_028719	ENSMUSG00000032564	Cpne4	3632411M23Rik|4933406O10Rik	copine IV	protein-coding	5.13	1.09
	chr1-45034	chr1	13064878	13065378	+	5.13	500	Intergenic	B2_Mm2|SINE|B2	62035	NM_001081209	383491	Mm.309380	NM_001081209	ENSMUSG00000042414	Prdm14	-	PR domain containing 14	protein-coding	5.13	1.27
	chr10-32756	chr10	92092979	92093479	+	5.13	500	intron (NR_028262, intron 11 of 12)	intron (NR_028262, intron 11 of 12)	-21044	NR_029812	723955		NR_029812	ENSMUSG00000065524	Mir135a-2	Mirn135a-2|mir-135a-2	microRNA 135a-2	ncRNA	5.13	1.09
	chr4-46379	chr4	104926380	104926880	+	5.13	500	intron (NM_001285953, intron 1 of 19)	MLT1J2|LTR|ERVL-MaLR	13069	NM_001162980	242594	Mm.65181	NM_001162980	ENSMUSG00000078612	Fyb2	1700024P16Rik|ARAP|C1orf168|Gm620	FYN binding protein 2	protein-coding	5.13	0.73
	chr9-19701	chr9	123927817	123928317	+	5.13	500	Intergenic	MLT1F|LTR|ERVL-MaLR	40625	NM_009912	12768	Mm.274927	NM_009912	ENSMUSG00000025804	Ccr1	Cmkbr1|Mip-1a-R	chemokine (C-C motif) receptor 1	protein-coding	5.13	1.27
	chr6-40293	chr6	128659849	128660349	+	5.13	500	Intergenic	Lx2B|LINE|L1	-2286	NM_053165	94071	Mm.197689	NM_053165	ENSMUSG00000030364	Clec2h	Clrf|clr-f	C-type lectin domain family 2, member h	protein-coding	5.13	1.27
	chr16-16071	chr16	42607306	42607806	+	5.13	500	Intergenic	Intergenic	-266905	NM_008083	14432	Mm.1222	NM_008083	ENSMUSG00000047261	Gap43	B-50|Basp2|GAP-43	growth associated protein 43	protein-coding	5.13	1.09
	chr2-49266	chr2	74265888	74266388	+	5.13	500	Intergenic	Intergenic	41579	NR_040501	73962	Mm.50289	NR_040501	ENSMUSG00000085405	4930441J16Rik	Astx1a|Astx1b|Astx1c	RIKEN cDNA 4930441J16 gene	ncRNA	5.13	1.27
	chr17-39779	chr17	65396489	65396989	+	5.13	500	intron (NM_001008973, intron 12 of 14)	intron (NM_001008973, intron 12 of 14)	113318	NM_001360185	381107	Mm.141275	NM_001008973	ENSMUSG00000045036	Tmem232	E130009J12Rik|Gm940|Tes13-L|Tes13-S	transmembrane protein 232	protein-coding	5.13	1.27
	chr17-35314	chr17	32033618	32034118	+	5.13	500	intron (NM_028902, intron 1 of 7)	PB1|SINE|Alu	640	NM_028902	74377	Mm.75856	NM_028902	ENSMUSG00000002076	Hsf2bp	4932437G14Rik|Meilb2	heat shock transcription factor 2 binding protein	protein-coding	5.13	1.27
	chr19-18081	chr19	59113074	59113574	+	5.13	500	Intergenic	Intergenic	-37255	NM_001114312	71653	Mm.37338	NM_175172	ENSMUSG00000041362	Shtn1	4930506M07Rik|Shootin1|mKIAA1598	shootin 1	protein-coding	5.13	1.27
	chr6-39250	chr6	65008811	65009311	+	5.13	500	Intergenic	Tigger1|DNA|TcMar-Tigger	-33530	NM_001355249	13990	Mm.99113	NM_007958	ENSMUSG00000029920	Smarcad1	AV081750|AW226546|D6Pas1|Etl1|etl-1|mKIAA1122	SWI/SNF-related, matrix-associated actin-dependent regulator of chromatin, subfamily a, containing DEAD/H box 1	protein-coding	5.13	1.27
	chr1-48287	chr1	5260485	5260985	+	5.13	500	Intergenic	Intergenic	177649	NM_133826	108664	Mm.27082	NM_133826	ENSMUSG00000033793	Atp6v1h	0710001F19Rik|AU022349|CGI-11|SFD|SFDalpha|SFDbeta|VMA13	ATPase, H+ transporting, lysosomal V1 subunit H	protein-coding	5.13	1.27
	chr2-42408	chr2	46192418	46192918	+	5.13	500	Intergenic	Intergenic	496063	NR_040497	69405	Mm.396184	NR_040497	ENSMUSG00000086202	1700019E08Rik	-	RIKEN cDNA 1700019E08 gene	ncRNA	5.13	1.09
	chr17-39942	chr17	69986432	69986932	+	5.13	500	intron (NM_001347411, intron 1 of 14)	intron (NM_001347411, intron 1 of 14)	17609	NM_001360665	224997	Mm.311840	NM_027712	ENSMUSG00000003279	Dlgap1	4933422O14Rik|9630002F18|AI845682|AI848168|BB075781|D17Bwg0511e|GKAP/SAPAP|GKPA/SAPAP|Gkap|Sapap1|mKIAA4162	DLG associated protein 1	protein-coding	5.13	1.27
	chr4-43797	chr4	52517466	52517966	+	5.13	500	Intergenic	RLTR9B2|LTR|ERVK	78495	NM_008017	14211	Mm.2999	NM_008017	ENSMUSG00000028312	Smc2	5730502P04Rik|AI255214|AW545314|CAP-E|CAPE|Fin16|SMC-2|Smc2l1	structural maintenance of chromosomes 2	protein-coding	5.13	1.09
	chr14-17101	chr14	46601661	46602161	+	4.95	500	TTS (NR_046460)	TTS (NR_046460)	-26060	NR_046459	100873094	Mm.318596	NR_046459	ENSMUSG00000085123	Rubie	Gm15219|Gm1584	RNA upstream of Bmp4 expressed in inner ear	ncRNA	4.95	1.09
	chr8-20913	chr8	121026069	121026569	+	4.95	500	Intergenic	Intergenic	56791	NR_045471	68790	Mm.246916	NR_045471	ENSMUSG00000097336	Fendrr	1110050K14Rik|LL66|linc-Foxf1a|lincFoxf1	Foxf1 adjacent non-coding developmental regulatory RNA	ncRNA	4.95	1.09
	chr3-38767	chr3	6982462	6982962	+	4.95	500	Intergenic	RSINE1|SINE|B4	-362269	NM_027048	69347	Mm.45822	NM_027048	ENSMUSG00000069118	1700008P02Rik	-	RIKEN cDNA 1700008P02 gene	protein-coding	4.95	1.09
	chr9-20677	chr9	100300773	100301273	+	4.95	500	Intergenic	Intergenic	185450	NM_001033543	213208	Mm.242896	NM_001033543	ENSMUSG00000044244	Il20rb	AV228068|Fndc6|Gm186|Il20R2	interleukin 20 receptor beta	protein-coding	4.95	0.91
	chr6-43188	chr6	71722648	71723148	+	4.95	500	intron (NM_178608, intron 1 of 6)	intron (NM_178608, intron 1 of 6)	15217	NM_178608	52250	Mm.146332	NM_178608	ENSMUSG00000052852	Reep1	D6Ertd253e	receptor accessory protein 1	protein-coding	4.95	1.09
	chr9-21722	chr9	74822925	74823425	+	4.95	500	Intergenic	Intergenic	-25262	NR_045284	100503019	Mm.482658	NR_045284	ENSMUSG00000066477	Gm16551	-	predicted gene 16551	ncRNA	4.95	0.73
	chr7-32448	chr7	130000792	130001292	+	4.95	500	Intergenic	Intergenic	38877	NR_046077	100043150	Mm.334264	NR_046077	ENSMUSG00000108504	Gm4265	-	predicted gene 4265	ncRNA	4.95	1.09
	chr11-34839	chr11	93787318	93787818	+	4.95	500	Intergenic	Intergenic	98198	NM_001013375	217109	Mm.379350	NM_001013375	ENSMUSG00000054079	Utp18	6230425C22Rik|6430513M13|Wdr50	UTP18 small subunit processome component	protein-coding	4.95	1.09
	chr12-21263	chr12	12745709	12746209	+	4.95	500	Intergenic	Lx9|LINE|L1	-76042	NR_136889	102637952	Mm.421393	NR_136889		Gm34637	-	predicted gene, 34637	ncRNA	4.95	1.09
	chr5-37130	chr5	84230314	84230814	+	4.95	500	intron (NM_007937, intron 3 of 15)	intron (NM_007937, intron 3 of 15)	186818	NM_007937	13839	Mm.137991	NM_007937	ENSMUSG00000029245	Epha5	AI854630|AW125296|Cek7|Ehk1|Els1|Hek7|Rek7|bsk	Eph receptor A5	protein-coding	4.95	1.09
	chr15-59765	chr15	46710282	46710782	+	4.95	500	Intergenic	IAPEz-int|LTR|ERVK	87227	NR_045811	75281	Mm.159487	NR_045811	ENSMUSG00000051198	4930548G14Rik	-	RIKEN cDNA 4930548G14 gene	ncRNA	4.95	1.09
	chr1-52411	chr1	13773458	13773958	+	4.95	500	Intergenic	Intergenic	13221	NR_004447	433273	Mm.304088	NR_004447	ENSMUSG00000097711	Gm5523	EG433273	glyceraldehyde-3-phosphate dehydrogenase pseudogene	pseudo	4.95	0.55
	chr13-21500	chr13	34545166	34545666	+	4.95	500	Intergenic	Intergenic	107265	NM_025831	66895	Mm.28943	NM_025831	ENSMUSG00000021411	Pxdc1	1300014I06Rik	PX domain containing 1	protein-coding	4.95	0.73
	chr10-43081	chr10	125314207	125314707	+	4.95	500	intron (NM_001358496, intron 1 of 5)	intron (NM_001358496, intron 1 of 5)	-5641	NM_001358915	20503	Mm.29161	NM_011391	ENSMUSG00000020102	Slc16a7	4921534N07Rik|9030411M13Rik|D630004K10Rik|Mct2	solute carrier family 16 (monocarboxylic acid transporters), member 7	protein-coding	4.95	1.09
	chr4-54228	chr4	81033222	81033722	+	4.95	500	Intergenic	Lx8b|LINE|L1	122786	NM_026821	52829	Mm.273986	NM_026821	ENSMUSG00000048706	Lurap1l	1110029A09Rik|AV077978|AV175137|D4Bwg0951e|WI-13707|bM350F23.1	leucine rich adaptor protein 1-like	protein-coding	4.95	0.91
	chr2-50715	chr2	146518095	146518595	+	4.95	500	Intergenic	PB1D10|SINE|Alu	-6341	NM_001033348	241694	Mm.222310	NM_001033348	ENSMUSG00000037110	Ralgapa2	A230067G21Rik|AS250|BC053994|RGC2|pp250	Ral GTPase activating protein, alpha subunit 2 (catalytic)	protein-coding	4.95	0.91
	chr2-49576	chr2	93553624	93554124	+	4.95	500	Intergenic	Intergenic	-88560	NM_007442	11695	Mm.389389	NM_007442	ENSMUSG00000040310	Alx4	lst	aristaless-like homeobox 4	protein-coding	4.95	1.09
	chr12-18690	chr12	38206817	38207317	+	4.95	500	intron (NM_178681, intron 16 of 24)	L1_Mus3|LINE|L1	326550	NM_001361686	217480	Mm.126525	NM_178681	ENSMUSG00000036095	Dgkb	6430574F24|90kda|C630029D13Rik|DAGK2|DGK|DGK-beta|mKIAA0718	diacylglycerol kinase, beta	protein-coding	4.95	0.73
	chr16-19229	chr16	15151766	15152266	+	4.95	500	Intergenic	ORR1E|LTR|ERVL-MaLR	245370	NM_025769	66793	Mm.100270	NM_025769	ENSMUSG00000068617	Efcab1	4930449A16Rik|5430404L10Rik	EF-hand calcium binding domain 1	protein-coding	4.95	1.09
	chr15-58098	chr15	12290150	12290650	+	4.95	500	Intergenic	Lx9|LINE|L1	-31096	NM_025673	66629	Mm.157655	NM_025673	ENSMUSG00000022200	Golph3	4733401N08Rik|5730410D03Rik|AW413496	golgi phosphoprotein 3	protein-coding	4.95	0.91
	chr11-36167	chr11	65414220	65414720	+	4.95	500	Intergenic	Intergenic	-126637	NR_040280	327946	Mm.383301	NR_040280	ENSMUSG00000085162	Gm12295	A730013G04	predicted gene 12295	ncRNA	4.95	1.09
	chr16-16505	chr16	7150191	7150691	+	4.95	500	intron (NM_183188, intron 1 of 12)	intron (NM_183188, intron 1 of 12)	80606	NM_183188	268859	Mm.370334	NM_021477	ENSMUSG00000008658	Rbfox1	A2bp|A2bp1|Hrnbp1|fox-1	RNA binding protein, fox-1 homolog (C. elegans) 1	protein-coding	4.95	1.09
	chr5-37886	chr5	120340518	120341018	+	4.95	500	Intergenic	Intergenic	-91118	NM_008499	16873	Mm.5151	NM_008499	ENSMUSG00000029595	Lhx5	Lim2	LIM homeobox protein 5	protein-coding	4.95	0.91
	chr1-55829	chr1	165801389	165801889	+	4.95	500	intron (NR_103716, intron 1 of 8)	intron (NR_103716, intron 1 of 8)	12958	NM_001113393	12503	Mm.217308	NM_031162	ENSMUSG00000005763	Cd247	4930549J05Rik|A430104F18Rik|AW552088|Cd3|Cd3-eta|Cd3-zeta|Cd3h|Cd3z|Cd3zeta|T3z|Tcrk|Tcrz	CD247 antigen	protein-coding	4.95	1.09
	chr19-20962	chr19	56361396	56361896	+	4.95	500	intron (NM_198059, intron 18 of 40)	intron (NM_198059, intron 18 of 40)	28392	NM_001286552	18175	Mm.386769	NM_008733	ENSMUSG00000049134	Nrap	-	nebulin-related anchoring protein	protein-coding	4.95	0.73
	chr3-42118	chr3	153451177	153451677	+	4.95	500	intron (NM_011372, intron 2 of 4)	intron (NM_011372, intron 2 of 4)	-152778	NR_126464	75489	Mm.443252	NR_126464	ENSMUSG00000105023	1700012D16Rik	-	RIKEN cDNA 1700012D16 gene	ncRNA	4.95	0.91
	chr4-49267	chr4	80092578	80093078	+	4.95	500	Intergenic	L1_Mur3|LINE|L1	-741385	NM_001282015	22178	Mm.30438	NM_031202	ENSMUSG00000005994	Tyrp1	Oca3|TRP-1|TRP1|Tyrp|b|brown|isa	tyrosinase-related protein 1	protein-coding	4.95	0.91
	chr18-12386	chr18	38355617	38356117	+	4.95	500	Intergenic	RLTR26_Mus|LTR|ERVK	-16874	NM_011937	26384	Mm.22374	NM_011937	ENSMUSG00000052102	Gnpda1	GNPDA|Gnp1|Gnpi|oscillin	glucosamine-6-phosphate deaminase 1	protein-coding	4.95	0.73
	chr11-36535	chr11	81931190	81931690	+	4.95	500	intron (NM_001034013, intron 1 of 9)	intron (NM_001034013, intron 1 of 9)	36956	NM_001034013	11418	Mm.234998	NM_007384	ENSMUSG00000020704	Asic2	ACIC2|Accn1|BNC1|BNaC1|BNaC1a|Mdeg	acid-sensing (proton-gated) ion channel 2	protein-coding	4.95	1.09
	chr18-12072	chr18	84802153	84802653	+	4.95	500	intron (NM_001370919, intron 11 of 12)	intron (NM_001370919, intron 11 of 12)	36238	NM_001370919	100503964		NM_001370919	ENSMUSG00000117781	Gm17266	-	predicted gene, 17266	protein-coding	4.95	1.09
	chr8-19832	chr8	15423117	15423617	+	4.95	500	Intergenic	Intergenic	365714	NM_008664	17930	Mm.272115	NM_008664	ENSMUSG00000031461	Myom2	AW146149	myomesin 2	protein-coding	4.95	1.09
	chr16-19940	chr16	39543285	39543785	+	4.95	500	Intergenic	Intergenic	-354585	NR_153800	102640746		NR_153800	ENSMUSG00000116965	Gm36742	-	predicted gene, 36742	ncRNA	4.95	0.91
	chr12-20772	chr12	100062421	100062921	+	4.95	500	TTS (NM_146037)	TTS (NM_146037)	-49660	NM_008947	19179	Mm.157105	NM_008947	ENSMUSG00000021178	Psmc1	AI325227|P26s4|Rpt2/S4|S4|rpt2	protease (prosome, macropain) 26S subunit, ATPase 1	protein-coding	4.95	0.73
	chr7-35243	chr7	25952612	25953112	+	4.95	500	Intergenic	Lx5|LINE|L1	55204	NM_009999	13088	Mm.218749	NM_009999	ENSMUSG00000030483	Cyp2b10	Cyp2b|Cyp2b20|p16	cytochrome P450, family 2, subfamily b, polypeptide 10	protein-coding	4.95	1.09
	chr10-34752	chr10	53425662	53426162	+	4.95	500	Intergenic	ID_B1|SINE|B4	16030	NR_152767	102640074	Mm.412957	NR_152767		Gm36229	-	predicted gene, 36229	ncRNA	4.95	1.09
	chr6-43262	chr6	79194842	79195342	+	4.95	500	Intergenic	L1Md_F|LINE|L1	163050	NR_040301	100504701	Mm.400420	NR_040301	ENSMUSG00000108072	Gm20362	-	predicted gene, 20362	ncRNA	4.95	1.09
	chr10-44142	chr10	23674851	23675351	+	4.95	500	Intergenic	Intergenic	110350	NR_037680	100529074	Mm.371846	NR_037680	ENSMUSG00000070063	Snora33	ACA33|MBI-42	small nucleolar RNA, H/ACA box 33	snoRNA	4.95	1.09
	chr7-32739	chr7	12403029	12403529	+	4.95	500	Intergenic	RLTR43C|LTR|ERVK	19212	NM_001033820	619331	Mm.361832	NM_001033820	ENSMUSG00000034071	Zfp551	9630004E07Rik|Znf551	zinc fingr protein 551	protein-coding	4.95	0.91
	chr6-40773	chr6	148474111	148474611	+	4.95	500	Intergenic	LTR50|LTR|ERVL	-30009	NM_198967	387314	Mm.137858	NM_198967	ENSMUSG00000030306	Tmtc1	Arg99|BC023818	transmembrane and tetratricopeptide repeat containing 1	protein-coding	4.95	0.91
	chr3-50730	chr3	152994907	152995407	+	4.95	500	Intergenic	Intergenic	-12947	NM_012028	26938	Mm.40915	NM_012028	ENSMUSG00000039037	St6galnac5	AI851940|Siat7e	ST6 (alpha-N-acetyl-neuraminyl-2,3-beta-galactosyl-1,3)-N-acetylgalactosaminide alpha-2,6-sialyltransferase 5	protein-coding	4.95	0.55
	chr3-46567	chr3	18989696	18990196	+	4.95	500	Intergenic	Intergenic	173149	NM_028840	74252	Mm.200383	NM_028840	ENSMUSG00000027599	Armc1	2310016N05Rik|2900046P06Rik|3110009G21Rik|AA409258|AW048872|Arcp|C330014L16Rik	armadillo repeat containing 1	protein-coding	4.95	1.09
	chr16-16862	chr16	25711777	25712277	+	4.95	500	intron (NM_001127260, intron 1 of 12)	L1VL4|LINE|L1	28262	NM_001127259	22061	Mm.20894	NM_011641	ENSMUSG00000022510	Trp63	AI462811|Ket|P51/P63|P63|P73l|Tp63|Trp53rp1	transformation related protein 63	protein-coding	4.95	0.91
	chr5-39246	chr5	33292499	33292999	+	4.95	500	Intergenic	Intergenic	-17745	NM_001310535	13016	Mm.7286	NM_013502	ENSMUSG00000037373	Ctbp1	BARS|CtBP3/BARS|D4S115h|D5H4S115|D5H4S115E	C-terminal binding protein 1	protein-coding	4.95	1.09
	chr5-34689	chr5	97142198	97142698	+	4.95	500	Intergenic	Intergenic	-30852	NM_198422	231474	Mm.332505	NM_198422	ENSMUSG00000055725	Paqr3	6330415A20Rik|AY424292|RKTG	progestin and adipoQ receptor family member III	protein-coding	4.95	0.73
	chr19-18764	chr19	27623787	27624287	+	4.95	500	Intergenic	Lx5|LINE|L1	194000	NR_027987	107372	Mm.17942	NM_175354		C030016D13Rik	AW413347	RIKEN cDNA C030016D13 gene	ncRNA	4.95	1.09
	chr18-13409	chr18	58442074	58442574	+	4.95	500	Intergenic	B4A|SINE|B4	-113916	NM_001081072	225579	Mm.258517	NM_001081072	ENSMUSG00000024600	Slc27a6	4732438L20Rik|FACVL2|FATP6|VLCS-H1	solute carrier family 27 (fatty acid transporter), member 6	protein-coding	4.95	1.09
	chr7-34526	chr7	111276761	111277261	+	4.95	500	Intergenic	Intergenic	-154336	NR_015573	75479	Mm.381620	NR_015573	ENSMUSG00000110424	1700012D14Rik	-	RIKEN cDNA 1700012D14 gene	ncRNA	4.95	1.09
	chr12-22678	chr12	110164871	110165371	+	4.95	500	Intergenic	Intergenic	-7048	NR_045466	67280	Mm.390495	NR_045466	ENSMUSG00000113331	3110009F21Rik	-	RIKEN cDNA 3110009F21 gene	ncRNA	4.95	1.09
	chr2-49761	chr2	107153433	107153933	+	4.95	500	Intergenic	Intergenic	-94032	NM_008045	14308	Mm.249525	NM_008045	ENSMUSG00000027120	Fshb	FSH|FSH-B|FSH-beta|Fshbeta	follicle stimulating hormone beta	protein-coding	4.95	1.09
	chr2-55315	chr2	160301056	160301556	+	4.95	500	Intergenic	L1M4|LINE|L1	26188	NM_001033411	329554	Mm.291144	NM_001033411	ENSMUSG00000074623	Gm826	-	predicted gene 826	protein-coding	4.95	0.91
	chr17-36617	chr17	72164699	72165199	+	4.95	500	intron (NM_007439, intron 4 of 28)	intron (NM_007439, intron 4 of 28)	383002	NM_030179	78785	Mm.196382	NM_030179	ENSMUSG00000024059	Clip4	1700024K14Rik|1700074B05Rik|4833417L20Rik|5830409B12Rik|Rsnl2	CAP-GLY domain containing linker protein family, member 4	protein-coding	4.95	1.09
	chr4-46069	chr4	97574357	97574857	+	4.95	500	intron (NR_015513, intron 1 of 2)	intron (NR_015513, intron 1 of 2)	-7336	NM_001122952	18027	Mm.31274	NM_010905	ENSMUSG00000028565	Nfia	1110047K16Rik|9430022M17Rik|CTF|NF1-A|NF1A	nuclear factor I/A	protein-coding	4.95	1.09
	chr11-37886	chr11	36990804	36991304	+	4.95	500	Intergenic	ORR1E|LTR|ERVL-MaLR	-46813	NM_001290702	23964	Mm.439889	NM_011856	ENSMUSG00000049336	Tenm2	Odz2|Odz3|Ten-2|Ten-m2	teneurin transmembrane protein 2	protein-coding	4.95	1.09
	chr4-50335	chr4	95939586	95940086	+	4.95	500	Intergenic	Intergenic	27199	NR_045777	319247	Mm.473527	NM_175680	ENSMUSG00000044125	9530080O11Rik	-	RIKEN cDNA 9530080O11 gene	ncRNA	4.95	1.09
	chr7-33995	chr7	77758582	77759082	+	4.95	500	Intergenic	Intergenic	819006	NM_182809	18213	Mm.33496	NM_008746	ENSMUSG00000059146	Ntrk3	AW125844|Ntrk3_tv3|TrkC	neurotrophic tyrosine kinase, receptor, type 3	protein-coding	4.95	1.09
	chr3-38950	chr3	11265001	11265501	+	4.95	500	Intergenic	Intergenic	579108	NR_040751	100038545	Mm.388494	NR_040751	ENSMUSG00000104015	Gm10745	-	predicted gene 10745	ncRNA	4.95	1.09
	chr4-52401	chr4	47241283	47241783	+	4.95	500	intron (NM_009928, intron 2 of 39)	intron (NM_009928, intron 2 of 39)	33521	NM_009928	12819	Mm.233547	NM_009928	ENSMUSG00000028339	Col15a1	-	collagen, type XV, alpha 1	protein-coding	4.95	1.09
	chr4-55401	chr4	97609464	97609964	+	4.95	500	intron (NM_001122952, intron 1 of 10)	intron (NM_001122952, intron 1 of 10)	-25123	NR_015513	319865	Mm.373807	NM_177023		E130114P18Rik	-	RIKEN cDNA E130114P18 gene	ncRNA	4.95	0.91
	chr2-53258	chr2	73278064	73278564	+	4.95	500	Intergenic	Intergenic	6388	NM_001005343	381373	Mm.330293	NM_001005343	ENSMUSG00000068859	Sp9	-	trans-acting transcription factor 9	protein-coding	4.95	1.09
	chr12-20460	chr12	76804084	76804584	+	4.95	500	intron (NM_134050, intron 2 of 6)	intron (NM_134050, intron 2 of 6)	-8780	NM_030677	14776	Mm.441856	NM_030677	ENSMUSG00000042808	Gpx2	GI-GPx|GPx-GI|GSHPx-2|GSHPx-GI	glutathione peroxidase 2	protein-coding	4.95	1.09
	chr5-33012	chr5	144501854	144502354	+	4.95	500	Intergenic	Intergenic	-43783	NM_016789	53324	Mm.10099	NM_016789	ENSMUSG00000059991	Nptx2	Narp|np2	neuronal pentraxin 2	protein-coding	4.95	1.09
	chr4-43854	chr4	55178866	55179366	+	4.95	500	Intergenic	Intergenic	-170926	NM_009011	19359	Mm.196846	NM_009011	ENSMUSG00000028426	Rad23b	0610007D13Rik|AV001138|HR23B|mHR23B|p58	RAD23 homolog B, nucleotide excision repair protein	protein-coding	4.95	0.91
	chr19-19083	chr19	41047796	41048296	+	4.95	500	intron (NM_001043228, intron 8 of 10)	B4A|SINE|B4	18771	NM_009345	21673	Mm.25620	NM_009345	ENSMUSG00000025014	Dntt	Tdt	deoxynucleotidyltransferase, terminal	protein-coding	4.95	0.91
	chr1-50149	chr1	90566539	90567039	+	4.95	500	Intergenic	Intergenic	-36636	NM_133805	108679	Mm.119177	NM_133805	ENSMUSG00000034432	Cops8	9430009J09Rik|AA408242|Csn8|Sgn8	COP9 signalosome subunit 8	protein-coding	4.95	0.91
	chr16-18745	chr16	84091847	84092347	+	4.95	500	Intergenic	RLTR12A|LTR|ERVK	-279046	NR_040567	75247	Mm.417813	NR_040567	ENSMUSG00000116907	4930553E22Rik	-	RIKEN cDNA 4930553E22 gene	ncRNA	4.95	0.91
	chrX-6928	chrX	133244430	133244930	+	4.95	500	Intergenic	L1_Mus3|LINE|L1	-443100	NR_153117	102632590	Mm.403836	NR_153117	ENSMUSG00000096978	Gm26851	-	predicted gene, 26851	ncRNA	4.95	1.09
	chr7-35507	chr7	42439928	42440428	+	4.95	500	Intergenic	LTRIS_Mus|LTR|ERV1	7924	NM_027702	71162	Mm.158598	NM_027702	ENSMUSG00000030463	4933421I07Rik	-	RIKEN cDNA 4933421I07 gene	protein-coding	4.95	1.09
	chr9-22523	chr9	27864020	27864520	+	4.95	500	Intergenic	L1M4c|LINE|L1	467058	NM_001305058	75469	Mm.45824	NM_029299	ENSMUSG00000031991	Spata19	1700001L23Rik|AV047838|spergen-1	spermatogenesis associated 19	protein-coding	4.95	1.09
	chr10-43079	chr10	124857402	124857902	+	4.95	500	Intergenic	Intergenic	388578	NR_028310	75030	Mm.159403	NR_028310	ENSMUSG00000112364	4930503E24Rik	-	eukaryotic translation initiation factor 3, subunit I pseudogene	pseudo	4.95	0.91
	chr19-17271	chr19	17123227	17123727	+	4.95	500	exon (NM_181348, exon 8 of 20)	exon (NM_181348, exon 8 of 20)	167359	NM_181348	353211	Mm.257354	NM_181348	ENSMUSG00000039126	Prune2	6330414G02Rik|A230083H22Rik|A330102H22Rik|Bmcc1|mKIAA0367	prune homolog 2	protein-coding	4.95	1.09
	chr7-36595	chr7	82266738	82267238	+	4.95	500	intron (NM_017400, intron 2 of 8)	ORR1C1|LTR|ERVL-MaLR	-68706	NM_001190374	269959	Mm.65306	NM_001190374	ENSMUSG00000070469	Adamtsl3	9230119C12Rik|C130057K09|mKIAA1233	ADAMTS-like 3	protein-coding	4.95	0.91
	chr13-23754	chr13	94896764	94897264	+	4.95	500	Intergenic	Intergenic	21378	NM_011021	18420	Mm.42051	NM_011021	ENSMUSG00000021685	Otp	-	orthopedia homeobox	protein-coding	4.95	1.09
	chr15-61927	chr15	77640020	77640520	+	4.95	500	intron (NM_001143686, intron 2 of 3)	ORR1E|LTR|ERVL-MaLR	3016	NM_001143686	328563	Mm.17957	NM_001143686	ENSMUSG00000091694	Apol11b	A330102K04Rik	apolipoprotein L 11b	protein-coding	4.95	0.91
	chr7-32303	chr7	116576261	116576761	+	4.95	500	Intergenic	RLTR42-int|LTR|ERVK	72142	NM_001130479	53322	Mm.9901	NM_016773	ENSMUSG00000030659	Nucb2	AI607786|Calnuc|Nefa|Nesfatin-1	nucleobindin 2	protein-coding	4.95	1.09
	chr1-52268	chr1	6473011	6473511	+	4.95	500	Intergenic	Intergenic	-13970	NM_001244692	240690	Mm.234612	NM_173868	ENSMUSG00000033740	St18	AV348974|Myt3|NZF-3|Nzf3|mKIAA0535	suppression of tumorigenicity 18	protein-coding	4.95	0.91
	chr2-48878	chr2	57870855	57871355	+	4.95	500	Intergenic	B3A|SINE|B2	-127050	NM_172855	241391	Mm.484118	NM_172855	ENSMUSG00000026828	Galnt5	4832424J23	polypeptide N-acetylgalactosaminyltransferase 5	protein-coding	4.95	0.91
	chr13-22763	chr13	23758046	23758546	+	4.95	500	TTS (NM_178193)	TTS (NM_178193)	1359	NM_178193	326620	Mm.261642	NM_178193	ENSMUSG00000069266	Hist1h4b	-	histone cluster 1, H4b	protein-coding	4.95	1.09
	chr13-24371	chr13	9019166	9019666	+	4.95	500	Intergenic	ID_B1|SINE|B4	-23404	NM_027000	69237	Mm.41800	NM_027000	ENSMUSG00000021149	Gtpbp4	2610028C09Rik|Crfg|Gtpbp3|NGB|Nog1	GTP binding protein 4	protein-coding	4.95	1.09
	chr8-20995	chr8	125359727	125360227	+	4.95	500	Intergenic	RMER6C|LTR|ERVK	132856	NM_001081337	244668	Mm.271668	NM_001081337	ENSMUSG00000001995	Sipa1l2	BC058408|mKIAA1389	signal-induced proliferation-associated 1 like 2	protein-coding	4.95	1.09
	chr10-42762	chr10	112409346	112409846	+	4.95	500	intron (NM_001359753, intron 2 of 4)	Lx2|LINE|L1	138323	NM_001359753	268345	Mm.336242	NM_001025581	ENSMUSG00000035681	Kcnc2	AW047325|B230117I07|KShIIIA|Kv3.2	potassium voltage gated channel, Shaw-related subfamily, member 2	protein-coding	4.95	0.91
	chrX-7316	chrX	152118801	152119301	+	4.95	500	Intergenic	Lx9|LINE|L1	-25217	NM_001114664	245666	Mm.33027	NM_001005475	ENSMUSG00000041115	Iqsec2	Brag1	IQ motif and Sec7 domain 2	protein-coding	4.95	1.09
	chr4-56963	chr4	134017046	134017546	+	4.95	500	intron (NM_145833, intron 2 of 3)	intron (NM_145833, intron 2 of 3)	1520	NM_145833	83557	Mm.302567	NM_145833	ENSMUSG00000050966	Lin28a	AL024421|Gm10299|Lin-28|Lin28|Tex17|lin-28A	lin-28 homolog A (C. elegans)	protein-coding	4.95	0.91
	chr2-48936	chr2	61064161	61064661	+	4.95	500	Intergenic	L1_Mus3|LINE|L1	-89260	NR_045335	100038493	Mm.388076	NR_045335	ENSMUSG00000075325	Gm13582	-	predicted gene 13582	ncRNA	4.95	1.09
	chr2-43295	chr2	108858830	108859330	+	4.95	500	Intergenic	Lx3_Mus|LINE|L1	419210	NM_029790	76894	Mm.330451	NM_029790	ENSMUSG00000057234	Mettl15	0610027B03Rik|AI303697|AW049952|Mett5d1	methyltransferase like 15	protein-coding	4.95	0.91
	chr13-25449	chr13	73465098	73465598	+	4.95	500	Intergenic	LTR16B2|LTR|ERVL	-1883	NM_145376	210992	Mm.284649	NM_145376	ENSMUSG00000021608	Lpcat1	2900035H07Rik|Aytl2|BB137372|BC005662|C87117|LPCAT|LPCAT-1|lysoPAFAT|mLPCAT1|rd11	lysophosphatidylcholine acyltransferase 1	protein-coding	4.95	1.09
	chr19-19965	chr19	19210020	19210520	+	4.95	500	Intergenic	Intergenic	-99074	NM_001043354	225998	Mm.234641	NM_146095	ENSMUSG00000036192	Rorb	Nr1f2|RZR-beta|RZRB|Rorbeta|hstp	RAR-related orphan receptor beta	protein-coding	4.95	1.09
	chr16-18763	chr16	85521099	85521599	+	4.95	500	intron (NM_144853, intron 2 of 3)	intron (NM_144853, intron 2 of 3)	29024	NM_144853	224405	Mm.213203	NM_144853	ENSMUSG00000041134	Cyyr1	-	cysteine and tyrosine-rich protein 1	protein-coding	4.95	0.91
	chr11-39681	chr11	114366759	114367259	+	4.95	500	Intergenic	L1ME3D|LINE|L1	81851	NR_027643	319819	Mm.50754	NM_177008	ENSMUSG00000062391	4932435O22Rik	-	RIKEN cDNA 4932435O22 gene	ncRNA	4.95	1.09
	chr4-46361	chr4	104409486	104409986	+	4.95	500	intron (NM_177259, intron 1 of 14)	Lx3B|LINE|L1	42198	NR_104385	13131	Mm.289682	NM_010014	ENSMUSG00000028519	Dab1	AI956902|C630028C02Rik|scm|scr|scrambler|yot	disabled 1	protein-coding	4.95	1.09
	chr7-36524	chr7	81189455	81189955	+	4.95	500	Intergenic	MTD|LTR|ERVL-MaLR	-23560	NM_008803	18584	Mm.371577	NM_008803	ENSMUSG00000025584	Pde8a	AI551852|Pde8	phosphodiesterase 8A	protein-coding	4.95	1.09
	chr1-49390	chr1	64487110	64487610	+	4.95	500	Intergenic	LTR33A_|LTR|ERVL	-45444	NM_009952	12912	Mm.422634	NM_009952	ENSMUSG00000025958	Creb1	2310001E10Rik|3526402H21Rik|AV083133|Creb|Creb-1	cAMP responsive element binding protein 1	protein-coding	4.95	0.91
	chr9-21636	chr9	65535706	65536206	+	4.95	500	Intergenic	B1_Mus2|SINE|Alu	-15737	NM_001370871	330963	Mm.379561	NM_001370871	ENSMUSG00000066510	Ankdd1a	A730067D02|A730067D02Rik|EG330963|Gm1473	ankyrin repeat and death domain containing 1A	protein-coding	4.95	1.09
	chr4-51724	chr4	132571162	132571662	+	4.95	500	intron (NM_001081211, intron 1 of 1)	intron (NM_001081211, intron 1 of 1)	7345	NM_001081211	19204	Mm.89389	NM_001081211	ENSMUSG00000056529	Ptafr	PAFR	platelet-activating factor receptor	protein-coding	4.95	1.09
	chr8-19402	chr8	103227874	103228374	+	4.95	500	Intergenic	B3|SINE|B2	119410	NR_036588	69794	Mm.396139	NR_036588	ENSMUSG00000110340	1600027J07Rik	-	RIKEN cDNA 1600027J07 gene	ncRNA	4.95	0.91
	chr11-38213	chr11	56369714	56370214	+	4.95	500	Intergenic	L1MDa|LINE|L1	-328977	NM_153079	216749	Mm.213205	NM_153079	ENSMUSG00000037393	Nmur2	Nmu2r	neuromedin U receptor 2	protein-coding	4.95	1.09
	chr14-14592	chr14	8900775	8901275	+	4.95	500	Intergenic	Intergenic	234635	NR_045968	74859	Mm.84041	NR_045968	ENSMUSG00000097898	4930455B14Rik	1700027C12Rik	RIKEN cDNA 4930455B14 gene	ncRNA	4.95	0.73
	chr8-21018	chr8	126383125	126383625	+	4.95	500	intron (NM_175434, intron 3 of 6)	intron (NM_175434, intron 3 of 6)	-39126	NM_174987	67892	Mm.31946	NM_174987	ENSMUSG00000051671	Coa6	1810063B05Rik|AI447995	cytochrome c oxidase assembly factor 6	protein-coding	4.95	1.09
	chr1-54289	chr1	88568483	88568983	+	4.77	500	Intergenic	Intergenic	17216	NR_037971	100503197	Mm.99352	NR_037971	ENSMUSG00000100798	Gm19589	-	predicted gene, 19589	ncRNA	4.77	1.09
	chr2-54869	chr2	142961410	142961910	+	4.77	500	Intergenic	Intergenic	58695	NR_131921	75053	Mm.72638	NR_131921	ENSMUSG00000086504	Kif16bos	4930511F01Rik	kinesin family member 16B, opposite strand	ncRNA	4.77	0.91
	chr2-51612	chr2	12073063	12073563	+	4.77	500	Intergenic	Lx|LINE|L1	-227933	NR_040353	338535	Mm.483275	NR_040353	ENSMUSG00000086843	E030013I19Rik	-	RIKEN cDNA E030013I19 gene	ncRNA	4.77	0.91
	chr16-20027	chr16	46184077	46184577	+	4.77	500	Intergenic	B3A|SINE|B2	-29250	NM_001304528	11615	Mm.330692	NM_001304528	ENSMUSG00000048087	Gm4737	AL024110|EG11615	predicted gene 4737	protein-coding	4.77	0.91
	chr1-53404	chr1	59888053	59888553	+	4.77	500	Intergenic	Intergenic	-24703	NM_001037725	72750	Mm.258250	NM_001037725	ENSMUSG00000041040	Fam117b	2810425F24Rik|6330416D14Rik|Als2cr13	family with sequence similarity 117, member B	protein-coding	4.77	1.09
	chr17-35590	chr17	43137038	43137538	+	4.77	500	Intergenic	MLT2B1|LTR|ERVL	21003	NR_045153	545207	Mm.329050	NR_045153	ENSMUSG00000117011	E130008D07Rik	-	RIKEN cDNA E130008D07 gene	ncRNA	4.77	1.09
	chr10-43209	chr10	3640143	3640643	+	4.77	500	Intergenic	L1MC3|LINE|L1	-99984	NM_001159942	213783	Mm.150831	NM_001033253	ENSMUSG00000040624	Plekhg1	D10Ertd733e|Gm521|mKIAA1209	pleckstrin homology domain containing, family G (with RhoGef domain) member 1	protein-coding	4.77	0.91
	chr3-42981	chr3	38013671	38014171	+	4.77	500	Intergenic	Intergenic	115108	NR_040559	626410	Mm.389417	NR_040559	ENSMUSG00000106461	Gm20755	-	predicted gene, 20755	ncRNA	4.77	1.09
	chr18-12896	chr18	5370980	5371480	+	4.77	500	Intergenic	MTD|LTR|ERVL-MaLR	-36423	NM_001360447	240186	Mm.118257	NM_178722	ENSMUSG00000050945	Zfp438	9430031G09|9430091M14Rik|B830013J05Rik	zinc finger protein 438	protein-coding	4.77	1.09
	chr7-32347	chr7	121159267	121159767	+	4.77	500	intron (NM_139310, intron 27 of 28)	intron (NM_139310, intron 27 of 28)	76093	NM_139310	246190	Mm.221073	NM_139310	ENSMUSG00000034990	Otoa	-	otoancorin	protein-coding	4.77	1.09
	chr16-18544	chr16	49816236	49816736	+	4.77	500	Intergenic	Lx10|LINE|L1	-39168	NM_010581	16423	Mm.31752	NM_010581	ENSMUSG00000055447	Cd47	9130415E20Rik|AA407862|AI848868|AW108519|B430305P08Rik|IAP|Itgp	CD47 antigen (Rh-related antigen, integrin-associated signal transducer)	protein-coding	4.77	1.09
	chr11-38866	chr11	83017117	83017617	+	4.77	500	exon (NM_001167743, exon 2 of 4)	exon (NM_001167743, exon 2 of 4)	3355	NM_001167743	276950	Mm.491599	NM_181545	ENSMUSG00000035208	Slfn8	mSLFN8	schlafen 8	protein-coding	4.77	1.09
	chr5-37654	chr5	109206236	109206736	+	4.77	500	Intergenic	Lx3_Mus|LINE|L1	-14379	NM_001104624	231589	Mm.469883	NM_001104624	ENSMUSG00000091635	Vmn2r13	EG231589|Gm4867	vomeronasal 2, receptor 13	protein-coding	4.77	1.09
	chr13-23074	chr13	35032076	35032576	+	4.77	500	Intergenic	Intergenic	-38182	NR_073427	23986	Mm.491141	NM_011868	ENSMUSG00000021417	Eci2	Acbd2|Drs1|Hca88|Peci	enoyl-Coenzyme A delta isomerase 2	protein-coding	4.77	1.09
	chr7-37132	chr7	116049046	116049546	+	4.77	500	Intergenic	B3A|SINE|B2	-10552	NM_001025559	20679	Mm.323365	NM_011445	ENSMUSG00000051910	Sox6	AI987981|SOX-LZ	SRY (sex determining region Y)-box 6	protein-coding	4.77	0.73
	chr16-18002	chr16	23636524	23637024	+	4.77	500	Intergenic	MIR3|SINE|MIR	26855	NM_023386	67775	Mm.475107	NM_023386	ENSMUSG00000033355	Rtp4	5830458K16Rik|Ifrg28	receptor transporter protein 4	protein-coding	4.77	1.09
	chr13-24357	chr13	6465881	6466381	+	4.77	500	Intergenic	Intergenic	-82026	NM_001360106	69617	Mm.41933	NM_145131	ENSMUSG00000021193	Pitrm1	2310012C15Rik|AA410010|MP-1|MP1|Ntup1|PreP|mKIAA1104	pitrilysin metallepetidase 1	protein-coding	4.77	0.91
	chr3-46643	chr3	20882906	20883406	+	4.77	500	Intergenic	Intergenic	-515979	NM_175086	11608	Mm.134863	NM_175086	ENSMUSG00000054988	Agtr1b	AT1B|AT2R1B|Agtr-1b|Angtr-1b	angiotensin II receptor, type 1b	protein-coding	4.77	0.91
	chr5-36913	chr5	68815274	68815774	+	4.77	500	Intergenic	Intergenic	526185	NM_175519	243043	Mm.234821	NM_175519	ENSMUSG00000037653	Kctd8	A730087N02Rik	potassium channel tetramerisation domain containing 8	protein-coding	4.77	1.09
	chr1-55530	chr1	158083793	158084293	+	4.77	500	Intergenic	Intergenic	272217	NM_207583	240843	Mm.329579	NM_207583	ENSMUSG00000004031	Brinp2	6430517E21Rik|BB361039|Fam5b|mKIAA1747	bone morphogenic protein/retinoic acid inducible neural-specific 2	protein-coding	4.77	0.73
	chr14-16779	chr14	20421381	20421881	+	4.77	500	intron (NM_001163639, intron 13 of 27)	B2_Mm2|SINE|B2	-27997	NM_025440	66242	Mm.23747	NM_025440	ENSMUSG00000049960	Mrps16	1500011E11Rik|Mprs16|S16mt	mitochondrial ribosomal protein S16	protein-coding	4.77	0.73
	chr13-23429	chr13	62962529	62963029	+	4.77	500	Intergenic	Intergenic	-2114	NM_001289926	72061	Mm.188105	NM_028079	ENSMUSG00000021458	Aopep	2010111I01Rik|2300006M17Rik|AP-O|AW742919|ApO|mir-23b|mir-24-1|mir-27b	aminopeptidase O	protein-coding	4.77	1.09
	chr19-20347	chr19	30177840	30178340	+	4.77	500	Intergenic	Intergenic	-2649	NM_138595	104174	Mm.274852	NM_138595	ENSMUSG00000024827	Gldc	D030049L12Rik|D19Wsu57e|b2b2679Clo	glycine decarboxylase	protein-coding	4.77	0.91
	chr10-45881	chr10	86206181	86206681	+	4.77	500	intron (NM_013722, intron 6 of 13)	intron (NM_013722, intron 6 of 13)	-93981	NM_011595	21859	Mm.4871	NM_011595	ENSMUSG00000020044	Timp3	Timp-3	tissue inhibitor of metalloproteinase 3	protein-coding	4.77	1.09
	chr1-53516	chr1	64513933	64514433	+	4.77	500	Intergenic	MTC|LTR|ERVL-MaLR	-18621	NM_009952	12912	Mm.422634	NM_009952	ENSMUSG00000025958	Creb1	2310001E10Rik|3526402H21Rik|AV083133|Creb|Creb-1	cAMP responsive element binding protein 1	protein-coding	4.77	0.91
	chr9-21771	chr9	78736688	78737188	+	4.77	500	Intergenic	Lx5c|LINE|L1	121392	NM_153098	235505	Mm.32955	NM_153098	ENSMUSG00000046186	Cd109	9930012E15Rik|AI480638|GARP	CD109 antigen	protein-coding	4.77	1.09
	chr13-23669	chr13	89587230	89587730	+	4.77	500	intron (NM_013500, intron 2 of 4)	B4A|SINE|B4	46844	NM_013500	12950	Mm.266790	NM_013500	ENSMUSG00000021613	Hapln1	BB099155|CLP|Crtl1|Crtl1l|LP|LP-1	hyaluronan and proteoglycan link protein 1	protein-coding	4.77	0.73
	chr2-51306	chr2	172327490	172327990	+	4.77	500	Intergenic	IMPB_01|Satellite|Satellite	-17837	NM_025912	67017	Mm.30013	NM_025912	ENSMUSG00000027495	Fam210b	2010011I20Rik|AI430961|AV108736	family with sequence similarity 210, member B	protein-coding	4.77	1.09
	chr3-48095	chr3	70584386	70584886	+	4.77	500	Intergenic	Intergenic	222655	NR_040556	625901	Mm.366028	NR_040556	ENSMUSG00000097252	Gm6634	EG625901	predicted gene 6634	ncRNA	4.77	1.09
	chr9-22148	chr9	117372103	117372603	+	4.77	500	intron (NM_001172121, intron 1 of 14)	intron (NM_001172121, intron 1 of 14)	-119870	NM_001172126	207181	Mm.326411	NM_178660	ENSMUSG00000039607	Rbms3	6720477E09Rik|8430436O14Rik	RNA binding motif, single stranded interacting protein	protein-coding	4.77	1.09
	chr16-20178	chr16	65509721	65510221	+	4.77	500	Intergenic	Intergenic	-10541	NM_008849	18736	Mm.355440	NM_008849	ENSMUSG00000004842	Pou1f1	GHF-1|Hmp1|Pit-1|Pit1|Pit1-rs1|dw|dwarf	POU domain, class 1, transcription factor 1	protein-coding	4.77	0.73
	chr3-48151	chr3	77200746	77201246	+	4.77	500	Intergenic	Intergenic	1125413	NM_001253719	213262	Mm.379337	NM_178673	ENSMUSG00000034098	Fstl5	9130207J01Rik	follistatin-like 5	protein-coding	4.77	1.09
	chr3-47359	chr3	50706862	50707362	+	4.77	500	Intergenic	Lx5b|LINE|L1	-263499	NM_011990	26570	Mm.260988	NM_011990	ENSMUSG00000027737	Slc7a11	9930009M05Rik|AI451155|sut|xCT	solute carrier family 7 (cationic amino acid transporter, y+ system), member 11	protein-coding	4.77	1.09
	chr7-37163	chr7	120220139	120220639	+	4.77	500	intron (NM_026458, intron 6 of 30)	intron (NM_026458, intron 6 of 30)	16425	NM_026458	67928	Mm.158178	NM_026458	ENSMUSG00000062017	Abca14	1700110B15Rik|4930539G24Rik	ATP-binding cassette, sub-family A (ABC1), member 14	protein-coding	4.77	0.91
	chr2-49971	chr2	110303946	110304446	+	4.77	500	intron (NM_130452, intron 1 of 6)	intron (NM_130452, intron 1 of 6)	1529	NM_130452	170442	Mm.27335	NM_130452	ENSMUSG00000041660	Bbox1	AI874739	butyrobetaine (gamma), 2-oxoglutarate dioxygenase 1 (gamma-butyrobetaine hydroxylase)	protein-coding	4.77	0.73
	chr16-17270	chr16	53997308	53997808	+	4.77	500	Intergenic	L1Md_F|LINE|L1	-1181814	NR_040495	73820	Mm.60493	NR_040495	ENSMUSG00000116611	4930404A05Rik	-	RIKEN cDNA 4930404A05 gene	ncRNA	4.77	0.91
	chr8-19662	chr8	125875134	125875634	+	4.77	500	intron (NM_175561, intron 7 of 33)	intron (NM_175561, intron 7 of 33)	-22530	NR_155422	102632990	Mm.429446	NR_155422		A730098A19Rik	-	RIKEN cDNA A730098A19 gene	ncRNA	4.77	1.09
	chr14-16647	chr14	7958528	7959028	+	4.77	500	intron (NM_001371278, intron 1 of 1)	intron (NM_001371278, intron 1 of 1)	1478	NM_001371278									4.77	0.91
	chr10-46920	chr10	114615758	114616258	+	4.77	500	intron (NM_146241, intron 3 of 18)	intron (NM_146241, intron 3 of 18)	185362	NM_146241	237553	Mm.445550	NM_146241	ENSMUSG00000050663	Trhde	9330155P21Rik	TRH-degrading enzyme	protein-coding	4.77	1.09
	chr16-18685	chr16	75748018	75748518	+	4.77	500	Intergenic	ORR1B1|LTR|ERVL-MaLR	18550	NM_030201	110920	Mm.26704	NM_030201	ENSMUSG00000032932	Hspa13	1600002I10Rik|AV006182|B230217N24Rik|Stch	heat shock protein 70 family, member 13	protein-coding	4.77	1.09
	chr3-43791	chr3	69302615	69303115	+	4.77	500	Intergenic	ORR1B1-int|LTR|ERVL-MaLR	-14053	NM_178726	242083	Mm.40577	NM_178726	ENSMUSG00000027784	Ppm1l	3222401G13|5930404J21Rik|AI481720|AW045850|PP2C|PP2Cepsilon|Pp2ce|Ppp2ce|mKIAA4175	protein phosphatase 1 (formerly 2C)-like	protein-coding	4.77	1.09
	chr8-20780	chr8	108612355	108612855	+	4.77	500	Intergenic	Intergenic	-27928	NR_077224	109215	Mm.65282	NR_077224	ENSMUSG00000110613	Lncbate1	3010033K07Rik|Lnc-BATE1	brown adipose tissue enriched long non-coding RNA 1	ncRNA	4.77	1.09
	chr8-19878	chr8	21954485	21954985	+	4.77	500	Intergenic	ORR1A2-int|LTR|ERVL-MaLR	-3979	NM_001081662	97476	Mm.297693	NM_001081662	ENSMUSG00000079112	Fam90a1a	C86695	family with sequence similarity 90, member A1A	protein-coding	4.77	1.09
	chr12-20502	chr12	79628833	79629333	+	4.77	500	intron (NM_009014, intron 7 of 10)	intron (NM_009014, intron 7 of 10)	295650	NR_131075	77290	Mm.395042	NR_131073	ENSMUSG00000112765	9430078K24Rik	-	RIKEN cDNA 9430078K24 gene	ncRNA	4.77	0.91
	chr13-25679	chr13	92532635	92533135	+	4.77	500	Intergenic	Intergenic	-2075	NM_173392	218441	Mm.259585	NM_173392	ENSMUSG00000021706	Zfyve16	AI035632|B130024H06Rik|B130031L15|mKIAA0305	zinc finger, FYVE domain containing 16	protein-coding	4.77	1.09
	chr13-23628	chr13	84663795	84664295	+	4.77	500	Intergenic	Lx5b|LINE|L1	441749	NR_029419	72745	Mm.295063	NM_175187	ENSMUSG00000035762	Tmem161b	2810446P07Rik|AI843389	transmembrane protein 161B	protein-coding	4.77	0.91
	chr2-53570	chr2	90632482	90632982	+	4.77	500	Intergenic	Intergenic	-44483	NM_021512	59015	Mm.24532	NM_021512	ENSMUSG00000051329	Nup160	160kDa|2810011M03Rik|AA414952|AU020188|Gtl-13|Gtl1-13|Gtl13|mKIAA0197	nucleoporin 160	protein-coding	4.77	1.09
	chr12-21266	chr12	12948285	12948785	+	4.77	500	Intergenic	MTE2a|LTR|ERVL-MaLR	-6699	NM_008709	18109	Mm.16469	NM_008709	ENSMUSG00000037169	Mycn	N-myc|Nmyc|Nmyc-1|Nmyc1|bHLHe37|c-nmyc	v-myc avian myelocytomatosis viral related oncogene, neuroblastoma derived	protein-coding	4.77	1.09
	chr1-51331	chr1	162641429	162641929	+	4.77	500	intron (NM_010865, intron 1 of 2)	MIR3|SINE|MIR	2529	NM_010865	17926	Mm.10694	NM_010865	ENSMUSG00000026697	Myoc	AI957332|GLC1A|TIGR	myocilin	protein-coding	4.77	0.91
	chr10-40939	chr10	40331896	40332396	+	4.77	500	Intergenic	MTEa|LTR|ERVL-MaLR	-17162	NM_001291817	78334	Mm.200924	NM_198164	ENSMUSG00000038481	Cdk19	2700084L06Rik|AI845279|AW228747|CDK11|Cdc2l6|mKIAA1028	cyclin-dependent kinase 19	protein-coding	4.77	1.09
	chr3-47132	chr3	38328394	38328894	+	4.77	500	Intergenic	Intergenic	-120525	NR_040541	71342	Mm.410782	NR_040541	ENSMUSG00000106002	5430434I15Rik	-	RIKEN cDNA 5430434I15 gene	ncRNA	4.77	1.09
	chr17-42189	chr17	31088419	31088919	+	4.77	500	intron (NM_009593, intron 2 of 14)	intron (NM_009593, intron 2 of 14)	30975	NM_009593	11307	Mm.15691	NM_009593	ENSMUSG00000024030	Abcg1	AW413978|Abc8|White	ATP binding cassette subfamily G member 1	protein-coding	4.77	1.09
	chr9-23371	chr9	96583790	96584290	+	4.77	500	intron (NM_053268, intron 5 of 23)	L1MDa|LINE|L1	47463	NM_053268	114713	Mm.124502	NM_053268	ENSMUSG00000032413	Rasa2	5430433H21Rik|AA517451|AU023900|GAP1m	RAS p21 protein activator 2	protein-coding	4.77	0.91
	chr19-20019	chr19	20971808	20972308	+	4.77	500	Intergenic	RLTR41C|LTR|ERV1	-17856	NM_028953	13409	Mm.219585	NM_028953	ENSMUSG00000024749	Tmc1	4933416G09Rik|Beethoven|Bth|CWEA1|dn	transmembrane channel-like gene family 1	protein-coding	4.77	1.09
	chr4-56478	chr4	119842704	119843204	+	4.77	500	intron (NM_010657, intron 1 of 8)	intron (NM_010657, intron 1 of 8)	28276	NM_010657	16656	Mm.302758	NM_010657	ENSMUSG00000028634	Hivep3	2900056N03Rik|A130075N07|AI848000|E030045D18Rik|KBP-1|KBP1|Krc|Rc|Schnurri-3|Shn3|Zas3	human immunodeficiency virus type I enhancer binding protein 3	protein-coding	4.77	1.09
	chr15-54976	chr15	57227514	57228014	+	4.77	500	Intergenic	L1M2|LINE|L1	37397	NM_001357930	210463	Mm.26555	NM_172378	ENSMUSG00000022366	Slc22a22	oat-pg	solute carrier family 22 (organic cation transporter), member 22	protein-coding	4.77	1.09
	chr9-22966	chr9	60352482	60352982	+	4.77	500	intron (NM_001040426, intron 6 of 17)	intron (NM_001040426, intron 6 of 17)	158303	NM_001040426	207596	Mm.28791	NM_172444	ENSMUSG00000032289	Thsd4	ADAMTSL-6|ADAMTSL6|AI585901|Adamtsl4|B230114P05Rik	thrombospondin, type I, domain containing 4	protein-coding	4.77	1.09
	chr13-25257	chr13	59925281	59925781	+	4.77	500	Intergenic	Intergenic	-102384	NM_153538	214290	Mm.233082	NM_153538	ENSMUSG00000035248	Tut7	6030448M23Rik|AA420405|Tent3b|Zcchc6	terminal uridylyl transferase 7	protein-coding	4.77	0.91
	chr5-41478	chr5	141595464	141595964	+	4.77	500	intron (NM_177879, intron 2 of 44)	intron (NM_177879, intron 2 of 44)	354180	NM_177879	330222	Mm.151931	NM_177879	ENSMUSG00000039683	Sdk1	5330440E10|6720466O15Rik	sidekick cell adhesion molecule 1	protein-coding	4.77	1.09
	chr11-38490	chr11	68751007	68751507	+	4.77	500	intron (NM_175260, intron 5 of 40)	intron (NM_175260, intron 5 of 40)	59342	NM_175260	77579	Mm.218233	NM_175260	ENSMUSG00000020900	Myh10	5730504C04Rik|9330167F11Rik|Fltn|Myhn-2|Myhn2|NMHC II-B|NMHC-B|NMHCII-B|NMMHC II-b|NMMHC-B|NMMHC-IIB|SMemb|mKIAA3005	myosin, heavy polypeptide 10, non-muscle	protein-coding	4.77	1.09
	chr11-33920	chr11	44218360	44218860	+	4.77	500	Intergenic	Intergenic	-181453	NM_001303244	16160	Mm.239707	NM_008352	ENSMUSG00000004296	Il12b	Il-12b|Il-12p40|Il12p40|p40	interleukin 12b	protein-coding	4.77	0.91
	chr3-43958	chr3	83491962	83492462	+	4.77	500	Intergenic	Intergenic	81906	NR_036591	69460	Mm.389464	NR_036591	ENSMUSG00000101334	1700028M03Rik	-	RIKEN cDNA 1700028M03 gene	ncRNA	4.77	1.09
	chr5-39075	chr5	26692663	26693163	+	4.77	500	Intergenic	Intergenic	-124444	NM_010075	13483	Mm.42078	NM_010075	ENSMUSG00000061576	Dpp6	B930011P16Rik|D5Buc3|D5Buc4|D5Buc5|DPP VI|Dpp-6|Gm1377|In(5)6H-p|Peplb|Rw	dipeptidylpeptidase 6	protein-coding	4.77	0.55
	chr8-19765	chr8	10138530	10139030	+	4.77	500	Intergenic	LTR85a|LTR|Gypsy?	-15131	NM_001319151	244281	Mm.422761	NM_001081397	ENSMUSG00000039057	Myo16	BM140241|C230040D10Rik|Gm1105|NYAP3|mKIAA0865	myosin XVI	protein-coding	4.77	0.18
	chr5-36039	chr5	21927610	21928110	+	4.77	500	intron (NM_011261, intron 49 of 63)	intron (NM_011261, intron 49 of 63)	-62256	NM_030727	80979	Mm.160370	NM_030727	ENSMUSG00000029015	Slc26a5	Pres|prestin	solute carrier family 26, member 5	protein-coding	4.77	0.91
	chr5-40522	chr5	98754733	98755233	+	4.77	500	intron (NM_001024614, intron 4 of 5)	B3A|SINE|B2	-99432	NM_173404	110075	Mm.136461	NM_173404	ENSMUSG00000029335	Bmp3	9530029I04Rik	bone morphogenetic protein 3	protein-coding	4.77	1.09
	chr6-39189	chr6	58315636	58316136	+	4.77	500	Intergenic	L1Md_F2|LINE|L1	8589	NM_053232	113859	Mm.377156	NM_053232	ENSMUSG00000091734	Vmn1r29	V1rc2	vomeronasal 1 receptor 29	protein-coding	4.77	0.73
	chr5-38655	chr5	13470943	13471443	+	4.77	500	intron (NM_001243072, intron 4 of 17)	intron (NM_001243072, intron 4 of 17)	71884	NM_009152	20346	Mm.372039	NM_009152	ENSMUSG00000028883	Sema3a	Hsema-I|SEMA1|SemD|Semad|coll-1	sema domain, immunoglobulin domain (Ig), short basic domain, secreted, (semaphorin) 3A	protein-coding	4.77	1.09
	chr9-21847	chr9	87017398	87017898	+	4.77	500	intron (NM_001037907, intron 3 of 3)	intron (NM_001037907, intron 3 of 3)	2111	NM_001037907	382089	Mm.92244	NM_001037907	ENSMUSG00000047897	Ripply2	C030002E08Rik|Gm1122	ripply transcriptional repressor 2	protein-coding	4.77	0.91
	chr4-46102	chr4	98734230	98734730	+	4.77	500	intron (NM_001081202, intron 3 of 4)	intron (NM_001081202, intron 3 of 4)	7726	NM_001081202	381591	Mm.34340	NM_001081202	ENSMUSG00000087166	L1td1	AA546746|AB211064|D76865|ECAT11	LINE-1 type transposase domain containing 1	protein-coding	4.77	1.09
	chr10-47377	chr10	128609335	128609835	+	4.77	500	Intergenic	B1_Mur2|SINE|Alu	16921	NM_013765	27370	Mm.32118	NM_013765	ENSMUSG00000025362	Rps26	-	ribosomal protein S26	protein-coding	4.77	0.73
	chr6-37717	chr6	9479155	9479655	+	4.77	500	Intergenic	Lx5|LINE|L1	529386	NM_008751	18231	Mm.46954	NM_008751	ENSMUSG00000046178	Nxph1	C130005L03Rik	neurexophilin 1	protein-coding	4.77	0.91
	chr13-25526	chr13	81327151	81327651	+	4.77	500	intron (NM_054053, intron 83 of 89)	intron (NM_054053, intron 83 of 89)	305743	NM_054053	110789	Mm.288694	NM_054053	ENSMUSG00000069170	Adgrv1	Frings|Gpr98|Mass1|Mgr1|VLGR1	adhesion G protein-coupled receptor V1	protein-coding	4.77	0.36
	chr13-25214	chr13	56012704	56013204	+	4.77	500	Intergenic	Intergenic	122596	NM_001159513	26914	Mm.283802	NM_012015	ENSMUSG00000015937	H2afy	H2AF12M|mH2a1|macroH2A1	H2A histone family, member Y	protein-coding	4.77	1.09
	chr5-37554	chr5	106849230	106849730	+	4.77	500	intron (NM_177873, intron 35 of 39)	intron (NM_177873, intron 35 of 39)	76410	NM_177873	330149	Mm.121664	NM_177873	ENSMUSG00000043410	Hfm1	A330009G12Rik|Gm1046|Mer3|Sec63d1	HFM1, ATP-dependent DNA helicase homolog	protein-coding	4.77	0.91
	chr1-54154	chr1	85739616	85740116	+	4.77	500	Intergenic	Intergenic	-3260	NM_177055	319997	Mm.116691	NM_177055	ENSMUSG00000052760	A630001G21Rik	-	RIKEN cDNA A630001G21 gene	protein-coding	4.77	1.09
	chr1-54466	chr1	95287234	95287734	+	4.77	500	Intergenic	MTE2a|LTR|ERVL-MaLR	-26144	NM_026321	67698	Mm.272705	NM_026321	ENSMUSG00000051185	Fam174a	2310044D20Rik|Fam174|Naa6|Tmem157	family with sequence similarity 174, member A	protein-coding	4.77	1.09
	chrX-7501	chrX	68496397	68496897	+	4.77	500	Intergenic	Intergenic	181752	NR_033481	100038638	Mm.368431	NR_033481	ENSMUSG00000096946	Fmr1os	Asfmr1|Gm10474	fragile X mental retardation 1, opposite strand	ncRNA	4.77	1.09
	chr5-39997	chr5	69311333	69311833	+	4.77	500	intron (NM_175519, intron 1 of 1)	intron (NM_175519, intron 1 of 1)	30126	NM_175519	243043	Mm.234821	NM_175519	ENSMUSG00000037653	Kctd8	A730087N02Rik	potassium channel tetramerisation domain containing 8	protein-coding	4.77	0.73
	chr17-38012	chr17	17468390	17468890	+	4.77	500	Intergenic	Intergenic	65954	NM_025681	66643	Mm.268018	NM_025681	ENSMUSG00000047786	Lix1	5730466L18Rik	limb and CNS expressed 1	protein-coding	4.77	1.09
	chr18-12592	chr18	61421079	61421579	+	4.77	500	Intergenic	Intergenic	-20917	NM_001364996	170826	Mm.415302	NM_133249	ENSMUSG00000033871	Ppargc1b	4631412G21Rik|PGC-1beta|PGC-1beta/ERRL1|PPARGC-1-beta|Perc	peroxisome proliferative activated receptor, gamma, coactivator 1 beta	protein-coding	4.77	1.09
	chr15-62553	chr15	90703797	90704297	+	4.77	500	Intergenic	Intergenic	-24659	NM_001033851	66871	Mm.290991	NM_025815	ENSMUSG00000052560	Cpne8	1200003E11Rik|1500031E20Rik	copine VIII	protein-coding	4.77	0.73
	chr8-19784	chr8	11753450	11753950	+	4.77	500	intron (NM_001113517, intron 1 of 18)	intron (NM_001113517, intron 1 of 18)	-4630	NM_017402	54126	Mm.244068	NM_017402	ENSMUSG00000031511	Arhgef7	Cool|PIX|Pak3bp|betaPix|betaPix-b|betaPix-c|cool-1|mKIAA0142|p85Cool1|p85SPR	Rho guanine nucleotide exchange factor (GEF7)	protein-coding	4.77	1.09
	chr10-45016	chr10	50554909	50555409	+	4.77	500	Intergenic	Lx2B2|LINE|L1	-37510	NM_198007	77987	Mm.222497	NM_198007	ENSMUSG00000038774	Ascc3	ASC1p200|B630009I04Rik|BC023451|D430001L07Rik|D630041L21|Helic1|RNAH	activating signal cointegrator 1 complex subunit 3	protein-coding	4.77	1.09
	chr5-38741	chr5	16636535	16637035	+	4.77	500	Intergenic	Intergenic	82884	NM_001289461	15234	Mm.267078	NM_010427	ENSMUSG00000028864	Hgf	C230052L06Rik|HGF/SF|NK1|NK2|SF|SF/HGF	hepatocyte growth factor	protein-coding	4.77	1.09
	chr15-50928	chr15	73479134	73479634	+	4.77	500	Intergenic	Intergenic	-33176	NM_001081066	105841	Mm.322557	NM_001081066	ENSMUSG00000036661	Dennd3	AI447457|E030003N15Rik	DENN/MADD domain containing 3	protein-coding	4.77	1.09
	chr7-35780	chr7	52318934	52319434	+	4.77	500	Intergenic	Intergenic	-303468	NM_001195601	100503036	Mm.279725	NM_001195601	ENSMUSG00000094445	1700015G11Rik	Ccdc179	RIKEN cDNA 1700015G11 gene	protein-coding	4.77	0.91
	chr12-21538	chr12	33705023	33705523	+	4.77	500	Intergenic	MT2B1|LTR|ERVL	-223152	NM_033522	114712	Mm.204643	NM_033522	ENSMUSG00000046518	Ferd3l	Mnato3|N-twist|Nato|Nato3|Ntwist|Ptfb|bHLHa31|fer3	Fer3 like bHLH transcription factor	protein-coding	4.77	0.91
	chr2-52759	chr2	54137875	54138375	+	4.77	500	Intergenic	Lx5c|LINE|L1	-52573	NM_023396	67874	Mm.27086	NM_023396	ENSMUSG00000075334	Rprm	2410012A13Rik|Reprimo	reprimo, TP53 dependent G2 arrest mediator candidate	protein-coding	4.77	0.91
	chr13-24956	chr13	37353980	37354480	+	4.77	500	intron (NM_010745, intron 1 of 4)	intron (NM_010745, intron 1 of 4)	8885	NM_010745	17084	Mm.2639	NM_010745	ENSMUSG00000021423	Ly86	MD-1|MD1|ly86_tv2	lymphocyte antigen 86	protein-coding	4.77	0.91
	chr5-38510	chr5	4633830	4634330	+	4.77	500	Intergenic	Intergenic	124136	NM_021457	14362	Mm.246003	NM_021457	ENSMUSG00000044674	Fzd1	AW227548|FZ-1|Fz1	frizzled class receptor 1	protein-coding	4.77	1.09
	chr8-19071	chr8	66738913	66739413	+	4.77	500	Intergenic	Intergenic	41741	NM_010934	18166	Mm.5112	NM_010934	ENSMUSG00000036437	Npy1r	NPY1-R|Npyr|Y1-R	neuropeptide Y receptor Y1	protein-coding	4.77	1.09
	chr8-20175	chr8	48894881	48895381	+	4.77	500	Intergenic	Intergenic	-220441	NM_011857	23965	Mm.42191	NM_011857	ENSMUSG00000031561	Tenm3	2610100B16Rik|Odz1|Odz3|Ten-m3|mKIAA1455	teneurin transmembrane protein 3	protein-coding	4.77	0.55
	chr17-42524	chr17	40774418	40774918	+	4.77	500	intron (NM_001204071, intron 8 of 9)	L1_Mus3|LINE|L1	19478	NM_009420	22024	Mm.1296	NM_009420	ENSMUSG00000023930	Crisp2	CRISP-2|GAPDL5|Tpx-1|Tpx1	cysteine-rich secretory protein 2	protein-coding	4.77	1.09
	chr19-20621	chr19	38091070	38091570	+	4.77	500	Intergenic	Intergenic	-5759	NM_181748	107221	Mm.35288	NM_181748	ENSMUSG00000054200	Ffar4	AI552415|Ffa4|GT01|Gpr120|Gpr129|KPG_013|O3far1|Pgr4	free fatty acid receptor 4	protein-coding	4.77	0.91
	chr7-36520	chr7	81112992	81113492	+	4.77	500	Intergenic	Intergenic	-1557	NM_001004184	434203	Mm.389909	NM_001004184	ENSMUSG00000025726	Slc28a1	Cnt1	solute carrier family 28 (sodium-coupled nucleoside transporter), member 1	protein-coding	4.77	0.91
	chr8-20176	chr8	48908605	48909105	+	4.77	500	Intergenic	Intergenic	-234165	NM_011857	23965	Mm.42191	NM_011857	ENSMUSG00000031561	Tenm3	2610100B16Rik|Odz1|Odz3|Ten-m3|mKIAA1455	teneurin transmembrane protein 3	protein-coding	4.77	0.91
	chr18-13431	chr18	61486389	61486889	+	4.77	500	Intergenic	Intergenic	-2032	NR_045419	442846	Mm.417648	NR_045419	ENSMUSG00000118229	Lncbate10	A530050N04Rik	brown adipose tissue enriched long noncoding RNA 10	ncRNA	4.77	1.09
	chr10-40607	chr10	33059693	33060193	+	4.77	500	Intergenic	RLTR12E|LTR|ERVK	-23540	NM_029726	76757	Mm.338508	NM_029726	ENSMUSG00000019787	Trdn	2310045H21Rik|EG432451|TDN	triadin	protein-coding	4.77	1.09
	chr3-41602	chr3	139510668	139511168	+	4.77	500	intron (NM_198659, intron 11 of 13)	B1_Mus1|SINE|Alu	269841	NR_153353	102635321	Mm.121751	NR_153353	ENSMUSG00000106505	Gm32693	-	predicted gene, 32693	ncRNA	4.77	0.36
	chr19-20623	chr19	38163795	38164295	+	4.77	500	intron (NM_033614, intron 14 of 21)	intron (NM_033614, intron 14 of 21)	31264	NM_033614	110855	Mm.450141	NM_033614	ENSMUSG00000024992	Pde6c	cpfl1	phosphodiesterase 6C, cGMP specific, cone, alpha prime	protein-coding	4.77	0.91
	chr3-47062	chr3	36729251	36729751	+	4.77	500	Intergenic	Intergenic	-39334	NM_019510	22065	Mm.74363	NM_019510	ENSMUSG00000027716	Trpc3	Mwk|Trcp3|Trp3|Trrp3	transient receptor potential cation channel, subfamily C, member 3	protein-coding	4.77	0.91
	chr18-13201	chr18	38959928	38960428	+	4.77	500	intron (NM_001033789, intron 4 of 4)	RMER10B|LTR|ERVL	-32967	NM_175164	71302	Mm.329396	NM_175164	ENSMUSG00000036452	Arhgap26	1810044B20Rik|2610010G17Rik|4933432P15Rik|AI853435|mKIAA0621	Rho GTPase activating protein 26	protein-coding	4.77	0.91
	chr15-57395	chr15	103545495	103545995	+	4.77	500	Intergenic	Intergenic	-7753	NM_021391	58200	Mm.143788	NM_021391	ENSMUSG00000022490	Ppp1r1a	0610038N18Rik|I-1	protein phosphatase 1, regulatory inhibitor subunit 1A	protein-coding	4.77	0.91
	chr11-38324	chr11	60087833	60088333	+	4.77	500	Intergenic	Intergenic	-16930	NM_009021	19377	Mm.296366	NM_009021	ENSMUSG00000062115	Rai1	Gt1	retinoic acid induced 1	protein-coding	4.77	1.09
	chr4-50166	chr4	92577730	92578230	+	4.77	500	Intergenic	Intergenic	-430759	NM_027034	69314	Mm.55891	NM_027034	ENSMUSG00000028533	Izumo3	1700011H22Rik	IZUMO family member 3	protein-coding	4.77	0.91
	chr12-21511	chr12	32450472	32450972	+	4.77	500	Intergenic	ID_B1|SINE|B4	71933	NM_001162903	72123	Mm.341352	NM_028111	ENSMUSG00000090946	Ccdc71l	2010109K11Rik|AV375874	coiled-coil domain containing 71 like	protein-coding	4.77	1.09
	chr5-33652	chr5	26162106	26162606	+	4.77	500	Intergenic	B3A|SINE|B2	-40931	NM_001134299	434689	Mm.484129	NM_001134299	ENSMUSG00000067698	Gm10220	-	predicted gene 10220	protein-coding	4.77	0.91
	chr12-21475	chr12	30870627	30871127	+	4.77	500	Intergenic	Intergenic	-13447	NM_001159743	100294583	Mm.399726	NM_001159743	ENSMUSG00000054204	Alkal2	6230419C23Rik|Fam150b	ALK and LTK ligand 2	protein-coding	4.77	0.73
	chr15-61692	chr15	71932766	71933266	+	4.77	500	intron (NM_027174, intron 22 of 63)	intron (NM_027174, intron 22 of 63)	101211	NM_027174	69700	Mm.322500	NM_027174	ENSMUSG00000079022	Col22a1	2310067L16Rik|C80743	collagen, type XXII, alpha 1	protein-coding	4.77	1.09
	chr9-22355	chr9	20258295	20258795	+	4.77	500	intron (NM_146560, intron 1 of 1)	Lx2B2|LINE|L1	21383	NM_146560	258553	Mm.334989	NM_146560	ENSMUSG00000066897	Olfr872	MOR145-3	olfactory receptor 872	protein-coding	4.77	1.09
	chr11-39682	chr11	114446617	114447117	+	4.58	500	intron (NR_027643, intron 1 of 2)	intron (NR_027643, intron 1 of 2)	1993	NR_027643	319819	Mm.50754	NM_177008	ENSMUSG00000062391	4932435O22Rik	-	RIKEN cDNA 4932435O22 gene	ncRNA	4.58	1.09
	chr4-52942	chr4	61901919	61902419	+	4.58	500	Intergenic	MuRRS-int|LTR|ERV1	-66989	NM_008649	17844	Mm.445286	NM_008649	ENSMUSG00000058523	Mup5	Mup18	major urinary protein 5	protein-coding	4.58	1.09
	chr4-56253	chr4	114353224	114353724	+	4.58	500	Intergenic	(TG)n|Simple_repeat|Simple_repeat	-53250	NM_001085549	666048	Mm.331779	NM_001085549	ENSMUSG00000070867	Trabd2b	Gm12824|Hkat	TraB domain containing 2B	protein-coding	4.58	1.09
	chr3-49526	chr3	124743078	124743578	+	4.58	500	Intergenic	Lx4A|LINE|L1	-162237	NM_001368235	384775	Mm.489851	NM_001368235	ENSMUSG00000039174	1700003H04Rik	4930538K10Rik|4933400D22Rik	RIKEN cDNA 1700003H04 gene	protein-coding	4.58	1.09
	chr6-44674	chr6	143452937	143453437	+	4.58	500	Intergenic	B3|SINE|B2	82321	NR_155418	75904	Mm.414916	NR_155418	ENSMUSG00000084971	4930579D09Rik	-	RIKEN cDNA 4930579D09 gene	ncRNA	4.58	1.09
	chr10-45431	chr10	70043751	70044251	+	4.58	500	Intergenic	Intergenic	-53120	NM_001111121	76551	Mm.281741	NM_001111121	ENSMUSG00000048701	Ccdc6	2810012H18Rik|AA536681|AA960498|AW061011	coiled-coil domain containing 6	protein-coding	4.58	0.36
	chr4-43700	chr4	42946501	42947001	+	4.58	500	Intergenic	Intergenic	-3116	NM_001355438	56323	Mm.20437	NM_019874	ENSMUSG00000036052	Dnajb5	1110058L06Rik|AI462558|Hsc40|Hsp40-3	DnaJ heat shock protein family (Hsp40) member B5	protein-coding	4.58	0.73
	chr8-20487	chr8	82453354	82453854	+	4.58	500	Intergenic	Intergenic	-51018	NM_001254747	16168	Mm.4392	NM_008357	ENSMUSG00000031712	Il15	AI503618|IL-15	interleukin 15	protein-coding	4.58	1.09
	chr10-39594	chr10	6776445	6776945	+	4.58	500	intron (NM_001302795, intron 1 of 5)	L1_Mus3|LINE|L1	-11875	NM_001304950	18390	Mm.438000	NM_011013	ENSMUSG00000000766	Oprm1	M-OR-1|MOP-R|MOR-1|MOR-1O|Oprm|mor|muOR	opioid receptor, mu 1	protein-coding	4.58	1.09
	chr2-53298	chr2	74673252	74673752	+	4.58	500	Intergenic	Intergenic	-1511	NM_008274	15432	Mm.57124	NM_008274	ENSMUSG00000001823	Hoxd12	Hox-4.7|Hox-5.6	homeobox D12	protein-coding	4.58	1.09
	chr10-47067	chr10	118029725	118030225	+	4.58	500	Intergenic	Intergenic	104516	NR_045342	71067	Mm.410793	NR_045342	ENSMUSG00000112500	4933411E08Rik	-	RIKEN cDNA 4933411E08 gene	ncRNA	4.58	1.09
	chr14-16718	chr14	14858927	14859427	+	4.58	500	intron (NM_001195229, intron 14 of 34)	intron (NM_001195229, intron 14 of 34)	38362	NM_001195229	674895	Mm.317563	NM_001034865	ENSMUSG00000042567	Nek10	Gm282	NIMA (never in mitosis gene a)- related kinase 10	protein-coding	4.58	0.91
	chr9-21834	chr9	85942951	85943451	+	4.58	500	Intergenic	RLTR10D2|LTR|ERVK	100349	NM_001164792	21983	Mm.20864	NM_011627	ENSMUSG00000035274	Tpbg	5T4|AW495680|WAIF1	trophoblast glycoprotein	protein-coding	4.58	1.09
	chr5-39325	chr5	36961628	36962128	+	4.58	500	Intergenic	RMER5|LTR|ERV1	27104	NM_011716	22393	Mm.20916	NM_011716	ENSMUSG00000039474	Wfs1	AI481085|wolframin	wolframin ER transmembrane glycoprotein	protein-coding	4.58	1.09
	chr3-48512	chr3	90129248	90129748	+	4.58	500	intron (NM_029937, intron 8 of 39)	B1_Mur3|SINE|Alu	25360	NM_029937	77595	Mm.159949	NM_029937	ENSMUSG00000027939	Nup210l	4930548O11Rik|R26-EGFP|Tg(Gt(ROSA)26Sor-EGFP)130910Eps	nucleoporin 210-like	protein-coding	4.58	0.91
	chr6-43727	chr6	96793688	96794188	+	4.58	500	Intergenic	Intergenic	266473	NM_177233	320701	Mm.131700	NM_177233	ENSMUSG00000046500	Tafa4	C130034I18Rik|Fam19a4|Fam19a4 Tafa-4|Tafa-4	TAFA chemokine like family member 4	protein-coding	4.58	0.73
	chr3-49229	chr3	117735630	117736130	+	4.58	500	Intergenic	RMER1B|Other|Other	133056	NM_029655	76561	Mm.33824	NM_029655	ENSMUSG00000028007	Snx7	2510028H01Rik	sorting nexin 7	protein-coding	4.58	0.55
	chr7-32468	chr7	132541021	132541521	+	4.58	500	Intergenic	Intergenic	35127	NM_016978	18242	Mm.13694	NM_016978	ENSMUSG00000030934	Oat	AI194874|rhg	ornithine aminotransferase	protein-coding	4.58	1.09
	chr3-42560	chr3	19522985	19523485	+	4.58	500	intron (NM_025489, intron 1 of 4)	intron (NM_025489, intron 1 of 4)	-8012	NM_001163537	66326	Mm.45615	NM_025489	ENSMUSG00000027606	Dnajc5b	1700008A05Rik	DnaJ heat shock protein family (Hsp40) member C5 beta	protein-coding	4.58	1.09
	chr3-46439	chr3	15066105	15066605	+	4.58	500	Intergenic	Intergenic	95154	NR_040549	77127	Mm.195792	NR_040549	ENSMUSG00000098008	A930001A20Rik	-	RIKEN cDNA A930001A20 gene	ncRNA	4.58	1.09
	chr12-21976	chr12	69989703	69990203	+	4.58	500	Intergenic	RMER6A|LTR|ERVK	-2951	NM_022028	64010	Mm.390480	NM_022028	ENSMUSG00000021067	Sav1	1700040G09Rik|Salv|Sav|WW45|Wwp3|Wwp4	salvador family WW domain containing 1	protein-coding	4.58	1.09
	chr6-39153	chr6	55828411	55828911	+	4.58	500	Intergenic	Intergenic	-8357	NM_001081665	232016	Mm.333084	NM_001081665	ENSMUSG00000037973	Itprid1	Ccdc129|D530004J12Rik|Gm458	ITPR interacting domain containing 1	protein-coding	4.58	1.09
	chr12-22346	chr12	86157881	86158381	+	4.58	500	intron (NM_029601, intron 4 of 7)	B4A|SINE|B4	-11210	NR_046081	328136	Mm.312050	NR_046081	ENSMUSG00000097543	Gm805	-	predicted gene 805	ncRNA	4.58	1.09
	chr10-43338	chr10	8612793	8613293	+	4.58	500	Intergenic	MTD|LTR|ERVL-MaLR	-94218	NM_177387	338362	Mm.41163	NM_177387	ENSMUSG00000047712	Ust	D930010O20Rik|UA2OST	uronyl-2-sulfotransferase	protein-coding	4.58	1.09
	chr2-52478	chr2	45900173	45900673	+	4.58	500	Intergenic	L1Md_F2|LINE|L1	203818	NR_040497	69405	Mm.396184	NR_040497	ENSMUSG00000086202	1700019E08Rik	-	RIKEN cDNA 1700019E08 gene	ncRNA	4.58	1.09
	chr7-37143	chr7	117297340	117297840	+	4.58	500	Intergenic	Intergenic	-83389	NM_175645	233781	Mm.461427	NM_175645	ENSMUSG00000030657	Xylt1	8030490L12	xylosyltransferase 1	protein-coding	4.58	1.09
	chr6-43507	chr6	90163027	90163527	+	4.58	500	Intergenic	L1_Mus1|LINE|L1	-15439	NM_053222	113849	Mm.435482	NM_053222	ENSMUSG00000060816	Vmn1r52	V1ra7|VN3	vomeronasal 1 receptor 52	protein-coding	4.58	0.91
	chr4-47267	chr4	136934413	136934913	+	4.58	500	intron (NM_007939, intron 8 of 16)	intron (NM_007939, intron 8 of 16)	22153	NM_007939	13842	Mm.1390	NM_007939	ENSMUSG00000028661	Epha8	AW047546|Eek|Hek3|mKIAA1459	Eph receptor A8	protein-coding	4.58	1.09
	chrX-7489	chrX	68320124	68320624	+	4.58	500	Intergenic	Intergenic	-310195	NR_030575	100124449		NR_030575	ENSMUSG00000106233	Mir509	Mirn509|mmu-mir-509	microRNA 509	ncRNA	4.58	0.91
	chr2-51965	chr2	24728305	24728805	+	4.58	500	intron (NM_001042528, intron 6 of 46)	ORR1D1-int|LTR|ERVL-MaLR	34597	NM_001042528	12287	Mm.4424	NM_007579	ENSMUSG00000004113	Cacna1b	AW050276|AW060892|AW822256|BIII|Cav2.2|Cchn1a|alpha(1B)	calcium channel, voltage-dependent, N type, alpha 1B subunit	protein-coding	4.58	0.73
	chr10-46916	chr10	114416557	114417057	+	4.58	500	intron (NM_146241, intron 15 of 18)	intron (NM_146241, intron 15 of 18)	384563	NM_146241	237553	Mm.445550	NM_146241	ENSMUSG00000050663	Trhde	9330155P21Rik	TRH-degrading enzyme	protein-coding	4.58	1.09
	chr9-23673	chr9	122594926	122595426	+	4.58	500	Intergenic	Intergenic	22675	NR_015610	319626	Mm.186748	NR_015610	ENSMUSG00000097736	9530059O14Rik	-	RIKEN cDNA 9530059O14 gene	ncRNA	4.58	0.73
	chr15-58265	chr15	16923032	16923532	+	4.58	500	Intergenic	Intergenic	194367	NM_009869	12565	Mm.439758	NM_009869	ENSMUSG00000025370	Cdh9	-	cadherin 9	protein-coding	4.58	0.73
	chr18-13307	chr18	51053833	51054333	+	4.58	500	Intergenic	Lx2|LINE|L1	-63815	NM_001081224	71373	Mm.63546	NM_001081224	ENSMUSG00000073565	Prr16	5430406M13Rik|AI607429	proline rich 16	protein-coding	4.58	1.09
	chr6-43294	chr6	82663836	82664336	+	4.58	500	Intergenic	ORR1B1|LTR|ERVL-MaLR	-11212	NM_001370295	66979	Mm.195753	NM_025882	ENSMUSG00000030042	Pole4	2400007P05Rik|5830430F06Rik	polymerase (DNA-directed), epsilon 4 (p12 subunit)	protein-coding	4.58	1.09
	chr12-21481	chr12	31069117	31069617	+	4.58	500	Intergenic	MERVL_2A-int|LTR|ERVL	-4601	NM_027828	104943	Mm.248938	NM_027828	ENSMUSG00000036136	Fam110c	9030611O19Rik|AU019489	family with sequence similarity 110, member C	protein-coding	4.58	0.91
	chr1-52669	chr1	25008614	25009114	+	4.58	500	Intergenic	Intergenic	269090	NM_001204913	100504323	Mm.484176	NM_001204913		Gm20172	-	predicted gene, 20172	protein-coding	4.58	1.09
	chr17-41721	chr17	19941499	19941999	+	4.58	500	Intergenic	Lx4A|LINE|L1	106456	NM_001104566	22313	Mm.379039	NM_001104566	ENSMUSG00000090315	Vmn2r104	V2r7	vomeronasal 2, receptor 104	protein-coding	4.58	0.91
	chr11-38376	chr11	62784673	62785173	+	4.4	500	exon (NM_001364097, exon 4 of 6)	exon (NM_001364097, exon 4 of 6)	4545	NM_138949	192651	Mm.168530	NM_138949	ENSMUSG00000047342	Zfp286	BC027023	zinc finger protein 286	protein-coding	4.4	0.73
	chr13-26010	chr13	109230194	109230694	+	4.4	500	intron (NM_011056, intron 3 of 16)	intron (NM_011056, intron 3 of 16)	-94300	NR_030644	100124489		NR_030644	ENSMUSG00000076946	Mir582	Mirn582|mir-582|mmu-mir-582	microRNA 582	ncRNA	4.4	0.73
	chr19-20851	chr19	52298580	52299080	+	4.4	500	Intergenic	Intergenic	34533	NM_008386	16333	Mm.46269	NM_008386	ENSMUSG00000035804	Ins1	Ins-1|Ins2-rs1	insulin I	protein-coding	4.4	1.09
	chr12-20702	chr12	91876660	91877160	+	4.4	500	Intergenic	RLTR10C|LTR|ERVK	-27753	NM_011344	20338	Mm.250605	NM_011344	ENSMUSG00000020964	Sel1l	AW493766|Sel1h|mKIAA4137	sel-1 suppressor of lin-12-like (C. elegans)	protein-coding	4.4	0.91
	chr5-40166	chr5	75478694	75479194	+	4.4	500	Intergenic	Intergenic	-96043	NM_001122733	16590	Mm.247073	NM_021099	ENSMUSG00000005672	Kit	Bs|CD117|Fdc|Gsfsco1|Gsfsco5|Gsfsow3|SCO1|SCO5|SOW3|Ssm|Tr-kit|W|c-KIT	KIT proto-oncogene receptor tyrosine kinase	protein-coding	4.4	1.09
	chr11-38569	chr11	70421753	70422253	+	4.4	500	Intergenic	Intergenic	-10577	NM_001271359	216869	Mm.203747	NM_145429	ENSMUSG00000060216	Arrb2	AI326910|AW122872|Arr3	arrestin, beta 2	protein-coding	4.4	0.73
	chr10-46503	chr10	99554518	99555018	+	4.4	500	Intergenic	Intergenic	-54403	NR_038019	100504202	Mm.403801	NR_038019	ENSMUSG00000111962	Gm20110	-	predicted gene, 20110	ncRNA	4.4	1.09
	chr3-44380	chr3	101261205	101261705	+	4.4	500	Intergenic	GA-rich|Low_complexity|Low_complexity	26484	NM_013486	12481	Mm.22842	NM_013486	ENSMUSG00000027863	Cd2	LFA-2|Ly-37|Ly37	CD2 antigen	protein-coding	4.4	1.09
	chr17-44284	chr17	76431486	76431986	+	4.4	500	Intergenic	Intergenic	570713	NR_033456	100043885	Mm.127562	NR_033456	ENSMUSG00000117539	Gm4710	-	predicted gene 4710	ncRNA	4.4	1.09
	chr4-55124	chr4	92817934	92818434	+	4.4	500	Intergenic	Lx4A|LINE|L1	517327	NM_026954	69136	Mm.171558	NM_026954	ENSMUSG00000054000	Tusc1	2200001D17Rik|TSG-9	tumor suppressor candidate 1	protein-coding	4.4	0.91
	chr9-23472	chr9	105737560	105738060	+	4.4	500	intron (NM_001102607, intron 22 of 36)	intron (NM_001102607, intron 22 of 36)	71838	NM_172927	245026	Mm.482507	NM_172927	ENSMUSG00000043719	Col6a6	E330019B14|E330026B02Rik	collagen, type VI, alpha 6	protein-coding	4.4	0.91
	chr19-20741	chr19	44476623	44477123	+	4.4	500	Intergenic	Intergenic	-16599	NM_011720	22423	Mm.88365	NM_011720	ENSMUSG00000036961	Wnt8b	-	wingless-type MMTV integration site family, member 8B	protein-coding	4.4	1.09
	chr2-50332	chr2	129370615	129371115	+	4.4	500	intron (NM_008361, intron 1 of 6)	(GA)n|Simple_repeat|Simple_repeat	274	NM_008361	16176	Mm.222830	NM_008361	ENSMUSG00000027398	Il1b	IL-1beta|Il-1b	interleukin 1 beta	protein-coding	4.4	1.09
	chr16-19920	chr16	38269129	38269629	+	4.4	500	intron (NM_001098404, intron 1 of 8)	intron (NM_001098404, intron 1 of 8)	25445	NM_001098404	18171	Mm.8509	NM_010936	ENSMUSG00000022809	Nr1i2	PXR|PXR.1|PXR.2|PXR1|SXR|mPXR	nuclear receptor subfamily 1, group I, member 2	protein-coding	4.4	1.09
	chr10-46067	chr10	92237677	92238177	+	4.4	500	intron (NR_046027, intron 7 of 8)	intron (NR_046027, intron 7 of 8)	-72749	NR_028262	110333	Mm.429764	NR_028262	ENSMUSG00000112117	Rmst	100041799|AI853140|C230053E11Rik|D930049J19Rik|Dmt2|Gm3515|M2|Ncrms	rhabdomyosarcoma 2 associated transcript (non-coding RNA)	ncRNA	4.4	1.09
	chr12-21124	chr12	7070607	7071107	+	4.4	500	Intergenic	Intergenic	309473	NR_045045	73575	Mm.179463	NR_045045	ENSMUSG00000102096	1700101O22Rik	-	RIKEN cDNA 1700101O22 gene	ncRNA	4.4	1.09
	chr2-54109	chr2	113904644	113905144	+	4.4	500	Intergenic	Intergenic	-56233	NM_181416	228482	Mm.45753	NM_181416	ENSMUSG00000041219	Arhgap11a	6530401L14Rik|mKIAA0013	Rho GTPase activating protein 11A	protein-coding	4.4	0.91
	chr11-35988	chr11	57083630	57084130	+	4.4	500	intron (NM_001252403, intron 2 of 15)	intron (NM_001252403, intron 2 of 15)	70834	NM_001252403	14799	Mm.4920	NM_008165	ENSMUSG00000020524	Gria1	2900051M01Rik|Glr-1|Glr1|GluA1|GluR-A|GluRA|Glur-1|Glur1|HIPA1|gluR-K1	glutamate receptor, ionotropic, AMPA1 (alpha 1)	protein-coding	4.4	1.09
	chr1-52197	chr1	3118911	3119411	+	4.22	500	Intergenic	Intergenic	552337	NM_001011874	497097	Mm.454496	NM_001011874	ENSMUSG00000051951	Xkr4	AY534250|Gm210|XRG4|mKIAA1889	X-linked Kx blood group related 4	protein-coding	4.22	0.91
	chr13-24897	chr13	34363439	34363939	+	4.22	500	Intergenic	Intergenic	-18507	NM_001033167	73102	Mm.23932	NM_001033167	ENSMUSG00000038267	Slc22a23	3110004L20Rik	solute carrier family 22, member 23	protein-coding	4.22	0.91
	chr13-24429	chr13	13229852	13230352	+	4.22	500	Intergenic	Lx8b|LINE|L1	47386	NM_181852	107849	Mm.392548	NM_181852	ENSMUSG00000055360	Prl2c5	Ghd3|MRP-4|Mrpplf4|PLF-4	prolactin family 2, subfamily c, member 5	protein-coding	4.22	0.91
