# Supplementary material for: CFDP1 regulates the stability of pericentric heterochromatin thereby affecting RAN GTPase activity and mitotic spindle formation
Source: PLoS Biol. 2024 Apr 17;22(4):e3002574. doi: 10.1371/journal.pbio.3002574 (PMC11023358; doi:10.1371/journal.pbio.3002574)
Supplement: S5 Data — (XLSX) [file pbio.3002574.s016.xlsx]

## Sheet: Figure 8A
File Name	admin_2018-02-28 15-14-46_CC011597.pcrd
Created By User	admin
Notes
ID
Run Started	02/28/2018 21:15:24 UTC
Run Ended	02/28/2018 22:21:23 UTC
Sample Vol	25
Lid Temp	105
Protocol File Name	ggProfile.prcl
Plate Setup File Name	Quick Plate_96 wells_SYBR Only.pltd
Base Serial Number	CC011597
Optical Head Serial Number	785BR4350
CFX Manager Version	3.1.1517.0823.
Well group	All Wells
Amplification step	3
Melt step	5
Well				Cq						avg	stdev
A01	maj sat I	con/con	h2az	10.4397		3.84427	-6.59541	0.0103415	1.03415	0.99932	0.0492534
A02				10.5403		3.84427	-6.69601	0.00964492	0.964492
A03			h2b	5.99276		3.84427	-2.14849	0.225549	22.5549	23.9897	2.02919
A04				5.81997		3.84427	-1.9757	0.254246	25.4246
A05			Rcc1	11.5522		3.84427	-7.70792	0.00478282	0.478282	0.464482	0.0195165
A06				11.6379		3.84427	-7.79368	0.00450681	0.450681
A07			beads	12.1014		3.84427	-8.25713	0.00326857	0.326857	0.322604	0.00601381
A08				12.1394		3.84427	-8.29516	0.00318352	0.318352
A09		Cp27/con	h2az	11.0345		3.85525	-7.17926	0.00689967	0.689967	0.696108	0.00868468
A10				11.009		3.85525	-7.1538	0.00702249	0.702249
A11			h2b	6.13481		3.85525	-2.27956	0.205961	20.5961	20.6435	0.0670178
A12				6.12818		3.85525	-2.27293	0.206909	20.6909
B01			Rcc1	11.812		3.85525	-7.9567	0.00402525	0.402525	0.416095	0.0191907
B02				11.7178		3.85525	-7.86257	0.00429665	0.429665
B03			beads	12.0865		3.85525	-8.2313	0.00332761	0.332761	0.342731	0.0140998
B04				12.0026		3.85525	-8.14734	0.00352701	0.352701
B05		Cp27/Anp32e	h2az	11.163		4.39145	-6.77152	0.00915311	0.915311	0.934008	0.0264426
B06				11.1052		4.39145	-6.71375	0.00952706	0.952706
B07			h2b	6.14419		4.39145	-1.75274	0.296737	29.6737	28.8558	1.15662
B08				6.226		4.39145	-1.83455	0.28038	28.038
B09			Rcc1	11.8487		4.39145	-7.45724	0.00569046	0.569046	0.548371	0.0292388
B10				11.9575		4.39145	-7.56608	0.00527696	0.527696
B11			beads	12.2478		4.39145	-7.8563	0.00431537	0.431537	0.438565	0.00993973
B12				12.2015		4.39145	-7.81006	0.00445594	0.445594
C01		Anp32e/con	h2az	10.8762		4.27882	-6.5974	0.0103272	1.03272	1.05537	0.0320207
C02				10.8143		4.27882	-6.53549	0.0107801	1.07801
C03			h2b	5.91826		4.27882	-1.63944	0.32098	32.098	29.7642	3.30057
C04				6.14498		4.27882	-1.86616	0.274303	27.4303
C05			Rcc1	11.648		4.27882	-7.36917	0.00604867	0.604867	0.561346	0.0615471
C06				11.8721		4.27882	-7.59332	0.00517826	0.517826
C07			beads	12.4907		4.27882	-8.21191	0.00337262	0.337262	0.333705	0.00503062
C08				12.5215		4.27882	-8.24267	0.00330148	0.330148
C09		h2az/con	h2az	11.5903		4.24048	-7.34983	0.00613027	0.613027	0.593689	0.0273492
C10				11.6843		4.24048	-7.44385	0.0057435	0.57435
C11			h2b	6.11107		4.24048	-1.87059	0.273462	27.3462	27.1775	0.238608
C12				6.12898		4.24048	-1.8885	0.270088	27.0088
D01			Rcc1	12.0028		4.24048	-7.76231	0.00460587	0.460587	0.496162	0.0503107
D02				11.7956		4.24048	-7.55507	0.00531737	0.531737
D03			beads	12.0305		4.24048	-7.79005	0.00451817	0.451817	0.474054	0.0314487
D04				11.8951		4.24048	-7.6546	0.00496292	0.496292
D05		input	con	3.90735	3.84427
D06				3.78119
D07			cp27/c	4.10988	3.85525
D08				3.60061
D09			cp27/anp32e	4.27504	4.39145
D10				4.50785
D11			anp32e/con	4.16268	4.27882
D12				4.39496
E01			h2az/con	4.29439	4.24048
E02				4.18658
E03	maj sat II	con/con	h2az	10.3888		4.20834	-6.18049	0.0137876	1.37876	1.31997	0.0831447
E04				10.5174		4.20834	-6.30909	0.0126118	1.26118
E05			h2b	5.60807		4.20834	-1.39973	0.379001	37.9001	35.707	3.10152
E06				5.78551		4.20834	-1.57717	0.335139	33.5139
E07			Rcc1	11.1583		4.20834	-6.94999	0.00808807	0.808807	0.734909	0.104508
E08				11.4495		4.20834	-7.24111	0.00661011	0.661011
E09			beads	11.7656		4.20834	-7.55728	0.00530923	0.530923	0.514675	0.0229776
E10				11.8567		4.20834	-7.6484	0.00498427	0.498427
E11		Cp27/con	h2az	10.8754		4.21563	-6.65974	0.00989049	0.989049	0.956356	0.0462343
E12				10.9741		4.21563	-6.75842	0.00923664	0.923664
F01			h2b	6.11875		4.21563	-1.90311	0.267366	26.7366	27.3992	0.937037
F02				6.04896		4.21563	-1.83332	0.280618	28.0618
F03			Rcc1	11.5866		4.21563	-7.37096	0.00604117	0.604117	0.64919	0.0637432
F04				11.3859		4.21563	-7.1703	0.00694264	0.694264
F05			beads	12.4447		4.21563	-8.22902	0.00333287	0.333287	0.439877	0.150741
F06				11.7313		4.21563	-7.51565	0.00546467	0.546467
F07		Cp27/Anp32e	h2az	10.9866		4.54065	-6.44593	0.0114705	1.14705	1.19647	0.0698889
F08				10.8673		4.54065	-6.32668	0.0124589	1.24589
F09			h2b	6.05637		4.54065	-1.51572	0.349721	34.9721	35.6478	0.955506
F10				6.00168		4.54065	-1.46103	0.363234	36.3234
F11			Rcc1	11.7349		4.54065	-7.19423	0.00682845	0.682845	0.653029	0.0421653
F12				11.8667		4.54065	-7.32606	0.00623214	0.623214
G01			beads	12.1171		4.54065	-7.57645	0.00523914	0.523914	0.523914	0
				12.1171		4.54065	-7.57645	0.00523914	0.523914
G02		Anp32e/con	h2az	10.7056		3.96068	-6.74489	0.00932362	0.932362	0.998363	0.0933391
G03				10.5145		3.96068	-6.55386	0.0106436	1.06436
G04			h2b	5.92545		3.96068	-1.96476	0.256181	25.6181	25.9346	0.447555
G05				5.89024		3.96068	-1.92955	0.26251	26.251
G06			Rcc1	11.6723		3.96068	-7.71164	0.00477052	0.477052	0.50395	0.0380389
G07				11.5182		3.96068	-7.55749	0.00530847	0.530847
G08			beads	12.3684		3.96068	-8.40775	0.00294452	0.294452	0.294452	0
				12.3684		3.96068	-8.40775	0.00294452	0.294452
G09		h2az/con	h2az	11.6363		4.12825	-7.50806	0.00549351	0.549351	0.564325	0.021176
G10				11.5597		4.12825	-7.43148	0.00579299	0.579299
G11			h2b	6.08993		4.12825	-1.96168	0.256729	25.6729	25.3324	0.481568
G12				6.12872		4.12825	-2.00047	0.249919	24.9919
H01			Rcc1	11.6325		4.12825	-7.50421	0.00550817	0.550817	0.54876	0.00291017
H02				11.6433		4.12825	-7.51503	0.00546702	0.546702
H03			beads	12		4.12825	-7.87175	0.0042694	0.42694	0.42694	0
H04				12		4.12825	-7.87175	0.0042694	0.42694
H05		input	con	4.17596	4.20834
H06				4.24072
H07			cp27/c	4.31158	4.21563
H08				4.11969
H09			cp27/anp32e	4.70583	4.54065
H10				4.37547
H11			anp32e/con	3.86448	3.96068
H12				4.05689
			h2az/con	4.00799	4.12825
				4.24851
				avg	stdev						avg	stdev
	maj sat I	con/con	h2az	0.99932	0.0492534			maj sat I	H2az	con/con	0.99932	0.0492534		RCC1	con/con	0.464482	0.0195165
			h2b	23.9897	2.02919					Cp27/con	0.696108	0.00868468			Cp27/con	0.416095	0.0191907
			Rcc1	0.464482	0.0195165					Cp27/Anp32e	0.934008	0.0264426			Cp27/Anp32e	0.548371	0.0292388
			beads	0.322604	0.00601381					Anp32e/con	1.05537	0.0320207			Anp32e/con	0.561346	0.0615471
										h2az/con	0.593689	0.0273492			h2az/con	0.496162	0.0503107
		Cp27/con	h2az	0.696108	0.00868468
			h2b	20.6435	0.0670178
			Rcc1	0.416095	0.0191907
			beads	0.342731	0.0140998
		Cp27/Anp32e	h2az	0.934008	0.0264426
			h2b	28.8558	1.15662
			Rcc1	0.548371	0.0292388
			beads	0.438565	0.00993973
		Anp32e/con	h2az	1.05537	0.0320207
			h2b	29.7642	3.30057
			Rcc1	0.561346	0.0615471
			beads	0.333705	0.00503062
		h2az/con	h2az	0.593689	0.0273492
			h2b	27.1775	0.238608
			Rcc1	0.496162	0.0503107
			beads	0.474054	0.0314487
	maj sat II	con/con	h2az	1.31997	0.0831447			maj sat II	H2az	con/con	1.31997	0.0831447		RCC1	con/con	0.734909	0.104508
			h2b	35.707	3.10152					Cp27/con	0.956356	0.0462343			Cp27/con	0.64919	0.0637432
			Rcc1	0.734909	0.104508					Cp27/Anp32e	1.19647	0.0698889			Cp27/Anp32e	0.653029	0.0421653
			beads	0.514675	0.0229776					Anp32e/con	0.998363	0.0933391			Anp32e/con	0.50395	0.0380389
										h2az/con	0.564325	0.021176			h2az/con	0.54876	0.00291017
		Cp27/con	h2az	0.956356	0.0462343
			h2b	27.3992	0.937037
			Rcc1	0.64919	0.0637432
			beads	0.439877	0.150741
		Cp27/Anp32e	h2az	1.19647	0.0698889
			h2b	35.6478	0.955506
			Rcc1	0.653029	0.0421653
			beads	0.523914	0
		Anp32e/con	h2az	0.998363	0.0933391
			h2b	25.9346	0.447555
			Rcc1	0.50395	0.0380389
			beads	0.294452	0
		h2az/con	h2az	0.564325	0.021176
			h2b	25.3324	0.481568
			Rcc1	0.54876	0.00291017
			beads	0.42694	0

## Sheet: Figure 8B
Notes
ID
Run Started	02/15/2018 02:21:02 UTC
Run Ended	02/15/2018 03:24:48 UTC
Sample Vol	20
Lid Temp	105
Protocol File Name	Protocol 082615.prcl
Plate Setup File Name	Quick Plate_96 wells_SYBR Only.pltd
Base Serial Number	CC011605
Optical Head Serial Number	785BR4368
CFX Manager Version	3.1.1517.0823.
Well group	All Wells
Amplification step	3
Melt step	5
Well				Cq						average	stdev					AVG	stdev
A01	maj sat I	con	h2az	12.9977		3.79083	-9.20686	0.00169223	0.169223	0.165762	0.00489552		0.0304545		0.0310905	0.0304545	0.000899429
A02				13.058		3.79083	-9.26712	0.001623	0.1623						0.0298185
A03			h2b	8.06074		3.79083	-4.26991	0.0518357	5.18357	5.44292	0.36678
A04				7.92315		3.79083	-4.13232	0.0570227	5.70227
A05			Rcc1	16.7676		3.79083	-12.9767	0.000124056	0.0124056	0.0116923	0.00100874		0.00214817		0.00227921	0.00214817	0.00018533
A06				16.9438		3.79083	-13.153	0.00010979	0.010979						0.00201712
A07			beads	18.716		3.79083	-14.9252	3.21425e-05	0.00321425	0.00306976	0.000204344
A08				18.8519		3.79083	-15.0611	2.92527e-05	0.00292527
A09		Cp27	h2az	13.3358		3.91504	-9.42072	0.00145908	0.145908	0.142719	0.00451021		0.0266195		0.0272143	0.0266195	0.00084123
A10				13.4002		3.91504	-9.48521	0.0013953	0.13953						0.0260247
A11			h2b	8.07483		3.91504	-4.15979	0.0559471	5.59471	5.36145	0.329878
A12				8.20045		3.91504	-4.28541	0.0512819	5.12819
B01			Rcc1	17.3307		3.91504	-13.4157	9.15108e-05	0.00915108	0.00915517	5.78237e-06		0.00170759		0.00170683	0.00170759	1.07851e-06
B02				17.3294		3.91504	-13.4144	9.15926e-05	0.00915926						0.00170835
B03			beads	18.9266		3.91504	-15.0115	3.0275e-05	0.0030275	0.00307851	7.21384e-05
B04				18.8787		3.91504	-14.9637	3.12952e-05	0.00312952
B05		Anp32e	h2az	12.7316		3.82248	-8.90911	0.00208013	0.208013	0.198511	0.013438		0.0397875		0.041692	0.0397875	0.00269338
B06				12.8698		3.82248	-9.04733	0.00189009	0.189009						0.037883
B07			h2b	8.06728		3.82248	-4.2448	0.052746	5.2746	4.98928	0.403493
B08				8.23246		3.82248	-4.40998	0.0470397	4.70397
B09			Rcc1	16.6034		3.82248	-12.781	0.000142085	0.0142085	0.0141655	6.08158e-05		0.00283919		0.00284781	0.00283919	1.21893e-05
B10				16.6122		3.82248	-12.7897	0.000141225	0.0141225						0.00283057
B11			beads	18.8354		3.82248	-15.0129	3.02456e-05	0.00302456	0.00288717	0.000194298
B12				18.9728		3.82248	-15.1503	2.74978e-05	0.00274978
C01		h2az	h2az	14.2414		4.11912	-10.1222	0.000897226	0.0897226	0.093	0.00463499		0.0139369		0.0134457	0.0139369	0.000694595
C02				14.1396		4.11912	-10.0205	0.000962775	0.0962775						0.014428
C03			h2b	8.03903		4.11912	-3.91991	0.0660678	6.60678	6.67295	0.0935754
C04				8.01042		4.11912	-3.8913	0.0673912	6.73912
C05			Rcc1	16.6637		4.11912	-12.5446	0.000167379	0.0167379	0.0167399	2.84124e-06		0.00250862		0.00250832	0.00250862	4.25785e-07
C06				16.6634		4.11912	-12.5442	0.000167419	0.0167419						0.00250892
C07			beads	19.0971		4.11912	-14.978	3.09873e-05	0.00309873	0.00298403	0.000162206
C08				19.208		4.11912	-15.0889	2.86933e-05	0.00286933
C09		Both	h2az	12.9192		4.20657	-8.71265	0.00238358	0.238358	0.247651	0.0131423		0.0354332		0.0341036	0.0354332	0.00188035
C10				12.8109		4.20657	-8.60433	0.00256944	0.256944						0.0367628
C11			h2b	8.03186		4.20657	-3.8253	0.0705456	7.05456	6.98925	0.092362
C12				8.05883		4.20657	-3.85226	0.0692394	6.92394
D01			Rcc1	16.9691		4.20657	-12.7626	0.000143908	0.0143908	0.01474	0.000493928		0.00210896		0.00205899	0.00210896	7.06696e-05
D02				16.9008		4.20657	-12.6942	0.000150893	0.0150893						0.00215893
D03			beads	19.1415		4.20657	-14.9349	3.19253e-05	0.00319253	0.00328906	0.000136514
D04				19.0568		4.20657	-14.8502	3.38559e-05	0.00338559
D05		input	con	3.86364	3.79083
D06				3.71803
D07			cp27	4.01047	3.91504
D08				3.81961
D09			anp32e	3.65809	3.82248
D10				3.98687
D11			h2az	3.98847	4.11912
D12				4.24978
E01			both	4.37611	4.20657
E02				4.03702												average	stdev
E03	maj sat II	con	h2az	12.6069		4.23234	-8.37461	0.00301295	0.301295	0.287442	0.0195914				0.0356921	0.034051	0.00232084
E04				12.7461		4.23234	-8.51378	0.00273589	0.273589						0.03241
E05			h2b	7.76515		4.23234	-3.53281	0.0864009	8.64009	8.4415	0.280849
E06				7.83304		4.23234	-3.6007	0.0824291	8.24291
E07			Rcc1	16.38		4.23234	-12.1476	0.000220396	0.0220396	0.0215006	0.000762276				0.00261087	0.00254701	9.0301e-05
E08				16.4523		4.23234	-12.22	0.000209616	0.0209616						0.00248316
E09			beads	18.3155		4.23234	-14.0831	5.76177e-05	0.00576177	0.00549115	0.000382714
E10				18.4578		4.23234	-14.2254	5.22053e-05	0.00522053
E11		Cp27	h2az	13.2544		4.54914	-8.70524	0.00239586	0.239586	0.22014	0.0275013				0.0284462	0.0261373	0.00326524
E12				13.5099		4.54914	-8.96079	0.00200694	0.200694						0.0238284
F01			h2b	8.13847		4.54914	-3.58932	0.0830819	8.30819	8.42245	0.161581
F02				8.09932		4.54914	-3.55018	0.085367	8.5367
F03			Rcc1	16.9806		4.54914	-12.4315	0.000181029	0.0181029	0.0193608	0.00177892				0.00214936	0.00229871	0.000211212
F04				16.7929		4.54914	-12.2438	0.000206187	0.0206187						0.00244806
F05			beads	18.8708		4.54914	-14.3217	4.88364e-05	0.00488364	0.00558787	0.000995926
F06				18.5052		4.54914	-13.9561	6.2921e-05	0.0062921
F07		Anp32e	h2az	12.7138		4.10585	-8.60792	0.00256305	0.256305	0.249782	0.00922521				0.0390894	0.0380945	0.00140695
F08				12.7891		4.10585	-8.68329	0.00243259	0.243259						0.0370997
F09			h2b	7.97318		4.10585	-3.86734	0.0685198	6.85198	6.5569	0.417311
F10				8.10312		4.10585	-3.99728	0.0626181	6.26181
F11			Rcc1	16.4222		4.10585	-12.3163	0.000196075	0.0196075	0.0190625	0.000770716				0.00299036	0.00290725	0.000117543
F12				16.5047		4.10585	-12.3988	0.000185175	0.0185175						0.00282413
G01			beads	18.7924		4.10585	-14.6865	3.79238e-05	0.00379238	0.00379238	0
				18.7924		4.10585	-14.6865	3.79238e-05	0.00379238
G02		h2az	h2az	14.1396		4.40581	-9.7338	0.00117445	0.117445	0.120671	0.00456213				0.0141076	0.0144951	0.000548007
G03				14.0625		4.40581	-9.65664	0.00123897	0.123897						0.0148826
G04			h2b	8.01323		4.40581	-3.60742	0.082046	8.2046	8.32494	0.170179
G05				7.97152		4.40581	-3.56571	0.0844527	8.44527
G06			Rcc1	16.7105		4.40581	-12.3047	0.000197665	0.0197665	0.0207469	0.00138645				0.00237437	0.00249213	0.000166542
G07				16.574		4.40581	-12.1682	0.000217272	0.0217272						0.0026099
G08			beads	19.1836		4.40581	-14.7778	3.55983e-05	0.00355983	0.00355983	0
				19.1836		4.40581	-14.7778	3.55983e-05	0.00355983
G09		Both	h2az	12.9788		4.44445	-8.53431	0.00269722	0.269722	0.280328	0.0149981				0.0338888	0.0352213	0.00188441
G10				12.8695		4.44445	-8.4251	0.00290933	0.290933						0.0365537
G11			h2b	8.01747		4.44445	-3.57303	0.0840257	8.40257	7.95905	0.627238
G12				8.17843		4.44445	-3.73398	0.0751552	7.51552
H01			Rcc1	17.0475		4.44445	-12.603	0.000160733	0.0160733	0.0163486	0.000389324				0.0020195	0.00205409	4.89159e-05
H02				16.9989		4.44445	-12.5545	0.000166239	0.0166239						0.00208868
H03			beads	19.2377		4.44445	-14.7932	3.52204e-05	0.00352204	0.00352204	0
				19.2377		4.44445	-14.7932	3.52204e-05	0.00352204
H04		input	con	4.27967	4.23234
H05				4.18502
H06			cp27	4.42729	4.54914
H07				4.671
H08			anp32e	4.03196	4.10585
H09				4.17973
H10			h2az	4.40581	4.40581
H11			both	4.32112	4.44445
H12				4.56777
				AVG	stdev
	maj sat I	H2az	con	0.0304545	0.000899429			RCC1	con	0.00214817	0.00018533
			Cp27	0.0266195	0.00084123				Cp27	0.0017689	8.778e-05
			Anp32e	0.0397875	0.00269338				Anp32e	0.00283919	1.21893e-05
			h2az	0.0139369	0.000694595				h2az	0.00250862	4.25785e-07
			Both	0.0354332	0.00188035				Both	0.00204001	0.000168168
																							for RCC1				*10	*10
																							con	0.00254701	9.0301e-05		0.0254701	0.00090301
																							Cp27	0.00170759	1.07851e-06		0.0170759	1.07851e-05
	maj sat II	H2az	con	0.034051	0.00232084			RCC1	con	0.00238629	0.000317596												Both	0.00210896	7.06696e-05		0.0210896	0.000706696
																							Anp32e	0.00283919	1.21893e-05		0.0283919	0.000121893
			Cp27	0.0261373	0.00326524				Cp27	0.00229871	0.000211212												h2az	0.00250862	4.25785e-07		0.0250862	4.25785e-06
			Anp32e	0.0380945	0.00140695				Anp32e	0.00290725	0.000117543
			h2az	0.0144951	0.000548007				h2az	0.00249213	0.000166542
			Both	0.0352213	0.00188441				Both	0.00205409	4.89159e-05

## Sheet: Figure 8I
MT aster count per cell in control, CFDP1 and control+CFDP1 siRNA treated cells
	con/con	cp27/con	cp27/anp32e			con/con	cp27/con	cp27/anp32e
	5	4	7			6	3	7
	11	7	8			10	6	6
	6	8	8			6	2	9
	8	7	8			8	3	7
	8	5	8			7	3	7
	9	4	6			8	4	8
	10	7	5			8	4	6
	9	3	5			8	4	6
	7	4	3			10	5	6
	8	5	9			9	4	9
	5	4	8			6	5	8
	9	5	8			10	4	8
	6	5	9			6	4	6
	8	4	9			8	7	4
	7	3	8			7	5	7
	6	5	9			8	5	7
	10	8	8			5	4	7
	9	4	6			8	3	8
	8	5	8			10	5	5
	6	4	7			9	4	6
	10	5	6			6	3	9
	8	4	5			8	5	7
	8	3	9			6	4	6
	7	5	8			8	6	7
	9	4	6			7	3	7
	10	5	4			8	2	7							1.75	1.75	2
	9	4	5			8	3	8							7	4	6
	8	5	6			8	4	6							1.25	0.25	1
	6	4	7			8	4	6							0.25	1	1
	9	3	6			9	4	6							1.75	2	1
	10	4	6			6	5	8
	10	4	8			6	4	8
	7	4	6			6	5	8
	9	5	6			8	4	6
	8	4	5			7	4	4
	9	6	6			8	6	7
	9	3	6			8	5	7
	10	3	8			10	5	7
	6	3	9			10	4	8
	6	4	9			9	3	5
	6	3	7				3	6
	8.02439	4.53659	6.95122				4	9
	1.58883	1.32472	1.54841				4
							5
					AVG	7.775	4.15909	6.88095
					STDEV	1.38652	1.08338	1.21
					P		0.001	0.001
					min	5	2	4
					first q	6.75	3.75	6
					median	8	4	7
					third q	8.25	5	8
					max	10	7	9
						1.75	1.75	2
						7	4	6
						1.25	0.25	1
						0.25	1	1
						1.75	2	1
