# Supplementary material for: CFDP1 regulates the stability of pericentric heterochromatin thereby affecting RAN GTPase activity and mitotic spindle formation
Source: PLoS Biol. 2024 Apr 17;22(4):e3002574. doi: 10.1371/journal.pbio.3002574 (PMC11023358; doi:10.1371/journal.pbio.3002574)
Supplement: S5 Table — (XLSX) [file pbio.3002574.s009.xlsx]

## Sheet: Sheet1
	S5 Table
	GENE ONTOLOGY FOR H2A.Z ENRICHED PEAKS IN CONTROL siRNA TREATED CELLS COMPARED TO CFDP1 siRNA TREATED CELLS
	P-value	Log P-value	Annotation	Ann Group	#features	Coverage(bp)	AvgFeatureSize[ref=506]	Overlap(#peaks)	Overlap(bp)	Expected Overlap(bp, gsize=2.00e+09)	Log Ratio Enrichment	Log P-value(+ underrepresented)	P-value
	2.98e-29	65.68	intergenic	basic	18319	1659160091	90570	584	293056	361496	-0.21	65.68	2.98e-29
	1.25e-28	64.25	introns	basic	375078	968114867	2581	263	130243	210931	-0.48	64.25	1.25e-28
	3.1e-23	51.83	LINE	repeats	989393	547436765	553	209	58672	119274	-0.71	51.83	3.1e-23
	2.6e-22	49.7	LINE|L1	repeats	905176	534542681	590	194	57542	116465	-0.71	49.7	2.6e-22
	1.28e-15	34.29	gaps	basic	686	78088274	113831	1	108	17013	-5.06	34.29	1.28e-15
	1.08e-11	25.25	centromeres	basic	20	57800000	2890000	0	0	12593	-9.44	25.25	1.08e-11
	6.13e-10	21.21	L1Md_T|LINE|L1	repeats	23688	48668239	2054	2	460	10603	-3.14	21.21	6.13e-10
	3.03e-09	19.62	L1Md_F2|LINE|L1	repeats	64898	74017535	1140	11	2779	16126	-1.76	19.62	3.03e-09
	6.93e-07	14.18	L1Md_A|LINE|L1	repeats	16844	32671406	1939	0	0	7118	-8.87	14.18	6.93e-07
