# Supplementary material for: CFDP1 regulates the stability of pericentric heterochromatin thereby affecting RAN GTPase activity and mitotic spindle formation
Source: PLoS Biol. 2024 Apr 17;22(4):e3002574. doi: 10.1371/journal.pbio.3002574 (PMC11023358; doi:10.1371/journal.pbio.3002574)
Supplement: S6 Data — (XLSX) [file pbio.3002574.s017.xlsx]

## Sheet: Figure 9B
		PCR for Wnt1Cre, CFDP1 and ANP32E expression in mouse tissues
			CT				avg	stdev	fold
A1	CFDP1 ex1	con	20.1243	15.3583	-4.76604	0.0367519	0.0348867	0.00263779	1	0.0756102
A2			20.2788	15.3583	-4.92045	0.0330215
A3		Def	20.2978	13.5313	-6.7665	0.00918504	0.00920022	2.14762e-05	0.263717	0.000615598
A4			20.2931	13.5313	-6.76174	0.00921541
A5		Res	20.0212	13.4886	-6.53262	0.0108015	0.0105861	0.000304668	0.303443	0.00873308
A6			20.0799	13.4886	-6.59135	0.0103707
A7	GAPDH	con	15.3851	15.3583
A8			15.3315
A9		Def	13.5307	13.5313
A10			13.532
A11		Res	13.5052	13.4886
A12			13.4719
			CT						fold	stdev
A1	Cre RT	con	30.7101	15.2497	-15.4604	2.21791e-05	1.89771e-05	4.52829e-06	1	0.238618
A2			31.2017	15.2497	-15.952	1.57751e-05
A3		Def	25.9708	13.3726	-12.5983	0.000161266	0.000159999	1.79172e-06	8.43116	0.0944146
A4			25.9937	13.3726	-12.6211	0.000158732
A5		Res	26.1133	13.4211	-12.6921	0.000151107	0.000137674	1.89966e-05	7.25475	1.00103
A6			26.3957	13.4211	-12.9746	0.000124242
A7	Anp32e	con	20.0223	15.2497	-4.77257	0.0365858	0.0350726	0.00214009	1	0.0610188
A8			20.1468	15.2497	-4.89714	0.0335593
A9		Def	18.7884	13.3726	-5.41581	0.023425	0.0237675	0.00048434	0.677666	0.0138097
A10			18.7468	13.3726	-5.37423	0.02411
A11		Res	Undetermined	13.4211	#VALUE!	#VALUE!	#VALUE!	#VALUE!	0	ND
A12			Undetermined	13.4211	#VALUE!	#VALUE!
B1	H2az	con	18.706	15.2497	-3.45634	0.0911041	0.0899029	0.00169871	1
B2			18.7446	15.2497	-3.49489	0.0887018
B3		Def	17.241	13.3726	-3.86849	0.0684651	0.0685023	5.25761e-05	0.761958
B4			17.2395	13.3726	-3.86692	0.0685395
B5		Res	17.6379	13.4211	-4.21682	0.0537789	0.0534554	0.000457544	0.59459
B6			17.6554	13.4211	-4.23428	0.0531319
B7	Pcna	con	18.9361	15.2497	-3.68638	0.0776762	0.077735	8.31348e-05	1
B8			18.9339	15.2497	-3.6842	0.0777938
B9		Def	17.8527	13.3726	-4.48009	0.0448082	0.0413357	0.00491085	0.531752
B10			18.0956	13.3726	-4.72306	0.0378633
B11		Res	17.9758	13.4211	-4.55463	0.0425519	0.0433421	0.00111749	0.557563
B12			17.9231	13.4211	-4.50202	0.0441323
C1	min SAT	con	15.4797	15.2497	-0.230026	0.85262	0.83648	0.0228248	1
C2			15.5354	15.2497	-0.285705	0.820341
C3		Def	16.2478	13.3726	-2.87524	0.13629	0.138642	0.00332598	0.165745
C4			16.1989	13.3726	-2.82629	0.140994
C5		Res	15.3701	13.4211	-1.949	0.258996	0.254203	0.00677861	0.303896
C6			15.4245	13.4211	-2.00341	0.24941
C7	Maj SAT	con	11.9494	15.2497	3.3003	9.8512	9.2209	0.891381	1
C8	not a good		12.1469	15.2497	3.10276	8.59059
C9	melt	Def	12.3006	13.3726	1.07194	2.10225	1.99245	0.155294	0.216079
C10	curve		12.4598	13.3726	0.912754	1.88264
C11		Res	12.339	13.4211	1.0821	2.11711	2.08353	0.0475003	0.225957
C12			12.3855	13.4211	1.03558	2.04994
D1	CCnb1	con	21.8704	15.2497	-6.62071	0.0101617	0.00997156	0.000268932	1
D2			21.9254	15.2497	-6.67574	0.00978139
D3		Def	20.7449	13.3726	-7.37235	0.00603534	0.00577695	0.000365412	0.579343
D4			20.8741	13.3726	-7.50149	0.00551857
D5		Res	21.2603	13.4211	-7.8392	0.00436682	0.00425117	0.000163561	0.426329
D6			21.3388	13.4211	-7.91772	0.00413551
D7	Actin	con	15.2131	15.2497
D8			15.2863
D9		Def	13.4562	13.3726
D10			13.2889
D11		Res	13.4209	13.4211
D12			13.4214
			fold	stdev	P
	Cre RT	con	1	0.238618
		Def	8.43116	0.0944146	0.0006
		Res	7.25475	1.00103	0.0133
	Anp32e	con	1	0.0610188
		Def	0.677666	0.0138097	0.0183
		Res	0	0
	CFDP1 ex1	con	1	0.0756102
		Def	0.263717	0.000615598	0.0052
		Res	0.303443	0.00873308	0.0059

## Sheet: Figure 9H I
	ChIP PCR for H2A.Z and RCC1 enrichment at minor and major satellite repeats in mouse tissues
					CT				avg	stdev
	A1	min SAT	H2az	con	9.00226	6.52947	-2.4728	0.180142	0.178853	0.0018227	con	0.178853	0.0018227
	A2				9.02306	6.52947	-2.49359	0.177564			Def	0.128249	0.0297284
	A3			Defect	9.22913	6.00788	-3.22125	0.107227	0.128249	0.0297284	Res1	0.194971	0.0299067
	A4				8.75188	6.00788	-2.74401	0.14927
	A5			Res1	9.07531	6.8652	-2.21011	0.216118	0.194971	0.0299067
	A6				9.38951	6.8652	-2.5243	0.173824
	A7
	A8
	A9		RCC1	con	8.80757	6.52947	-2.2781	0.206168	0.215764	0.01357	con	0.215764	0.01357
	A10				8.67917	6.52947	-2.1497	0.225359			Def	0.197658	0.0183578
	A11			Defect	8.4448	6.00788	-2.43693	0.184677	0.197658	0.0183578	Res1	0.280766	0.0503139
	A12				8.25504	6.00788	-2.24716	0.210639
	B1			Res1	8.89324	6.8652	-2.02804	0.245188	0.280766	0.0503139
	B2				8.52564	6.8652	-1.66044	0.316343
	B3
	B4
	B5		Input	con	6.50632	6.52947
	B6				6.55261
	B7			Defect	6.97403	7.00192
	B8				7.02982
	B9			Res1	6.91296	6.8652
	B10				6.81745
	B11			Res2	6.15385	6.00788																		P	P
	B12				5.86191														avg	stdev	H2az							RCC1
	C1	maj SAT I	H2az	con	4.10975						Calculation	maj SAT I	H2az	con	4.10975	8.95534	4.84559	0.0347802	0.0342389	0.000765484	con	0.347802	0.00765484					con	0.0331275	0.000175424
	C2				4.06413						using				4.06413	8.95534	4.89121	0.0336977			Def	0.270179	0.00497831	0.0068	Def/Res1			Def	0.0270968	0.000862204
	C3			Defect	4.45195						input			Defect	4.45195	9.6619	5.20994	0.0270179	0.0273699	0.000497831	Res1	0.41333	0.00217353	0.0073	0.0007			Res1	0.0597437	0.00100373
	C4				4.48907						from 1:100				4.48907	9.6619	5.17283	0.0277219
	C5			Res1	4.3763						dilution			Res1	4.3763	8.97286	4.59656	0.041333	0.0414867	0.000217353
	C6				4.38699						Ct values				4.38699	8.97286	4.58587	0.0416404
	C7			Res2	4.18361									Res2	4.18361	8.62414	4.44053	0.046054	0.0463295	0.000389567
	C8				4.20077										4.20077	8.62414	4.42337	0.0466049
	C9		RCC1	con	4.0449								RCC1	con	4.0449	8.95534	4.91043	0.0332516	0.0331275	0.000175424
	C10				4.0341										4.0341	8.95534	4.92124	0.0330035
	C11			Defect	4.48826									Defect	4.48826	9.6619	5.17363	0.0277065	0.0270968	0.000862204
	C12				4.42333										4.42333	9.6619	5.23856	0.0264871
	D1			Res1	4.89055									Res1	4.89055	8.97286	4.08231	0.059034	0.0597437	0.00100373
	D2				4.92483										4.92483	8.97286	4.04803	0.0604535
	D3			Res2	4.7263									Res2	4.7263	8.62414	3.89784	0.0670862	0.0688727	0.00252647
	D4				4.80116										4.80116	8.62414	3.82298	0.0706592
	D5		Input	con	Undetermined		No Ct
	D6				Undetermined		values																								P	P
	D7			Defect	Undetermined		because of														h2az							RCC1
	D8				Undetermined		high template				Calculation	maj SAT I	H2az	con	4.10975	12.364	8.2543	0.00327498	0.00322401	7.20795e-05	con	0.0322401	0.000720795					con	0.0311936	0.000165183
	D9			Res1	Undetermined		concentration				using				4.06413	12.364	8.29992	0.00317304			Def	0.0240984	0.000438326					Def	0.023858	0.000759146	0.0056	Def/Res1
	D10				Undetermined						input			Defect	4.45195	13.1675	8.71552	0.00237885	0.00240984	4.38326e-05	Res1	0.0351547	0.000184179					Res1	0.0506252	0.000850529	0.001	0.0009
	D11			Res2	Undetermined						from 1:1000				4.48907	13.1675	8.67841	0.00244083
	D12				Undetermined						dilution			Res1	4.3763	12.5337	8.15742	0.00350244	0.00351547	1.84179e-05
											Ct values				4.38699	12.5337	8.14673	0.00352849
														Res2	4.18361	12.1162	7.93255	0.00409322	0.00411771	3.46242e-05
															4.20077	12.1162	7.91539	0.00414219
		Ct values for maj SAT PCR using diluted input samples only											RCC1	con	4.0449	12.364	8.31914	0.00313104	0.00311936	1.65183e-05
					CT										4.0341	12.364	8.32995	0.00310768
		1 in 100	Input	con	9.00791	8.95534								Defect	4.48826	13.1675	8.67921	0.00243948	0.0023858	7.59146e-05
		Diluted			8.90277										4.42333	13.1675	8.74414	0.00233212
				Defect	9.67089	9.6619								Res1	4.89055	12.5337	7.64317	0.00500238	0.00506252	8.50529e-05
					9.65291										4.92483	12.5337	7.60889	0.00512266
				Res1	8.9738	8.97286								Res2	4.7263	12.1162	7.38986	0.00596254	0.00612132	0.000224549
					8.97192										4.80116	12.1162	7.315	0.0062801
				Res2	8.67217	8.62414
					8.57611
		1 in 1000	Input	con	12.3971	12.364
		diluted			12.331																h2az							RCC1
				Defect	13.1885	13.1675					Calculation	maj SAT I	H2az	con	5.68982	12.364	6.67423	0.00979164	0.00993196	0.000198451	con	0.0993196	0.00198451					con	0.00866615	2.61902e-05
					13.1464						usig				5.73058	12.364	6.63346	0.0100723			Def	0.0839823	0.000231135					Def	0.00835059	0.000163286
				Res1	12.5556	12.5337					first			Defect	6.26897	13.1675	6.89851	0.00838189	0.00839823	2.31135e-05	Res1	0.12147	0.00106769					Res1	0.00840364	3.18486e-05
					12.5118						set of				6.27458	13.1675	6.89289	0.00841457
				Res2	12.1003	12.1162					Ct values			Res1	6.16147	12.5337	6.37226	0.0120715	0.012147	0.000106769
					12.132										6.1794	12.5337	6.35432	0.0122224
														Res2	5.86152	12.1162	6.25464	0.0130969	0.0134719	0.000530438
															5.94188	12.1162	6.17428	0.013847
													RCC1	con	5.51057	12.364	6.85348	0.00864763	0.00866615	2.61902e-05
															5.51674	12.364	6.84731	0.00868467
														Defect	6.28338	13.1675	6.8841	0.00846605	0.00835059	0.000163286
															6.24348	13.1675	6.92399	0.00823513
														Res1	5.63508	12.5337	6.89864	0.00838112	0.00840364	3.18486e-05
															5.64281	12.5337	6.89091	0.00842616
														Res2	5.45511	12.1162	6.66104	0.00988158	0.0100754	0.0002741
															5.51063	12.1162	6.60553	0.0102692
