# Supplementary material for: CFDP1 regulates the stability of pericentric heterochromatin thereby affecting RAN GTPase activity and mitotic spindle formation
Source: PLoS Biol. 2024 Apr 17;22(4):e3002574. doi: 10.1371/journal.pbio.3002574 (PMC11023358; doi:10.1371/journal.pbio.3002574)
Supplement: S6 Table — (XLSX) [file pbio.3002574.s010.xlsx]

## Sheet: Sheet1
MS ANALYSIS OF 3X FLAG TAGGED CFDP1 INTERACTING PROTEINS IN NIH3T3 CELLS						SPECTRAL COUNTS		SPECTAL INDEX (MIC SIn)
Protein	Gene	Description	mw (Da)	Peptide Seqs	% Coverage	CFDP1 -ve	CFDP1 FL	CFDP1 -ve	CFDP1 FL
Q9JKF1	IQGA1	Ras GTPase-activating-like protein IQGAP1 OS=Mus musculus GN=Iqgap1 PE=1 SV=2	189111	90	65.7	6.86	55.7	3.683e-07	2.5e-06
Q8BGJ5	Q8BGJ5	MCG13402, isoform CRA_a OS=Mus musculus GN=Ptbp1 PE=1 SV=1	57000.5	25	61.2	7.6	37.01	4.927e-06	6.179e-06
P26039	TLN1	Talin-1 OS=Mus musculus GN=Tln1 PE=1 SV=2	272720	67	38.6	7.97	32.78	1.985e-07	5.312e-07
Q8R1A4-2	DOCK7	Isoform 2 of Dedicator of cytokinesis protein 7 OS=Mus musculus GN=Dock7	238818	66	39.6	15.91	33.91	5.486e-07	8.308e-07
Q9JIF7	COPB	Coatomer subunit beta OS=Mus musculus GN=Copb1 PE=1 SV=1	107268	47	58.1	4	40	2.33e-07	4.082e-06
Q6P4T2	U520	U5 small nuclear ribonucleoprotein 200 kDa helicase OS=Mus musculus GN=Snrnp200 PE=1 SV=1	245022	66	38.9	3	34	6.904e-08	8.588e-07
B2RQC6	PYR1	CAD protein OS=Mus musculus GN=Cad PE=1 SV=1	236748	57	38	3.75	39.03	4.974e-07	1.051e-06
E9PVA8	GCN1	eIF-2-alpha kinase activator GCN1 OS=Mus musculus GN=Gcn1 PE=1 SV=1	293598	67	31.6	4.91	49.13	1.205e-07	9.079e-07
Q6ZQK5	ACAP2	Arf-GAP with coiled-coil, ANK repeat and PH domain-containing protein 2 OS=Mus musculus GN=Acap2 PE=1 SV=2	88246.4	48	59.6	6	37.97	2.469e-07	2.213e-06
Q6P5D8	SMHD1	Structural maintenance of chromosomes flexible hinge domain-containing protein 1 OS=Mus musculus GN=Smchd1 PE=1 SV=2	226101	63	40		34		8.073e-07
Q01320	TOP2A	DNA topoisomerase 2-alpha OS=Mus musculus GN=Top2a PE=1 SV=2	173132	96	56.7	3	27	1.668e-08	1.534e-06
Q99PV0	PRP8	Pre-mRNA-processing-splicing factor 8 OS=Mus musculus GN=Prpf8 PE=1 SV=2	274127	65	35.8	2.99	35.89	2.725e-07	7.309e-07
Q64511	TOP2B	DNA topoisomerase 2-beta OS=Mus musculus GN=Top2b PE=1 SV=2	182263	68	46.7	3.5	35.97	1.824e-07	1.335e-06
P48678	LMNA	Prelamin-A/C OS=Mus musculus GN=Lmna PE=1 SV=2	74390.8	48	69.8	5.94	27.75	4.992e-07	3.982e-06
E9PVC5	E9PVC5	Eukaryotic translation initiation factor 4 gamma 1 OS=Mus musculus GN=Eif4g1 PE=1 SV=1	175818	50	38.8	5.74	30.81	2.286e-07	1.264e-06
Q9JIK5	DDX21	Nucleolar RNA helicase 2 OS=Mus musculus GN=Ddx21 PE=1 SV=3	93745.4	51	67.1	2.94	35.34	6.098e-08	2.513e-06
Q7TPV4	MBB1A	Myb-binding protein 1A OS=Mus musculus GN=Mybbp1a PE=1 SV=2	152338	53	47.5	6.96	36.82	3.995e-07	2.22e-06
Q7TSE6	ST38L	Serine/threonine-protein kinase 38-like OS=Mus musculus GN=Stk38l PE=1 SV=2	53863.3	37	72.2	8.97	23.97	2.971e-06	3.754e-06
P97310	MCM2	DNA replication licensing factor MCM2 OS=Mus musculus GN=Mcm2 PE=1 SV=3	103355	39	55.4	5	25.99	5.01e-07	1.823e-06
Q61881	MCM7	DNA replication licensing factor MCM7 OS=Mus musculus GN=Mcm7 PE=1 SV=1	81343.6	35	53.1	3.99	26.87	3.501e-07	2.828e-06
Q6P5D3	DHX57	Putative ATP-dependent RNA helicase DHX57 OS=Mus musculus GN=Dhx57 PE=1 SV=2	156078	50	43.1	6.93	28.73	1.857e-07	9.179e-07
Q9CU62	SMC1A	Structural maintenance of chromosomes protein 1A OS=Mus musculus GN=Smc1a PE=1 SV=4	143506	52	48.7	2	28.96	7.538e-08	1.183e-06
P46735-2	MYO1B	Isoform 2 of Unconventional myosin-Ib OS=Mus musculus GN=Myo1b	132295	40	41.2	8.93	25.77	5.115e-07	1.79e-06
O35286	DHX15	Pre-mRNA-splicing factor ATP-dependent RNA helicase DHX15 OS=Mus musculus GN=Dhx15 PE=1 SV=2	91183.3	37	51.8	3.56	20.6	1.369e-07	1.737e-06
Q08943-2	SSRP1	Isoform 2 of FACT complex subunit SSRP1 OS=Mus musculus GN=Ssrp1	81008.4	28	42.9	8	21	3.175e-06	1.646e-06
Q8VIG1	REST	RE1-silencing transcription factor OS=Mus musculus GN=Rest PE=1 SV=2	118034	40	56.6		28.94		1.723e-06
Q3U1J4	DDB1	DNA damage-binding protein 1 OS=Mus musculus GN=Ddb1 PE=1 SV=2	127096	41	45	5.98	20.93	6.992e-07	1.567e-06
Q04750	TOP1	DNA topoisomerase 1 OS=Mus musculus GN=Top1 PE=1 SV=2	91035	41	46.5	7	25.3	1.999e-07	2.43e-06
Q9QZE5	COPG1	Coatomer subunit gamma-1 OS=Mus musculus GN=Copg1 PE=1 SV=1	97702.5	31	44.6	2	30	2.001e-07	1.894e-06
Q6PGL7	WASC2	WASH complex subunit 2 OS=Mus musculus GN=Washc2 PE=1 SV=1	145620	38	48.8	2	17.75	3.288e-08	4.737e-07
Q8BG32	PSD11	26S proteasome non-ATPase regulatory subunit 11 OS=Mus musculus GN=Psmd11 PE=1 SV=3	47533.1	29	64.7	5.77	19.26	2.104e-06	5.345e-06
Q91VR5	DDX1	ATP-dependent RNA helicase DDX1 OS=Mus musculus GN=Ddx1 PE=1 SV=1	82663.9	29	46.8	3.96	21.81	4.432e-07	2.026e-06
Q6ZQ38	CAND1	Cullin-associated NEDD8-dissociated protein 1 OS=Mus musculus GN=Cand1 PE=1 SV=2	136605	35	33.6	4.99	32.95	4.891e-07	1.922e-06
P29341	PABP1	Polyadenylate-binding protein 1 OS=Mus musculus GN=Pabpc1 PE=1 SV=2	70805	32	63.7	3.63	19.44	2.718e-07	3.44e-06
P97311	MCM6	DNA replication licensing factor MCM6 OS=Mus musculus GN=Mcm6 PE=1 SV=1	93043.1	37	50.7		28.52		2.588e-06
Q61768	KINH	Kinesin-1 heavy chain OS=Mus musculus GN=Kif5b PE=1 SV=3	109772	34	49.1	5.98	19.91	1.29e-07	1.274e-06
Q8BK67	RCC2	Protein RCC2 OS=Mus musculus GN=Rcc2 PE=1 SV=1	56092.2	28	65.4	6	14	2.363e-06	1.974e-06
Q921M3	SF3B3	Splicing factor 3B subunit 3 OS=Mus musculus GN=Sf3b3 PE=1 SV=1	135825	39	42.4	8	20	2.249e-07	9.822e-07
Q3UEB3-2	PUF60	Isoform 2 of Poly(U)-binding-splicing factor PUF60 OS=Mus musculus GN=Puf60	54138.7	24	64.9	2	16.91	1.072e-06	2e-06
P25206	MCM3	DNA replication licensing factor MCM3 OS=Mus musculus GN=Mcm3 PE=1 SV=2	91755.3	29	48.6	2	16	1.314e-07	1.023e-06
P62334	PRS10	26S protease regulatory subunit 10B OS=Mus musculus GN=Psmc6 PE=1 SV=1	44253.2	21	66.6	2	25	1.162e-06	4.679e-06
P97855	G3BP1	Ras GTPase-activating protein-binding protein 1 OS=Mus musculus GN=G3bp1 PE=1 SV=1	51923	21	53.5	2.98	14.4	1.316e-06	2.669e-06
Q8VDP4	CCAR2	Cell cycle and apoptosis regulator protein 2 OS=Mus musculus GN=Ccar2 PE=1 SV=2	103209	25	44.3	3	18	1.895e-07	8.311e-07
Q9D6Z1	NOP56	Nucleolar protein 56 OS=Mus musculus GN=Nop56 PE=1 SV=2	64586.2	29	58.8	4.93	25.63	3.591e-07	3.993e-06
Q5BL09	Q5BL09	Npm1 protein OS=Mus musculus GN=Npm1 PE=2 SV=1	28438.7	28	73.9	6.91	16.69	2.727e-06	6.896e-06
D3Z0M9	D3Z0M9	DEAD (Asp-Glu-Ala-Asp) box polypeptide 23 OS=Mus musculus GN=Ddx23 PE=1 SV=1	95670.1	26	34.8	1	18	2.351e-07	1.273e-06
Q61191	HCFC1	Host cell factor 1 OS=Mus musculus GN=Hcfc1 PE=1 SV=2	210918	27	22.8		18.94		5.321e-07
Q9ESX5	DKC1	H/ACA ribonucleoprotein complex subunit 4 OS=Mus musculus GN=Dkc1 PE=1 SV=4	57509.4	19	42.4	3.98	20.82	2.18e-06	3.287e-06
O70194	EIF3D	Eukaryotic translation initiation factor 3 subunit D OS=Mus musculus GN=Eif3d PE=1 SV=2	64110.5	22	52.7	3	12	3.374e-07	2.062e-06
Q99JI4	PSMD6	26S proteasome non-ATPase regulatory subunit 6 OS=Mus musculus GN=Psmd6 PE=1 SV=1	45615.3	26	57.3	2	18	2.465e-07	2.858e-06
Q9WTM5	RUVB2	RuvB-like 2 OS=Mus musculus GN=Ruvbl2 PE=1 SV=3	51206.6	23	58.3	8.84	13.8	1.109e-06	2.41e-06
P28660	NCKP1	Nck-associated protein 1 OS=Mus musculus GN=Nckap1 PE=1 SV=2	129751	28	28.7		17		7.519e-07
Q99NB9	SF3B1	Splicing factor 3B subunit 1 OS=Mus musculus GN=Sf3b1 PE=1 SV=1	146116	28	33.8	1.99	18.92	1.524e-07	6.317e-07
Q9JLI8	SART3	Squamous cell carcinoma antigen recognized by T-cells 3 OS=Mus musculus GN=Sart3 PE=1 SV=1	109838	32	42.6	2	18	1.345e-07	8.658e-07
Q8VDV6	Q8VDV6	Tyms protein OS=Mus musculus GN=Tyms PE=2 SV=1	34997.7	15	54.7	1.97	12.83	1.251e-06	3.916e-06
Q5PSV9	MDC1	Mediator of DNA damage checkpoint protein 1 OS=Mus musculus GN=Mdc1 PE=1 SV=1	185191	32	32.3		16		3.777e-07
Q8C2E7	WASC5	WASH complex subunit 5 OS=Mus musculus GN=Washc5 PE=1 SV=2	134367	32	34.9	1	15.96	1.846e-07	8.257e-07
Q05D44	IF2P	Eukaryotic translation initiation factor 5B OS=Mus musculus GN=Eif5b PE=1 SV=2	137892	32	31.1	3	13.94	9.028e-08	6.766e-07
Q9Z2X1	HNRPF	Heterogeneous nuclear ribonucleoprotein F OS=Mus musculus GN=Hnrnpf PE=1 SV=3	45809	14	45.1	6.88	15.81	1.692e-06	1.936e-06
Q8C2Q3	RBM14	RNA-binding protein 14 OS=Mus musculus GN=Rbm14 PE=1 SV=1	69604.1	18	47.4		14.86		1.379e-06
Q8CIG8	ANM5	Protein arginine N-methyltransferase 5 OS=Mus musculus GN=Prmt5 PE=1 SV=3	72813.7	19	37.5	2.99	11.93	9.754e-07	1.721e-06
Q9D8E6	RL4	60S ribosomal protein L4 OS=Mus musculus GN=Rpl4 PE=1 SV=3	47232.1	24	50.6	2.99	25.96	1.501e-06	5.86e-06
Q9CX86	ROA0	Heterogeneous nuclear ribonucleoprotein A0 OS=Mus musculus GN=Hnrnpa0 PE=1 SV=1	30601.8	16	60	1	9	1.896e-07	3.022e-06
Q9WTK5	NFKB2	Nuclear factor NF-kappa-B p100 subunit OS=Mus musculus GN=Nfkb2 PE=1 SV=1	97021.1	20	30.4	1.98	16.83	3.908e-07	8.583e-07
Q76MZ3	2AAA	Serine/threonine-protein phosphatase 2A 65 kDa regulatory subunit A alpha isoform OS=Mus musculus GN=Ppp2r1a PE=1 SV=3	65443	17	39.7	1.98	15.81	2.898e-07	1.34e-06
Q02053	UBA1	Ubiquitin-like modifier-activating enzyme 1 OS=Mus musculus GN=Uba1 PE=1 SV=1	118040	20	27.6	1	17.99	1.388e-07	7.745e-07
Q52KC3	Q52KC3	DNA helicase OS=Mus musculus GN=Mcm5 PE=1 SV=1	82512.2	21	38.1	1.99	9.97	3.056e-07	7.966e-07
Q60972	RBBP4	Histone-binding protein RBBP4 OS=Mus musculus GN=Rbbp4 PE=1 SV=5	47752.1	16	57.2	7.96	11.84	2.093e-06	2.141e-06
Q8BMA6	SRP68	Signal recognition particle subunit SRP68 OS=Mus musculus GN=Srp68 PE=1 SV=2	70710.4	25	48.8	3.98	13.92	5.306e-07	9.281e-07
Q8CG48	SMC2	Structural maintenance of chromosomes protein 2 OS=Mus musculus GN=Smc2 PE=1 SV=2	134498	33	33.6	0.99	18.85	2.603e-08	8.781e-07
Q3TMX6	Q3TMX6	Farsb protein OS=Mus musculus GN=Farsb PE=2 SV=1	59875.5	22	50	0.97	12.69	1.019e-07	1.208e-06
Q8K310	MATR3	Matrin-3 OS=Mus musculus GN=Matr3 PE=1 SV=1	95471.3	23	38.4	1.98	14.78	2.09e-07	1.067e-06
Q9JIG7	CCD22	Coiled-coil domain-containing protein 22 OS=Mus musculus GN=Ccdc22 PE=1 SV=1	70979.9	21	42.4	1	13	2.304e-08	1.032e-06
O08528	HXK2	Hexokinase-2 OS=Mus musculus GN=Hk2 PE=1 SV=1	99402.2	24	31.5		15.37		7.568e-07
Q810A7	DDX42	ATP-dependent RNA helicase DDX42 OS=Mus musculus GN=Ddx42 PE=1 SV=3	102172	20	32.6	2	10.99	2.856e-07	6.189e-07
Q8BGC0	HTSF1	HIV Tat-specific factor 1 homolog OS=Mus musculus GN=Htatsf1 PE=1 SV=1	86403.7	23	37.4	3	12	2.973e-07	8.447e-07
P19324	SERPH	Serpin H1 OS=Mus musculus GN=Serpinh1 PE=1 SV=3	46608.2	16	44.8	0.98	9.85	6.27e-07	1.963e-06
Q9Z315	SNUT1	U4/U6.U5 tri-snRNP-associated protein 1 OS=Mus musculus GN=Sart1 PE=1 SV=1	91064.5	25	35		14		7.764e-07
P24547	IMDH2	Inosine-5'-monophosphate dehydrogenase 2 OS=Mus musculus GN=Impdh2 PE=1 SV=2	55923.9	22	46.5	0.99	12.87	1.151e-07	1.704e-06
Q62073	M3K7	Mitogen-activated protein kinase kinase kinase 7 OS=Mus musculus GN=Map3k7 PE=1 SV=1	67331.4	19	44.9	3	11.99	1.843e-07	8.359e-07
P25976	UBF1	Nucleolar transcription factor 1 OS=Mus musculus GN=Ubtf PE=1 SV=1	89639.3	22	29.6	3.99	15.88	2.14e-07	1.343e-06
Q6A0A9	F120A	Constitutive coactivator of PPAR-gamma-like protein 1 OS=Mus musculus GN=FAM120A PE=1 SV=2	121893	23	27.4	2	13.96	3.321e-08	7.241e-07
P40142	TKT	Transketolase OS=Mus musculus GN=Tkt PE=1 SV=1	67767.7	17	40.9	2	15	5.014e-07	1.426e-06
Q6A068	CDC5L	Cell division cycle 5-like protein OS=Mus musculus GN=Cdc5l PE=1 SV=2	92366.7	23	42.1		15.99		1.119e-06
B2RQQ5	B2RQQ5	Microtubule-associated protein 1B OS=Mus musculus GN=Map1b PE=2 SV=1	270879	31	23.8	1	7.97	7.442e-09	7.157e-08
Q8JZM7	CDC73	Parafibromin OS=Mus musculus GN=Cdc73 PE=1 SV=1	60683.2	20	43.3	2	13	1.293e-07	1.431e-06
P60122	RUVB1	RuvB-like 1 OS=Mus musculus GN=Ruvbl1 PE=1 SV=1	50308.4	17	56.4	8	12	2.849e-06	2.204e-06
P26516	PSMD7	26S proteasome non-ATPase regulatory subunit 7 OS=Mus musculus GN=Psmd7 PE=1 SV=2	36607.3	16	53.9	3	11	7.525e-07	2.667e-06
P70168	IMB1	Importin subunit beta-1 OS=Mus musculus GN=Kpnb1 PE=1 SV=2	97358.2	20	31.5	2	13	4.084e-07	1.33e-06
Q9DBR1-2	XRN2	Isoform 2 of 5'-3' exoribonuclease 2 OS=Mus musculus GN=Xrn2	108888	23	35	4	10	2.692e-07	4.32e-07
Q6A4J8-3	UBP7	Isoform 3 of Ubiquitin carboxyl-terminal hydrolase 7 OS=Mus musculus GN=Usp7	128717	27	33.6	2	9.98	6.087e-08	3.413e-07
Q9EQH3	VPS35	Vacuolar protein sorting-associated protein 35 OS=Mus musculus GN=Vps35 PE=1 SV=1	91889	21	32.2	0.98	12.83	4.156e-08	1.291e-06
Q6P5F9	XPO1	Exportin-1 OS=Mus musculus GN=Xpo1 PE=1 SV=1	123319	21	24.3		14.96		5.73e-07
Q9QZQ1-2	AFAD	Isoform 1 of Afadin OS=Mus musculus GN=Afdn	204939	31	27.3	0.99	12.87	1e-08	2.439e-07
Q9DCL9	PUR6	Multifunctional protein ADE2 OS=Mus musculus GN=Paics PE=1 SV=4	47102.1	19	48.2	1.99	9.96	2.666e-07	1.625e-06
Q6PDI5	ECM29	Proteasome-associated protein ECM29 homolog OS=Mus musculus GN=Ecm29 PE=1 SV=3	204113	26	19.8	0.99	16.81	7.033e-08	3.52e-07
D3YXK2	SAFB1	Scaffold attachment factor B1 OS=Mus musculus GN=Safb PE=1 SV=2	105523	25	36.9	1.5	8.5	4.362e-08	3.723e-07
Q9Z1N5	DX39B	Spliceosome RNA helicase Ddx39b OS=Mus musculus GN=Ddx39b PE=1 SV=1	49130	16	47.2	3.95	12.82	2.046e-06	2.084e-06
P39053-4	DYN1	Isoform 4 of Dynamin-1 OS=Mus musculus GN=Dnm1	97993.4	30	46.2	2	13.93	1.409e-07	8.651e-07
Q9D554	SF3A3	Splicing factor 3A subunit 3 OS=Mus musculus GN=Sf3a3 PE=1 SV=2	58949.3	16	36.5	2	13	1.224e-07	1.48e-06
Q921F4	HNRLL	Heterogeneous nuclear ribonucleoprotein L-like OS=Mus musculus GN=Hnrnpll PE=1 SV=3	64246.4	25	65	1	7.95	8.573e-08	4.838e-07
Q6ZPE2-2	MTMR5	Isoform 2 of Myotubularin-related protein 5 OS=Mus musculus GN=Sbf1	211853	30	25.1	2	11.95	3.109e-08	1.754e-07
Q99JX7	NXF1	Nuclear RNA export factor 1 OS=Mus musculus GN=Nxf1 PE=1 SV=3	70511.7	17	33.5	2.99	10.95	1.481e-07	9.882e-07
Q8CJG0	AGO2	Protein argonaute-2 OS=Mus musculus GN=Ago2 PE=1 SV=3	97494.1	28	47.4	0.98	9.92	2.952e-08	4.058e-07
Q7TSC1	PRC2A	Protein PRRC2A OS=Mus musculus GN=Prrc2a PE=1 SV=1	191523	21	17.9	2	14.98	1.918e-08	2.836e-07
Q9ESU6	BRD4	Bromodomain-containing protein 4 OS=Mus musculus GN=Brd4 PE=1 SV=2	156368	21	21.6	1	10.43	3.558e-09	2.535e-07
Q7TQH0-2	ATX2L	Isoform 2 of Ataxin-2-like protein OS=Mus musculus GN=Atxn2l	113280	23	34.1	0.98	17.69	1.919e-08	6.753e-07
Q80X50-2	UBP2L	Isoform 2 of Ubiquitin-associated protein 2-like OS=Mus musculus GN=Ubap2l	117053	16	28.2		14.97		4.907e-07
Q9QUM9	PSA6	Proteasome subunit alpha type-6 OS=Mus musculus GN=Psma6 PE=1 SV=1	27426.8	12	54.9	1	7	9.03e-08	1.7e-06
E9QAP7	E9QAP7	TATA-box-binding protein-associated factor 4 OS=Mus musculus GN=Taf4 PE=1 SV=1	105548	19	28.4	1	10.99	1.372e-08	4.242e-07
A0A0G2JGW9	A0A0G2JGW9	Far upstream element-binding protein 1 OS=Mus musculus GN=Fubp1 PE=1 SV=1	67581.6	23	46.2	1.96	13.69	1.079e-07	1.088e-06
Q91VM5	RMXL1	RNA binding motif protein, X-linked-like-1 OS=Mus musculus GN=Rbmxl1 PE=1 SV=1	42244.3	21	50		13.9		2.991e-06
Q3TWV4	Q3TWV4	AP-2 complex subunit mu OS=Mus musculus GN=Ap2m1 PE=1 SV=1	49484	16	43.6	1.97	7.85	1.773e-06	9.566e-07
E9Q586	E9Q586	Dynactin subunit 1 OS=Mus musculus GN=Dctn1 PE=1 SV=1	137088	26	36.9	1.98	8.9	2.183e-07	3.542e-07
Q61033	LAP2A	Lamina-associated polypeptide 2, isoforms alpha/zeta OS=Mus musculus GN=Tmpo PE=1 SV=4	75320.4	15	32.2	2	12.93	2.582e-07	7.209e-07
Q99K90	TAB2	TGF-beta-activated kinase 1 and MAP3K7-binding protein 2 OS=Mus musculus GN=Tab2 PE=1 SV=1	76592.8	14	30.4		11.94		8.314e-07
P46460	NSF	Vesicle-fusing ATPase OS=Mus musculus GN=Nsf PE=1 SV=2	82777.1	19	33.5		13		9.576e-07
Q8BMK4	CKAP4	Cytoskeleton-associated protein 4 OS=Mus musculus GN=Ckap4 PE=1 SV=2	63815.7	21	48		16		1.848e-06
B2RY56	RBM25	RNA-binding protein 25 OS=Mus musculus GN=Rbm25 PE=1 SV=2	99725.3	19	27.4	0.99	10.96	1.865e-08	6.022e-07
Q9Z2Q6	SEPT5	Septin-5 OS=Mus musculus GN=Sept5 PE=1 SV=2	42828.7	18	46.6	1.98	9.91	6.531e-07	2.052e-06
Q99K48	NONO	Non-POU domain-containing octamer-binding protein OS=Mus musculus GN=Nono PE=1 SV=3	54632.5	39	68.1	1.96	13.76	1.858e-06	1.774e-06
Q8C0C7	SYFA	Phenylalanine--tRNA ligase alpha subunit OS=Mus musculus GN=Farsa PE=1 SV=1	57706.8	15	36.4		12.76		1.076e-06
A1L366	A1L366	RAD21 homolog (S. pombe) OS=Mus musculus GN=Rad21 PE=2 SV=1	72158	18	45.8		8.83		6.459e-07
Q8BFZ3	ACTBL	Beta-actin-like protein 2 OS=Mus musculus GN=Actbl2 PE=1 SV=1	42085.1	26	66.5	2	5	2.617e-07	8.438e-07
Q9QXK3-4	COPG2	Isoform 4 of Coatomer subunit gamma-2 OS=Mus musculus GN=Copg2	97869.6	28	46.1		9.98		7.092e-07
Q922D8	C1TC	C-1-tetrahydrofolate synthase, cytoplasmic OS=Mus musculus GN=Mthfd1 PE=1 SV=4	101376	20	27.3	1	11.92	1.32e-07	5.216e-07
Q6NVF9	CPSF6	Cleavage and polyadenylation specificity factor subunit 6 OS=Mus musculus GN=Cpsf6 PE=1 SV=1	63536.9	13	23.2	3	9	1.278e-07	9.837e-07
Q99LI7	CSTF3	Cleavage stimulation factor subunit 3 OS=Mus musculus GN=Cstf3 PE=1 SV=1	83021.8	19	33.6	1	13.91	3.08e-08	9.806e-07
Q9R190	MTA2	Metastasis-associated protein MTA2 OS=Mus musculus GN=Mta2 PE=1 SV=1	75242.9	23	36.4	2	13	1.537e-07	1.061e-06
P70336	ROCK2	Rho-associated protein kinase 2 OS=Mus musculus GN=Rock2 PE=1 SV=1	160899	26	26.6		9.85		2.242e-07
Q8CGY8	OGT1	UDP-N-acetylglucosamine--peptide N-acetylglucosaminyltransferase 110 kDa subunit OS=Mus musculus GN=Ogt PE=1 SV=2	117183	24	31.5	0.5	4.5	1.937e-08	2.046e-07
Q62167	DDX3X	ATP-dependent RNA helicase DDX3X OS=Mus musculus GN=Ddx3x PE=1 SV=3	73254.1	42	64.3	2	6.5	1.497e-07	5.815e-07
Q60737	CSK21	Casein kinase II subunit alpha OS=Mus musculus GN=Csnk2a1 PE=1 SV=2	45258.9	13	44.5	1	7.94	1.091e-06	1.18e-06
Q7TMY8	HUWE1	E3 ubiquitin-protein ligase HUWE1 OS=Mus musculus GN=Huwe1 PE=1 SV=5	483740	32	10.6	0.99	10.87	5.862e-09	8.514e-08
Q920Q8	NS1BP	Influenza virus NS1A-binding protein homolog OS=Mus musculus GN=Ivns1abp PE=1 SV=2	71714.8	20	39.6	1.98	10.93	6.843e-08	7.277e-07
Q3UMF0-3	COBL1	Isoform 3 of Cordon-bleu protein-like 1 OS=Mus musculus GN=Cobll1	137675	22	26.5	1	10.97	2.516e-08	3.714e-07
Q8K4G5-4	ABLM1	Isoform 4 of Actin-binding LIM protein 1 OS=Mus musculus GN=Ablim1	77370.9	21	36.5	2.91	11.65	2.831e-07	7.645e-07
Q9WVA3	BUB3	Mitotic checkpoint protein BUB3 OS=Mus musculus GN=Bub3 PE=1 SV=2	36833.1	13	44.1	2	9.97	2.129e-07	1.854e-06
P62960	YBOX1	Nuclease-sensitive element-binding protein 1 OS=Mus musculus GN=Ybx1 PE=1 SV=3	35768.5	16	69.9	1.98	9.9	1.8e-07	2.197e-06
Q8CG47	SMC4	Structural maintenance of chromosomes protein 4 OS=Mus musculus GN=Smc4 PE=1 SV=1	147182	21	20.6		11.94		4.213e-07
Q3UBP6	Q3UBP6	Putative uncharacterized protein OS=Mus musculus GN=Actb PE=2 SV=1	41849.8	49	95.7	3	7	1.663e-06	6.909e-07
P27641	XRCC5	X-ray repair cross-complementing protein 5 OS=Mus musculus GN=Xrcc5 PE=1 SV=4	83220.1	15	26.8	3	9	2.822e-07	5.149e-07
P12382	PFKAL	ATP-dependent 6-phosphofructokinase, liver type OS=Mus musculus GN=Pfkl PE=1 SV=4	85521.5	21	40.8		6		6.419e-07
Q5SWU9-2	ACACA	Isoform 2 of Acetyl-CoA carboxylase 1 OS=Mus musculus GN=Acaca	265790	24	14.4		12.99		1.799e-07
P10630-2	IF4A2	Isoform 2 of Eukaryotic initiation factor 4A-II OS=Mus musculus GN=Eif4a2	41372.2	11	34.8	1.94	7.76	1.948e-06	1.666e-06
Q14B70-2	HDX	Isoform 2 of Highly divergent homeobox OS=Mus musculus GN=Hdx	77011.8	15	38	2	13	6.81e-08	8.738e-07
Q8CH18-3	CCAR1	Isoform 3 of Cell division cycle and apoptosis regulator protein 1 OS=Mus musculus GN=Ccar1	132321	18	18.3	3	9	4.159e-07	3.912e-07
Q3TLH4-5	PRC2C	Isoform 5 of Protein PRRC2C OS=Mus musculus GN=Prrc2c	303080	22	13.9		10.96		7.425e-08
Q3TW36	Q3TW36	Putative uncharacterized protein OS=Mus musculus GN=Skiv2l PE=2 SV=1	137781	21	25.2	0.98	5.92	2.166e-08	1.292e-07
Q3UMB9	WASC4	WASH complex subunit 4 OS=Mus musculus GN=Washc4 PE=1 SV=2	136625	20	21.3	2	7	9.704e-08	1.583e-07
Q99KJ8	DCTN2	Dynactin subunit 2 OS=Mus musculus GN=Dctn2 PE=1 SV=3	44197.8	19	61.9	2	9	8.329e-07	1.338e-06
Q60902-2	EP15R	Isoform 2 of Epidermal growth factor receptor substrate 15-like 1 OS=Mus musculus GN=Eps15l1	99517.7	19	31.3		11.99		5.955e-07
Q9WTX8	MD1L1	Mitotic spindle assembly checkpoint protein MAD1 OS=Mus musculus GN=Mad1l1 PE=1 SV=1	83687.7	20	36.7	2	13	7.346e-08	7.745e-07
Q9CZU3	SK2L2	Superkiller viralicidic activity 2-like 2 OS=Mus musculus GN=Skiv2l2 PE=1 SV=1	112838	18	22.2		6.93		3.067e-07
O08553	DPYL2	Dihydropyrimidinase-related protein 2 OS=Mus musculus GN=Dpysl2 PE=1 SV=2	62400.7	17	47		6.99		5.938e-07
Q8CGF7-2	TCRG1	Isoform 2 of Transcription elongation regulator 1 OS=Mus musculus GN=Tcerg1	124034	20	17.5		10.98		6.017e-07
O35295	PURB	Transcriptional activator protein Pur-beta OS=Mus musculus GN=Purb PE=1 SV=3	33970.8	12	64.2	1	8	5.254e-07	9.018e-07
Q3UKJ7	SMU1	WD40 repeat-containing protein SMU1 OS=Mus musculus GN=Smu1 PE=2 SV=2	57651.3	15	38.8	1	8	5.578e-08	8.45e-07
P54276	MSH6	DNA mismatch repair protein Msh6 OS=Mus musculus GN=Msh6 PE=1 SV=3	151286	21	21.1	1	10	1.872e-08	2.474e-07
Q810D6	GRWD1	Glutamate-rich WD repeat-containing protein 1 OS=Mus musculus GN=Grwd1 PE=1 SV=2	49201.9	14	46.2		5.94		4.993e-07
P52293	IMA1	Importin subunit alpha-1 OS=Mus musculus GN=Kpna2 PE=1 SV=2	58036.2	13	37.1		5.96		3.425e-07
P97496-2	SMRC1	Isoform 2 of SWI/SNF complex subunit SMARCC1 OS=Mus musculus GN=Smarcc1	123082	23	27.1		8.5		2.957e-07
Q6PDG5-2	SMRC2	Isoform 2 of SWI/SNF complex subunit SMARCC2 OS=Mus musculus GN=Smarcc2	124924	22	26.7	2	8.5	9.8e-08	3.07e-07
Q8CFE4	SCYL2	SCY1-like protein 2 OS=Mus musculus GN=Scyl2 PE=1 SV=1	103521	34	41.8		6		4.309e-07
Q3UVL4	VPS51	Vacuolar protein sorting-associated protein 51 homolog OS=Mus musculus GN=Vps51 PE=1 SV=2	86367.4	14	23.9	0.99	12.97	3.002e-08	5.569e-07
P47911	RL6	60S ribosomal protein L6 OS=Mus musculus GN=Rpl6 PE=1 SV=3	33561	13	40.5	3.96	14.85	1.231e-06	9.006e-06
Q9CWL8	CTBL1	Beta-catenin-like protein 1 OS=Mus musculus GN=Ctnnbl1 PE=1 SV=1	65129.2	14	32.5		9		6.486e-07
P58774-2	TPM2	Isoform 2 of Tropomyosin beta chain OS=Mus musculus GN=Tpm2	33009.7	59	87.7	1	5.98	2.373e-06	1.19e-06
Q8CGF4	Q8CGF4	Sec24 related gene family, member C (S. cerevisiae) OS=Mus musculus GN=Sec24c PE=2 SV=1	118844	17	20.7		8.99		2.8e-07
Q921V6	Q921V6	Trim21 protein OS=Mus musculus GN=Trim21 PE=2 SV=1	54237.9	15	33.6	0.99	4.95	5.981e-08	3.221e-07
E9Q634	MYO1E	Unconventional myosin-Ie OS=Mus musculus GN=Myo1e PE=1 SV=1	127062	20	20.4	1	8.99	1.299e-07	3.806e-07
O35593	PSDE	26S proteasome non-ATPase regulatory subunit 14 OS=Mus musculus GN=Psmd14 PE=1 SV=2	34614.6	9	46.8		9		3.004e-06
P51410	RL9	60S ribosomal protein L9 OS=Mus musculus GN=Rpl9 PE=2 SV=2	21921.8	10	65.6		2.96		1.126e-06
Q6PB44-2	PTN23	Isoform 2 of Tyrosine-protein phosphatase non-receptor type 23 OS=Mus musculus GN=Ptpn23	185605	19	16.5		8		1.739e-07
E0CYQ0	E0CYQ0	MCG13350, isoform CRA_b OS=Mus musculus GN=Kctd17 PE=1 SV=1	33393.5	19	69.9	3	11	9.3e-06	2.424e-06
P17918	PCNA	Proliferating cell nuclear antigen OS=Mus musculus GN=Pcna PE=1 SV=2	28898.4	12	67		7.94		1.749e-06
Q7TNV0	DEK	Protein DEK OS=Mus musculus GN=Dek PE=1 SV=1	43240.1	13	34.2	0.99	5.95	1.923e-07	1.06e-06
P99024	TBB5	Tubulin beta-5 chain OS=Mus musculus GN=Tubb5 PE=1 SV=1	49765	28	83.1	11	6	4.87e-06	6.977e-07
P23475	XRCC6	X-ray repair cross-complementing protein 6 OS=Mus musculus GN=Xrcc6 PE=1 SV=5	69622	17	41.4	1	7.98	9.94e-08	5.632e-07
Q7TT37	ELP1	Elongator complex protein 1 OS=Mus musculus GN=Ikbkap PE=1 SV=2	149885	14	15.2	1	10	4.63e-09	4.033e-07
Q8BHL5-2	ELMO2	Isoform 2 of Engulfment and cell motility protein 2 OS=Mus musculus GN=Elmo2	84049.1	15	31.1	0.99	8.9	1.021e-08	5.218e-07
Q80Y35	Q80Y35	Nuclear mitotic apparatus protein 1 OS=Mus musculus GN=Numa1 PE=2 SV=1	236128	29	20	2.97	15.83	8.802e-08	1.988e-07
P70698	PYRG1	CTP synthase 1 OS=Mus musculus GN=Ctps1 PE=1 SV=2	66802.2	15	29.3		8		5.655e-07
P43247	MSH2	DNA mismatch repair protein Msh2 OS=Mus musculus GN=Msh2 PE=1 SV=1	104404	17	27.3		9		4.014e-07
A2APB8	TPX2	Targeting protein for Xklp2 OS=Mus musculus GN=Tpx2 PE=1 SV=1	80239.6	13	24.9	1	8	3.308e-08	4.903e-07
Q3UHJ0	AAK1	AP2-associated protein kinase 1 OS=Mus musculus GN=Aak1 PE=1 SV=2	103553	12	23.7	1	8	1.813e-08	2.653e-07
Q9Z1T1	AP3B1	AP-3 complex subunit beta-1 OS=Mus musculus GN=Ap3b1 PE=1 SV=2	122988	16	18.2		10.92		5.374e-07
E9QMJ1	E9QMJ1	Arf-GAP with SH3 domain, ANK repeat and PH domain-containing protein 1 OS=Mus musculus GN=Asap1 PE=1 SV=1	124956	19	28.1		6.93		2.09e-07
Q61024	ASNS	Asparagine synthetase [glutamine-hydrolyzing] OS=Mus musculus GN=Asns PE=1 SV=3	64538.7	11	25.1	1	6.99	2.663e-07	5.608e-07
Q8R3S9	Q8R3S9	Ccdc93 protein (Fragment) OS=Mus musculus GN=Ccdc93 PE=2 SV=1	58555.4	19	43.1		7.93		7.454e-07
Q9DCN2-2	NB5R3	Isoform 2 of NADH-cytochrome b5 reductase 3 OS=Mus musculus GN=Cyb5r3	33700.7	10	45	1	7	1.686e-07	1.69e-06
Q9EPU0-2	RENT1	Isoform 2 of Regulator of nonsense transcripts 1 OS=Mus musculus GN=Upf1	124213	23	27.9		13		3.622e-07
Q9R1T4-2	2018-09-06	Isoform I of Septin-6 OS=Mus musculus GN=Sept6	48881.9	21	44.7		4.5		6.482e-07
Q61142	SPIN1	Spindlin-1 OS=Mus musculus GN=Spin1 PE=1 SV=2	29695.8	11	61.5	1.98	4.92	1.632e-06	1.546e-06
Q62203	SF3A2	Splicing factor 3A subunit 2 OS=Mus musculus GN=Sf3a2 PE=1 SV=2	51390.5	11	30.7	0.99	4.96	1.585e-07	7.817e-07
Q80X82	SYMPK	Symplekin OS=Mus musculus GN=Sympk PE=1 SV=1	142908	17	22		7.85		2.344e-07
P33174	KIF4	Chromosome-associated kinesin KIF4 OS=Mus musculus GN=Kif4 PE=1 SV=3	139793	20	22.3		14.5		4.691e-07
Q3U319	BRE1B	E3 ubiquitin-protein ligase BRE1B OS=Mus musculus GN=Rnf40 PE=1 SV=2	109559	16	26	1	10	3.471e-08	3.888e-07
E9Q555	RN213	E3 ubiquitin-protein ligase RNF213 OS=Mus musculus GN=Rnf213 PE=1 SV=2	585786	26	6.5	1	8	3.223e-09	4.844e-08
Q8BU30	SYIC	Isoleucine--tRNA ligase, cytoplasmic OS=Mus musculus GN=Iars PE=1 SV=2	144557	14	14.9	1.98	10.99	2.902e-08	4.333e-07
P28656	NP1L1	Nucleosome assembly protein 1-like 1 OS=Mus musculus GN=Nap1l1 PE=1 SV=2	44677.9	13	45.4		5.98		1.338e-06
Q3THS6	METK2	S-adenosylmethionine synthase isoform type-2 OS=Mus musculus GN=Mat2a PE=1 SV=2	43769.4	12	30.1		8.84		1.281e-06
Q9WVB4	SLIT3	Slit homolog 3 protein OS=Mus musculus GN=Slit3 PE=2 SV=2	168116	16	15.1	2	12	1.615e-07	4.353e-07
P42669	PURA	Transcriptional activator protein Pur-alpha OS=Mus musculus GN=Pura PE=1 SV=1	34952.4	12	59.8		5		9.914e-07
Q1HFZ0	NSUN2	tRNA (cytosine(34)-C(5))-methyltransferase OS=Mus musculus GN=Nsun2 PE=1 SV=2	81538.2	15	26.3		8		4.495e-07
Q5DTM8	BRE1A	E3 ubiquitin-protein ligase BRE1A OS=Mus musculus GN=Rnf20 PE=1 SV=2	113738	18	21.1	0.99	8.95	1.258e-07	3.275e-07
Q8CHH9-2	SEPT8	Isoform 2 of Septin-8 OS=Mus musculus GN=Sept8	50989.8	16	43.4		6.5		7.526e-07
Q924C1	XPO5	Exportin-5 OS=Mus musculus GN=Xpo5 PE=1 SV=1	137198	17	23		9		2.527e-07
Q64727	VINC	Vinculin OS=Mus musculus GN=Vcl PE=1 SV=4	116950	19	25.6	2	7	4.3e-08	2.179e-07
P12970	RL7A	60S ribosomal protein L7a OS=Mus musculus GN=Rpl7a PE=1 SV=2	30527.3	12	37.6	1.99	17.83	8.13e-07	5.847e-06
P50247	SAHH	Adenosylhomocysteinase OS=Mus musculus GN=Ahcy PE=1 SV=3	47881.3	13	34.3	1.98	5.94	3.658e-07	6.191e-07
O35638	STAG2	Cohesin subunit SA-2 OS=Mus musculus GN=Stag2 PE=1 SV=3	145991	19	20.3		6.97		2.087e-07
O88545	CSN6	COP9 signalosome complex subunit 6 OS=Mus musculus GN=Cops6 PE=1 SV=1	35947.1	9	44.4		5		1.497e-06
Q60596	XRCC1	DNA repair protein XRCC1 OS=Mus musculus GN=Xrcc1 PE=1 SV=2	69181.7	13	33.8	5	5	2.204e-07	4.939e-07
A2ATP5	A2ATP5	Myelin expression factor 2 OS=Mus musculus GN=Myef2 PE=1 SV=1	61227.3	14	34.9		6.88		6.246e-07
P54823	DDX6	Probable ATP-dependent RNA helicase DDX6 OS=Mus musculus GN=Ddx6 PE=1 SV=1	54301.3	9	30.6	1	6	3.785e-07	8.012e-07
P97371	PSME1	Proteasome activator complex subunit 1 OS=Mus musculus GN=Psme1 PE=1 SV=2	28727	11	46.6		6.92		9.808e-07
Q8VE37	RCC1	Regulator of chromosome condensation OS=Mus musculus GN=Rcc1 PE=1 SV=1	46471.5	12	52.5		3		6.457e-07
Q8BJY1	PSMD5	26S proteasome non-ATPase regulatory subunit 5 OS=Mus musculus GN=Psmd5 PE=1 SV=4	56081	13	32.1		6.99		9.419e-07
E9PZJ8	ASCC3	Activating signal cointegrator 1 complex subunit 3 OS=Mus musculus GN=Ascc3 PE=1 SV=1	251047	19	11.1		8		1.366e-07
Q8K363	DDX18	ATP-dependent RNA helicase DDX18 OS=Mus musculus GN=Ddx18 PE=1 SV=1	74314.4	15	29.2		11.98		7.669e-07
P12367	KAP2	cAMP-dependent protein kinase type II-alpha regulatory subunit OS=Mus musculus GN=Prkar2a PE=1 SV=2	45668.8	13	42.6	1	5	1.923e-07	9.205e-07
Q9ERU9	RBP2	E3 SUMO-protein ligase RanBP2 OS=Mus musculus GN=Ranbp2 PE=1 SV=2	341807	19	8.9	1	3	5.045e-09	3.493e-08
P46935	NEDD4	E3 ubiquitin-protein ligase NEDD4 OS=Mus musculus GN=Nedd4 PE=1 SV=3	102894	15	22.1	1.99	6.99	1.211e-07	2.319e-07
Q91VC3	IF4A3	Eukaryotic initiation factor 4A-III OS=Mus musculus GN=Eif4a3 PE=1 SV=3	46918.2	15	43.1	1	6.91	2.141e-07	9.892e-07
Q9Z1E4	GYS1	Glycogen [starch] synthase, muscle OS=Mus musculus GN=Gys1 PE=1 SV=2	76774	13	28.9	1	8	4.953e-07	7.386e-07
Q8CBW3-2	ABI1	Isoform 2 of Abl interactor 1 OS=Mus musculus GN=Abi1	48608.2	13	45.7	0.99	4.93	9.736e-08	6.945e-07
Q923T9-2	KCC2G	Isoform 2 of Calcium/calmodulin-dependent protein kinase type II subunit gamma OS=Mus musculus GN=Camk2g	59713.4	16	42.1	0.99	3.97	6.587e-08	5.49e-07
Q60715-2	P4HA1	Isoform 2 of Prolyl 4-hydroxylase subunit alpha-1 OS=Mus musculus GN=P4ha1	60991.8	13	30.1	1.98	6.94	5.304e-08	3.197e-07
P35601-2	RFC1	Isoform 2 of Replication factor C subunit 1 OS=Mus musculus GN=Rfc1	126310	12	13.6	0.99	10.95	6.113e-09	3.317e-07
Q6ZPT2	Q6ZPT2	MKIAA1352 protein (Fragment) OS=Mus musculus GN=Lars PE=2 SV=1	138047	18	21.7		9.94		3.501e-07
Q6NS46	RRP5	Protein RRP5 homolog OS=Mus musculus GN=Pdcd11 PE=1 SV=2	208207	21	16.5		14		2.494e-07
Q0VBL3	Q0VBL3	RNA binding motif protein 15 OS=Mus musculus GN=Rbm15 PE=1 SV=1	104434	15	19	1	10	2.948e-08	3.863e-07
P35979	RL12	60S ribosomal protein L12 OS=Mus musculus GN=Rpl12 PE=1 SV=2	17829.5	7	59.4		4.97		1.658e-06
P48962	ADT1	ADP/ATP translocase 1 OS=Mus musculus GN=Slc25a4 PE=1 SV=4	32955.2	2	13.1	1	14	7.259e-07	2.116e-06
B2RRE8	B2RRE8	CD2-associated protein OS=Mus musculus GN=Cd2ap PE=2 SV=1	70569	13	27.3		5		6.081e-07
Q60710	SAMH1	Deoxynucleoside triphosphate triphosphohydrolase SAMHD1 OS=Mus musculus GN=Samhd1 PE=1 SV=2	72784.3	16	31.7	0.97	6.85	7.863e-08	4.815e-07
Q6Y7W8	GGYF2	GRB10-interacting GYF protein 2 OS=Mus musculus GN=Gigyf2 PE=1 SV=2	148867	15	14.9	0.99	10.87	9.253e-09	2.636e-07
Q8R0F6	ILKAP	Integrin-linked kinase-associated serine/threonine phosphatase 2C OS=Mus musculus GN=Ilkap PE=1 SV=1	42855.8	12	39.5		6.94		1.226e-06
Q8BL97-2	SRSF7	Isoform 2 of Serine/arginine-rich splicing factor 7 OS=Mus musculus GN=Srsf7	27415	11	35.8		5		3.877e-06
Q6ZQ88	KDM1A	Lysine-specific histone demethylase 1A OS=Mus musculus GN=Kdm1a PE=1 SV=2	94852.5	13	27.3		3.98		1.019e-07
Q922K7	NOP2	Probable 28S rRNA (cytosine-C(5))-methyltransferase OS=Mus musculus GN=Nop2 PE=1 SV=1	87087.9	15	31.8		8		9.803e-07
Q3TDD9	PPR21	Protein phosphatase 1 regulatory subunit 21 OS=Mus musculus GN=Ppp1r21 PE=1 SV=2	88498.5	11	24		7		2.959e-07
Q571K4	TAB3	TGF-beta-activated kinase 1 and MAP3K7-binding protein 3 OS=Mus musculus GN=Tab3 PE=1 SV=2	79178.1	13	30.4	2	7	4.89e-08	5.419e-07
P05214	TBA3	Tubulin alpha-3 chain OS=Mus musculus GN=Tuba3a PE=1 SV=1	50053.7	19	58.7	0.99	20.09	9.015e-07	1.685e-06
P32233	DRG1	Developmentally-regulated GTP-binding protein 1 OS=Mus musculus GN=Drg1 PE=1 SV=1	40622.9	8	26.7		6		7.668e-07
P43276	H15	Histone H1.5 OS=Mus musculus GN=Hist1h1b PE=1 SV=2	22485.4	11	35.6	3	8	4.798e-07	4.307e-06
Q8BHN3-2	GANAB	Isoform 2 of Neutral alpha-glucosidase AB OS=Mus musculus GN=Ganab	109623	13	19.1	0.99	5.98	9.709e-09	3.175e-07
Q9D824-2	FIP1	Isoform 2 of Pre-mRNA 3'-end-processing factor FIP1 OS=Mus musculus GN=Fip1l1	65082.1	10	30.6	1	4.97	5.013e-08	3.94e-07
Q7M739	Q7M739	Nuclear pore complex-associated intranuclear coiled-coil protein TPR OS=Mus musculus GN=Tpr PE=1 SV=1	267466	16	9.8	2.96	6.9	4.868e-08	5.597e-08
F6ZBR8	F6ZBR8	Protein Wiz (Fragment) OS=Mus musculus GN=Wiz PE=1 SV=1	104797	12	18.9	0.99	10.91	1.749e-08	4.108e-07
Q8BMG7	RBGPR	Rab3 GTPase-activating protein non-catalytic subunit OS=Mus musculus GN=Rab3gap2 PE=1 SV=2	154956	14	10.7		10.97		3.031e-07
Q3TIX9	SNUT2	U4/U6.U5 tri-snRNP-associated protein 2 OS=Mus musculus GN=Usp39 PE=1 SV=2	65267.7	12	28.4		7		6.162e-07
Q9QZB7	ARP10	Actin-related protein 10 OS=Mus musculus GN=Actr10 PE=1 SV=2	46286.3	14	42.9	3	4	5.598e-07	2.387e-07
P15864	H12	Histone H1.2 OS=Mus musculus GN=Hist1h1c PE=1 SV=2	21307.8	15	50.5	3.5	4.5	1.287e-06	1.357e-06
P31266-2	SUH	Isoform 2 of Recombining binding protein suppressor of hairless OS=Mus musculus GN=Rbpj	54456.1	12	36.3		4		6.788e-07
Q9JKB3-2	YBOX3	Isoform 2 of Y-box-binding protein 3 OS=Mus musculus GN=Ybx3	30818.5	12	63	2.97	6.89	1.773e-07	9.02e-07
Q921F2	TADBP	TAR DNA-binding protein 43 OS=Mus musculus GN=Tardbp PE=1 SV=1	33702.8	8	39.9	0.98	4.9	8.123e-08	6.7e-07
Q9DAW6	PRP4	U4/U6 small nuclear ribonucleoprotein Prp4 OS=Mus musculus GN=Prpf4 PE=1 SV=1	58477.4	10	24.2		4.95		4.408e-07
D3YWX2	D3YWX2	YLP motif-containing protein 1 OS=Mus musculus GN=Ylpm1 PE=1 SV=2	241531	14	10		6.96		1.111e-07
Q61624	ZN148	Zinc finger protein 148 OS=Mus musculus GN=Znf148 PE=1 SV=2	88929.7	14	26.6		6.95		1.656e-07
Q6PAM1	TXLNA	Alpha-taxilin OS=Mus musculus GN=Txlna PE=1 SV=1	62492.6	12	22	1.98	4.97	8.755e-08	3.262e-07
O35841	API5	Apoptosis inhibitor 5 OS=Mus musculus GN=Api5 PE=1 SV=2	59154	13	28.6		4		3.476e-07
P45481	CBP	CREB-binding protein OS=Mus musculus GN=Crebbp PE=1 SV=3	266118	14	11		7.87		7.61e-08
P70388	RAD50	DNA repair protein RAD50 OS=Mus musculus GN=Rad50 PE=1 SV=1	153829	13	13	0.99	4.93	1.319e-08	2.428e-07
P28352	APEX1	DNA-(apurinic or apyrimidinic site) lyase OS=Mus musculus GN=Apex1 PE=1 SV=2	35558.2	9	42.3	0.99	3.96	1.721e-08	4.701e-07
P42567	EPS15	Epidermal growth factor receptor substrate 15 OS=Mus musculus GN=Eps15 PE=1 SV=1	98662.6	10	21.7		4.95		2.149e-07
Q3TMP1	Q3TMP1	General transcription factor IIIC, polypeptide 3 OS=Mus musculus GN=Gtf3c3 PE=1 SV=1	100809	14	22.4	1	7	2.025e-08	3.694e-07
P43277	H13	Histone H1.3 OS=Mus musculus GN=Hist1h1d PE=1 SV=2	22122.2	16	46.2	3.5	4.5	8.378e-07	5.744e-06
Q8BFY9-2	TNPO1	Isoform 2 of Transportin-1 OS=Mus musculus GN=Tnpo1	102543	12	17.3	1.97	7.89	2.916e-07	4.679e-07
Q9D662	SC23B	Protein transport protein Sec23B OS=Mus musculus GN=Sec23b PE=1 SV=1	86563.7	15	25.6	1	7.97	7.516e-09	3.013e-07
Q9ERF3	WDR61	WD repeat-containing protein 61 OS=Mus musculus GN=Wdr61 PE=1 SV=1	33841.8	8	36.1		3.96		7.308e-07
P14148	RL7	60S ribosomal protein L7 OS=Mus musculus GN=Rpl7 PE=1 SV=2	31471.8	13	37	2.97	10.88	7.657e-07	5.653e-06
P33610	PRI2	DNA primase large subunit OS=Mus musculus GN=Prim2 PE=1 SV=1	58555.8	11	29.9	3	6	1.719e-07	4.227e-07
Q3THK7	GUAA	GMP synthase [glutamine-hydrolyzing] OS=Mus musculus GN=Gmps PE=1 SV=2	76873	12	25.8	1	4	9.91e-08	2.224e-07
Q69ZN7	MYOF	Myoferlin OS=Mus musculus GN=Myof PE=1 SV=2	233790	16	10.5		11.94		2.322e-07
Q99MD9	NASP	Nuclear autoantigenic sperm protein OS=Mus musculus GN=Nasp PE=1 SV=2	84177.8	17	33.4	0.99	3.99	1.728e-08	2.727e-07
Q9CXG3	PPIL4	Peptidyl-prolyl cis-trans isomerase-like 4 OS=Mus musculus GN=Ppil4 PE=1 SV=2	53281.5	11	36.3		4.94		4.793e-07
B2RQG2	B2RQG2	PHD finger protein 3 OS=Mus musculus GN=Phf3 PE=1 SV=1	225997	14	13.5	0.99	7.98	6.826e-09	1.123e-07
E9Q3L2	PI4KA	Phosphatidylinositol 4-kinase alpha OS=Mus musculus GN=Pi4ka PE=1 SV=2	237519	18	11.4	1	7.98	4.835e-09	1.566e-07
Q922V4	PLRG1	Pleiotropic regulator 1 OS=Mus musculus GN=Plrg1 PE=1 SV=1	57046.1	8	28.5		5.95		2.746e-07
Q9Z1M8	RED	Protein Red OS=Mus musculus GN=Ik PE=1 SV=2	65710.8	11	25	1.99	6.93	6.512e-08	5.386e-07
Q99J62	RFC4	Replication factor C subunit 4 OS=Mus musculus GN=Rfc4 PE=1 SV=1	41000.6	9	25.5	1	7	2.048e-07	1.298e-06
Q3UK38	Q3UK38	rRNA adenine N(6)-methyltransferase OS=Mus musculus GN=Dimt1 PE=2 SV=1	35270.1	11	43.5		7		1.413e-06
O35326	SRSF5	Serine/arginine-rich splicing factor 5 OS=Mus musculus GN=Srsf5 PE=1 SV=2	31032.1	10	34.6		5		1.777e-06
Q9D0I9	SYRC	Arginine--tRNA ligase, cytoplasmic OS=Mus musculus GN=Rars PE=1 SV=2	75805.2	11	21.2	1	5	5.658e-08	3.772e-07
Q9DBC3	CMTR1	Cap-specific mRNA (nucleoside-2'-O-)-methyltransferase 1 OS=Mus musculus GN=Cmtr1 PE=1 SV=1	95849.2	15	21.7		6.98		2.916e-07
P33609	DPOLA	DNA polymerase alpha catalytic subunit OS=Mus musculus GN=Pola1 PE=1 SV=2	167665	15	14.9		5.96		2.123e-07
O88569	ROA2	Heterogeneous nuclear ribonucleoproteins A2/B1 OS=Mus musculus GN=Hnrnpa2b1 PE=1 SV=2	37469.8	33	89.5		4.96		7.438e-07
Q9Z2V5	HDAC6	Histone deacetylase 6 OS=Mus musculus GN=Hdac6 PE=1 SV=3	126376	10	11.3	1	5	1.564e-08	1.72e-07
P43274	H14	Histone H1.4 OS=Mus musculus GN=Hist1h1e PE=1 SV=2	22018	16	46.6	5	5	1.54e-06	6.232e-06
P0DOV2	IFI4	Interferon-activable protein 204 OS=Mus musculus GN=Ifi204 PE=1 SV=1	69574.4	17	42.2	1	3	2.396e-07	2.309e-07
Q9CZ04-2	CSN7A	Isoform 2 of COP9 signalosome complex subunit 7a OS=Mus musculus GN=Cops7a	30278	9	34.5	1	6.97	3.895e-08	1.144e-06
Q60875-4	ARHG2	Isoform 4 of Rho guanine nucleotide exchange factor 2 OS=Mus musculus GN=Arhgef2	112037	13	20.2		3.97		1.375e-07
Q8BWW4	LARP4	La-related protein 4 OS=Mus musculus GN=Larp4 PE=1 SV=2	73570.6	11	24.1		6		2.009e-07
P26645	MARCS	Myristoylated alanine-rich C-kinase substrate OS=Mus musculus GN=Marcks PE=1 SV=2	29793.9	6	42.7	7	4	4.694e-07	2.464e-07
Q5RJG1	NOL10	Nucleolar protein 10 OS=Mus musculus GN=Nol10 PE=2 SV=1	80239.4	11	20.7		8		3.692e-07
Q9D0M1	KPRA	Phosphoribosyl pyrophosphate synthase-associated protein 1 OS=Mus musculus GN=Prpsap1 PE=1 SV=1	42548.5	10	41.3		1.98		5.468e-07
Q8CI71	VPS50	Syndetin OS=Mus musculus GN=Vps50 PE=1 SV=2	111392	12	18.2		4.98		2.43e-07
Q8BWQ6	CP062	UPF0505 protein C16orf62 homolog OS=Mus musculus PE=1 SV=2	112194	13	19.1		3.96		3.144e-07
Q9QYC0	ADDA	Alpha-adducin OS=Mus musculus GN=Add1 PE=1 SV=2	80789.4	9	19.7	0.99	4.93	5.69e-08	3.278e-07
P61164	ACTZ	Alpha-centractin OS=Mus musculus GN=Actr1a PE=1 SV=1	42695	13	42.6	1	5	8.856e-08	5.013e-07
Q99NH0	ANR17	Ankyrin repeat domain-containing protein 17 OS=Mus musculus GN=Ankrd17 PE=1 SV=2	247174	17	11		5.98		7.051e-08
Q9CWJ9	PUR9	Bifunctional purine biosynthesis protein PURH OS=Mus musculus GN=Atic PE=1 SV=2	64339.2	10	24.5		7		4.073e-07
Q9EST5-2	AN32B	Isoform 2 of Acidic leucine-rich nuclear phosphoprotein 32 family member B OS=Mus musculus GN=Anp32b	28340	7	23.4	0.5	4.5	6.017e-08	1.019e-06
P27612	PLAP	Phospholipase A-2-activating protein OS=Mus musculus GN=Plaa PE=1 SV=4	87399.7	16	24.6	1	8	3.086e-08	3.672e-07
Q9JKX4	AATF	Protein AATF OS=Mus musculus GN=Aatf PE=1 SV=1	59590.1	13	38.4		4.95		3.336e-07
Q3TL33	Q3TL33	Putative uncharacterized protein OS=Mus musculus GN=Calu PE=2 SV=1	37184.4	8	36.2	0.98	2.92	2.433e-07	7.223e-07
Q8K224	NAT10	RNA cytidine acetyltransferase OS=Mus musculus GN=Nat10 PE=1 SV=1	115652	14	16.6		8		2.621e-07
Q91ZW3	SMCA5	SWI/SNF-related matrix-associated actin-dependent regulator of chromatin subfamily A member 5 OS=Mus musculus GN=Smarca5 PE=1 SV=1	121856	14	12.4		7		2.721e-07
A0A1L1SQ51	A0A1L1SQ51	Talin-2 OS=Mus musculus GN=Tln2 PE=1 SV=1	272513	25	12.8	1.98	5.87	6.757e-09	6.491e-08
Q6PIU9	YJ005	Uncharacterized protein FLJ45252 homolog OS=Mus musculus PE=1 SV=2	37771.4	10	55.9		6		7.4e-07
O88532	ZFR	Zinc finger RNA-binding protein OS=Mus musculus GN=Zfr PE=1 SV=2	114689	16	28.3		4.98		1.073e-07
P63038	CH60	60 kDa heat shock protein, mitochondrial OS=Mus musculus GN=Hspd1 PE=1 SV=1	61079.5	9	22.2	1	4.98	1.179e-07	4.857e-07
A2API8	A2API8	A-kinase anchor protein 2 OS=Mus musculus GN=Akap2 PE=1 SV=1	101806	42	78.9	1.56	2.03	4.168e-07	5.551e-08
Q9CQF3	CPSF5	Cleavage and polyadenylation specificity factor subunit 5 OS=Mus musculus GN=Nudt21 PE=1 SV=1	26277.8	9	37.4		2.06		5.534e-07
Q9WTX6	CUL1	Cullin-1 OS=Mus musculus GN=Cul1 PE=1 SV=1	89837.1	13	22.2		4.99		2.319e-07
Q9JLV5	CUL3	Cullin-3 OS=Mus musculus GN=Cul3 PE=1 SV=1	91452.8	12	21.9		7.99		3.349e-07
P24788	CD11B	Cyclin-dependent kinase 11B OS=Mus musculus GN=Cdk11b PE=1 SV=2	91691.7	12	17.6		6		2.218e-07
P08775	RPB1	DNA-directed RNA polymerase II subunit RPB1 OS=Mus musculus GN=Polr2a PE=1 SV=3	217201	15	14.9		5		5.02e-08
P52432	RPAC1	DNA-directed RNA polymerases I and III subunit RPAC1 OS=Mus musculus GN=Polr1c PE=1 SV=3	39172	7	23.1	0.98	5.92	5.614e-07	9.909e-07
Q8BJW6	EIF2A	Eukaryotic translation initiation factor 2A OS=Mus musculus GN=Eif2a PE=1 SV=2	64524.9	10	24.8	1	4.97	5.384e-08	1.766e-07
Q8R550-3	SH3K1	Isoform 3 of SH3 domain-containing kinase-binding protein 1 OS=Mus musculus GN=Sh3kbp1	68957.6	25	55.1	0.5	2.5	4.204e-08	2.212e-07
Q6ZQ58	LARP1	La-related protein 1 OS=Mus musculus GN=Larp1 PE=1 SV=3	121383	9	14	1	7	1.28e-07	2.059e-07
Q3TJD7	PDLI7	PDZ and LIM domain protein 7 OS=Mus musculus GN=Pdlim7 PE=1 SV=1	50212.8	13	42.5	1	5.95	2.5e-08	5.131e-07
Q9CT10	RANB3	Ran-binding protein 3 OS=Mus musculus GN=Ranbp3 PE=1 SV=2	52684.8	9	31.8	3	3	4.692e-08	1.723e-07
Q6DFV3	RHG21	Rho GTPase-activating protein 21 OS=Mus musculus GN=Arhgap21 PE=1 SV=1	217425	16	13.2	1.99	10.98	1.907e-08	1.029e-07
O88796	RPP30	Ribonuclease P protein subunit p30 OS=Mus musculus GN=Rpp30 PE=1 SV=1	27667.9	6	32	1	5.98	6.664e-07	4.885e-07
Q6A026	PDS5A	Sister chromatid cohesion protein PDS5 homolog A OS=Mus musculus GN=Pds5a PE=1 SV=3	150523	11	12.3		8		1.978e-07
P56399	UBP5	Ubiquitin carboxyl-terminal hydrolase 5 OS=Mus musculus GN=Usp5 PE=1 SV=1	93529.5	10	18.3	1	5.98	2.485e-08	3.24e-07
Q8VDD8	WASH1	WASH complex subunit 1 OS=Mus musculus GN=Washc1 PE=1 SV=1	51752.7	11	28.2		5		4.95e-07
Q8BI72	CARF	CDKN2A-interacting protein OS=Mus musculus GN=Cdkn2aip PE=1 SV=1	59870.3	12	32.9	1	5	1.592e-08	3.171e-07
Q99LC2	CSTF1	Cleavage stimulation factor subunit 1 OS=Mus musculus GN=Cstf1 PE=1 SV=1	48476.8	9	28.8		6		6.435e-07
O88271	CFDP1	Craniofacial development protein 1 OS=Mus musculus GN=Cfdp1 PE=1 SV=1	32973.5	9	32.9		10		6.284e-06
P13864	DNMT1	DNA (cytosine-5)-methyltransferase 1 OS=Mus musculus GN=Dnmt1 PE=1 SV=5	184385	18	15.3		2.99		8.715e-08
B9EKL9	B9EKL9	Eml1 protein OS=Mus musculus GN=Eml1 PE=2 SV=1	88230	10	15.2		5.95		2.845e-07
D3Z158	D3Z158	Glutaminyl-tRNA synthetase OS=Mus musculus GN=Qars PE=1 SV=2	87890.1	11	23.2	0.99	3.96	2.19e-08	1.382e-07
Q9Z130	HNRDL	Heterogeneous nuclear ribonucleoprotein D-like OS=Mus musculus GN=Hnrnpdl PE=1 SV=1	33628.1	15	42.2	1	4	2.044e-08	6.949e-07
Q8R081	HNRPL	Heterogeneous nuclear ribonucleoprotein L OS=Mus musculus GN=Hnrnpl PE=1 SV=2	64085.3	31	68.3		1.5		2.593e-07
Q3B7C1	Q3B7C1	Hp1bp3 protein (Fragment) OS=Mus musculus GN=Hp1bp3 PE=2 SV=1	27261.4	10	54.7		9.81		4.521e-06
O35344	IMA4	Importin subunit alpha-4 OS=Mus musculus GN=Kpna3 PE=1 SV=1	57880.9	10	22.5		5		3.182e-07
Q8BUR4-2	DOCK1	Isoform 2 of Dedicator of cytokinesis protein 1 OS=Mus musculus GN=Dock1	215507	10	9.5		7		1.352e-07
P39054-2	DYN2	Isoform 2 of Dynamin-2 OS=Mus musculus GN=Dnm2	97386.7	22	33.1	0.99	4.94	7.382e-08	1.148e-07
Q9Z0R4-2	ITSN1	Isoform 2 of Intersectin-1 OS=Mus musculus GN=Itsn1	129834	12	11.5	0.99	6.91	7.03e-08	1.288e-07
Q9QZ05-3	E2AK4	Isoform 3 of eIF-2-alpha kinase GCN2 OS=Mus musculus GN=Eif2ak4	178261	15	13.1		3.96		1.215e-07
Q62018-3	CTR9	Isoform 3 of RNA polymerase-associated protein CTR9 homolog OS=Mus musculus GN=Ctr9	108265	12	14.5		7		1.818e-07
P70257-1	NFIX	Isoform NFIX1 of Nuclear factor 1 X-type OS=Mus musculus GN=Nfix	44717.4	9	38.8	1.98	3.97	1.565e-07	2.418e-07
Q8VEL2	MTMRE	Myotubularin-related protein 14 OS=Mus musculus GN=Mtmr14 PE=1 SV=2	72577.1	9	16.8		5.92		4.215e-07
E9PVX6	KI67	Proliferation marker protein Ki-67 OS=Mus musculus GN=Mki67 PE=1 SV=1	351587	17	10.5		11		7.667e-08
Q9WVE8	PACN2	Protein kinase C and casein kinase substrate in neurons protein 2 OS=Mus musculus GN=Pacsin2 PE=1 SV=1	55942.3	12	25.3	1	7	8.753e-08	6.606e-07
Q9EQU5	SET	Protein SET OS=Mus musculus GN=Set PE=1 SV=1	33391.7	8	39.5	0.99	5.94	8.884e-08	3.149e-06
P28301	LYOX	Protein-lysine 6-oxidase OS=Mus musculus GN=Lox PE=1 SV=1	46779.5	9	28.2		5.94		6.735e-07
Q9D0F6	RFC5	Replication factor C subunit 5 OS=Mus musculus GN=Rfc5 PE=1 SV=1	38162	9	38.3		4		6.32e-07
Q3U561	Q3U561	Ribosomal protein OS=Mus musculus GN=Rpl10a PE=2 SV=1	24869.6	9	41.5	0.99	5.96	1.671e-07	2.866e-06
Q497V5	SRBD1	S1 RNA-binding domain-containing protein 1 OS=Mus musculus GN=Srbd1 PE=2 SV=2	110413	10	12.3		6.98		2.938e-07
Q0VGB7	PP4R2	Serine/threonine-protein phosphatase 4 regulatory subunit 2 OS=Mus musculus GN=Ppp4r2 PE=1 SV=1	46527.9	10	42.9		5.98		5.363e-07
P50516	VATA	V-type proton ATPase catalytic subunit A OS=Mus musculus GN=Atp6v1a PE=1 SV=2	68462.7	11	27.9		6.95		4.005e-07
P47963	RL13	60S ribosomal protein L13 OS=Mus musculus GN=Rpl13 PE=1 SV=3	24344.5	9	37.4		8.94		3.57e-06
O09106	HDAC1	Histone deacetylase 1 OS=Mus musculus GN=Hdac1 PE=1 SV=1	55183.8	18	40.5	2	2	1.53e-07	2.423e-07
Q9DBY0-2	FOXP4	Isoform 2 of Forkhead box protein P4 OS=Mus musculus GN=Foxp4	73941.8	8	23.2		5.95		2.376e-07
Q99KK2	NEUA	N-acylneuraminate cytidylyltransferase OS=Mus musculus GN=Cmas PE=1 SV=2	48125.8	6	20.6	1	3	2.982e-08	2.931e-07
Q8R326	PSPC1	Paraspeckle component 1 OS=Mus musculus GN=Pspc1 PE=1 SV=1	58865.4	12	32.5	1.99	2.99	3.037e-07	3.662e-07
P97470	PP4C	Serine/threonine-protein phosphatase 4 catalytic subunit OS=Mus musculus GN=Ppp4c PE=1 SV=2	35147.5	8	36.5	1	4	1.008e-07	4.702e-07
Q8C754	VPS52	Vacuolar protein sorting-associated protein 52 homolog OS=Mus musculus GN=Vps52 PE=1 SV=1	82264.8	7	13.7		8		4.975e-07
Q8VE19	MIO	WD repeat-containing protein mio OS=Mus musculus GN=Mios PE=1 SV=2	98524	11	16.3		6		2.561e-07
Q6PGC1	DHX29	ATP-dependent RNA helicase DHX29 OS=Mus musculus GN=Dhx29 PE=1 SV=1	154275	12	14.7		3		7.135e-08
Q9JLV1	BAG3	BAG family molecular chaperone regulator 3 OS=Mus musculus GN=Bag3 PE=1 SV=2	61983.3	9	22.7	1.5	2.5	6.179e-08	1.955e-07
Q5SW19	CLU	Clustered mitochondria protein homolog OS=Mus musculus GN=Cluh PE=1 SV=2	152137	14	14.1	0.99	6.95	5.831e-09	2.135e-07
Q76KJ5	RPA34	DNA-directed RNA polymerase I subunit RPA34 OS=Mus musculus GN=Cd3eap PE=1 SV=2	43163.4	11	36.8		5		3.862e-07
Q8CH72	TRI32	E3 ubiquitin-protein ligase TRIM32 OS=Mus musculus GN=Trim32 PE=1 SV=2	72191.4	8	16.9		5		2.969e-07
Q80TP3	UBR5	E3 ubiquitin-protein ligase UBR5 OS=Mus musculus GN=Ubr5 PE=1 SV=2	309603	13	7.6		8.99		9.096e-08
P63158	HMGB1	High mobility group protein B1 OS=Mus musculus GN=Hmgb1 PE=1 SV=2	20326.5	12	42.2		2.93		1.21e-06
Q9EPL8	IPO7	Importin-7 OS=Mus musculus GN=Ipo7 PE=1 SV=2	119716	11	15.1		5		2.278e-07
Q58A65-2	JIP4	Isoform 2 of C-Jun-amino-terminal kinase-interacting protein 4 OS=Mus musculus GN=Spag9	146419	9	11.6	0.97	4.94	2.49e-08	1.23e-07
O88712-2	CTBP1	Isoform 2 of C-terminal-binding protein 1 OS=Mus musculus GN=Ctbp1	46623.9	10	23.5		3.95		6.707e-07
Q924K8-2	MTA3	Isoform 2 of Metastasis-associated protein MTA3 OS=Mus musculus GN=Mta3	59232.6	15	34		4.46		2.004e-07
Q8VBX6-2	MPDZ	Isoform 2 of Multiple PDZ domain protein OS=Mus musculus GN=Mpdz	219275	14	11.2		2.98		4.054e-08
P97863-2	NFIB	Isoform 2 of Nuclear factor 1 B-type OS=Mus musculus GN=Nfib	47609.1	10	39.8		4.94		4.62e-07
Q9CZ44-3	NSF1C	Isoform 3 of NSFL1 cofactor p47 OS=Mus musculus GN=Nsfl1c	41036.6	7	31.6	1	4	4.516e-08	5.268e-07
P61290	PSME3	Proteasome activator complex subunit 3 OS=Mus musculus GN=Psme3 PE=1 SV=1	29559.6	8	38.6		2.97		8.048e-07
Q80VD1	FA98B	Protein FAM98B OS=Mus musculus GN=Fam98b PE=1 SV=1	45446.9	10	28.7	1	3.5	1.767e-07	6.778e-07
Q3TAM9	Q3TAM9	Putative uncharacterized protein OS=Mus musculus GN=Bag3 PE=2 SV=1	61955.2	9	22.7	1.5	2.5	6.179e-08	1.955e-07
O70551	SRPK1	SRSF protein kinase 1 OS=Mus musculus GN=Srpk1 PE=1 SV=2	73222.9	8	17.6		4.95		2.643e-07
B2RXC1	TPC11	Trafficking protein particle complex subunit 11 OS=Mus musculus GN=Trappc11 PE=1 SV=1	128638	10	12.3		6		1.599e-07
P62827	RAN	GTP-binding nuclear protein Ran OS=Mus musculus GN=Ran PE=1 SV=3	24389.6	5	23.6	2.97	2.97	1.19e-06	1.468e-06
P70333	HNRH2	Heterogeneous nuclear ribonucleoprotein H2 OS=Mus musculus GN=Hnrnph2 PE=1 SV=1	49374.4	15	47.2	2	2	3.507e-07	1.769e-07
Q8BKC5	IPO5	Importin-5 OS=Mus musculus GN=Ipo5 PE=1 SV=3	123835	11	15.1		3.96		8.308e-08
P47857-2	PFKAM	Isoform 2 of ATP-dependent 6-phosphofructokinase, muscle type OS=Mus musculus GN=Pfkm	85430.7	12	18.6	1	5	1.924e-07	2.668e-07
Q8BKX1-2	BAIP2	Isoform 2 of Brain-specific angiogenesis inhibitor 1-associated protein 2 OS=Mus musculus GN=Baiap2	57704.1	10	27.9	1	2	2.538e-07	6.591e-08
Q8K2Z4-2	CND1	Isoform 2 of Condensin complex subunit 1 OS=Mus musculus GN=Ncapd2	155981	14	14.6		8.99		2.074e-07
Q80TR8-2	DCAF1	Isoform 2 of DDB1- and CUL4-associated factor 1 OS=Mus musculus GN=Dcaf1	169274	11	10.1	1	7	1.432e-08	2.075e-07
Q8VDM6-2	HNRL1	Isoform 2 of Heterogeneous nuclear ribonucleoprotein U-like protein 1 OS=Mus musculus GN=Hnrnpul1	96194.6	11	24.8		7		3.022e-07
Q9Z1R2	BAG6	Large proline-rich protein BAG6 OS=Mus musculus GN=Bag6 PE=1 SV=1	119394	9	12.1		6.91		2.823e-07
E9PWG6	E9PWG6	Non-SMC condensin I complex, subunit G OS=Mus musculus GN=Ncapg PE=1 SV=1	113086	12	18.1		5.99		2.485e-07
Q9DCE5	PK1IP	p21-activated protein kinase-interacting protein 1 OS=Mus musculus GN=Pak1ip1 PE=1 SV=2	41140.8	8	28.1	1	3	2.847e-08	3.165e-07
Q91ZX7	LRP1	Prolow-density lipoprotein receptor-related protein 1 OS=Mus musculus GN=Lrp1 PE=1 SV=1	505791	19	6.1		5		4.041e-08
P97376	FRG1	Protein FRG1 OS=Mus musculus GN=Frg1 PE=1 SV=2	29181.1	11	51.1	1	1	2.361e-07	8.867e-08
B9EKC3	B9EKC3	Rho GTPase activating protein 5 OS=Mus musculus GN=Arhgap5 PE=2 SV=1	172814	10	9.4		6		7.857e-08
Q9D883	U2AF1	Splicing factor U2AF 35 kDa subunit OS=Mus musculus GN=U2af1 PE=1 SV=4	27851.5	8	38.1	1.99	1.99	1.547e-06	4.578e-07
P62814	VATB2	V-type proton ATPase subunit B, brain isoform OS=Mus musculus GN=Atp6v1b2 PE=1 SV=1	59385.2	10	23.7		4.99		4.132e-07
Q8BH43	WASF2	Wiskott-Aldrich syndrome protein family member 2 OS=Mus musculus GN=Wasf2 PE=1 SV=1	54184	8	20.9		3.97		5.289e-07
P31230	AIMP1	Aminoacyl tRNA synthase complex-interacting multifunctional protein 1 OS=Mus musculus GN=Aimp1 PE=1 SV=2	34065.9	9	44.2	0.99	4.94	6.969e-08	9.848e-07
Q8BP47	SYNC	Asparagine--tRNA ligase, cytoplasmic OS=Mus musculus GN=Nars PE=1 SV=2	64400.1	8	18.1		4		3.277e-07
Q9DC23	DJC10	DnaJ homolog subfamily C member 10 OS=Mus musculus GN=Dnajc10 PE=1 SV=2	90759.3	11	18.8		2		4.315e-08
Q91YE6	IPO9	Importin-9 OS=Mus musculus GN=Ipo9 PE=1 SV=3	116127	10	13.3	1.99	3.98	3.087e-07	1.545e-07
Q8BTV2-2	CPSF7	Isoform 2 of Cleavage and polyadenylation specificity factor subunit 7 OS=Mus musculus GN=Cpsf7	52105.3	7	18.2	1	3	3.04e-08	6.464e-07
Q5F2E7-2	NUFP2	Isoform 2 of Nuclear fragile X mental retardation-interacting protein 2 OS=Mus musculus GN=Nufip2	75808.8	10	25.1		3		8.693e-08
O55201-2	SPT5H	Isoform 2 of Transcription elongation factor SPT5 OS=Mus musculus GN=Supt5h	120914	9	16.2		4		1.249e-07
A2RSY6-2	TRM1L	Isoform 2 of TRMT1-like protein OS=Mus musculus GN=Trmt1l	81025.8	8	27.1		3.95		1.495e-07
Q4VA53-3	PDS5B	Isoform 3 of Sister chromatid cohesion protein PDS5 homolog B OS=Mus musculus GN=Pds5b	165090	8	7.9		4		1.168e-07
Q3UYV9	NCBP1	Nuclear cap-binding protein subunit 1 OS=Mus musculus GN=Ncbp1 PE=1 SV=2	92101.8	9	15.3	1	5	1.277e-08	2.58e-07
Q9DBG5	PLIN3	Perilipin-3 OS=Mus musculus GN=Plin3 PE=1 SV=1	47359	8	33.2		5		6.197e-07
Q8BUK6	HOOK3	Protein Hook homolog 3 OS=Mus musculus GN=Hook3 PE=1 SV=2	83606.7	11	18		6.99		2.662e-07
Q80UJ7	RB3GP	Rab3 GTPase-activating protein catalytic subunit OS=Mus musculus GN=Rab3gap1 PE=1 SV=4	111177	9	15.4		5		1.79e-07
O08856	ELL	RNA polymerase II elongation factor ELL OS=Mus musculus GN=Ell PE=2 SV=2	67285.1	8	20.6		4		2.668e-07
Q9D1J3	SARNP	SAP domain-containing ribonucleoprotein OS=Mus musculus GN=Sarnp PE=1 SV=3	23501.3	8	38.3	1	3	1.331e-07	8.002e-07
Q80W00	PP1RA	Serine/threonine-protein phosphatase 1 regulatory subunit 10 OS=Mus musculus GN=Ppp1r10 PE=1 SV=1	93810.6	9	16		5.94		2.586e-07
E9PX68	E9PX68	Solute carrier family 4 (anion exchanger), member 1, adaptor protein OS=Mus musculus GN=Slc4a1ap PE=1 SV=1	79820.7	10	19.2	0.98	3.94	1.835e-08	1.491e-07
P61965	WDR5	WD repeat-containing protein 5 OS=Mus musculus GN=Wdr5 PE=1 SV=1	36655.5	8	37.1		5.98		9.614e-07
Q9DCD0	6PGD	6-phosphogluconate dehydrogenase, decarboxylating OS=Mus musculus GN=Pgd PE=1 SV=3	53371.2	9	23.6	1	4	7.293e-08	2.228e-07
Q8CAY6	THIC	Acetyl-CoA acetyltransferase, cytosolic OS=Mus musculus GN=Acat2 PE=1 SV=2	41379.3	9	39.3	0.99	2.98	5.125e-08	3.466e-07
A2AEK1	A2AEK1	AlphaCstF-64 variant 4 OS=Mus musculus GN=Cstf2 PE=1 SV=1	58696.2	8	21.5		3.95		3.471e-07
Q8K298	ANLN	Anillin OS=Mus musculus GN=Anln PE=1 SV=2	123042	10	12		5		1.739e-07
Q9CXW3	CYBP	Calcyclin-binding protein OS=Mus musculus GN=Cacybp PE=1 SV=1	26547.8	6	38		4		7.395e-07
P33611	DPOA2	DNA polymerase alpha subunit B OS=Mus musculus GN=Pola2 PE=1 SV=2	66334.6	7	18.2	0.99	3.96	2.36e-08	2.697e-07
P20664	PRI1	DNA primase small subunit OS=Mus musculus GN=Prim1 PE=1 SV=1	49372	7	16.5		5		4.999e-07
Q61553	FSCN1	Fascin OS=Mus musculus GN=Fscn1 PE=1 SV=4	54618	11	30.2		3		1.575e-07
Q8CI11	GNL3	Guanine nucleotide-binding protein-like 3 OS=Mus musculus GN=Gnl3 PE=1 SV=2	60892.9	9	23.2		7		4.625e-07
Q99L47	F10A1	Hsc70-interacting protein OS=Mus musculus GN=St13 PE=1 SV=1	41736.6	6	15.7		3.96		5.282e-07
Q9CZX0-2	ELP3	Isoform 2 of Elongator complex protein 3 OS=Mus musculus GN=Elp3	62507.1	9	21.9	1	2	1.495e-07	1.138e-07
P47856-2	GFPT1	Isoform 2 of Glutamine--fructose-6-phosphate aminotransferase [isomerizing] 1 OS=Mus musculus GN=Gfpt1	78687.3	8	14.7		4		2.047e-07
Q8CCS6-2	PABP2	Isoform 2 of Polyadenylate-binding protein 2 OS=Mus musculus GN=Pabpn1	34072.8	4	41.4		4		7.236e-07
Q569Z5-2	DDX46	Isoform 2 of Probable ATP-dependent RNA helicase DDX46 OS=Mus musculus GN=Ddx46	117240	12	14.2	1	4	1.387e-08	2.097e-07
Q922S8	KIF2C	Kinesin-like protein KIF2C OS=Mus musculus GN=Kif2c PE=1 SV=1	81178.3	8	14.8		4.94		1.432e-07
E9QPE7	E9QPE7	Myosin-11 OS=Mus musculus GN=Myh11 PE=1 SV=1	228722	30	15.6	0.99	4.88	5.021e-08	2.386e-07
Q99KC3	Q99KC3	Nop2 protein OS=Mus musculus GN=Nop2 PE=2 SV=1	46913.5	8	35.6		3		8.395e-07
Q78ZA7	NP1L4	Nucleosome assembly protein 1-like 4 OS=Mus musculus GN=Nap1l4 PE=1 SV=1	47458.3	7	28.5	1	4	3.703e-08	2.658e-07
Q5SUR0	PUR4	Phosphoribosylformylglycinamidine synthase OS=Mus musculus GN=Pfas PE=1 SV=1	144934	7	9.2		7		1.798e-07
Q5SWD9	TSR1	Pre-rRNA-processing protein TSR1 homolog OS=Mus musculus GN=Tsr1 PE=1 SV=1	92280.9	9	16.3		3		9.028e-08
Q3U048	Q3U048	Putative uncharacterized protein (Fragment) OS=Mus musculus GN=Arhgef11 PE=2 SV=1	163916	15	16.1	0.52	0.52	7.947e-09	4.365e-09
Q80ZX0	Q80ZX0	Sec24 related gene family, member B (S. cerevisiae) OS=Mus musculus GN=Sec24b PE=1 SV=1	135825	8	9.1	0.99	4.94	5.412e-08	1.435e-07
A2RTV1	A2RTV1	Serpina3h protein OS=Mus musculus GN=Serpina3h PE=2 SV=1	45816.9	7	27.6		1.98		1.754e-07
Q91W90	TXND5	Thioredoxin domain-containing protein 5 OS=Mus musculus GN=Txndc5 PE=1 SV=2	46494	6	24.5		2		1.516e-07
Q8K2L8	TPC12	Trafficking protein particle complex subunit 12 OS=Mus musculus GN=Trappc12 PE=1 SV=2	87873	6	13.4		5.96		2.275e-07
Q8CHY6	P66A	Transcriptional repressor p66 alpha OS=Mus musculus GN=Gatad2a PE=1 SV=2	67600.4	10	24.6		6		2.601e-07
Q8C006	TRI35	Tripartite motif-containing protein 35 OS=Mus musculus GN=Trim35 PE=1 SV=2	57452.3	13	35.7	0.99	1.98	8.962e-08	1.315e-07
Q6PE01	SNR40	U5 small nuclear ribonucleoprotein 40 kDa protein OS=Mus musculus GN=Snrnp40 PE=1 SV=1	39340.8	7	33		5		5.735e-07
Q9EPC1	PARVA	Alpha-parvin OS=Mus musculus GN=Parva PE=1 SV=1	42411.6	8	26.8		2		2.167e-07
O54825	BYST	Bystin OS=Mus musculus GN=Bysl PE=1 SV=3	49878.1	8	20.9		1.99		2.768e-07
O88874	CCNK	Cyclin-K OS=Mus musculus GN=Ccnk PE=1 SV=3	64470.8	9	27.6		5		3.621e-07
O35075	DSCR3	Down syndrome critical region protein 3 homolog OS=Mus musculus GN=Dscr3 PE=1 SV=1	33021.3	4	17.2	1	4	4.409e-07	7.74e-07
Q3UMY5	EMAL4	Echinoderm microtubule-associated protein-like 4 OS=Mus musculus GN=Eml4 PE=1 SV=1	110191	7	8.6		2.99		8.932e-08
P10922	H10	Histone H1.0 OS=Mus musculus GN=H1f0 PE=2 SV=4	20888.2	8	32.5		8		2.936e-06
P28740-1	KIF2A	Isoform 1 of Kinesin-like protein KIF2A OS=Mus musculus GN=Kif2a	84024.6	11	15.3		5.97		2.266e-07
Q6EDY6-3	CARL1	Isoform 3 of F-actin-uncapping protein LRRC16A OS=Mus musculus GN=Carmil1	147459	11	11.1		2.99		5.515e-08
Q8R323	RFC3	Replication factor C subunit 3 OS=Mus musculus GN=Rfc3 PE=1 SV=1	30689.9	10	44.1		4		5.008e-07
Q80UU2	RPP38	Ribonuclease P protein subunit p38 OS=Mus musculus GN=Rpp38 PE=1 SV=1	29636.2	6	30.8	1	5	3.22e-07	5.147e-07
Q91YK2	RRP1B	Ribosomal RNA processing protein 1 homolog B OS=Mus musculus GN=Rrp1b PE=1 SV=2	80748.2	10	21.1		9		4.007e-07
A0AUN0	A0AUN0	Sec23ip protein (Fragment) OS=Mus musculus GN=Sec23ip PE=2 SV=1	110970	8	12.6		4.95		2.818e-07
Q3TWW8	SRSF6	Serine/arginine-rich splicing factor 6 OS=Mus musculus GN=Srsf6 PE=1 SV=1	39092.2	11	26.3	1	5	7.963e-08	1.427e-06
P14576	SRP54	Signal recognition particle 54 kDa protein OS=Mus musculus GN=Srp54 PE=1 SV=2	55828.4	11	30.2	0.99	3.97	1.577e-08	1.909e-07
E9PWG2	E9PWG2	Trafficking protein particle complex 8 OS=Mus musculus GN=Trappc8 PE=1 SV=1	161224	8	9.2		5.94		1.35e-07
P10711	TCEA1	Transcription elongation factor A protein 1 OS=Mus musculus GN=Tcea1 PE=1 SV=2	33949	9	36.9		4.95		5.75e-07
Q922U1	PRPF3	U4/U6 small nuclear ribonucleoprotein Prp3 OS=Mus musculus GN=Prpf3 PE=1 SV=1	77415	9	17.7	1	5	2.405e-08	2.414e-07
Q9CXL3	CG050	Uncharacterized protein C7orf50 homolog OS=Mus musculus PE=1 SV=3	22208.8	8	49.7		4		6.927e-07
Q9DBR0	AKAP8	A-kinase anchor protein 8 OS=Mus musculus GN=Akap8 PE=1 SV=1	76444.6	8	21.5	1	4	7.914e-08	1.744e-07
P35564	CALX	Calnexin OS=Mus musculus GN=Canx PE=1 SV=1	67397.8	6	12.5		6		5.169e-07
Q8CFI7	RPB2	DNA-directed RNA polymerase II subunit RPB2 OS=Mus musculus GN=Polr2b PE=1 SV=2	134167	10	11.8		4		1.252e-07
Q62419	SH3G1	Endophilin-A2 OS=Mus musculus GN=Sh3gl1 PE=1 SV=1	41614.3	7	23.4		5		4.452e-07
Q8BMQ2	TF3C4	General transcription factor 3C polypeptide 4 OS=Mus musculus GN=Gtf3c4 PE=1 SV=2	91807.5	11	18.1		6.93		3.422e-07
Q3THK3	T2FA	General transcription factor IIF subunit 1 OS=Mus musculus GN=Gtf2f1 PE=1 SV=2	57350.6	8	21.9	1	3.99	2.205e-08	2.575e-07
P51859	HDGF	Hepatoma-derived growth factor OS=Mus musculus GN=Hdgf PE=1 SV=2	26306.7	7	51.5		3.98		1.317e-06
Q61081	CDC37	Hsp90 co-chaperone Cdc37 OS=Mus musculus GN=Cdc37 PE=1 SV=1	44673	7	20.6	1	4	2.178e-08	3.681e-07
O35343	IMA3	Importin subunit alpha-3 OS=Mus musculus GN=Kpna4 PE=1 SV=1	58030.7	10	29.6		2.97		2.025e-07
Q01147-2	CREB1	Isoform 2 of Cyclic AMP-responsive element-binding protein 1 OS=Mus musculus GN=Creb1	31012.9	4	17.8		3.95		6.425e-07
Q8K1M6-2	DNM1L	Isoform 2 of Dynamin-1-like protein OS=Mus musculus GN=Dnm1l	79636.7	9	21.2	0.99	1.98	3.357e-08	1.146e-07
P59328-3	WDHD1	Isoform 3 of WD repeat and HMG-box DNA-binding protein 1 OS=Mus musculus GN=Wdhd1	124629	9	11.9		6		1.536e-07
Q9Z2D6-2	MECP2	Isoform B of Methyl-CpG-binding protein 2 OS=Mus musculus GN=Mecp2	53687.1	8	27.7		4		3.491e-07
Q8BUI3	LRWD1	Leucine-rich repeat and WD repeat-containing protein 1 OS=Mus musculus GN=LRWD1 PE=2 SV=1	71728.9	7	14		3		1.137e-07
Q922L6	NELFD	Negative elongation factor D OS=Mus musculus GN=Nelfcd PE=1 SV=2	68063.3	6	15.2	1	3	2.803e-07	2.198e-07
Q3TKY6	CWC27	Peptidyl-prolyl cis-trans isomerase CWC27 homolog OS=Mus musculus GN=Cwc27 PE=1 SV=1	53636	6	19.4		3		3.703e-07
Q9DBJ1	PGAM1	Phosphoglycerate mutase 1 OS=Mus musculus GN=Pgam1 PE=1 SV=3	28885.9	8	55.1	1	1	9.841e-07	8.954e-08
Q91VI7	RINI	Ribonuclease inhibitor OS=Mus musculus GN=Rnh1 PE=1 SV=1	49937.2	7	26.3		4		4.074e-07
E9Q6E5	E9Q6E5	Serine/arginine-rich-splicing factor 11 OS=Mus musculus GN=Srsf11 PE=1 SV=1	39917.6	5	20.3		2.97		4.507e-07
P63330	PP2AA	Serine/threonine-protein phosphatase 2A catalytic subunit alpha isoform OS=Mus musculus GN=Ppp2ca PE=1 SV=1	35675.5	8	35	1	3	1.757e-07	3.919e-07
Q9EP82	WDR4	tRNA (guanine-N(7)-)-methyltransferase non-catalytic subunit WDR4 OS=Mus musculus GN=Wdr4 PE=1 SV=2	45834.9	6	23.2		2.99		3.138e-07
Q922F4	TBB6	Tubulin beta-6 chain OS=Mus musculus GN=Tubb6 PE=1 SV=1	50184.2	18	53.2		2.99		3.093e-07
Q9DBT5	AMPD2	AMP deaminase 2 OS=Mus musculus GN=Ampd2 PE=1 SV=1	94870	12	20.1		5		1.863e-07
Q8BZQ7	ANC2	Anaphase-promoting complex subunit 2 OS=Mus musculus GN=Anapc2 PE=1 SV=2	95580	8	11.9		4		1.96e-07
O54774	AP3D1	AP-3 complex subunit delta-1 OS=Mus musculus GN=Ap3d1 PE=1 SV=1	135338	10	11.9		6.97		2.789e-07
Q9CWK3	CD2B2	CD2 antigen cytoplasmic tail-binding protein 2 OS=Mus musculus GN=Cd2bp2 PE=1 SV=1	38196.4	8	39.5		2		2.453e-07
P48722-2	HS74L	Isoform 2 of Heat shock 70 kDa protein 4L OS=Mus musculus GN=Hspa4l	94556.6	12	20.2		4		2.666e-07
Q61210-2	ARHG1	Isoform 2 of Rho guanine nucleotide exchange factor 1 OS=Mus musculus GN=Arhgef1	104841	8	12.6		4.96		9.472e-08
P98078-2	DAB2	Isoform p93 of Disabled homolog 2 OS=Mus musculus GN=Dab2	68026.8	7	16.7		2.98		1.791e-07
Q64514-2	TPP2	Isoform Short of Tripeptidyl-peptidase 2 OS=Mus musculus GN=Tpp2	138669	11	14		1.97		4.925e-08
A0T1J8	A0T1J8	LIM domain only 7 OS=Mus musculus GN=Lmo7 PE=2 SV=1	192939	34	28.3	1	3.99	1.221e-07	1.528e-07
Q61166	MARE1	Microtubule-associated protein RP/EB family member 1 OS=Mus musculus GN=Mapre1 PE=1 SV=3	30069.3	5	31	1	3	6.922e-08	2.727e-07
Q9D0L8	MCES	mRNA cap guanine-N7 methyltransferase OS=Mus musculus GN=Rnmt PE=1 SV=1	53383.7	8	23.4		5.94		4.345e-07
Q91VX2	UBAP2	Ubiquitin-associated protein 2 OS=Mus musculus GN=Ubap2 PE=1 SV=1	118087	7	10.5		5		1.557e-07
Q7TPR4	ACTN1	Alpha-actinin-1 OS=Mus musculus GN=Actn1 PE=1 SV=1	103256	78	82.3		2		2.026e-08
P53995	APC1	Anaphase-promoting complex subunit 1 OS=Mus musculus GN=Anapc1 PE=1 SV=2	216430	10	7.5		1.98		4.651e-08
Q3UL36	ARGL1	Arginine and glutamate-rich protein 1 OS=Mus musculus GN=Arglu1 PE=1 SV=2	32939.7	7	22.5	0.99	4	8.312e-08	7.817e-07
P26231	CTNA1	Catenin alpha-1 OS=Mus musculus GN=Ctnna1 PE=1 SV=1	100314	8	15.3		4.02		1.181e-07
Q04857	CO6A1	Collagen alpha-1(VI) chain OS=Mus musculus GN=Col6a1 PE=1 SV=1	108728	7	8.7		1		1.159e-08
G3X8X0	G3X8X0	DEAH (Asp-Glu-Ala-His) box polypeptide 16 OS=Mus musculus GN=Dhx16 PE=1 SV=1	119320	8	8.4		1.98		8.402e-08
Q91YQ5	RPN1	Dolichyl-diphosphooligosaccharide--protein glycosyltransferase subunit 1 OS=Mus musculus GN=Rpn1 PE=1 SV=1	68664.9	6	11.5		5.94		4.764e-07
Q9CSH3	RRP44	Exosome complex exonuclease RRP44 OS=Mus musculus GN=Dis3 PE=1 SV=4	109039	8	9.9		2		8.399e-08
P70288	HDAC2	Histone deacetylase 2 OS=Mus musculus GN=Hdac2 PE=1 SV=1	55438.9	13	33.4	0.99	4.95	2.137e-07	5.093e-07
O55222	ILK	Integrin-linked protein kinase OS=Mus musculus GN=Ilk PE=1 SV=2	51466	8	19		2		1.677e-07
P30999-2	CTND1	Isoform 2 of Catenin delta-1 OS=Mus musculus GN=Ctnnd1	104310	9	14.7	0.99	2.97	2.445e-08	1.077e-07
Q5SUF2-2	LC7L3	Isoform 2 of Luc7-like protein 3 OS=Mus musculus GN=Luc7l3	51545.2	9	25.2		6		5.687e-07
P19426-2	NELFE	Isoform 2 of Negative elongation factor E OS=Mus musculus GN=Nelfe	41566	7	31.1		4		3.376e-07
Q91Z31-2	PTBP2	Isoform 2 of Polypyrimidine tract-binding protein 2 OS=Mus musculus GN=Ptbp2	57596.9	10	29.2		1.99		1.743e-07
P63085	MK01	Mitogen-activated protein kinase 1 OS=Mus musculus GN=Mapk1 PE=1 SV=3	41339.2	8	24.9	1	1.99	8.942e-08	4.644e-07
A0A0X1KG62	A0A0X1KG62	Negative elongation factor B OS=Mus musculus GN=Nelfb PE=1 SV=1	70456.9	9	20.9		5.96		4.278e-07
Q9WV70	NOC2L	Nucleolar complex protein 2 homolog OS=Mus musculus GN=Noc2l PE=1 SV=2	85586.8	8	11.8		3.32		3.052e-07
Q8R409	HEXI1	Protein HEXIM1 OS=Mus musculus GN=Hexim1 PE=1 SV=1	40308.7	6	26.7		4		1.792e-07
P23249	MOV10	Putative helicase MOV-10 OS=Mus musculus GN=Mov10 PE=1 SV=2	115949	10	11.9		6		2.176e-07
Q3TSG4	ALKB5	RNA demethylase ALKBH5 OS=Mus musculus GN=Alkbh5 PE=1 SV=2	44491.7	8	25.1		3		4.716e-07
Q8K1N4	SPAS2	Spermatogenesis-associated serine-rich protein 2 OS=Mus musculus GN=Spats2 PE=1 SV=1	59081.7	8	20.9		7		3.888e-07
O54941	SMCE1	SWI/SNF-related matrix-associated actin-dependent regulator of chromatin subfamily E member 1 OS=Mus musculus GN=Smarce1 PE=1 SV=1	46717.6	6	24.8	1	3.99	2.333e-08	3.054e-07
Q91WQ3	SYYC	Tyrosine--tRNA ligase, cytoplasmic OS=Mus musculus GN=Yars PE=1 SV=3	59212.2	24	49.8		1.5		1.637e-07
Q91WM3	U3IP2	U3 small nucleolar RNA-interacting protein 2 OS=Mus musculus GN=Rrp9 PE=1 SV=1	52200.9	8	18.1		5		8.01e-07
Q8BFQ4	WDR82	WD repeat-containing protein 82 OS=Mus musculus GN=Wdr82 PE=1 SV=1	35146.5	4	15.3		3		5.494e-07
Q923D5	WBP11	WW domain-binding protein 11 OS=Mus musculus GN=Wbp11 PE=1 SV=2	70014.9	6	16.8		3		9.175e-08
Q9JII6	AK1A1	Alcohol dehydrogenase [NADP(+)] OS=Mus musculus GN=Akr1a1 PE=1 SV=3	36682	4	18.2		2		1.85e-07
P61222	ABCE1	ATP-binding cassette sub-family E member 1 OS=Mus musculus GN=Abce1 PE=1 SV=1	64626.6	11	28.3		4		2.257e-07
Q8R1Q8	DC1L1	Cytoplasmic dynein 1 light intermediate chain 1 OS=Mus musculus GN=Dync1li1 PE=1 SV=1	56723.1	6	17.4		4.95		1.779e-07
O35345	IMA7	Importin subunit alpha-7 OS=Mus musculus GN=Kpna6 PE=1 SV=2	60070.5	6	15		2		8.956e-08
Q922J3-2	CLIP1	Isoform 2 of CAP-Gly domain-containing linker protein 1 OS=Mus musculus GN=Clip1	161551	11	11.3		4.95		1.048e-07
Q9Z2D8-2	MBD3	Isoform 2 of Methyl-CpG-binding domain protein 3 OS=Mus musculus GN=Mbd3	29123.8	4	16.6		2.97		3.114e-07
O55143-2	AT2A2	Isoform 2 of Sarcoplasmic/endoplasmic reticulum calcium ATPase 2 OS=Mus musculus GN=Atp2a2	116831	7	10.9		3.99		1.654e-07
Q3UHD6-2	SNX27	Isoform 2 of Sorting nexin-27 OS=Mus musculus GN=Snx27	61094.4	9	25.7		2.99		2.372e-07
Q6NV83-2	SR140	Isoform 2 of U2 snRNP-associated SURP motif-containing protein OS=Mus musculus GN=U2surp	118494	9	14		4.95		1.425e-07
P97379-2	G3BP2	Isoform B of Ras GTPase-activating protein-binding protein 2 OS=Mus musculus GN=G3bp2	50879.1	11	28.3		1		1.027e-07
Q9Z204-2	HNRPC	Isoform C1 of Heterogeneous nuclear ribonucleoproteins C1/C2 OS=Mus musculus GN=Hnrnpc	36972.7	7	26.7		4		5.232e-07
P42227-2	STAT3	Isoform Stat3B of Signal transducer and activator of transcription 3 OS=Mus musculus GN=Stat3	83289.4	7	14.4		5.94		2.831e-07
Q9JJK2	LANC2	LanC-like protein 2 OS=Mus musculus GN=Lancl2 PE=1 SV=1	49837.1	5	18.4		2		1.622e-07
P70670	NACAM	Nascent polypeptide-associated complex subunit alpha, muscle-specific form OS=Mus musculus GN=Naca PE=1 SV=2	22620.4	3	20.2	1	2	4.987e-09	6.373e-08
Q99K85	SERC	Phosphoserine aminotransferase OS=Mus musculus GN=Psat1 PE=1 SV=1	40555.8	7	25.1		2.98		3.163e-07
Q8K205	Q8K205	Processing of 1, ribonuclease P/MRP family, (S. cerevisiae) OS=Mus musculus GN=Pop1 PE=1 SV=1	114243	8	10.2		7		2.774e-07
Q3U6B1	Q3U6B1	Putative uncharacterized protein (Fragment) OS=Mus musculus GN=G3bp2 PE=2 SV=1	61190.3	10	22.9		1		8.382e-08
Q80SW1	SAHH2	S-adenosylhomocysteine hydrolase-like protein 1 OS=Mus musculus GN=Ahcyl1 PE=1 SV=1	59057.5	8	18.1		1		7.243e-08
Q6NXL1	Q6NXL1	Sec24 related gene family, member D (S. cerevisiae) OS=Mus musculus GN=Sec24d PE=1 SV=1	112909	6	7.6	1	3	4.5e-08	9.933e-08
Q8BH69	SPS1	Selenide, water dikinase 1 OS=Mus musculus GN=Sephs1 PE=1 SV=1	43014.8	5	21.2	1	2	2.632e-08	2.477e-07
Q9JKC8	AP3M1	AP-3 complex subunit mu-1 OS=Mus musculus GN=Ap3m1 PE=1 SV=1	47001.4	4	18.9		2.97		3.44e-07
Q8VHK9	DHX36	ATP-dependent RNA helicase DHX36 OS=Mus musculus GN=Dhx36 PE=1 SV=2	114100	11	14.9	0.99	2.99	2.36e-08	1.009e-07
P53569	CEBPZ	CCAAT/enhancer-binding protein zeta OS=Mus musculus GN=Cebpz PE=1 SV=2	120603	8	12.2		5.97		1.414e-07
Q8N7N5	DCAF8	DDB1- and CUL4-associated factor 8 OS=Mus musculus GN=Dcaf8 PE=1 SV=1	66152.9	7	14.9		3		1.355e-07
Q91YP3	DEOC	Deoxyribose-phosphate aldolase OS=Mus musculus GN=Dera PE=1 SV=1	35047.3	6	30.8		0.99		4.42e-08
Q9DBG6	RPN2	Dolichyl-diphosphooligosaccharide--protein glycosyltransferase subunit 2 OS=Mus musculus GN=Rpn2 PE=1 SV=1	66440.8	5	14.8		4		4.157e-07
A2A5R8	A2A5R8	Double-stranded RNA-binding protein Staufen homolog 1 OS=Mus musculus GN=Stau1 PE=1 SV=1	54276	6	16.9		3.95		3.109e-07
Q8BWY3	ERF1	Eukaryotic peptide chain release factor subunit 1 OS=Mus musculus GN=Etf1 PE=1 SV=4	43652.2	7	20.7		2		2.469e-07
Q9JHI7	EXOS9	Exosome complex component RRP45 OS=Mus musculus GN=Exosc9 PE=1 SV=1	49032	5	13.7		1.98		3.921e-07
Q6P9Q4	FHOD1	FH1/FH2 domain-containing protein 1 OS=Mus musculus GN=Fhod1 PE=1 SV=3	129862	6	11.4	1	4	6.004e-08	6.903e-08
Q8BQM4	HEAT3	HEAT repeat-containing protein 3 OS=Mus musculus GN=Heatr3 PE=1 SV=1	74439.8	7	14.3		2		8.513e-08
Q3V1M1	IGS10	Immunoglobulin superfamily member 10 OS=Mus musculus GN=Igsf10 PE=2 SV=2	286193	9	4.6	1	2	2.185e-08	1.967e-08
Q8R050-2	ERF3A	Isoform 2 of Eukaryotic peptide chain release factor GTP-binding subunit ERF3A OS=Mus musculus GN=Gspt1	55720.2	5	17.7	0.99	2.97	4.361e-08	1.446e-07
Q8R2T8-2	TF3C5	Isoform 2 of General transcription factor 3C polypeptide 5 OS=Mus musculus GN=Gtf3c5	59974.2	5	10.5	1	4	6.217e-08	4.322e-07
Q99LB6-2	MAT2B	Isoform 2 of Methionine adenosyltransferase 2 subunit beta OS=Mus musculus GN=Mat2b	37459	3	15.5		2		2.818e-07
Q80U72-2	SCRIB	Isoform 2 of Protein scribble homolog OS=Mus musculus GN=Scrib	174421	7	6.5		4.95		9.199e-08
Q61598-2	GDIB	Isoform 2 of Rab GDP dissociation inhibitor beta OS=Mus musculus GN=Gdi2	50600.8	5	16.9	1	2	2.047e-07	2.686e-07
Q91V81-2	RBM42	Isoform 2 of RNA-binding protein 42 OS=Mus musculus GN=Rbm42	47310.3	6	23.8		5		3.544e-07
Q91YE7-2	RBM5	Isoform 2 of RNA-binding protein 5 OS=Mus musculus GN=Rbm5	92488.1	9	10.1		5		2.345e-07
P84104-2	SRSF3	Isoform Short of Serine/arginine-rich splicing factor 3 OS=Mus musculus GN=Srsf3	19381.9	6	46		2		1.023e-06
E9Q7C9	E9Q7C9	Kinesin light chain 1 OS=Mus musculus GN=Klc1 PE=1 SV=1	69632	11	22.5	1	3.49	2.909e-08	3.033e-07
Q9EQ61	PESC	Pescadillo homolog OS=Mus musculus GN=Pes1 PE=1 SV=1	68350.3	7	17.3	1	2	2.834e-07	1.128e-07
Q91VN6	DDX41	Probable ATP-dependent RNA helicase DDX41 OS=Mus musculus GN=Ddx41 PE=1 SV=2	69901	5	11.1		4		3.164e-07
Q8K297	GT251	Procollagen galactosyltransferase 1 OS=Mus musculus GN=Colgalt1 PE=1 SV=2	71195.2	5	9.9	1	2	1.719e-07	1.216e-07
Q9WUK4	RFC2	Replication factor C subunit 2 OS=Mus musculus GN=Rfc2 PE=1 SV=1	38890	7	26.6		5		6.455e-07
Q9D706	RPAP3	RNA polymerase II-associated protein 3 OS=Mus musculus GN=Rpap3 PE=1 SV=1	74230.1	6	11.1		1		4.249e-08
Q5XJE5	LEO1	RNA polymerase-associated protein LEO1 OS=Mus musculus GN=Leo1 PE=1 SV=2	75750.4	6	11.1		2		7.206e-08
Q8BGT7	SPF30	Survival of motor neuron-related-splicing factor 30 OS=Mus musculus GN=Smndc1 PE=1 SV=1	26674.5	4	28.6		3		2.827e-07
Q9D2E2	TOE1	Target of EGR1 protein 1 OS=Mus musculus GN=Toe1 PE=1 SV=1	56979.1	4	14.7	1	1	3.309e-08	5.009e-08
B1AZI6	THOC2	THO complex subunit 2 OS=Mus musculus GN=Thoc2 PE=1 SV=1	183127	5	3.3		2.99		6.631e-08
Q7TMM9	TBB2A	Tubulin beta-2A chain OS=Mus musculus GN=Tubb2a PE=1 SV=1	50001	23	60.7		3.97		3.06e-07
Q8K1X1	WDR11	WD repeat-containing protein 11 OS=Mus musculus GN=Wdr11 PE=1 SV=1	136241	5	6.6		3		1.146e-07
Q9CXW4	RL11	60S ribosomal protein L11 OS=Mus musculus GN=Rpl11 PE=1 SV=4	19048.1	5	26.9		0.99		6.316e-07
Q571I9	A16A1	Aldehyde dehydrogenase family 16 member A1 OS=Mus musculus GN=Aldh16a1 PE=1 SV=2	79655.1	6	11		3		1.151e-07
O08739	AMPD3	AMP deaminase 3 OS=Mus musculus GN=Ampd3 PE=1 SV=2	89727.1	7	14		1		3.071e-08
Q9CQC6	BZW1	Basic leucine zipper and W2 domain-containing protein 1 OS=Mus musculus GN=Bzw1 PE=1 SV=1	51303.5	8	17.9		6		7.495e-07
Q8R5C5	ACTY	Beta-centractin OS=Mus musculus GN=Actr1b PE=1 SV=1	42362.8	13	54.3	1	1	9.633e-08	2.038e-07
Q99LJ0	CT2NL	CTTNBP2 N-terminal-like protein OS=Mus musculus GN=Cttnbp2nl PE=1 SV=1	69978.6	9	18.5		3		1.316e-07
Q03147	CDK7	Cyclin-dependent kinase 7 OS=Mus musculus GN=Cdk7 PE=1 SV=2	28650	4	19		2		3.222e-07
Q9CQJ4	RING2	E3 ubiquitin-protein ligase RING2 OS=Mus musculus GN=Rnf2 PE=1 SV=1	37689.7	4	14		3.98		7.007e-07
P59325	IF5	Eukaryotic translation initiation factor 5 OS=Mus musculus GN=Eif5 PE=1 SV=1	49063.8	4	16.4	1	2	7.838e-08	8.634e-08
Q9D753	EXOS8	Exosome complex component RRP43 OS=Mus musculus GN=Exosc8 PE=1 SV=1	29972.3	6	37		2.99		4.03e-07
Q9CZD3	GARS	Glycine--tRNA ligase OS=Mus musculus GN=Gars PE=1 SV=1	82041.9	5	10.2		3		1.923e-07
Q8VI75	IPO4	Importin-4 OS=Mus musculus GN=Ipo4 PE=1 SV=1	119522	6	4.6		2.99		1.296e-07
Q4LDD4-2	ARAP1	Isoform 2 of Arf-GAP with Rho-GAP domain, ANK repeat and PH domain-containing protein 1 OS=Mus musculus GN=Arap1	83364.7	5	10.5		2		4.105e-08
A2A432-2	CUL4B	Isoform 2 of Cullin-4B OS=Mus musculus GN=Cul4b	102597	8	9.5	1	3.96	3.591e-08	7.827e-08
Q8K284-2	TF3C1	Isoform 2 of General transcription factor 3C polypeptide 1 OS=Mus musculus GN=Gtf3c1	237902	13	10	1	6.96	3.349e-09	6.764e-08
Q99M31-2	HSP7E	Isoform 2 of Heat shock 70 kDa protein 14 OS=Mus musculus GN=Hspa14	54760	7	17.3	1	2	9.432e-08	1.401e-07
Q3UMG5-2	LRCH2	Isoform 2 of Leucine-rich repeat and calponin homology domain-containing protein 2 OS=Mus musculus GN=Lrch2	86291.7	5	10.3		1		1.28e-07
Q9D4J7-2	PHF6	Isoform 2 of PHD finger protein 6 OS=Mus musculus GN=Phf6	41221	6	28.5		2.97		3.254e-07
Q6PDH0-2	PHLB1	Isoform 2 of Pleckstrin homology-like domain family B member 1 OS=Mus musculus GN=Phldb1	145347	8	10	0.98	1	4.305e-08	2.415e-08
Q8C6B2-2	RTKN	Isoform 2 of Rhotekin OS=Mus musculus GN=Rtkn	61680.2	6	18.3		3.98		1.577e-07
Q80X41-2	VRK1	Isoform 2 of Serine/threonine-protein kinase VRK1 OS=Mus musculus GN=Vrk1	47556.4	6	18.2		2		2.105e-07
O88811-2	STAM2	Isoform 2 of Signal transducing adapter molecule 2 OS=Mus musculus GN=Stam2	57562.6	7	18.3		3		2.937e-07
Q05860-5	FMN1	Isoform 5 of Formin-1 OS=Mus musculus GN=Fmn1	133485	12	14.1	0.68	1.36	2.138e-08	3.484e-08
Q60605-2	MYL6	Isoform Smooth muscle of Myosin light polypeptide 6 OS=Mus musculus GN=Myl6	16986.2	5	57.1		3		5.851e-07
E9PUA5	E9PUA5	Kinesin-like protein OS=Mus musculus GN=Kifc5b PE=1 SV=1	73835.1	17	35.7		3		1.474e-07
Q9CRC8	LRC40	Leucine-rich repeat-containing protein 40 OS=Mus musculus GN=Lrrc40 PE=1 SV=2	68186.3	8	22.3		3		1.325e-07
Q922H4	GMPPA	Mannose-1-phosphate guanyltransferase alpha OS=Mus musculus GN=Gmppa PE=1 SV=1	47146.5	5	15.7		3		1.938e-07
O35691	PININ	Pinin OS=Mus musculus GN=Pnn PE=1 SV=4	82671.6	8	13.1		2		6.918e-08
Q8BXU2	Q8BXU2	Poly [ADP-ribose] polymerase OS=Mus musculus GN=Parp3 PE=2 SV=1	59520	6	18.6		0.99		2.85e-08
B2RXQ2	B2RXQ2	Ppfia1 protein OS=Mus musculus GN=Ppfia1 PE=1 SV=1	143095	9	12		5		9.452e-08
Q8K4F6	NSUN5	Probable 28S rRNA (cytosine-C(5))-methyltransferase OS=Mus musculus GN=Nsun5 PE=2 SV=2	51123.7	6	21.3		4		2.822e-07
P97372	PSME2	Proteasome activator complex subunit 2 OS=Mus musculus GN=Psme2 PE=1 SV=4	27094.2	8	51.5		2		4.514e-07
Q60692	PSB6	Proteasome subunit beta type-6 OS=Mus musculus GN=Psmb6 PE=1 SV=3	25416.5	5	20.6	1	1	1.729e-07	9.464e-08
Q9D0F3	LMAN1	Protein ERGIC-53 OS=Mus musculus GN=Lman1 PE=1 SV=1	61397.7	5	15.1		3		2.884e-07
Q11011	PSA	Puromycin-sensitive aminopeptidase OS=Mus musculus GN=Npepps PE=1 SV=2	98713.6	7	8.7		2.99		1.215e-07
Q60790	RASA3	Ras GTPase-activating protein 3 OS=Mus musculus GN=Rasa3 PE=1 SV=2	96088.5	6	11		1		4.092e-08
Q9D7H3	RTCA	RNA 3'-terminal phosphate cyclase OS=Mus musculus GN=RtcA PE=1 SV=2	39361.4	4	14.8		2.97		2.864e-07
Q9CSN1	SNW1	SNW domain-containing protein 1 OS=Mus musculus GN=Snw1 PE=1 SV=3	61567.6	7	22		1.98		8.041e-08
Q9JHS9	CWC15	Spliceosome-associated protein CWC15 homolog OS=Mus musculus GN=Cwc15 PE=1 SV=1	26662.4	7	34.9	1	3	4.988e-08	4.155e-07
Q04863	RELB	Transcription factor RelB OS=Mus musculus GN=Relb PE=1 SV=2	60072.3	5	16.4		1.99		1.262e-07
P62915	TF2B	Transcription initiation factor IIB OS=Mus musculus GN=Gtf2b PE=1 SV=1	34929.7	7	30.4		2		2.189e-07
Q9Z277	BAZ1B	Tyrosine-protein kinase BAZ1B OS=Mus musculus GN=Baz1b PE=1 SV=2	170976	11	9.4		4		4.572e-08
Q05AH6	CK084	Uncharacterized protein C11orf84 homolog OS=Mus musculus PE=1 SV=1	41327.9	5	22		2		3.589e-07
Q9CR57	RL14	60S ribosomal protein L14 OS=Mus musculus GN=Rpl14 PE=1 SV=3	26354	5	25.8		3.98		2.085e-06
Q91W96	APC4	Anaphase-promoting complex subunit 4 OS=Mus musculus GN=Anapc4 PE=1 SV=1	91883.5	4	6.3		3.98		1.658e-07
O35639	ANXA3	Annexin A3 OS=Mus musculus GN=Anxa3 PE=1 SV=4	36423.6	8	29.1		2.95		2.357e-07
P68181	KAPCB	cAMP-dependent protein kinase catalytic subunit beta OS=Mus musculus GN=Prkacb PE=1 SV=2	40772.1	12	37.9	1	2.98	4.473e-08	1.529e-07
Q8K354	CBR3	Carbonyl reductase [NADPH] 3 OS=Mus musculus GN=Cbr3 PE=1 SV=1	31006	6	30		0.5		2.683e-08
Q09XV5	CHD8	Chromodomain-helicase-DNA-binding protein 8 OS=Mus musculus GN=Chd8 PE=1 SV=1	291440	7	5.8		3		4.509e-08
Q8K2X3	STN1	CST complex subunit STN1 OS=Mus musculus GN=Stn1 PE=1 SV=2	40503.7	4	17.9		4		3.611e-07
Q9QWV9	CCNT1	Cyclin-T1 OS=Mus musculus GN=Ccnt1 PE=1 SV=3	80763.6	7	16.9	1	1	2.091e-08	3.033e-08
Q6NZL1	Q6NZL1	DEAH (Asp-Glu-Ala-His) box polypeptide 37 OS=Mus musculus GN=Dhx37 PE=1 SV=1	128589	8	10.3		5.99		1.1e-07
P63037	DNJA1	DnaJ homolog subfamily A member 1 OS=Mus musculus GN=Dnaja1 PE=1 SV=1	44947.5	7	28.2		0.99		5.723e-08
Q8CB77	ELOA1	Elongin-A OS=Mus musculus GN=Eloa PE=1 SV=3	87324.1	9	16.3		2		1e-07
Q8VBV3	EXOS2	Exosome complex component RRP4 OS=Mus musculus GN=Exosc2 PE=1 SV=1	32683.1	3	15		2		2.812e-07
Q9QXE7	TBL1X	F-box-like/WD repeat-containing protein TBL1X OS=Mus musculus GN=Tbl1x PE=1 SV=2	56910.8	10	33.6		2		1.219e-07
Q8CIB5	FERM2	Fermitin family homolog 2 OS=Mus musculus GN=Fermt2 PE=1 SV=1	77948.6	7	15.6		1.98		8.514e-08
Q9CQM9	GLRX3	Glutaredoxin-3 OS=Mus musculus GN=Glrx3 PE=1 SV=1	41785.4	4	10.7		3		3.629e-07
Q9DBF1-2	AL7A1	Isoform 2 of Alpha-aminoadipic semialdehyde dehydrogenase OS=Mus musculus GN=Aldh7a1	58968.4	5	14.5		4.97		1.998e-07
O08795-2	GLU2B	Isoform 2 of Glucosidase 2 subunit beta OS=Mus musculus GN=Prkcsh	58899.8	7	16.9	1	4	4.625e-08	4.006e-07
Q8BZX4-2	SREK1	Isoform 2 of Splicing regulatory glutamine/lysine-rich protein 1 OS=Mus musculus GN=Srek1	69259.2	6	15.9		3.98		1.423e-07
Q5SUQ9-3	CTC1	Isoform 3 of CST complex subunit CTC1 OS=Mus musculus GN=Ctc1	134303	5	8.3		1.5		2.67e-08
Q8BYK6-3	YTHD3	Isoform 3 of YTH domain-containing family protein 3 OS=Mus musculus GN=Ythdf3	65514.7	6	17.8	1	1.99	3.43e-08	4.911e-08
Q68FL6	SYMC	Methionine--tRNA ligase, cytoplasmic OS=Mus musculus GN=Mars PE=1 SV=1	102578	6	10.1		3		1.115e-07
Q6A082	Q6A082	MKIAA0352 protein (Fragment) OS=Mus musculus GN=Zbtb39 PE=2 SV=1	79195.6	6	14.4		2		1.428e-07
O54752	O54752	Naglu OS=Mus musculus GN=Naglu PE=2 SV=1	82760	8	15.7		1		3.198e-08
Q8BG30	NELFA	Negative elongation factor A OS=Mus musculus GN=Nelfa PE=1 SV=1	57697.1	5	18.3		3		2.495e-07
Q80XI4	PI42B	Phosphatidylinositol 5-phosphate 4-kinase type-2 beta OS=Mus musculus GN=Pip4k2b PE=1 SV=1	47396.8	7	18.5		4		1.953e-07
P70398	USP9X	Probable ubiquitin carboxyl-terminal hydrolase FAF-X OS=Mus musculus GN=Usp9x PE=1 SV=2	290787	9	4.4		3		3.083e-08
Q8CJG1	AGO1	Protein argonaute-1 OS=Mus musculus GN=Ago1 PE=1 SV=2	97144.2	14	22.9		2.97		1.047e-07
Q9CYI4	LUC7L	Putative RNA-binding protein Luc7-like 1 OS=Mus musculus GN=Luc7l PE=1 SV=2	28184.2	8	35.1		2.97		3.278e-07
Q8K183	PDXK	Pyridoxal kinase OS=Mus musculus GN=Pdxk PE=1 SV=1	30321.2	4	16	1	2	1.515e-07	1.159e-07
P69566	RANB9	Ran-binding protein 9 OS=Mus musculus GN=Ranbp9 PE=1 SV=1	75918.2	4	8.4		4		2.302e-07
Q8BX09	RBBP5	Retinoblastoma-binding protein 5 OS=Mus musculus GN=Rbbp5 PE=1 SV=2	59133.7	6	15.8	0.99	1.98	4.579e-08	1.816e-07
Q99KH8	STK24	Serine/threonine-protein kinase 24 OS=Mus musculus GN=Stk24 PE=1 SV=1	48050.6	7	18.3		2.99		1.332e-07
P49135	ERCC3	TFIIH basal transcription factor complex helicase XPB subunit OS=Mus musculus GN=Ercc3 PE=2 SV=1	89320.2	5	11		2.99		7.973e-08
A2ASS6	TITIN	Titin OS=Mus musculus GN=Ttn PE=1 SV=1	3723730	21	0.8	0.99	3.96	7.589e-10	3.898e-09
Q93092	TALDO	Transaldolase OS=Mus musculus GN=Taldo1 PE=1 SV=2	42232.6	6	20.2	1	2	9.768e-08	2.137e-07
Q64737	PUR2	Trifunctional purine biosynthetic protein adenosine-3 OS=Mus musculus GN=Gart PE=1 SV=3	107692	6	10.7		1		1.416e-08
Q9Z120	TRMB	tRNA (guanine-N(7)-)-methyltransferase OS=Mus musculus GN=Mettl1 PE=1 SV=1	30655.7	6	29.5		1		3.566e-07
P05213	TBA1B	Tubulin alpha-1B chain OS=Mus musculus GN=Tuba1b PE=1 SV=2	50245.7	23	61.2		0.5		6.201e-08
E9PVU0	E9PVU0	Unconventional myosin-VI OS=Mus musculus GN=Myo6 PE=1 SV=1	145042	7	8		0.99		1.565e-08
Q920Q4	VPS16	Vacuolar protein sorting-associated protein 16 homolog OS=Mus musculus GN=Vps16 PE=1 SV=3	94973.9	6	9.1		1.98		9.487e-08
Q8R307	VPS18	Vacuolar protein sorting-associated protein 18 homolog OS=Mus musculus GN=Vps18 PE=1 SV=2	86319.8	5	10.6		0.99		4.445e-08
Q9CQM8	Q9CQM8	60S ribosomal protein L21 OS=Mus musculus GN=Rpl21 PE=1 SV=1	18603.1	5	36.2		2.97		1.119e-06
Q91W89	MA2C1	Alpha-mannosidase 2C1 OS=Mus musculus GN=Man2c1 PE=1 SV=1	115934	6	8.3		1.98		8.097e-08
P14824	ANXA6	Annexin A6 OS=Mus musculus GN=Anxa6 PE=1 SV=3	75411.2	7	16.5		3.98		1.493e-07
O35218	CPSF2	Cleavage and polyadenylation specificity factor subunit 2 OS=Mus musculus GN=Cpsf2 PE=1 SV=1	88560.8	7	14.5		2.97		1.005e-07
Q9QXK7	CPSF3	Cleavage and polyadenylation specificity factor subunit 3 OS=Mus musculus GN=Cpsf3 PE=1 SV=2	77752.4	6	12.4		2.98		2.235e-07
Q99J95	CDK9	Cyclin-dependent kinase 9 OS=Mus musculus GN=Cdk9 PE=1 SV=1	42842.2	6	16.9	0.99	0.99	3.048e-08	8.743e-08
Q9ER72	SYCC	Cysteine--tRNA ligase, cytoplasmic OS=Mus musculus GN=Cars PE=1 SV=2	95082.2	8	12.2	1	3	2.334e-08	1.388e-07
O54734	OST48	Dolichyl-diphosphooligosaccharide--protein glycosyltransferase 48 kDa subunit OS=Mus musculus GN=Ddost PE=1 SV=2	49081	5	12.9		2		2.103e-07
Q91WG4	ELP2	Elongator complex protein 2 OS=Mus musculus GN=Elp2 PE=1 SV=1	93268	5	7.6		1.99		9.441e-08
Q9D4H1	EXOC2	Exocyst complex component 2 OS=Mus musculus GN=Exoc2 PE=1 SV=1	104164	6	8.3		4		1.736e-07
Q9ERK4	XPO2	Exportin-2 OS=Mus musculus GN=Cse1l PE=1 SV=1	104093	7	9.4		2.97		1.102e-07
Q3TGH6	Q3TGH6	Flap endonuclease 1 OS=Mus musculus GN=Fen1 PE=2 SV=1	42704.1	5	14.7		1.99		2.018e-07
D3Z7I0	D3Z7I0	General transcription factor 3C polypeptide 2 OS=Mus musculus GN=Gtf3c2 PE=1 SV=1	104924	5	10.3		2.97		4.714e-08
Q00612	G6PD1	Glucose-6-phosphate 1-dehydrogenase X OS=Mus musculus GN=G6pdx PE=1 SV=3	59368.9	7	15.7		3		1.565e-07
P52927	HMGA2	High mobility group protein HMGI-C OS=Mus musculus GN=Hmga2 PE=1 SV=1	11830.1	4	55.6		3		3.326e-07
Q8K3X4	I2BPL	Interferon regulatory factor 2-binding protein-like OS=Mus musculus GN=Irf2bpl PE=1 SV=1	80730.1	5	10.2		2		1.219e-07
Q8BTZ4-2	APC5	Isoform 2 of Anaphase-promoting complex subunit 5 OS=Mus musculus GN=Anapc5	81860.2	6	12.4		1.98		6.918e-08
Q5SUQ9-2	CTC1	Isoform 2 of CST complex subunit CTC1 OS=Mus musculus GN=Ctc1	106691	5	8.2		0.5		1.397e-08
Q5DW34-2	EHMT1	Isoform 2 of Histone-lysine N-methyltransferase EHMT1 OS=Mus musculus GN=Ehmt1	136161	7	7.8		2.97		5.581e-08
Q921C5-2	BICD2	Isoform 2 of Protein bicaudal D homolog 2 OS=Mus musculus GN=Bicd2	84880.7	4	9.5		2		9.999e-08
Q924A2-2	CIC	Isoform 2 of Protein capicua homolog OS=Mus musculus GN=Cic	164049	4	5.9		3		6.348e-08
Q3UHX9-2	CI114	Isoform 2 of Putative methyltransferase C9orf114 homolog OS=Mus musculus GN=Spout1	43039	5	21.4	1	1	6.987e-08	1.528e-07
Q8CH25-2	SLTM	Isoform 2 of SAFB-like transcription modulator OS=Mus musculus GN=Sltm	117156	7	8.9		0.99		3.183e-08
Q8CG46-2	SMC5	Isoform 2 of Structural maintenance of chromosomes protein 5 OS=Mus musculus GN=Smc5	129057	8	8.3	1	4	2.005e-08	1.15e-07
Q505F5	LRC47	Leucine-rich repeat-containing protein 47 OS=Mus musculus GN=Lrrc47 PE=1 SV=1	66043.1	6	13.9	1	3	2.934e-08	1.678e-07
Q8C129	LCAP	Leucyl-cystinyl aminopeptidase OS=Mus musculus GN=Lnpep PE=1 SV=1	117535	7	8.5		6.94		2.125e-07
Q9EQK5	MVP	Major vault protein OS=Mus musculus GN=Mvp PE=1 SV=4	97021.8	6	12.3		2		4.447e-08
Q8BP48	MAP11	Methionine aminopeptidase 1 OS=Mus musculus GN=Metap1 PE=1 SV=1	30896.5	4	19.3		2		3.088e-07
P53986	MOT1	Monocarboxylate transporter 1 OS=Mus musculus GN=Slc16a1 PE=1 SV=1	53346.5	3	12	1.98	1.98	1.686e-07	8.322e-08
Q80U93	NU214	Nuclear pore complex protein Nup214 OS=Mus musculus GN=Nup214 PE=1 SV=2	213460	8	5.8		4.99		7e-08
Q99J45	NRBP	Nuclear receptor-binding protein OS=Mus musculus GN=Nrbp1 PE=1 SV=1	59958.2	6	15.3	1	3	3.221e-08	1.275e-07
Q61074	PPM1G	Protein phosphatase 1G OS=Mus musculus GN=Ppm1g PE=1 SV=3	58853.6	5	10		2.98		2.38e-07
Q922P9	GLYR1	Putative oxidoreductase GLYR1 OS=Mus musculus GN=Glyr1 PE=1 SV=1	60559	6	16.7	1	5	1.75e-08	4.936e-07
Q3TA75	Q3TA75	Putative uncharacterized protein (Fragment) OS=Mus musculus GN=Fxr2 PE=2 SV=1	70665.6	12	31.5		3.5		1.198e-07
Q3UDA7	Q3UDA7	Putative uncharacterized protein (Fragment) OS=Mus musculus GN=Npm1 PE=2 SV=1	22164.4	13	80		0.98		3.502e-07
Q3U046	Q3U046	Putative uncharacterized protein (Fragment) OS=Mus musculus GN=Yap1 PE=2 SV=1	25105.6	3	28.7		2		3.004e-07
Q8CGC6	RBM28	RNA-binding protein 28 OS=Mus musculus GN=Rbm28 PE=1 SV=4	84378.4	8	11.1		4.5		1.696e-07
Q8VE97	SRSF4	Serine/arginine-rich splicing factor 4 OS=Mus musculus GN=Srsf4 PE=2 SV=1	55772.6	7	16.8	1	1	1.277e-07	1.229e-07
Q8JZX4	SPF45	Splicing factor 45 OS=Mus musculus GN=Rbm17 PE=1 SV=1	45384.1	4	10.1		1		1.173e-07
Q7TQI3	OTUB1	Ubiquitin thioesterase OTUB1 OS=Mus musculus GN=Otub1 PE=1 SV=2	28091	4	18.7		0.99		8.518e-08
Q9D2N9	VP33A	Vacuolar protein sorting-associated protein 33A OS=Mus musculus GN=Vps33a PE=1 SV=2	67646.2	5	9.4		3		2.343e-07
Q3TIV5	ZC3HF	Zinc finger CCCH domain-containing protein 15 OS=Mus musculus GN=Zc3h15 PE=1 SV=2	48423.5	5	16.2		2		2.473e-07
D3Z5I1	D3Z5I1	Zinc finger CCCH-type antiviral protein 1 OS=Mus musculus GN=Zc3hav1 PE=1 SV=1	112749	9	17.1		2.98		8.081e-08
P63325	RS10	40S ribosomal protein S10 OS=Mus musculus GN=Rps10 PE=1 SV=1	18939.8	2	15.6	1	1	1.667e-07	4.436e-08
P60867	RS20	40S ribosomal protein S20 OS=Mus musculus GN=Rps20 PE=1 SV=1	13382.3	3	25.2		2		9.218e-07
P47955	RLA1	60S acidic ribosomal protein P1 OS=Mus musculus GN=Rplp1 PE=1 SV=1	11485.7	3	79.8		1		3.273e-07
P62830	RL23	60S ribosomal protein L23 OS=Mus musculus GN=Rpl23 PE=1 SV=1	14892.1	3	37.9	1	2	3.19e-07	5.732e-07
Q3TZR9	Q3TZR9	Activating transcription factor 7, isoform CRA_a OS=Mus musculus GN=Atf7 PE=1 SV=1	51891.4	4	15.5		0.99		7.619e-08
B2RWU7	B2RWU7	AI607873 protein OS=Mus musculus GN=Ifi207 PE=2 SV=1	108002	4	6.8		2		7.305e-08
Q91VK1	BZW2	Basic leucine zipper and W2 domain-containing protein 2 OS=Mus musculus GN=Bzw2 PE=1 SV=1	42854.5	3	9.4		1.98		2.36e-07
Q60967	PAPS1	Bifunctional 3'-phosphoadenosine 5'-phosphosulfate synthase 1 OS=Mus musculus GN=Papss1 PE=1 SV=1	68630.7	5	12.1		1.98		2.83e-07
Q3V1V3	ESF1	ESF1 homolog OS=Mus musculus GN=Esf1 PE=1 SV=1	98234.8	5	9		2		5.405e-08
Q9Z2B5	E2AK3	Eukaryotic translation initiation factor 2-alpha kinase 3 OS=Mus musculus GN=Eif2ak3 PE=1 SV=1	124901	9	11		5		1.657e-07
Q9D0M0	EXOS7	Exosome complex exonuclease RRP42 OS=Mus musculus GN=Exosc7 PE=1 SV=2	31878.1	5	24.1		2.98		6.538e-07
Q920E5	FPPS	Farnesyl pyrophosphate synthase OS=Mus musculus GN=Fdps PE=1 SV=1	40629.8	5	47.9		3		2.09e-07
E9QKD9	E9QKD9	General transcription factor IIH subunit 1 OS=Mus musculus GN=Gtf2h1 PE=1 SV=1	58967.9	4	10.7	1	2	9.27e-08	1.249e-07
Q8BMP6	GCP60	Golgi resident protein GCP60 OS=Mus musculus GN=Acbd3 PE=1 SV=3	60316.9	5	13.9		2		1.29e-07
Q9CRB2	NHP2	H/ACA ribonucleoprotein complex subunit 2 OS=Mus musculus GN=Nhp2 PE=1 SV=1	17272.1	3	23.5	1	1	1.169e-06	2.79e-07
Q03963	E2AK2	Interferon-induced, double-stranded RNA-activated protein kinase OS=Mus musculus GN=Eif2ak2 PE=1 SV=2	58373.5	6	15.3		1		1.223e-07
P56546-2	CTBP2	Isoform 2 of C-terminal-binding protein 2 OS=Mus musculus GN=Ctbp2	46050.5	7	19.3		1.99		5.635e-08
Q60760-2	GRB10	Isoform 2 of Growth factor receptor-bound protein 10 OS=Mus musculus GN=Grb10	62381.5	4	11.3		1.98		3.966e-08
Q8BWZ3-2	NAA25	Isoform 2 of N-alpha-acetyltransferase 25, NatB auxiliary subunit OS=Mus musculus GN=Naa25	111925	5	5.9		3		8.106e-08
Q921E6-2	EED	Isoform 2 of Polycomb protein EED OS=Mus musculus GN=Eed	24653	4	22.3		3		1.953e-07
Q8C033-2	ARHGA	Isoform 2 of Rho guanine nucleotide exchange factor 10 OS=Mus musculus GN=Arhgef10	148248	4	5.6		1.98		3.687e-08
Q91WJ7-2	SPS2L	Isoform 2 of SPATS2-like protein OS=Mus musculus GN=Spats2l	49539.3	6	19.3	0.99	5.94	2.178e-08	2.966e-07
A0A068BFR6	A0A068BFR6	Kinesin-like protein OS=Mus musculus GN=Kifc1 PE=2 SV=1	74263.4	15	31		2.98		1.209e-07
Q8BX02	KANK2	KN motif and ankyrin repeat domain-containing protein 2 OS=Mus musculus GN=Kank2 PE=1 SV=1	90441.7	6	10.2		3		1.655e-07
P60670	NPL4	Nuclear protein localization protein 4 homolog OS=Mus musculus GN=Nploc4 PE=1 SV=3	68173.1	6	16.8		1.98		8.194e-08
Q9CPP0	NPM3	Nucleoplasmin-3 OS=Mus musculus GN=Npm3 PE=1 SV=3	19077.3	3	29.7		1		4.103e-07
P30416	FKBP4	Peptidyl-prolyl cis-trans isomerase FKBP4 OS=Mus musculus GN=Fkbp4 PE=1 SV=5	51666	7	19.4	1	3	5.044e-08	2.417e-07
E9QJV4	E9QJV4	Pre-mRNA-processing factor 39 OS=Mus musculus GN=Prpf39 PE=1 SV=1	78073.4	4	7.2		3.97		9.999e-08
Q61398	PCOC1	Procollagen C-endopeptidase enhancer 1 OS=Mus musculus GN=Pcolce PE=1 SV=2	50330.2	3	19.5		2		1.214e-07
Q8K0G5	TSSC1	Protein TSSC1 OS=Mus musculus GN=Eipr1 PE=1 SV=2	43208.1	4	11.9		4		4.691e-07
Q8R361	RFIP5	Rab11 family-interacting protein 5 OS=Mus musculus GN=Rab11fip5 PE=1 SV=2	143218	6	16.6		3		1.785e-07
P07742	RIR1	Ribonucleoside-diphosphate reductase large subunit OS=Mus musculus GN=Rrm1 PE=1 SV=2	90327.6	5	11.2		2		6.652e-08
Q9Z2B9	KS6A4	Ribosomal protein S6 kinase alpha-4 OS=Mus musculus GN=Rps6ka4 PE=1 SV=2	85814.5	4	7.1		3		1.495e-07
Q9R0P3	ESTD	S-formylglutathione hydrolase OS=Mus musculus GN=Esd PE=1 SV=1	28607.1	5	35.6	1	2	1.497e-07	2.303e-07
A2A5V2	A2A5V2	SH3 domain-binding protein 1 OS=Mus musculus GN=Sh3bp1 PE=1 SV=1	64652.7	5	10.1		1.98		8.027e-08
Q9CWK8	SNX2	Sorting nexin-2 OS=Mus musculus GN=Snx2 PE=1 SV=2	58560.9	5	13.9		4		5.322e-07
Q80XQ2	TBCD5	TBC1 domain family member 5 OS=Mus musculus GN=Tbc1d5 PE=1 SV=2	92657.4	5	8.8		1.98		1.479e-07
O08811	ERCC2	TFIIH basal transcription factor complex helicase XPD subunit OS=Mus musculus GN=Ercc2 PE=1 SV=2	84578.8	5	15		2		9.227e-08
Q5U4D9	THOC6	THO complex subunit 6 homolog OS=Mus musculus GN=Thoc6 PE=1 SV=1	32765.6	4	21.3		1.98		2.438e-07
P09450	JUNB	Transcription factor jun-B OS=Mus musculus GN=Junb PE=1 SV=1	35833.2	4	23		1.98		3.042e-07
Q6P5E4	UGGG1	UDP-glucose:glycoprotein glucosyltransferase 1 OS=Mus musculus GN=Uggt1 PE=1 SV=4	176773	5	7.5		1		1.981e-08
Q6NZF1	ZC11A	Zinc finger CCCH domain-containing protein 11A OS=Mus musculus GN=Zc3h11a PE=1 SV=1	80493.9	7	14.1		2.96		1.655e-07
Q6ZPZ3	ZC3H4	Zinc finger CCCH domain-containing protein 4 OS=Mus musculus GN=Zc3h4 PE=1 SV=2	136298	8	13.6		3		4.42e-08
Q6ZWN5	RS9	40S ribosomal protein S9 OS=Mus musculus GN=Rps9 PE=1 SV=3	22631.6	6	27.8		1		3.266e-07
P62889	RL30	60S ribosomal protein L30 OS=Mus musculus GN=Rpl30 PE=1 SV=2	12721.7	2	24.6		2		6.302e-07
Q99LE6	ABCF2	ATP-binding cassette sub-family F member 2 OS=Mus musculus GN=Abcf2 PE=1 SV=1	71947.9	5	10		3		2.235e-07
O08529	CAN2	Calpain-2 catalytic subunit OS=Mus musculus GN=Capn2 PE=1 SV=4	80021.8	4	5.9	0.99	1.98	1.549e-08	5.904e-08
Q6A065	CE170	Centrosomal protein of 170 kDa OS=Mus musculus GN=Cep170 PE=1 SV=2	174308	8	6.2	0.99	2.97	7.822e-09	5.125e-08
Q6PDL0	DC1L2	Cytoplasmic dynein 1 light intermediate chain 2 OS=Mus musculus GN=Dync1li2 PE=1 SV=2	54328.7	4	11.2		3.99		3.295e-07
P37913	DNLI1	DNA ligase 1 OS=Mus musculus GN=Lig1 PE=1 SV=2	102454	4	7		3		9.567e-08
P97760	RPB3	DNA-directed RNA polymerase II subunit RPB3 OS=Mus musculus GN=Polr2c PE=1 SV=2	48455.2	4	25.5		0.99		1.017e-07
Q91WN1	DNJC9	DnaJ homolog subfamily C member 9 OS=Mus musculus GN=Dnajc9 PE=1 SV=2	30112.3	3	13.1		3		5.212e-07
Q8BL66	EEA1	Early endosome antigen 1 OS=Mus musculus GN=Eea1 PE=1 SV=2	161231	7	6.2		3.99		4.007e-08
Q8BTW3	EXOS6	Exosome complex component MTR3 OS=Mus musculus GN=Exosc6 PE=1 SV=1	28424.6	5	27.8		2		1.824e-07
Q7TQK4	EXOS3	Exosome complex component RRP40 OS=Mus musculus GN=Exosc3 PE=1 SV=3	30098.7	2	19.3		1		9.651e-08
Q6ZQ03	FNBP4	Formin-binding protein 4 OS=Mus musculus GN=Fnbp4 PE=1 SV=2	116545	6	7.5		2		2.869e-08
O70422	TF2H4	General transcription factor IIH subunit 4 OS=Mus musculus GN=Gtf2h4 PE=1 SV=1	52317.4	4	13.8		1.99		1.16e-07
Q9R062	GLYG	Glycogenin-1 OS=Mus musculus GN=Gyg1 PE=1 SV=3	37468.4	6	25.8		2.98		4.45e-07
Q8VH37	HDAC8	Histone deacetylase 8 OS=Mus musculus GN=Hdac8 PE=1 SV=2	41852.8	3	11.7		2		1.57e-07
Q8VD75	HIP1	Huntingtin-interacting protein 1 OS=Mus musculus GN=Hip1 PE=1 SV=2	115436	7	10.3		3		7.67e-08
Q9D819	IPYR	Inorganic pyrophosphatase OS=Mus musculus GN=Ppa1 PE=1 SV=1	32718.2	4	16.3		1.98		1.245e-07
Q9JMD0-2	ZN207	Isoform 2 of BUB3-interacting and GLEBS motif-containing protein ZNF207 OS=Mus musculus GN=Znf207	52902.2	3	7.2		1.98		2.675e-07
Q8K202-2	RPA49	Isoform 2 of DNA-directed RNA polymerase I subunit RPA49 OS=Mus musculus GN=Polr1e	48959	6	16.5		3		3.317e-07
Q5SNZ0-2	GRDN	Isoform 2 of Girdin OS=Mus musculus GN=Ccdc88a	216344	8	7.4		2		1.903e-08
Q9D786-2	HAUS5	Isoform 2 of HAUS augmin-like complex subunit 5 OS=Mus musculus GN=Haus5	69709.3	3	8.9		3		1.433e-07
Q5SVQ0-2	KAT7	Isoform 2 of Histone acetyltransferase KAT7 OS=Mus musculus GN=Kat7	67783.8	4	9.6		1		3.507e-08
O08539-2	BIN1	Isoform 2 of Myc box-dependent-interacting protein 1 OS=Mus musculus GN=Bin1	52857.5	4	15		3		1.757e-07
Q62417-2	SRBS1	Isoform 2 of Sorbin and SH3 domain-containing protein 1 OS=Mus musculus GN=Sorbs1	143361	4	8.9		2		1.048e-07
Q99PP7-2	TRI33	Isoform Beta of E3 ubiquitin-protein ligase TRIM33 OS=Mus musculus GN=Trim33	123921	4	7.1		1		4.141e-08
Q9WUK2-2	IF4H	Isoform Short of Eukaryotic translation initiation factor 4H OS=Mus musculus GN=Eif4h	25508.7	3	20.2	1	3	1.464e-07	5.446e-07
Q3UM18	LSG1	Large subunit GTPase 1 homolog OS=Mus musculus GN=Lsg1 PE=1 SV=2	73291.1	4	6.7		2		6.926e-08
P48377	RFX1	MHC class II regulatory factor RFX1 OS=Mus musculus GN=Rfx1 PE=1 SV=2	103956	4	8.2		2		7.866e-08
P06801	MAOX	NADP-dependent malic enzyme OS=Mus musculus GN=Me1 PE=1 SV=2	63961.1	3	10.9		1		8.147e-08
Q8CI51	PDLI5	PDZ and LIM domain protein 5 OS=Mus musculus GN=Pdlim5 PE=1 SV=4	63421.2	18	45.2		0.99		7.137e-08
O08807	PRDX4	Peroxiredoxin-4 OS=Mus musculus GN=Prdx4 PE=1 SV=1	31105.2	6	32.8		1		1.816e-07
Q9CQJ2	PIHD1	PIH1 domain-containing protein 1 OS=Mus musculus GN=Pih1d1 PE=1 SV=1	32260.3	3	15.9		1		8.244e-08
P63005	LIS1	Platelet-activating factor acetylhydrolase IB subunit alpha OS=Mus musculus GN=Pafah1b1 PE=1 SV=2	46748.2	6	18.3		1		8.289e-08
Q8VDG3	PARN	Poly(A)-specific ribonuclease PARN OS=Mus musculus GN=Parn PE=1 SV=1	71710	3	6.7		1		5.505e-08
Q8C1D8	IWS1	Protein IWS1 homolog OS=Mus musculus GN=Iws1 PE=1 SV=1	85468.4	5	8.4	1	1	2.689e-08	5.3e-08
Q99K43	PRC1	Protein regulator of cytokinesis 1 OS=Mus musculus GN=Prc1 PE=1 SV=2	61836.1	4	10.5		1		5.016e-08
A2AIV2	VIR	Protein virilizer homolog OS=Mus musculus GN=Kiaa1429 PE=1 SV=1	207599	5	3.8		2		1.69e-08
Q3TA68	Q3TA68	Putative uncharacterized protein OS=Mus musculus GN=Wdr36 PE=1 SV=1	99909.3	5	8.4		1.98		9.444e-08
Q8R4X3	RBM12	RNA-binding protein 12 OS=Mus musculus GN=Rbm12 PE=1 SV=3	71287.8	3	7		2.97		1.173e-07
Q8BKX6	SMG1	Serine/threonine-protein kinase SMG1 OS=Mus musculus GN=Smg1 PE=1 SV=3	410591	15	5.7		1		4.547e-09
Q6P1F6	2ABA	Serine/threonine-protein phosphatase 2A 55 kDa regulatory subunit B alpha isoform OS=Mus musculus GN=Ppp2r2a PE=1 SV=1	42686.8	5	15.5		3		2.955e-07
Q60854	SPB6	Serpin B6 OS=Mus musculus GN=Serpinb6 PE=1 SV=1	17050.4	4	35.4		0.99		8.453e-08
Q3UMC0	SPAT5	Spermatogenesis-associated protein 5 OS=Mus musculus GN=Spata5 PE=1 SV=2	97459	7	11.3	1	3	4.247e-08	4.213e-08
Q64674	SPEE	Spermidine synthase OS=Mus musculus GN=Srm PE=1 SV=1	34086.8	2	8.3	1	1	8.534e-08	5.92e-08
B2RQS1	B2RQS1	Striatin-3 OS=Mus musculus GN=Strn3 PE=1 SV=1	77881.8	4	9.7		2		9.716e-08
Q924W5	SMC6	Structural maintenance of chromosomes protein 6 OS=Mus musculus GN=Smc6 PE=1 SV=1	127442	5	7.5		3		4.961e-08
Q8CDN6	TXNL1	Thioredoxin-like protein 1 OS=Mus musculus GN=Txnl1 PE=1 SV=3	33553.3	2	10		2		3.135e-07
O89090	SP1	Transcription factor Sp1 OS=Mus musculus GN=Sp1 PE=1 SV=2	80628.6	3	9.6		2		8.73e-08
Q3TX08	TRM1	tRNA (guanine(26)-N(2))-dimethyltransferase OS=Mus musculus GN=Trmt1 PE=1 SV=2	68217.5	5	11.4		1		1.993e-08
O88413	TULP3	Tubby-related protein 3 OS=Mus musculus GN=Tulp3 PE=1 SV=1	51324.8	3	17.2		1		6.905e-08
P35235	PTN11	Tyrosine-protein phosphatase non-receptor type 11 OS=Mus musculus GN=Ptpn11 PE=1 SV=2	68579.5	5	12.9	0.99	1.99	5.098e-08	5.875e-08
Q9ES00	UBE4B	Ubiquitin conjugation factor E4 B OS=Mus musculus GN=Ube4b PE=1 SV=3	135070	6	12.3		3		4.773e-08
Q3TW96	UAP1L	UDP-N-acetylhexosamine pyrophosphorylase-like protein 1 OS=Mus musculus GN=Uap1l1 PE=1 SV=1	56980.9	4	7.5		1.98		2.207e-07
A6X8J1	A6X8J1	Uncharacterized protein OS=Mus musculus GN=Gm16405 PE=4 SV=1	18045.4	3	35.5		2		2.404e-07
Q8R1N0	ZN830	Zinc finger protein 830 OS=Mus musculus GN=Znf830 PE=1 SV=1	40741.6	5	28.9		4		1.534e-07
P70290	EM55	55 kDa erythrocyte membrane protein OS=Mus musculus GN=Mpp1 PE=1 SV=1	47796.4	2	6.1		1		1.79e-07
Q5EG47	AAPK1	5'-AMP-activated protein kinase catalytic subunit alpha-1 OS=Mus musculus GN=Prkaa1 PE=1 SV=2	62850	2	4.9		1		1.017e-07
P84099	RL19	60S ribosomal protein L19 OS=Mus musculus GN=Rpl19 PE=1 SV=1	23505.3	2	13.4	1	2	4.594e-07	9.546e-07
Q9D8S3	ARFG3	ADP-ribosylation factor GTPase-activating protein 3 OS=Mus musculus GN=Arfgap3 PE=1 SV=2	57651.3	5	12		1		4.897e-08
Q8BGQ7	SYAC	Alanine--tRNA ligase, cytoplasmic OS=Mus musculus GN=Aars PE=1 SV=1	107187	5	7.1	0.99	2	2.489e-08	5.46e-08
P45376	ALDR	Aldose reductase OS=Mus musculus GN=Akr1b1 PE=1 SV=3	35813.5	5	14.5	1	2	8.578e-08	1.785e-07
P22892	AP1G1	AP-1 complex subunit gamma-1 OS=Mus musculus GN=Ap1g1 PE=1 SV=3	76897.8	3	6		2		1.698e-07
P35585	AP1M1	AP-1 complex subunit mu-1 OS=Mus musculus GN=Ap1m1 PE=1 SV=3	48638.1	5	18.4		1		9.666e-08
Q8K3W0	BRE	BRCA1-A complex subunit BRE OS=Mus musculus GN=Bre PE=1 SV=2	43830	3	9.9	0.99	2.97	2.138e-07	2.545e-07
P0DP26	CALM1	Calmodulin-1 OS=Mus musculus GN=Calm1 PE=1 SV=1	16862.9	3	26.2	0.99	0.99	3.153e-07	1.629e-07
Q8BRN9	C2D1B	Coiled-coil and C2 domain-containing protein 1B OS=Mus musculus GN=Cc2d1b PE=1 SV=1	85552.2	6	13.2		2		5.415e-08
Q9CQJ6	DENR	Density-regulated protein OS=Mus musculus GN=Denr PE=1 SV=1	22206.2	3	21.7		2		2.899e-07
Q62188	DPYL3	Dihydropyrimidinase-related protein 3 OS=Mus musculus GN=Dpysl3 PE=1 SV=1	61903.1	11	28.7		4.94		3.642e-07
Q6PNC0	DMXL1	DmX-like protein 1 OS=Mus musculus GN=Dmxl1 PE=1 SV=1	338081	3	1.4		2		1.494e-08
Q6KAR6	EXOC3	Exocyst complex component 3 OS=Mus musculus GN=Exoc3 PE=1 SV=2	86615.7	4	4.9	1	2	2.323e-08	1.176e-07
O35382	EXOC4	Exocyst complex component 4 OS=Mus musculus GN=Exoc4 PE=1 SV=2	110992	4	5.9		1.98		5.988e-08
Q6PGF7	EXOC8	Exocyst complex component 8 OS=Mus musculus GN=Exoc8 PE=1 SV=1	81182.3	4	10.5		1		3.02e-08
Q9CY66-2	GAR1	Isoform 2 of H/ACA ribonucleoprotein complex subunit 1 OS=Mus musculus GN=Gar1	23555.7	4	16.2		1		2.466e-07
Q811L6-2	MAST4	Isoform 2 of Microtubule-associated serine/threonine-protein kinase 4 OS=Mus musculus GN=Mast4	266596	2	2.7		1		1.489e-08
P70255-2	NFIC	Isoform 2 of Nuclear factor 1 C-type OS=Mus musculus GN=Nfic	47871.4	6	20.2		0.99		5.464e-08
P25799-2	NFKB1	Isoform 2 of Nuclear factor NF-kappa-B p105 subunit OS=Mus musculus GN=Nfkb1	105837	6	11.1		0.99		2.716e-08
Q7TNC4-2	LC7L2	Isoform 2 of Putative RNA-binding protein Luc7-like 2 OS=Mus musculus GN=Luc7l2	45485.1	7	27.6		2		1.885e-07
O35551-2	RABE1	Isoform 2 of Rab GTPase-binding effector protein 1 OS=Mus musculus GN=Rabep1	99714.5	3	5.9		0.99		3.386e-08
Q91W59-2	RBMS1	Isoform 2 of RNA-binding motif, single-stranded-interacting protein 1 OS=Mus musculus GN=Rbms1	40155.7	3	18.1		0.99		5.008e-08
Q8C650-2	SEPT10	Isoform 2 of Septin-10 OS=Mus musculus GN=Sept10	49923	5	15.2		2		8.45e-08
Q8VBT9-2	ASPC1	Isoform 2 of Tether containing UBX domain for GLUT4 OS=Mus musculus GN=Aspscr1	59920.9	7	38.5		2.99		1.213e-07
Q8BX70-2	VP13C	Isoform 2 of Vacuolar protein sorting-associated protein 13C OS=Mus musculus GN=Vps13c	420941	8	2.8		4		2.832e-08
Q9Z0H3-2	SNF5	Isoform B of SWI/SNF-related matrix-associated actin-dependent regulator of chromatin subfamily B member 1 OS=Mus musculus GN=Smarcb1	31876	3	12.8		2		2.206e-07
Q63844	MK03	Mitogen-activated protein kinase 3 OS=Mus musculus GN=Mapk3 PE=1 SV=5	42483	5	17.1	1	1.98	9.458e-08	1.79e-07
Q69ZX6	MOR2A	MORC family CW-type zinc finger protein 2A OS=Mus musculus GN=Morc2a PE=1 SV=2	110549	2	2		1		3.364e-08
E9Q2B2	E9Q2B2	Nuclear receptor corepressor 1 OS=Mus musculus GN=Ncor1 PE=1 SV=1	271342	4	3.4		1.98		1.036e-08
Q80YV2	NIPA	Nuclear-interacting partner of ALK OS=Mus musculus GN=Zc3hc1 PE=1 SV=1	55345.1	6	19.2	0.98	2.96	3.014e-08	9.93e-08
Q9DBX2	PHLP	Phosducin-like protein OS=Mus musculus GN=Pdcl PE=1 SV=1	34446.9	3	15.6		1.98		1.615e-07
Q8R3C6	RBM19	Probable RNA-binding protein 19 OS=Mus musculus GN=Rbm19 PE=1 SV=1	96847.2	4	6.6		3		7.431e-08
Q8QZV7	ASUN	Protein asunder homolog OS=Mus musculus GN=Asun PE=1 SV=2	82943.8	5	8.2		3		1.329e-07
Q8CE86	Q8CE86	Putative uncharacterized protein OS=Mus musculus GN=Tbl3 PE=2 SV=1	86768.7	3	6.9		0.5		1.635e-08
Q9D828	Q9D828	Putative uncharacterized protein OS=Mus musculus GN=Tfg PE=2 SV=1	43102	3	18.5		1.98		3.626e-07
Q3ULL6	Q3ULL6	Putative uncharacterized protein OS=Mus musculus GN=Upf3b PE=1 SV=1	27712.3	2	7.8		1.98		1.105e-07
P34022	RANG	Ran-specific GTPase-activating protein OS=Mus musculus GN=Ranbp1 PE=1 SV=2	23635.7	4	34.5		1.99		4.694e-07
Q99K70	RRAGC	Ras-related GTP-binding protein C OS=Mus musculus GN=Rragc PE=1 SV=1	44200.8	4	10.6		2		9.904e-08
Q61599	GDIR2	Rho GDP-dissociation inhibitor 2 OS=Mus musculus GN=Arhgdib PE=1 SV=3	22890.5	3	36		1		2.006e-07
O88746	TOM1	Target of Myb protein 1 OS=Mus musculus GN=Tom1 PE=1 SV=1	54435.3	5	17.1	1	1	3.508e-08	3.268e-08
Q9DCD5	TJAP1	Tight junction-associated protein 1 OS=Mus musculus GN=Tjap1 PE=1 SV=1	60644.7	3	9.3		2		1.392e-07
Q8BU11	TOX4	TOX high mobility group box family member 4 OS=Mus musculus GN=Tox4 PE=1 SV=3	66769.4	2	5.8		2		1.492e-07
Q8C4J7	TBL3	Transducin beta-like protein 3 OS=Mus musculus GN=Tbl3 PE=2 SV=1	88444.3	3	6.7		0.5		1.604e-08
Q62351	TFR1	Transferrin receptor protein 1 OS=Mus musculus GN=Tfrc PE=1 SV=1	57449.1	4	9.7		2		3.187e-08
Q6PFR5	TRA2A	Transformer-2 protein homolog alpha OS=Mus musculus GN=Tra2a PE=1 SV=1	24709.4	3	19.8		1		2.059e-07
P62996	TRA2B	Transformer-2 protein homolog beta OS=Mus musculus GN=Tra2b PE=1 SV=1	26723.3	5	35.1		2		4.38e-07
Q640M1	UT14A	U3 small nucleolar RNA-associated protein 14 homolog A OS=Mus musculus GN=Utp14a PE=1 SV=1	32132.3	3	14.8	0.99	0.99	2.961e-07	1.155e-07
Q9JMA1	UBP14	Ubiquitin carboxyl-terminal hydrolase 14 OS=Mus musculus GN=Usp14 PE=1 SV=3	52326.3	3	8.1		2		2.425e-07
B1AZA0	B1AZA0	Uncharacterized protein OS=Mus musculus GN=Gm14525 PE=4 SV=1	24680.4	3	24.1		2.97		2.715e-07
P13439	UMPS	Uridine 5'-monophosphate synthase OS=Mus musculus GN=Umps PE=1 SV=3	52403.4	4	11.4		1		3.902e-08
P29533	VCAM1	Vascular cell adhesion protein 1 OS=Mus musculus GN=Vcam1 PE=1 SV=1	81495.6	4	6.8		3		1.068e-07
Q0P678	ZCH18	Zinc finger CCCH domain-containing protein 18 OS=Mus musculus GN=Zc3h18 PE=1 SV=1	106349	2	3.5		1		2.013e-08
Q7TMF2	ERI1	3'-5' exoribonuclease 1 OS=Mus musculus GN=Eri1 PE=1 SV=2	39616.1	3	14.8		2		2.17e-07
P62858	RS28	40S ribosomal protein S28 OS=Mus musculus GN=Rps28 PE=1 SV=1	7854.21	2	41.1		2		1.662e-06
Q9CZM2	RL15	60S ribosomal protein L15 OS=Mus musculus GN=Rpl15 PE=2 SV=4	24185.1	5	22.5		3		7.448e-07
Q8BP67	RL24	60S ribosomal protein L24 OS=Mus musculus GN=Rpl24 PE=1 SV=2	18277.1	3	19.1		1		2.064e-07
P28658	ATX10	Ataxin-10 OS=Mus musculus GN=Atxn10 PE=1 SV=2	53802.6	3	8.8		2		6.239e-08
Q61235	SNTB2	Beta-2-syntrophin OS=Mus musculus GN=Sntb2 PE=1 SV=2	56490.3	2	4.2		2		6.351e-08
P23780	BGAL	Beta-galactosidase OS=Mus musculus GN=Glb1 PE=1 SV=1	60798	5	9.9		1		8.422e-08
Q9JMK2	KC1E	Casein kinase I isoform epsilon OS=Mus musculus GN=Csnk1e PE=1 SV=2	47400.3	8	28.6	0.99	0.99	1.195e-07	5.331e-08
Q9CXS4	CENPV	Centromere protein V OS=Mus musculus GN=Cenpv PE=1 SV=2	27595.9	3	21.4		2		1.537e-07
Q8VHY0	CSPG4	Chondroitin sulfate proteoglycan 4 OS=Mus musculus GN=Cspg4 PE=1 SV=3	252838	2	1.5		1		7.653e-09
Q8BT60	CPNE3	Copine-3 OS=Mus musculus GN=Cpne3 PE=1 SV=2	59721	3	5.8	0.99	0.99	3.158e-07	5.697e-08
A2AF47	DOC11	Dedicator of cytokinesis protein 11 OS=Mus musculus GN=Dock11 PE=1 SV=1	218663	5	4		2.55		3.596e-08
Q8BTT6	DIEXF	Digestive organ expansion factor homolog OS=Mus musculus GN=Diexf PE=2 SV=2	88462.4	3	4.4		1		5.003e-08
Q8BVG4	DPP9	Dipeptidyl peptidase 9 OS=Mus musculus GN=Dpp9 PE=1 SV=2	98191	5	7		2		6.451e-08
Q78WZ7	RPA43	DNA-directed RNA polymerase I subunit RPA43 OS=Mus musculus GN=Twistnb PE=1 SV=1	36788.4	4	16.1		1		7.939e-08
B2RXC6	B2RXC6	DNA-directed RNA polymerase subunit OS=Mus musculus GN=Polr3a PE=1 SV=1	156052	7	8.9		0.97		3.316e-08
Q2Q7P0	Q2Q7P0	ENH1 OS=Mus musculus GN=Pdlim5 PE=2 SV=1	63422.2	16	40.4		3		6.147e-08
B1AUN2	B1AUN2	Eukaryotic translation initiation factor 2B, subunit 3 OS=Mus musculus GN=Eif2b3 PE=1 SV=1	49896	5	16		2.97		1.217e-07
Q3TPX4	EXOC5	Exocyst complex component 5 OS=Mus musculus GN=Exoc5 PE=1 SV=2	81894.9	6	11		3		1.301e-07
Q9D4H2	GCC1	GRIP and coiled-coil domain-containing protein 1 OS=Mus musculus GN=Gcc1 PE=1 SV=2	87840.4	4	7.1		2		8.877e-08
Q5PRF0	HTR5A	HEAT repeat-containing protein 5A OS=Mus musculus GN=Heatr5a PE=1 SV=2	220348	5	3.1		2		3.14e-08
P17156	HSP72	Heat shock-related 70 kDa protein 2 OS=Mus musculus GN=Hspa2 PE=1 SV=2	69778.8	18	30.6		3		1.341e-07
Q6P4S8	INT1	Integrator complex subunit 1 OS=Mus musculus GN=Ints1 PE=1 SV=2	248205	4	2.6		3		4.611e-08
Q9R002	IFI2	Interferon-activable protein 202 OS=Mus musculus GN=Ifi202 PE=1 SV=3	50493.4	3	13.9	1	1	9.782e-08	6.036e-08
Q91WR3-2	ASCC2	Isoform 2 of Activating signal cointegrator 1 complex subunit 2 OS=Mus musculus GN=Ascc2	83859.9	4	6.3		1		5.473e-08
Q9Z148-2	EHMT2	Isoform 2 of Histone-lysine N-methyltransferase EHMT2 OS=Mus musculus GN=Ehmt2	134993	6	11.4		1.98		5.251e-08
Q60680-2	IKKA	Isoform 2 of Inhibitor of nuclear factor kappa-B kinase subunit alpha OS=Mus musculus GN=Chuk	84932.4	3	9.8		2		1.08e-07
Q9JK30-2	ORC3	Isoform 2 of Origin recognition complex subunit 3 OS=Mus musculus GN=Orc3	82505.5	3	4.1		2		9.246e-08
Q9Z0P4-2	PALM	Isoform 2 of Paralemmin-1 OS=Mus musculus GN=Palm	36805.3	3	21.6		2.98		1.752e-07
Q4VAA2-2	CDV3	Isoform 2 of Protein CDV3 OS=Mus musculus GN=Cdv3	24235.6	2	13.2		0.99		1.705e-07
Q9QYS9-2	QKI	Isoform 2 of Protein quaking OS=Mus musculus GN=Qki	37736.8	3	12.9		3		5.79e-07
Q99M28-2	RNPS1	Isoform 2 of RNA-binding protein with serine-rich domain 1 OS=Mus musculus GN=Rnps1	40972.7	2	7.8		1		1.882e-07
O70589-3	CSKP	Isoform 3 of Peripheral plasma membrane protein CASK OS=Mus musculus GN=Cask	100376	5	6.3	0.99	1.98	4.438e-08	8.8e-08
P97807-2	FUMH	Isoform Cytoplasmic of Fumarate hydratase, mitochondrial OS=Mus musculus GN=Fh	54466.2	2	5.8	1	2	1.375e-07	7.402e-08
B9EKS2	B9EKS2	Jumonji domain containing 1B OS=Mus musculus GN=Kdm3b PE=1 SV=1	191863	3	2.3		1.98		1.863e-08
Q99JW4	LIMS1	LIM and senescent cell antigen-like-containing domain protein 1 OS=Mus musculus GN=Lims1 PE=1 SV=3	45670.9	2	7.7		1		2.052e-07
Q8BTZ7	GMPPB	Mannose-1-phosphate guanyltransferase beta OS=Mus musculus GN=Gmppb PE=1 SV=1	39980.7	2	10.6		1		3.027e-07
Q61532	MK06	Mitogen-activated protein kinase 6 OS=Mus musculus GN=Mapk6 PE=1 SV=3	82345.8	2	4.4		1		3.867e-08
Q9DB96	NGDN	Neuroguidin OS=Mus musculus GN=Ngdn PE=1 SV=1	35726.9	2	10.5		2		1.277e-07
Q9EQC5	SCYL1	N-terminal kinase-like protein OS=Mus musculus GN=Scyl1 PE=1 SV=1	87810.4	3	6.5		1		4.363e-08
Q60862	ORC2	Origin recognition complex subunit 2 OS=Mus musculus GN=Orc2 PE=1 SV=1	60523.1	3	8		1		1.092e-08
Q91VJ5	PQBP1	Polyglutamine-binding protein 1 OS=Mus musculus GN=Pqbp1 PE=1 SV=1	30651.1	2	12.9		1		2.054e-07
Q8BKS9	PUM3	Pumilio homolog 3 OS=Mus musculus GN=Pum3 PE=1 SV=2	73065	2	3.6		2		9.408e-08
Q9DCC4	P5CR3	Pyrroline-5-carboxylate reductase 3 OS=Mus musculus GN=Pycrl PE=1 SV=2	28774.8	2	10.9		1		3.031e-07
Q8R1F9	RPP40	Ribonuclease P protein subunit p40 OS=Mus musculus GN=Rpp40 PE=2 SV=2	39186.7	6	20.6		1		1.408e-07
Q9CPS7	PNO1	RNA-binding protein PNO1 OS=Mus musculus GN=Pno1 PE=1 SV=1	27508.6	3	17.7		1		3.995e-08
Q8K1R7	NEK9	Serine/threonine-protein kinase Nek9 OS=Mus musculus GN=Nek9 PE=1 SV=2	109289	3	4.5		3		6.943e-08
Q9CZ91	SRFB1	Serum response factor-binding protein 1 OS=Mus musculus GN=Srfbp1 PE=1 SV=1	48842.1	2	8.6		1		9.597e-08
E9PZM7	E9PZM7	SR-related CTD-associated factor 11 OS=Mus musculus GN=Scaf11 PE=1 SV=1	129004	4	8.2		1.98		5.704e-08
Q9WUD1	CHIP	STIP1 homology and U box-containing protein 1 OS=Mus musculus GN=Stub1 PE=1 SV=1	34979.3	2	8.9		1		1.225e-07
Q80XJ3	TTC28	Tetratricopeptide repeat protein 28 OS=Mus musculus GN=Ttc28 PE=1 SV=3	271320	6	3.8		2		2.562e-08
Q9D0R2	SYTC	Threonine--tRNA ligase, cytoplasmic OS=Mus musculus GN=Tars PE=1 SV=2	53716.2	2	4.8		1		4.967e-08
Q9Z1Y4	TRIP6	Thyroid receptor-interacting protein 6 OS=Mus musculus GN=Trip6 PE=1 SV=1	50823.8	3	19		1		1.117e-07
Q3TLI0	TPC10	Trafficking protein particle complex subunit 10 OS=Mus musculus GN=Trappc10 PE=1 SV=2	141763	5	6.9		3		4.044e-08
Q810V0	MPP10	U3 small nucleolar ribonucleoprotein protein MPP10 OS=Mus musculus GN=Mphosph10 PE=1 SV=2	68856.2	3	9.8		3		7.847e-08
P70362	UFD1	Ubiquitin recognition factor in ER-associated degradation protein 1 OS=Mus musculus GN=Ufd1 PE=1 SV=2	34550.4	3	13		1		1.27e-07
Q922Y1	UBXN1	UBX domain-containing protein 1 OS=Mus musculus GN=Ubxn1 PE=1 SV=1	33624.1	4	37.4		3		3.162e-07
Q3TWF6	WDR70	WD repeat-containing protein 70 OS=Mus musculus GN=Wdr70 PE=1 SV=1	73194.9	4	8.2		1		6.124e-08
Q91VY9	ZN622	Zinc finger protein 622 OS=Mus musculus GN=Znf622 PE=1 SV=1	53499.3	4	19.4		1		1.244e-07
P62264	RS14	40S ribosomal protein S14 OS=Mus musculus GN=Rps14 PE=1 SV=3	16314.5	2	15.2		1		3.284e-07
Q9CZX8	RS19	40S ribosomal protein S19 OS=Mus musculus GN=Rps19 PE=1 SV=3	16687	2	7.5		1		3.487e-07
O54950	AAKG1	5'-AMP-activated protein kinase subunit gamma-1 OS=Mus musculus GN=Prkag1 PE=1 SV=2	37586.8	3	14.1		1		8.147e-08
P35980	RL18	60S ribosomal protein L18 OS=Mus musculus GN=Rpl18 PE=1 SV=3	21684.3	3	21.3		1.98		6.296e-07
P14115	RL27A	60S ribosomal protein L27a OS=Mus musculus GN=Rpl27a PE=1 SV=5	16631	2	13.5		2		4.456e-07
P47915	RL29	60S ribosomal protein L29 OS=Mus musculus GN=Rpl29 PE=2 SV=2	17624.9	2	20.2		2		5.52e-07
F7CVJ5	F7CVJ5	AHNAK nucleoprotein 2 (Fragment) OS=Mus musculus GN=Ahnak2 PE=1 SV=1	115507	16	73.1		1		3.799e-08
E9PYB0	E9PYB0	AHNAK nucleoprotein 2 (Fragment) OS=Mus musculus GN=Ahnak2 PE=1 SV=8	183000	18	49.9		2		9.993e-09
Q9DB05	SNAA	Alpha-soluble NSF attachment protein OS=Mus musculus GN=Napa PE=1 SV=1	33227.2	2	9.5		2		1.684e-07
A2A5R2	BIG2	Brefeldin A-inhibited guanine nucleotide-exchange protein 2 OS=Mus musculus GN=Arfgef2 PE=1 SV=1	202633	6	4	1	2.51	2.488e-08	3.794e-08
Q9D0N7	CAF1B	Chromatin assembly factor 1 subunit B OS=Mus musculus GN=Chaf1b PE=1 SV=1	63254.8	2	4		1		2.213e-08
Q9QXV1	CBX8	Chromobox protein homolog 8 OS=Mus musculus GN=Cbx8 PE=1 SV=1	39943.8	4	11		2		1.834e-07
Q8C7E9	CSTFT	Cleavage stimulation factor subunit 2 tau variant OS=Mus musculus GN=Cstf2t PE=1 SV=2	65999.6	6	15.8		0.99		2.773e-07
P18760	COF1	Cofilin-1 OS=Mus musculus GN=Cfl1 PE=1 SV=3	24833.8	2	19.3	1	1	5.188e-07	2.735e-07
Q9D4H8	CUL2	Cullin-2 OS=Mus musculus GN=Cul2 PE=1 SV=2	87342	2	3.4		1		3.172e-08
Q9D5V5	CUL5	Cullin-5 OS=Mus musculus GN=Cul5 PE=1 SV=3	40226.2	2	4		1		9.255e-08
P11440	CDK1	Cyclin-dependent kinase 1 OS=Mus musculus GN=Cdk1 PE=1 SV=3	33882.9	5	19.7		0.99		1.171e-07
Q921X6	RPC6	DNA-directed RNA polymerase III subunit RPC6 OS=Mus musculus GN=Polr3f PE=1 SV=1	15799	2	16.3		2		2.139e-07
Q9D1Q6	ERP44	Endoplasmic reticulum resident protein 44 OS=Mus musculus GN=Erp44 PE=1 SV=1	46825.3	3	9.6		2		3.521e-07
Q8BMI0	FBX38	F-box only protein 38 OS=Mus musculus GN=Fbxo38 PE=1 SV=1	134184	4	5.1		2		3.362e-08
Q8BHJ5	TBL1R	F-box-like/WD repeat-containing protein TBL1XR1 OS=Mus musculus GN=Tbl1xr1 PE=1 SV=1	55770.2	5	17.1		0.99		4.501e-08
P42128	FOXK1	Forkhead box protein K1 OS=Mus musculus GN=Foxk1 PE=1 SV=2	75071.4	3	12.8		1		1.719e-08
O70433	FHL2	Four and a half LIM domains protein 2 OS=Mus musculus GN=Fhl2 PE=1 SV=1	32122.6	5	26.2		1		3.839e-08
Q6P5B5	Q6P5B5	Fragile X mental retardation syndrome-related protein 2 OS=Mus musculus GN=Fxr2 PE=1 SV=1	74406.2	12	28.9		1		3.8e-08
Q01721	GAS1	Growth arrest-specific protein 1 OS=Mus musculus GN=Gas1 PE=2 SV=2	40457.6	2	14.6		0.99		1.206e-07
Q6PGH2	HN1L	Hematological and neurological expressed 1-like protein OS=Mus musculus GN=Hn1l PE=1 SV=1	20134	2	15.5		1		1.236e-07
Q61035	SYHC	Histidine--tRNA ligase, cytoplasmic OS=Mus musculus GN=Hars PE=1 SV=2	57651.3	4	6.9		2		9.336e-08
O88844	IDHC	Isocitrate dehydrogenase [NADP] cytoplasmic OS=Mus musculus GN=Idh1 PE=1 SV=2	47641	4	13	1	2.99	1.545e-07	1.867e-07
Q9CZI9-2	AEN	Isoform 2 of Apoptosis-enhancing nuclease OS=Mus musculus GN=Aen	37375.9	2	8.7		0.99		1.192e-07
Q9DBR3-2	ARMC8	Isoform 2 of Armadillo repeat-containing protein 8 OS=Mus musculus GN=Armc8	75551.3	4	13.5		2		1.378e-07
Q9DC28-2	KC1D	Isoform 2 of Casein kinase I isoform delta OS=Mus musculus GN=Csnk1d	49216.2	7	20	1	1	1.158e-07	8.039e-08
Q8C5L3-2	CNOT2	Isoform 2 of CCR4-NOT transcription complex subunit 2 OS=Mus musculus GN=Cnot2	55071.9	2	10.8		1		5.628e-08
P16951-2	ATF2	Isoform 2 of Cyclic AMP-dependent transcription factor ATF-2 OS=Mus musculus GN=Atf2	52421.7	4	22.7		2		1.734e-07
Q3U7R1-2	ESYT1	Isoform 2 of Extended synaptotagmin-1 OS=Mus musculus GN=Esyt1	121803	2	2.7		2		7.65e-08
Q9JMG7-2	HDGR3	Isoform 2 of Hepatoma-derived growth factor-related protein 3 OS=Mus musculus GN=Hdgfrp3	19845.8	3	22.5		1		3.705e-07
Q9WVG6-2	CARM1	Isoform 2 of Histone-arginine methyltransferase CARM1 OS=Mus musculus GN=Carm1	70457.9	4	13		1		5.981e-08
Q8CCP0-2	NEMF	Isoform 2 of Nuclear export mediator factor Nemf OS=Mus musculus GN=Nemf	121418	3	4.3		1		6.985e-09
O54988-2	SLK	Isoform 2 of STE20-like serine/threonine-protein kinase OS=Mus musculus GN=Slk	137990	7	8.7		2		3.075e-08
Q9WUP7-2	UCHL5	Isoform 2 of Ubiquitin carboxyl-terminal hydrolase isozyme L5 OS=Mus musculus GN=Uchl5	25608.7	3	18.2		2		1.785e-07
P17047-2	LAMP2	Isoform LAMP-2B of Lysosome-associated membrane glycoprotein 2 OS=Mus musculus GN=Lamp2	45752.2	3	6.5		2		1.999e-07
P52480-2	KPYM	Isoform M1 of Pyruvate kinase PKM OS=Mus musculus GN=Pkm	58092	40	72.7		1		8.042e-08
D3Z624	D3Z624	Maestro heat-like repeat family member 1 OS=Mus musculus GN=Mroh1 PE=1 SV=2	127586	3	3.4		2		5.861e-08
Q69ZG0	Q69ZG0	MKIAA1574 protein (Fragment) OS=Mus musculus GN=mKIAA1574 PE=4 SV=1	61888.4	3	9.2		1.98		4.378e-08
O08919	NUMBL	Numb-like protein OS=Mus musculus GN=Numbl PE=1 SV=3	60204.5	2	5		2		1.073e-07
Q9Z1N2	ORC1	Origin recognition complex subunit 1 OS=Mus musculus GN=Orc1 PE=1 SV=2	94511.1	4	6.3		2		7.449e-08
Q91XU3	PI42C	Phosphatidylinositol 5-phosphate 4-kinase type-2 gamma OS=Mus musculus GN=Pip4k2c PE=1 SV=1	47432.1	4	10.7		1		5.426e-08
P05622	PGFRB	Platelet-derived growth factor receptor beta OS=Mus musculus GN=Pdgfrb PE=1 SV=1	123181	2	2.1		1		3.259e-08
F7B6A4	F7B6A4	Potassium channel tetramerisation domain-containing 17 (Fragment) OS=Mus musculus GN=Kctd17 PE=1 SV=1	23680.5	17	88.8	1	1	2.339e-06	1.29e-06
A6X919	D19L1	Probable C-mannosyltransferase DPY19L1 OS=Mus musculus GN=Dpy19l1 PE=1 SV=1	84347.9	4	8.4		2		1.163e-07
Q99K95	RTF2	Protein RTF2 homolog OS=Mus musculus GN=Rtfdc1 PE=1 SV=1	34019.3	2	7.9		1		3.869e-08
Q9DB90	SMG9	Protein SMG9 OS=Mus musculus GN=Smg9 PE=1 SV=1	57728.1	4	16.5		3		1.014e-07
Q3UZ28	Q3UZ28	Putative uncharacterized protein OS=Mus musculus GN=Acin1 PE=2 SV=1	17570	2	26.6		1		5.974e-07
Q8CFE3	RCOR1	REST corepressor 1 OS=Mus musculus GN=Rcor1 PE=1 SV=3	43967.5	3	11.3		1		7.608e-08
Q91YM2	RHG35	Rho GTPase-activating protein 35 OS=Mus musculus GN=Arhgap35 PE=1 SV=3	135364	3	2.8		2		2.18e-08
Q9CW46	RAVR1	Ribonucleoprotein PTB-binding 1 OS=Mus musculus GN=Raver1 PE=1 SV=2	50253.1	2	9		1		1.066e-08
A0A087WRI8	A0A087WRI8	RIKEN cDNA 2310022A10 gene OS=Mus musculus GN=2310022A10Rik PE=1 SV=1	44536.5	4	13.8		0.99		1.261e-07
Q8C1A5	THOP1	Thimet oligopeptidase OS=Mus musculus GN=Thop1 PE=1 SV=1	78175.3	2	4.7	1	1	1.094e-07	3.143e-08
P15066	JUND	Transcription factor jun-D OS=Mus musculus GN=Jund PE=1 SV=1	34973.3	3	10.9		1		1.068e-07
Q61782	Q61782	Type I epidermal keratin mRNA, 3'end (Fragment) OS=Mus musculus PE=2 SV=1	10673.4	6	48.4		1		9.504e-07
Q9D906	ATG7	Ubiquitin-like modifier-activating enzyme ATG7 OS=Mus musculus GN=Atg7 PE=1 SV=1	68379.5	3	6.1		1		2.831e-08
P54728	RD23B	UV excision repair protein RAD23 homolog B OS=Mus musculus GN=Rad23b PE=1 SV=2	43308.8	2	8.6	1	1	2.047e-07	5.791e-08
Q5KU39	VPS41	Vacuolar protein sorting-associated protein 41 homolog OS=Mus musculus GN=Vps41 PE=1 SV=1	70477.2	3	5.8		1		4.015e-08
Q8C6G8	WDR26	WD repeat-containing protein 26 OS=Mus musculus GN=Wdr26 PE=1 SV=3	69016.1	4	10.1		1		9.802e-08
Q8R5H6	WASF1	Wiskott-Aldrich syndrome protein family member 1 OS=Mus musculus GN=Wasf1 PE=1 SV=2	61632.9	3	10		2		1.176e-07
Q11136	PEPD	Xaa-Pro dipeptidase OS=Mus musculus GN=Pepd PE=1 SV=3	55137	3	7.1		2		8.731e-08
Q91VW9	ZKSC3	Zinc finger protein with KRAB and SCAN domains 3 OS=Mus musculus GN=Zkscan3 PE=1 SV=1	51938.3	2	11.3		0.99		7.092e-08
P56480	ATPB	ATP synthase subunit beta, mitochondrial OS=Mus musculus GN=Atp5b PE=1 SV=2	56409.6	3	15.1		2		1.879e-07
A2A4P0	DHX8	ATP-dependent RNA helicase DHX8 OS=Mus musculus GN=Dhx8 PE=2 SV=1	145210	3	6.3		1		3.617e-08
Q8R016	BLMH	Bleomycin hydrolase OS=Mus musculus GN=Blmh PE=1 SV=1	20931.4	2	12.8		2		9.344e-08
Q8K2F0	BRD3	Bromodomain-containing protein 3 OS=Mus musculus GN=Brd3 PE=1 SV=2	79912.3	2	5.2		0.99		1.984e-08
Q02248	CTNB1	Catenin beta-1 OS=Mus musculus GN=Ctnnb1 PE=1 SV=1	85676.4	2	3.1	0.99	0.99	2.306e-08	2.832e-08
Q8BI06	CEMIP	Cell migration-inducing and hyaluronan-binding protein OS=Mus musculus GN=Cemip PE=1 SV=4	153319	3	2.5		0.99		2.184e-08
Q62036	CP131	Centrosomal protein of 131 kDa OS=Mus musculus GN=Cep131 PE=1 SV=2	120562	3	2.8	1	1	8.087e-08	9.66e-09
Q8C166	CPNE1	Copine-1 OS=Mus musculus GN=Cpne1 PE=1 SV=1	59035.5	4	8.8		0.99		7.573e-08
P43135	COT2	COUP transcription factor 2 OS=Mus musculus GN=Nr2f2 PE=1 SV=2	45649.7	3	11.4		2		1.351e-07
Q3UGC7	EI3JA	Eukaryotic translation initiation factor 3 subunit J-A OS=Mus musculus GN=Eif3j1 PE=2 SV=1	25314.8	3	19.2		1		4.153e-08
Q3TZZ7	ESYT2	Extended synaptotagmin-2 OS=Mus musculus GN=Esyt2 PE=1 SV=1	94332.7	3	5.3		2		7.724e-08
Q78JE5	FBX22	F-box only protein 22 OS=Mus musculus GN=Fbxo22 PE=1 SV=2	44282.8	2	7.5		1		5.167e-08
P17439	GLCM	Glucosylceramidase OS=Mus musculus GN=Gba PE=1 SV=1	57729.3	2	5		1		6.004e-08
Q9QZF2	GPC1	Glypican-1 OS=Mus musculus GN=Gpc1 PE=1 SV=1	61482.8	3	8.4		1.99		2.067e-07
Q9JL35	HMGN5	High mobility group nucleosome-binding domain-containing protein 5 OS=Mus musculus GN=Hmgn5 PE=1 SV=2	45424.8	2	6.9		1		1.811e-07
Q8BY71	HAT1	Histone acetyltransferase type B catalytic subunit OS=Mus musculus GN=Hat1 PE=1 SV=1	49355	4	17.3		1		1.894e-08
Q61249	IGBP1	Immunoglobulin-binding protein 1 OS=Mus musculus GN=Igbp1 PE=1 SV=1	39036.6	2	5.9		2		1.729e-07
Q8BKG3	PTK7	Inactive tyrosine-protein kinase 7 OS=Mus musculus GN=Ptk7 PE=1 SV=1	117764	2	3.1		2		8.7e-08
Q9WTX2	PRKRA	Interferon-inducible double-stranded RNA-dependent protein kinase activator A OS=Mus musculus GN=Prkra PE=1 SV=1	34439.6	3	11.2		1		8.651e-08
Q00560	IL6RB	Interleukin-6 receptor subunit beta OS=Mus musculus GN=Il6st PE=1 SV=2	95564.3	2	9.2		1		1.289e-08
P97822-2	AN32E	Isoform 2 of Acidic leucine-rich nuclear phosphoprotein 32 family member E OS=Mus musculus GN=Anp32e	29677.4	2	30.8		1		2.3e-07
Q91XU0-2	WRIP1	Isoform 2 of ATPase WRNIP1 OS=Mus musculus GN=Wrnip1	71928.9	3	6.3		2		9.972e-08
Q8BM75-2	ARI5B	Isoform 2 of AT-rich interactive domain-containing protein 5B OS=Mus musculus GN=Arid5b	132097	4	5.3		2		5.923e-08
Q7TQK0-2	CCNT2	Isoform 2 of Cyclin-T2 OS=Mus musculus GN=Ccnt2	80401.4	2	4.6		1		3.667e-08
Q8QZX2-2	HAUS3	Isoform 2 of HAUS augmin-like complex subunit 3 OS=Mus musculus GN=Haus3	66429	5	11.8		1		5.457e-08
Q69ZS7-2	HBS1L	Isoform 2 of HBS1-like protein OS=Mus musculus GN=Hbs1l	74977.3	3	10.2		1		2.772e-08
Q8R3Y8-2	I2BP1	Isoform 2 of Interferon regulatory factor 2-binding protein 1 OS=Mus musculus GN=Irf2bp1	61874.1	2	4.6		1		6.847e-08
Q99JN2-2	KLH22	Isoform 2 of Kelch-like protein 22 OS=Mus musculus GN=Klhl22	48529.4	2	9.6		1		3.952e-08
Q8R5K4-2	NOL6	Isoform 2 of Nucleolar protein 6 OS=Mus musculus GN=Nol6	129489	3	3.6		1		3.677e-08
Q80TL7-2	MON2	Isoform 2 of Protein MON2 homolog OS=Mus musculus GN=Mon2	188736	3	1.8		1		1.96e-08
Q9CSU0-2	RPR1B	Isoform 2 of Regulation of nuclear pre-mRNA domain-containing protein 1B OS=Mus musculus GN=Rprd1b	22144.4	2	14.4		1.99		1.507e-07
O35144-2	TERF2	Isoform 2 of Telomeric repeat-binding factor 2 OS=Mus musculus GN=Terf2	60282.9	2	5.5		0.99		6.025e-08
Q8BY87-2	UBP47	Isoform 2 of Ubiquitin carboxyl-terminal hydrolase 47 OS=Mus musculus GN=Usp47	157452	3	2.6		1		1.413e-08
Q8CGY8-2	OGT1	Isoform 2 of UDP-N-acetylglucosamine--peptide N-acetylglucosaminyltransferase 110 kDa subunit OS=Mus musculus GN=Ogt	115966	23	30.8		1		2.46e-08
Q9WTI7-2	MYO1C	Isoform 2 of Unconventional myosin-Ic OS=Mus musculus GN=Myo1c	118388	57	55.8	1	1	5.752e-08	7.101e-08
Q8VDP2-2	CX056	Isoform 2 of UPF0428 protein CXorf56 homolog OS=Mus musculus	25871	3	17.1		1		1.157e-07
Q9WU78-3	PDC6I	Isoform 3 of Programmed cell death 6-interacting protein OS=Mus musculus GN=Pdcd6ip	96503.5	4	5.6		2		6.536e-08
O54916-3	REPS1	Isoform 3 of RalBP1-associated Eps domain-containing protein 1 OS=Mus musculus GN=Reps1	82156.3	2	3.8	1	1	3.605e-08	3.122e-08
Q8BRF7-3	SCFD1	Isoform 3 of Sec1 family domain-containing protein 1 OS=Mus musculus GN=Scfd1	72457.2	2	4.5		2		9.01e-08
Q80Y17	L2GL1	Lethal(2) giant larvae protein homolog 1 OS=Mus musculus GN=Llgl1 PE=1 SV=1	30828.5	3	13.6		1		2.105e-08
P62046	LRCH1	Leucine-rich repeat and calponin homology domain-containing protein 1 OS=Mus musculus GN=Lrch1 PE=1 SV=2	65041.4	2	4.3		0.99		3.909e-08
Q9DAR7	DCPS	m7GpppX diphosphatase OS=Mus musculus GN=Dcps PE=1 SV=1	39054.3	2	6.5		2		1.626e-07
Q9DBV4	MXRA8	Matrix remodeling-associated protein 8 OS=Mus musculus GN=Mxra8 PE=1 SV=1	35055.6	4	14.5		1		1.25e-07
Q8C052	MAP1S	Microtubule-associated protein 1S OS=Mus musculus GN=Map1s PE=1 SV=2	103250	3	5.4		1		7.382e-08
Q6ZPS1	Q6ZPS1	MKIAA1395 protein (Fragment) OS=Mus musculus GN=mKIAA1395 PE=3 SV=2	215374	6	3.6		1		1.387e-07
E9PWI3	E9PWI3	Mutated in colorectal cancers OS=Mus musculus GN=Mcc PE=1 SV=1	112240	2	5		1		2.916e-08
Q9R207	NBN	Nibrin OS=Mus musculus GN=Nbn PE=1 SV=1	83958.6	3	4.4		1		3.604e-08
Q9DBY8	NVL	Nuclear valosin-containing protein-like OS=Mus musculus GN=Nvl PE=1 SV=1	94669.1	3	5.8		3		9.517e-08
Q9WUV0	ORC5	Origin recognition complex subunit 5 OS=Mus musculus GN=Orc5 PE=2 SV=1	36287.6	2	6.7		1		1.149e-07
Q8BFV2	PCID2	PCI domain-containing protein 2 OS=Mus musculus GN=Pcid2 PE=1 SV=1	47095.5	2	8.8		0.99		6.581e-08
Q64378	FKBP5	Peptidyl-prolyl cis-trans isomerase FKBP5 OS=Mus musculus GN=Fkbp5 PE=1 SV=1	51059.6	3	6.4	1	2	4.256e-08	1.295e-07
Q8BU03	PWP2	Periodic tryptophan protein 2 homolog OS=Mus musculus GN=Pwp2 PE=1 SV=1	103417	2	9.7		1		5.135e-08
Q6P549	SHIP2	Phosphatidylinositol 3,4,5-trisphosphate 5-phosphatase 2 OS=Mus musculus GN=Inppl1 PE=1 SV=1	129198	5	5.2		2		3.321e-08
Q8K212	PACS1	Phosphofurin acidic cluster sorting protein 1 OS=Mus musculus GN=Pacs1 PE=1 SV=2	82605.1	3	7.9		1		1.864e-08
Q8BZH4	POGZ	Pogo transposable element with ZNF domain OS=Mus musculus GN=Pogz PE=1 SV=2	154366	3	3.6		1		1.942e-08
Q9DBE9	SPB1	pre-rRNA processing protein FTSJ3 OS=Mus musculus GN=Ftsj3 PE=1 SV=1	95708	3	5.7		1		3.175e-08
Q921N6	DDX27	Probable ATP-dependent RNA helicase DDX27 OS=Mus musculus GN=Ddx27 PE=1 SV=3	86101.3	5	6.6		1		9.703e-08
Q4FZF3	DDX49	Probable ATP-dependent RNA helicase DDX49 OS=Mus musculus GN=Ddx49 PE=2 SV=1	54185.8	2	5		2		1.294e-07
Q8K301	DDX52	Probable ATP-dependent RNA helicase DDX52 OS=Mus musculus GN=Ddx52 PE=2 SV=2	67249.9	3	9.6		1		3.188e-08
Q9QUR6	PPCE	Prolyl endopeptidase OS=Mus musculus GN=Prep PE=1 SV=1	82962	3	6.2		1		4.957e-08
Q571G4	LIN54	Protein lin-54 homolog OS=Mus musculus GN=Lin54 PE=2 SV=2	70597.1	3	9.1		0.99		3.517e-08
E9PYG6	E9PYG6	RAS p21 protein activator 1 OS=Mus musculus GN=Rasa1 PE=1 SV=1	93826.1	4	6.4		1		2.195e-08
A0A1L1SSL0	A0A1L1SSL0	Rho GTPase-activating protein 42 (Fragment) OS=Mus musculus GN=Arhgap42 PE=1 SV=1	20836.7	6	36.1		2		4.668e-07
Q9JJT0	RCL1	RNA 3'-terminal phosphate cyclase-like protein OS=Mus musculus GN=Rcl1 PE=2 SV=1	40888.7	2	8.3		1		8.541e-08
Q6P9R2	OXSR1	Serine/threonine-protein kinase OSR1 OS=Mus musculus GN=Oxsr1 PE=1 SV=1	50048.1	2	4.4		2		8.06e-08
Q9D8U8	SNX5	Sorting nexin-5 OS=Mus musculus GN=Snx5 PE=1 SV=1	46877.1	2	7.2		1		7.851e-08
E9Q1W7	E9Q1W7	TBC domain-containing protein kinase-like protein OS=Mus musculus GN=Tbck PE=1 SV=1	100828	3	4.5		0.99		1.791e-08
E9Q6P5	TTC7B	Tetratricopeptide repeat protein 7B OS=Mus musculus GN=Ttc7b PE=1 SV=1	94395.9	2	4.2		2		5.377e-08
P30051	TEAD1	Transcriptional enhancer factor TEF-1 OS=Mus musculus GN=Tead1 PE=1 SV=2	47782.9	2	5.9		0.51		2.05e-08
A0A0R4IZY9	A0A0R4IZY9	tRNA-dihydrouridine(47) synthase [NAD(P)(+)] OS=Mus musculus GN=Dus3l PE=1 SV=1	71285	2	5.2		1		1.172e-07
Q8R0J7	VP37B	Vacuolar protein sorting-associated protein 37B OS=Mus musculus GN=Vps37b PE=1 SV=1	31108.2	2	13	1	1	2.596e-08	9.715e-08
Q8BHB4	WDR3	WD repeat-containing protein 3 OS=Mus musculus GN=Wdr3 PE=1 SV=1	105979	3	5.3		1		3.305e-08
Q65Z40	WAPL	Wings apart-like protein homolog OS=Mus musculus GN=Wapl PE=1 SV=2	133609	2	2.7		1		1.486e-08
P99027	RLA2	60S acidic ribosomal protein P2 OS=Mus musculus GN=Rplp2 PE=1 SV=3	11661.8	2	27		1		3.919e-07
Q8K3A9	MEPCE	7SK snRNA methylphosphate capping enzyme OS=Mus musculus GN=Mepce PE=1 SV=2	72204.4	2	8.3		1		8.147e-09
P59999	ARPC4	Actin-related protein 2/3 complex subunit 4 OS=Mus musculus GN=Arpc4 PE=1 SV=3	19676.3	2	11.3		1		2.685e-07
Q99MJ9	DDX50	ATP-dependent RNA helicase DDX50 OS=Mus musculus GN=Ddx50 PE=2 SV=1	74743.1	2	5.4		1		2.345e-08
Q6P9R1	DDX51	ATP-dependent RNA helicase DDX51 OS=Mus musculus GN=Ddx51 PE=1 SV=1	70504.3	3	8.3		1		1.061e-07
P48758	CBR1	Carbonyl reductase [NADPH] 1 OS=Mus musculus GN=Cbr1 PE=1 SV=3	30694	4	17		1		1.213e-07
P62806	H4	Histone H4 OS=Mus musculus GN=Hist1h4a PE=1 SV=2	4912.83	2	41.9		0.99		1.277e-07
Q9CY58	PAIRB	Plasminogen activator inhibitor 1 RNA-binding protein OS=Mus musculus GN=Serbp1 PE=1 SV=2	44795.4	23	51.6		1		6.507e-08
Q91VJ2	PRDBP	Protein kinase C delta-binding protein OS=Mus musculus GN=Prkcdbp PE=1 SV=1	27908.7	2	15.8		1		4.782e-08
O88685	PRS6A	26S protease regulatory subunit 6A OS=Mus musculus GN=Psmc3 PE=1 SV=2	49643.6	29	72.4		0.97		4.368e-08
Q9Z2C4	MTMR1	Myotubularin-related protein 1 OS=Mus musculus GN=Mtmr1 PE=1 SV=1	13712	2	22.1		1		2.733e-08
Q9JJ66	CDC20	Cell division cycle protein 20 homolog OS=Mus musculus GN=Cdc20 PE=1 SV=2	54925.8	2	6.4		1		9.115e-09
Q60960	IMA5	Importin subunit alpha-5 OS=Mus musculus GN=Kpna1 PE=1 SV=2	60288.4	3	8.6		0.99		3.158e-08
O88448	KLC2	Kinesin light chain 2 OS=Mus musculus GN=Klc2 PE=1 SV=1	68558.1	5	12		0.99		5.855e-08
